# Supplementary material for: Progress and Trends in the Application of Google Earth and Google Earth Engine
Source: MDPI journal article supplement (doi:10.3390/rs13183778), 2021-09-21
Supplement: s1 [file s1]

## Sheet: Google Earth
Publication Type	Authors	Author Full Names	Article Title	Source Title	ISSN	eISSN	ISBN	Publication Date	Publication Year	Volume	Issue	Start Page	End Page	Article Number	DOI	UT (Unique WOS ID)	Pubmed Id
S	Essid, M; Colonna, FM; Boucelma, O; Betari, A	Essid, Mehdi; Colonna, Francois-Marie; Boucelma, Omar; Betari, Abdelkader	Querying mediated geographic data sources	ADVANCES IN DATABASE TECHNOLOGY - EDBT 2006	0302-9743	1611-3349	3-540-32960-9		2006	3896		1176	1181			WOS:000237081600086
J	Shen, C; Fan, J; Pi, L; Li, F	Shen, C.; Fan, J.; Pi, L.; Li, F.	Delineating lakes and enclosed islands in satellite imagery by geodesic active contour model	INTERNATIONAL JOURNAL OF REMOTE SENSING	0143-1161	1366-5901		DEC	2006	27	23-24	5253	5268		10.1080/01431160600857444	WOS:000244182300008
J	Yun, ZQ; Iskander, MF; Lim, SY; He, DY; Martinez, R	Yun, Zhengqing; Iskander, Magdy F.; Lim, Soo Yong; He, Donya; Martinez, Ralph	Radio wave propagation prediction based on 3-D building structures extracted from 2-D images	IEEE ANTENNAS AND WIRELESS PROPAGATION LETTERS	1536-1225				2007	6		557	559		10.1109/LAWP.2007.908011	WOS:000252622000148
J	Darter, MT; Lasky, TA; Ravani, B	Darter, Michael T.; Lasky, Ty A.; Ravani, Bahram	Transportation asset management and visualization using semantic models and Google Earth	TRANSPORTATION RESEARCH RECORD	0361-1981	2169-4052			2007		2024	27	34		10.3141/2024-04	WOS:000253233400004
J	Barker, S; Robarts, R; Yamashiki, Y; Takeuchi, K; Yoshimura, C; Muguetti, AC	Barker, Sabrina; Robarts, Richard; Yamashiki, Yosuke; Takeuchi, Kuniyoshi; Yoshimura, Chihiro; Muguetti, Ana Cristina	UNEP-GEMS/water programme - water quality data, GEMStat and open web services - and Japanese cooperation	HYDROLOGICAL PROCESSES	0885-6087			APR 30	2007	21	9	1132	1141		10.1002/hyp.6673	WOS:000246114000002
J	Compieta, P; Di Martino, S; Bertolotto, M; Ferrucci, F; Kechadi, T	Compieta, P.; Di Martino, S.; Bertolotto, M.; Ferrucci, F.; Kechadi, T.	Exploratory spatio-temporal data mining and visualization	JOURNAL OF VISUAL LANGUAGES AND COMPUTING	1045-926X	1095-8533		JUN	2007	18	3	255	279		10.1016/j.jvlc.2007.02.006	WOS:000247095900003
J	Patterson, TC	Patterson, Todd C.	Google Earth as a (not just) geography education tool	JOURNAL OF GEOGRAPHY	0022-1341	1752-6868		JUL-AUG	2007	106	4	145	152		10.1080/00221340701678032	WOS:000252123600001
J	Pearce, JM; Johnson, SJ; Grant, GB	Pearce, Joshua M.; Johnson, Sara J.; Grant, Gabriel B.	3D-mapping optimization of embodied energy of transportation	RESOURCES CONSERVATION AND RECYCLING	0921-3449			AUG	2007	51	2	435	453		10.1016/j.resconrec.2006.10.010	WOS:000247291100011
J	Bertolotto, M; Di Martino, S; Ferrucci, F; Kechadi, T	Bertolotto, M.; Di Martino, S.; Ferrucci, F.; Kechadi, T.	Towards a framework for mining and analysing spatio-temporal datasets	INTERNATIONAL JOURNAL OF GEOGRAPHICAL INFORMATION SCIENCE	1365-8816			SEP	2007	21	8	895	906		10.1080/13658810701349052	WOS:000248857500004
J	Ballagh, LM; Parsons, MA; Swick, R	Ballagh, Lisa M.; Parsons, Mark A.; Swick, Ross	Visualising cryospheric images in a virtual environment: present challenges and future implications	POLAR RECORD	0032-2474			OCT	2007	43	227	305	310		10.1017/S0032247407006523	WOS:000250601400003
J	Zook, MA; Graham, M	Zook, Matthew A.; Graham, Mark	The creative reconstruction of the Internet: Google and the privatization of cyberspace and DigiPlace	GEOFORUM	0016-7185	1872-9398		NOV	2007	38	6	1322	1343		10.1016/j.geoforum.2007.05.004	WOS:000250859000022
J	Wood, J; Dykes, J; Slingsby, A; Clarke, K	Wood, Jo; Dykes, Jason; Slingsby, Aidan; Clarke, Keith	Interactive visual exploration of a large spatio-temporal dataset: Reflections on a geovisualization mashup	IEEE TRANSACTIONS ON VISUALIZATION AND COMPUTER GRAPHICS	1077-2626	1941-0506		NOV-DEC	2007	13	6	1176	1183		10.1109/TVCG.2007.70570	WOS:000250401100017	17968062
J	Thenkabail, PS; Biradar, CM; Noojipady, P; Cai, XL; Dheeravath, V; Li, YJ; Velpuri, M; Gumma, M; Pandey, S	Thenkabail, Prasad S.; Biradar, Chandrashekhar M.; Noojipady, Praveen; Cai, Xueliang; Dheeravath, Venkateswarlu; Li, Yuanjie; Velpuri, Manohar; Gumma, MuraliKrishna; Pandey, Suraj	Sub-pixel area calculation methods for estimating irrigated areas	SENSORS		1424-8220		NOV	2007	7	11	2519	2538		10.3390/s7112519	WOS:000251238800004	28903243
J	Garfinkel, S	Garfinkel, Simson	Google earth - How Google maps the world	TECHNOLOGY REVIEW	1099-274X			NOV-DEC	2007	110	6	20	21			WOS:000250418200020
J	Zhang, B; Ai, NS; Huang, ZW; Yi, CB; Qin, FC	Zhang, Bin; Ai NanShan; Huang ZhengWen; Yi ChengBo; Qin FaCao	Meanders of the Jialing River in China: Morphology and formation	CHINESE SCIENCE BULLETIN	1001-6538	1861-9541		JAN	2008	53	2	267	281		10.1007/s11434-007-0516-2	WOS:000252973900015
J	Moller-Jensen, L; Jeppesen, H; Kofie, RY	Moller-Jensen, Lasse; Jeppesen, Henrik; Kofie, Richard Y.	GIS-facilitated spatial narratives: Danish plantations in Ghana	GEOGRAFISK TIDSSKRIFT-DANISH JOURNAL OF GEOGRAPHY	0016-7223	1903-2471			2008	108	2	49	57		10.1080/00167223.2008.10649588	WOS:000262592500006
J	Constantine, JA; Dunne, T	Constantine, Jose Antonio; Dunne, Thomas	Meander cutoff and the controls on the production of oxbow lakes	GEOLOGY	0091-7613	1943-2682		JAN	2008	36	1	23	26		10.1130/G24130A.1	WOS:000252118400006
J	Bodzin, AM	Bodzin, Alec M.	Integrating Instructional Technologies in a Local Watershed Investigation With Urban Elementary Learners	JOURNAL OF ENVIRONMENTAL EDUCATION	0095-8964	1940-1892			2008	39	2	47	57		10.3200/JOEE.39.2.47-58	WOS:000207741900004
J	Schultz, RB; Kerski, JJ; Patterson, TC	Schultz, Richard B.; Kerski, Joseph J.; Patterson, Todd C.	The use of virtual globes as a spatial teaching tool with suggestions for metadata standards	JOURNAL OF GEOGRAPHY	0022-1341				2008	107	1	27	34		10.1080/00221340802049844	WOS:000256998100005
J	Matsumoto, T; Hashimoto, S; Okude, N	Matsumoto, Takashi; Hashimoto, Sho; Okude, Noohito	The embodied Web: embodied Web-services interaction with an umbrella for augmented city experiences	COMPUTER ANIMATION AND VIRTUAL WORLDS	1546-4261	1546-427X		FEB	2008	19	1	49	66		10.1002/cav.222	WOS:000254675000006
J	Blamont, J	Blamont, Jacques	We the people: Consequences of the revolution in the management of space applications	SPACE POLICY	0265-9646			FEB	2008	24	1	13	21		10.1016/j.spacepol.2007.11.006	WOS:000254239200005
J	Luedeling, E; Buerkert, A	Luedeling, Eike; Buerkert, Andreas	Typology of oases in northern Oman based on Landsat and SRTM imagery and geological survey data	REMOTE SENSING OF ENVIRONMENT	0034-4257	1879-0704		MAR 18	2008	112	3	1181	1195		10.1016/j.rse.2007.08.007	WOS:000254443700043
J	Yuan, XR; Liu, YC; Yuen, DA; Chen, BQ; Pergler, T; Shi, YL	Yuan, Xiaoru; Liu, Yingchun; Yuen, David A.; Chen, Baoquan; Pergler, Tomas; Shi, Yaolin	An efficient system for creating synthetic InSAR images from simulations	PURE AND APPLIED GEOPHYSICS	0033-4553	1420-9136		APR	2008	165	3-4	671	691		10.1007/s00024-008-0328-6	WOS:000255867100013
J	McCaffrey, KJW; Feely, M; Hennessy, R; Thompson, J	McCaffrey, K. J. W.; Feely, M.; Hennessy, R.; Thompson, J.	Visualization of folding in marble outcrops, Connemara, western Ireland: An application of virtual outcrop technology	GEOSPHERE	1553-040X			JUN	2008	4	3	588	599		10.1130/GES00147.1	WOS:000256257600008
J	Brenner, M; Klein, P	Brenner, Michaela; Klein, Peter	Discovering the library with Google Earth	INFORMATION TECHNOLOGY AND LIBRARIES	0730-9295			JUN	2008	27	2	32	36		10.6017/ital.v27i2.3256	WOS:000257149900007
J	Lefer, TB; Anderson, MR; Fornari, A; Lambert, A; Fletcher, J; Baquero, M	Lefer, Theodore B.; Anderson, Matthew R.; Fornari, Alice; Lambert, Anastasia; Fletcher, Jason; Baquero, Maria	Using Google Earth as an innovative tool for community mapping	PUBLIC HEALTH REPORTS	0033-3549			JUL-AUG	2008	123	4	474	480		10.1177/003335490812300408	WOS:000256570700010	18763409
J	Lozano-Fuentes, S; Elizondo-Quiroga, D; Farfan-Ale, JA; Lorono-Pino, MA; Garcia-Rejon, J; Gomez-Carro, S; Lira-Zumbardo, V; Najera-Vazquez, R; Fernandez-Salas, I; Calderon-Martinez, J; Dominguez-Galera, M; Mis-Avila, P; Morris, N; Coleman, M; Moore, CG; Beaty, BJ; Eisen, L	Lozano-Fuentes, Saul; Elizondo-Quiroga, Darwin; Farfan-Ale, Jose Arturo; Lorono-Pino, Maria Alba; Garcia-Rejon, Julian; Gomez-Carro, Salvador; Lira-Zumbardo, Victor; Najera-Vazquez, Rosario; Fernandez-Salas, Ildefonso; Calderon-Martinez, Joaquin; Dominguez-Galera, Marco; Mis-Avila, Pedro; Morris, Natashia; Coleman, Michael; Moore, Chester G.; Beaty, Barry J.; Eisen, Lars	Use of Google Earth (TM) to strengthen public health capacity and facitlitate management of vector-borne diseases in resource-poor environments	BULLETIN OF THE WORLD HEALTH ORGANIZATION	0042-9686	1564-0604		SEP	2008	86	9	718	725		10.2471/BLT.07.045880	WOS:000259668800014	18797648
J	Husar, RB; Hoijarvi, K; Falke, SR; Robinson, EM; Percivall, GS	Husar, Rudolf B.; Hoijarvi, Kari; Falke, Stefan R.; Robinson, Erin M.; Percivall, George S.	DataFed: An Architecture for Federating Atmospheric Data for GEOSS	IEEE SYSTEMS JOURNAL	1932-8184	1937-9234		SEP	2008	2	3	366	373		10.1109/JSYST.2008.2003292	WOS:000207469900009
J	Scheffers, A; Kelletat, D; Scheffers, SR; Abbott, DH; Bryant, EA	Scheffers, A.; Kelletat, D.; Scheffers, S. R.; Abbott, D. H.; Bryant, E. A.	Chevrons-enigmatic sedimentary coastal features	ZEITSCHRIFT FUR GEOMORPHOLOGIE	0372-8854			SEP	2008	52	3	375	402		10.1127/0372-8854/2008/0052-0375	WOS:000259549200006
J	Ssegane, H; Tollner, EW; McCutcheon, SC	Ssegane, H.; Tollner, E. W.; McCutcheon, S. C.	ESTIMATION OF MICRO-WATERSHED TOPOGRAPHIC PARAMETERS USING EARTH OBSERVATORY TOOLS	APPLIED ENGINEERING IN AGRICULTURE	0883-8542	1943-7838		NOV	2008	24	6	763	766			WOS:000261937800007
J	Hamill, P	Hamill, Paul	Unit Testing Web Services	DR DOBBS JOURNAL	1044-789X			NOV	2008	33	11	53	+			WOS:000260058400011
J	Yue, J; Lei, JQ; Mu, GJ	Yue Jian; Lei JiaQiang; Mu GuiJin	Preliminary studies on the large-scale geomorphic patterns of the complex longitudinal sand ridge zone in the Taklimakan Desert	CHINESE SCIENCE BULLETIN	1001-6538			DEC	2008	53		177	189		10.1007/s11434-008-6021-4	WOS:000266556800022
J	Deelertpalboon, C; Parnichkun, M	Deelertpalboon, Chirdpong; Parnichkun, Manukid	Fusion of GPS, Compass, and Camera for Localization of an Intelligent Vehicle	INTERNATIONAL JOURNAL OF ADVANCED ROBOTIC SYSTEMS	1729-8814			DEC	2008	5	4	315	326			WOS:000264063100001
J	Craven, PV; Oman, P	Craven, Paul Vincent; Oman, Paul	Modeling the NAJPTC network using NS-2	INTERNATIONAL JOURNAL OF CRITICAL INFRASTRUCTURE PROTECTION	1874-5482	2212-2087		DEC	2008	1		29	36		10.1016/j.ijcip.2008.08.002	WOS:000208412800006
J	Mawdsley, JR	Mawdsley, Jonathan R.	Use of simple remote sensing tools to expedite surveys for rare tiger beetles (Insecta : Coleoptera : Cicindelidae)	JOURNAL OF INSECT CONSERVATION	1366-638X	1572-9753		DEC	2008	12	6	689	693		10.1007/s10841-007-9113-6	WOS:000259671900011
J	Monkkonen, P	Monkkonen, Paavo	Using Online Satellite Imagery as a Research Tool Mapping Changing Patterns of Urbanization in Mexico	JOURNAL OF PLANNING EDUCATION AND RESEARCH	0739-456X			WIN	2008	28	2	225	236		10.1177/0739456X08323771	WOS:000261946400007
J	Potere, D	Potere, David	Horizontal Positional Accuracy of Google Earth's High-Resolution Imagery Archive	SENSORS		1424-8220		DEC	2008	8	12	7973	7981		10.3390/s8127973	WOS:000261948200026	27873970
J	O'Brien, WP	O'Brien, William P., Jr.	Measuring magnetic declination with a compass, virtual globes and a global positioning system	INTERNATIONAL JOURNAL OF DIGITAL EARTH	1753-8947	1753-8955			2009	2	1	31	43		10.1080/17538940802585515	WOS:000270089800004
J	Thenkabail, PS; Biradar, CM; Noojipady, P; Dheeravath, V; Li, YJ; Velpuri, M; Gumma, M; Gangalakunta, ORP; Turral, H; Cai, XL; Vithanage, J; Schull, MA; Dutta, R	Thenkabail, Prasad S.; Biradar, Chandrashekhar M.; Noojipady, Praveen; Dheeravath, Venkateswarlu; Li, Yuanjie; Velpuri, Manohar; Gumma, Muralikrishna; Gangalakunta, Obi Reddy P.; Turral, Hugh; Cai, Xueliang; Vithanage, Jagath; Schull, Mitchell A.; Dutta, Rishiraj	Global irrigated area map (GIAM), derived from remote sensing, for the end of the last millennium	INTERNATIONAL JOURNAL OF REMOTE SENSING	0143-1161	1366-5901			2009	30	14	3679	3733		10.1080/01431160802698919	WOS:000269003100009
J	Potere, D; Schneider, A; Angel, S; Civco, DL	Potere, David; Schneider, Annemarie; Angel, Shlomo; Civco, Daniel L.	Mapping urban areas on a global scale: which of the eight maps now available is more accurate?	INTERNATIONAL JOURNAL OF REMOTE SENSING	0143-1161	1366-5901			2009	30	24	6531	6558		10.1080/01431160903121134	WOS:000273641500010
J	Bodzin, AM; Cirucci, L	Bodzin, Alec M.; Cirucci, Lori	Integrating Geospatial Technologies to Examine Urban Land Use Change: A Design Partnership	JOURNAL OF GEOGRAPHY	0022-1341				2009	108	4-5	186	197	PII 917886342	10.1080/00221340903344920	WOS:000272847100004
J	Weller, MB; Fisher, TG	Weller, Matthew B.; Fisher, Timothy G.	Feasibility Study of Mapping Continuous Water Planes Along the Southeast Lake Agassiz Basin	JOURNAL OF MAPS	1744-5647				2009	5	1	152	165		10.4113/jom.2009.1056	WOS:000273838200017
J	Weller, MB; Fisher, TG	Weller, Matthew B.; Fisher, Timothy G.	Feasibility Study of Mapping ContinuousWater Planes Along the Southeast Lake Agassiz Basin	JOURNAL OF MAPS	1744-5647				2009			152	165			WOS:000270657600012
J	Jedrzejas, T; Przybilla, HJ	Jedrzejas, Thomas; Przybilla, Heinz-Juergen	Generating Historical Urban 3D-Scenarios for Use in Google Earth Representing the Medieval City of Duisburg	PHOTOGRAMMETRIE FERNERKUNDUNG GEOINFORMATION	1432-8364				2009		3	199	207		10.1127/0935-1221/2009/0015	WOS:000268456200003
J	Strangeways, I	Strangeways, Ian	Using Google Earth to evaluate GCOS weather station sites	WEATHER	0043-1656			JAN	2009	64	1	4	8		10.1002/wea.334	WOS:000263413500002
J	Penev, L; Erwin, T; Miller, J; Chavan, V; Moritz, T; Griswold, C	Penev, Lyubomir; Erwin, Terry; Miller, Jeremy; Chavan, Vishwas; Moritz, Tom; Griswold, Charles	Publication and dissemination of datasets in taxonomy: ZooKeys working example	ZOOKEYS	1313-2989	1313-2970			2009		11	1	8		10.3897/zookeys.11.210	WOS:000266694500001
J	Kamadjeu, R	Kamadjeu, Raoul	Tracking the polio virus down the Congo River: a case study on the use of Google Earth (TM) in public health planning and mapping	INTERNATIONAL JOURNAL OF HEALTH GEOGRAPHICS	1476-072X			JAN 22	2009	8				4	10.1186/1476-072X-8-4	WOS:000263462700001	19161606
J	Helmer, EH; Lefsky, MA; Roberts, DA	Helmer, Eileen H.; Lefsky, Michael A.; Roberts, Dar A.	Biomass accumulation rates of Amazonian secondary forest and biomass of old-growth forests from Landsat time series and the Geoscience Laser Altimeter System	JOURNAL OF APPLIED REMOTE SENSING	1931-3195			JAN 27	2009	3				33505	10.1117/1.3082116	WOS:000271867800001
J	Chen, AJ; Leptoukh, G; Kempler, S; Lynnes, C; Savtchenko, A; Nadeau, D; Farley, J	Chen, Aijun; Leptoukh, Gregory; Kempler, Steven; Lynnes, Christopher; Savtchenko, Andery; Nadeau, Denis; Farley, John	Visualization of A-Train vertical profiles using Google Earth	COMPUTERS & GEOSCIENCES	0098-3004			FEB	2009	35	2	419	427		10.1016/j.cageo.2008.08.006	WOS:000263398200023
J	Weidmann, NB; Kuse, D	Weidmann, Nils B.; Kuse, Doreen	WarViews: Visualizing and Animating Geographic Data on Civil War	INTERNATIONAL STUDIES PERSPECTIVES	1528-3577			FEB	2009	10	1	36	48		10.1111/j.1528-3585.2008.00356.x	WOS:000281576600003
J	Viswanathan, G; Jaswanth, A; Gopalakrishnan, S; Ilango, SS	Viswanathan, Gopalan; Jaswanth, A.; Gopalakrishnan, S.; Ilango, S. Siva	Mapping of fluoride endemic areas and assessment of fluoride exposure	SCIENCE OF THE TOTAL ENVIRONMENT	0048-9697	1879-1026		FEB 15	2009	407	5	1579	1587		10.1016/j.scitotenv.2008.10.020	WOS:000263990600012	19041118
J	Gede, M	Gede, M.	PUBLISHING GLOBES ON THE INTERNET	ACTA GEODAETICA ET GEOPHYSICA HUNGARICA	1217-8977	1587-1037		MAR	2009	44	1	141	148		10.1556/AGeod.44.2009.1.14	WOS:000263934600014
J	Ryan, WBF; Carbotte, SM; Coplan, JO; O'Hara, S; Melkonian, A; Arko, R; Weissel, RA; Ferrini, V; Goodwillie, A; Nitsche, F; Bonczkowski, J; Zemsky, R	Ryan, William B. F.; Carbotte, Suzanne M.; Coplan, Justin O.; O'Hara, Suzanne; Melkonian, Andrew; Arko, Robert; Weissel, Rose Anne; Ferrini, Vicki; Goodwillie, Andrew; Nitsche, Frank; Bonczkowski, Juliet; Zemsky, Richard	Global Multi-Resolution Topography synthesis	GEOCHEMISTRY GEOPHYSICS GEOSYSTEMS	1525-2027			MAR 25	2009	10				Q03014	10.1029/2008GC002332	WOS:000264677800002
J	Aporta, C	Aporta, Claudio	The Trail as Home: Inuit and Their Pan-Arctic Network of Routes	HUMAN ECOLOGY	0300-7839			APR	2009	37	2	131	146		10.1007/s10745-009-9213-x	WOS:000265441100001
J	Jin, YQ; Wang, DF	Jin, Ya-Qiu; Wang, Dafang	Automatic Detection of Terrain Surface Changes After Wenchuan Earthquake, May 2008, From ALOS SAR Images Using 2EM-MRF Method	IEEE GEOSCIENCE AND REMOTE SENSING LETTERS	1545-598X	1558-0571		APR	2009	6	2	344	348		10.1109/LGRS.2009.2013875	WOS:000265376000035
J	Biradar, CM; Thenkabail, PS; Noojipady, P; Li, YJ; Dheeravath, V; Turral, H; Velpuri, M; Gumma, MK; Gangalakunta, ORP; Cai, XL; Xiao, XM; Schull, MA; Alankara, RD; Gunasinghe, S; Mohideen, S	Biradar, Chandrashekhar M.; Thenkabail, Prasad S.; Noojipady, Praveen; Li, Yuanjie; Dheeravath, Venkateswarlu; Turral, Hugh; Velpuri, Manohar; Gumma, Murali K.; Gangalakunta, Obi Reddy P.; Cai, Xueliang L.; Xiao, Xiangming; Schull, Mitchell A.; Alankara, Ranjith D.; Gunasinghe, Sarath; Mohideen, Sadir	A global map of rainfed cropland areas (GMRCA) at the end of last millennium using remote sensing	INTERNATIONAL JOURNAL OF APPLIED EARTH OBSERVATION AND GEOINFORMATION	0303-2434			APR	2009	11	2	114	129		10.1016/j.jag.2008.11.002	WOS:000265319300005
J	Wang, FZ; Helian, N; Wu, SN; Guo, YK; Deng, DY; Meng, LK; Zhang, W; Crowncroft, J; Bacon, J; Parker, MA	Wang, Frank Z.; Helian, Na; Wu, Sining; Guo, Yike; Deng, Derek Yuhui; Meng, Lingkui; Zhang, Wen; Crowncroft, Jon; Bacon, Jean; Parker, Michael Andrew	Eight Times Acceleration of Geospatial Data Archiving and Distribution on the Grids	IEEE TRANSACTIONS ON GEOSCIENCE AND REMOTE SENSING	0196-2892	1558-0644		MAY	2009	47	5	1444	1453		10.1109/TGRS.2008.2010055	WOS:000265487100019
J	Sheppard, SRJ; Cizek, P	Sheppard, Stephen R. J.; Cizek, Petr	The ethics of Google Earth: Crossing thresholds from spatial data to landscape visualisation	JOURNAL OF ENVIRONMENTAL MANAGEMENT	0301-4797	1095-8630		MAY	2009	90	6	2102	2117		10.1016/j.jenvman.2007.09.012	WOS:000266127700015	18599184
J	Sharma, S; Chauhan, S	Sharma, Subrat; Chauhan, Sheetal	Measurement errors in participatory GIS: role of individual workers	CURRENT SCIENCE	0011-3891			MAY 10	2009	96	9	1242	1246			WOS:000266405600024
J	Sato, HP; Harp, EL	Sato, H. P.; Harp, E. L.	Interpretation of earthquake-induced landslides triggered by the 12 May 2008, M7.9 Wenchuan earthquake in the Beichuan area, Sichuan Province, China using satellite imagery and Google Earth	LANDSLIDES	1612-510X	1612-5118		JUN	2009	6	2	153	159		10.1007/s10346-009-0147-6	WOS:000266262300007
J	Dialynas, E; Topalis, P; Vontas, J; Louis, C	Dialynas, Emmanuel; Topalis, Pantelis; Vontas, John; Louis, Christos	MIRO and IRbase: IT Tools for the Epidemiological Monitoring of Insecticide Resistance in Mosquito Disease Vectors	PLOS NEGLECTED TROPICAL DISEASES	1935-2735			JUN	2009	3	6			e465	10.1371/journal.pntd.0000465	WOS:000268401000007	19547750
J	Niu, ZG; Gong, P; Cheng, X; Guo, JH; Wang, L; Huang, HB; Shen, SQ; Wu, YZ; Wang, XF; Wang, XW; Ying, Q; Liang, L; Zhang, LN; Wang, L; Yao, Q; Yang, ZZ; Guo, ZQ; Dai, YJ	Niu ZhenGuo; Gong Peng; Cheng Xiao; Guo JianHong; Wang Lin; Huang HuaBing; Shen ShaoQing; Wu YunZhao; Wang XiaoFeng; Wang XianWei; Ying Qing; Liang Lu; Zhang LiNa; Wang Lei; Yao Qian; Yang ZhenZhong; Guo ZiQi; Dai YongJiu	Geographical characteristics of China's wetlands derived from remotely sensed data	SCIENCE IN CHINA SERIES D-EARTH SCIENCES	1006-9313			JUN	2009	52	6	723	738		10.1007/s11430-009-0075-2	WOS:000266927700001
J	Bodurow, CC; Creech, C; Hoback, A; Martin, J	Bodurow, Constance C.; Creech, Calvin; Hoback, Alan; Martin, Jordan	Multivariable Value Densification Modeling Using GIS	TRANSACTIONS IN GIS	1361-1682	1467-9671		JUN	2009	13		147	175		10.1111/j.1467-9671.2009.01163.x	WOS:000207963500009
J	Kingsbury, P; Jones, JP	Kingsbury, Paul; Jones, John Paul, III	Walter Benjamin's Dionysian Adventures on Google Earth	GEOFORUM	0016-7185	1872-9398		JUL	2009	40	4	502	513		10.1016/j.geoforum.2008.10.002	WOS:000268830600003
J	Crutcher, M; Zook, M	Crutcher, Michael; Zook, Matthew	Placemarks and waterlines: Racialized cyberscapes in post-Katrina Google Earth	GEOFORUM	0016-7185	1872-9398		JUL	2009	40	4	523	534		10.1016/j.geoforum.2009.01.003	WOS:000268830600005
J	Parks, L	Parks, Lisa	Digging into Google Earth: An analysis of Crisis in Darfur	GEOFORUM	0016-7185			JUL	2009	40	4	535	545		10.1016/j.geoforum.2009.04.004	WOS:000268830600006
J	Li, DR; Shao, ZF	Li DeRen; Shao ZhenFeng	The new era for geo-information	SCIENCE IN CHINA SERIES F-INFORMATION SCIENCES	1009-2757			JUL	2009	52	7	1233	1242		10.1007/s11432-009-0122-9	WOS:000268192800015
J	Chang, AY; Parrales, ME; Jimenez, J; Sobieszczyk, ME; Hammer, SM; Copenhaver, DJ; Kulkarni, RP	Chang, Aileen Y.; Parrales, Maria E.; Jimenez, Javier; Sobieszczyk, Magdalena E.; Hammer, Scott M.; Copenhaver, David J.; Kulkarni, Rajan P.	Combining Google Earth and GIS mapping technologies in a dengue surveillance system for developing countries	INTERNATIONAL JOURNAL OF HEALTH GEOGRAPHICS	1476-072X			JUL 23	2009	8				49	10.1186/1476-072X-8-49	WOS:000269821200001	19627614
J	Al-Mahmoud, MJ; Khalil, MH; Moustafa, AR	Al-Mahmoud, Mohammed J.; Khalil, Mesbah H.; Moustafa, Adel R.	The Jinadriyah anticlines: a surface model for oil fields in eastern Saudi Arabia	ARABIAN JOURNAL OF GEOSCIENCES	1866-7511			AUG	2009	2	3	213	234		10.1007/s12517-008-0031-z	WOS:000276932000002
J	Gemmell, AL; Smith, GC; Haines, K; Blower, JD	Gemmell, A. L.; Smith, G. C.; Haines, K.; Blower, J. D.	Validation of ocean model syntheses against hydrography using a new web application	JOURNAL OF OPERATIONAL OCEANOGRAPHY	1755-876X			AUG	2009	2	2	29	41		10.1080/1755876X.2009.12027739	WOS:000271014400004
J	Asner, GP; Knapp, DE; Balaji, A; Paez-Acosta, G	Asner, Gregory P.; Knapp, David E.; Balaji, Aravindh; Paez-Acosta, Guayana	Automated mapping of tropical deforestation and forest degradation: CLASlite	JOURNAL OF APPLIED REMOTE SENSING	1931-3195			AUG 18	2009	3				33543	10.1117/1.3223675	WOS:000271884400001
J	Ramchurn, SK; Moheeput, K; Goorah, SS	Ramchurn, S. K.; Moheeput, K.; Goorah, S. S.	AN ANALYSIS OF A SHORT-LIVED OUTBREAK OF DENGUE FEVER IN MAURITIUS	EUROSURVEILLANCE	1560-7917			AUG 27	2009	14	34	12	14	19314		WOS:000271463000003
J	Wright, TE; Burton, M; Pyle, DM; Caltabiano, T	Wright, T. E.; Burton, M.; Pyle, D. M.; Caltabiano, T.	Visualising volcanic gas plumes with virtual globes	COMPUTERS & GEOSCIENCES	0098-3004	1873-7803		SEP	2009	35	9	1837	1842		10.1016/j.cageo.2009.02.005	WOS:000270122600009
J	Fritz, S; McCallum, I; Schill, C; Perger, C; Grillmayer, R; Achard, F; Kraxner, F; Obersteiner, M	Fritz, Steffen; McCallum, Ian; Schill, Christian; Perger, Christoph; Grillmayer, Roland; Achard, Frederic; Kraxner, Florian; Obersteiner, Michael	Geo-Wiki.Org: The Use of Crowdsourcing to Improve Global Land Cover	REMOTE SENSING	2072-4292			SEP	2009	1	3	345	354		10.3390/rs1030345	WOS:000208400500013
J	Aanensen, DM; Huntley, DM; Feil, EJ; al-Own, F; Spratt, BG	Aanensen, David M.; Huntley, Derek M.; Feil, Edward J.; al-Own, Fada'a; Spratt, Brian G.	EpiCollect: Linking Smartphones to Web Applications for Epidemiology, Ecology and Community Data Collection	PLOS ONE	1932-6203			SEP 16	2009	4	9			e6968	10.1371/journal.pone.0006968	WOS:000269970000003	19756138
J	Ortega, KL; Smith, TM; Manross, KL; Scharfenberg, KA; Witt, A; Kolodziej, AG; Gourley, JJ	Ortega, Kiel L.; Smith, Travis M.; Manross, Kevin L.; Scharfenberg, Kevin A.; Witt, Arthur; Kolodziej, Angelyn G.; Gourley, Jonathan J.	THE SEVERE HAZARDS ANALYSIS AND VERIFICATION EXPERIMENT	BULLETIN OF THE AMERICAN METEOROLOGICAL SOCIETY	0003-0007			OCT	2009	90	10	1519	+		10.1175/2009BAMS2815.1	WOS:000271653500007
J	Beaudette, DE; O'Geen, AT	Beaudette, D. E.; O'Geen, A. T.	Soil-Web: An online soil survey for California, Arizona, and Nevada	COMPUTERS & GEOSCIENCES	0098-3004	1873-7803		OCT	2009	35	10	2119	2128		10.1016/j.cageo.2008.10.016	WOS:000271368500018
J	Benedek, C; Sziranyi, T	Benedek, Csaba; Sziranyi, Tamas	Change Detection in Optical Aerial Images by a Multilayer Conditional Mixed Markov Model	IEEE TRANSACTIONS ON GEOSCIENCE AND REMOTE SENSING	0196-2892	1558-0644		OCT	2009	47	10	3416	3430		10.1109/TGRS.2009.2022633	WOS:000270136200012
J	Chan, MC; Hu, SY; Jiang, JR	Chan, Mo-Che; Hu, Shun-Yun; Jiang, Jehn-Ruey	Secure peer-to-peer 3D streaming	MULTIMEDIA TOOLS AND APPLICATIONS	1380-7501	1573-7721		OCT	2009	45	1-3	369	384		10.1007/s11042-009-0294-8	WOS:000269534900016
J	Montesano, PM; Nelson, R; Sun, G; Margolis, H; Kerber, A; Ranson, KJ	Montesano, P. M.; Nelson, R.; Sun, G.; Margolis, H.; Kerber, A.; Ranson, K. J.	MODIS tree cover validation for the circumpolar taiga-tundra transition zone	REMOTE SENSING OF ENVIRONMENT	0034-4257	1879-0704		OCT	2009	113	10	2130	2141		10.1016/j.rse.2009.05.021	WOS:000269277200008
J	Lei, PL; Kao, GYM; Lin, SSJ; Sun, CT	Lei, Pei-Lan; Kao, Gloria Yi-Ming; Lin, Sunny S. J.; Sun, Chuen-Tsai	Impacts of geographical knowledge, spatial ability and environmental cognition on image searches supported by GIS software	COMPUTERS IN HUMAN BEHAVIOR	0747-5632	1873-7692		NOV	2009	25	6	1270	1279		10.1016/j.chb.2009.05.003	WOS:000270627500010
J	Ibrahim, D	Ibrahim, Dogan	GPS data logger with SD card storage and GOOGLE EARTH map interface	ELECTRONICS WORLD	1365-4675			NOV	2009	115	1883	28	34			WOS:000271573000011
J	Qu, HM; Wang, HM; Cui, WW; Wu, YC; Chan, MY	Qu, Huamin; Wang, Haomian; Cui, Weiwei; Wu, Yingcai; Chan, Ming-Yuen	Focus plus Context Route Zooming and Information Overlay in 3D Urban Environments	IEEE TRANSACTIONS ON VISUALIZATION AND COMPUTER GRAPHICS	1077-2626	1941-0506		NOV-DEC	2009	15	6	1547	1554		10.1109/TVCG.2009.144	WOS:000270778900088	19834232
J	Webley, PW; Dean, K; Bailey, JE; Dehn, J; Peterson, R	Webley, Peter W.; Dean, Kenneson; Bailey, John E.; Dehn, Jon; Peterson, Rorik	Automated forecasting of volcanic ash dispersion utilizing Virtual Globes	NATURAL HAZARDS	0921-030X	1573-0840		NOV	2009	51	2	345	361		10.1007/s11069-008-9246-2	WOS:000270385900008
J	van Overmeeren, R; Craeymeersch, J; van Dalfsen, J; Fey, F; van Heteren, S; Meesters, E	van Overmeeren, Ronnie; Craeymeersch, Johan; van Dalfsen, Jan; Fey, Frouke; van Heteren, Sytze; Meesters, Erik	Acoustic habitat and shellfish mapping and monitoring in shallow coastal water - Sidescan sonar experiences in The Netherlands	ESTUARINE COASTAL AND SHELF SCIENCE	0272-7714	1096-0015		NOV 30	2009	85	3	437	448		10.1016/j.ecss.2009.07.016	WOS:000272286000010
J	Asner, GP; Rudel, TK; Aide, TM; Defries, R; Emerson, R	Asner, Gregory P.; Rudel, Thomas K.; Aide, T. Mitchell; Defries, Ruth; Emerson, Ruth	A Contemporary Assessment of Change in Humid Tropical Forests	CONSERVATION BIOLOGY	0888-8892	1523-1739		DEC	2009	23	6	1386	1395		10.1111/j.1523-1739.2009.01333.x	WOS:000272163100011	20078639
J	Georgiadou, Y; Miscione, G; Lance, K; de Vries, W	Georgiadou, Yola; Miscione, Gianluca; Lance, Kate; de Vries, Walter	Framing the use of geo-information in government: a tale of two perspectives	EARTH SCIENCE INFORMATICS	1865-0473	1865-0481		DEC	2009	2	4	271	282		10.1007/s12145-009-0036-5	WOS:000207785800007
J	Bratton, BH	Bratton, Benjamin H.	On Geoscapes and the Google Caliphate Reflections on the Mumbai Attacks	THEORY CULTURE & SOCIETY	0263-2764	1460-3616		DEC	2009	26	7-8	329	342		10.1177/0263276409349826	WOS:000274468100021
J	Bigham, JM; Rice, TM; Pande, S; Lee, J; Park, SH; Gutierrez, N; Ragland, DR	Bigham, John M.; Rice, Thomas M.; Pande, Swati; Lee, Junhak; Park, Shin Hyoung; Gutierrez, Nicolas; Ragland, David R.	Geocoding police collision report data from California: a comprehensive approach	INTERNATIONAL JOURNAL OF HEALTH GEOGRAPHICS	1476-072X			DEC 29	2009	8				72	10.1186/1476-072X-8-72	WOS:000273714400001	20040106
J	Chen, NC; Li, DR; Di, LP; Gong, JY	Chen, Nengcheng; Li, Deren; Di, Liping; Gong, Jianya	An automatic SWILC classification and extraction for the AntSDI under a Sensor Web environment	CANADIAN JOURNAL OF REMOTE SENSING	0703-8992	1712-7971			2010	36		S1	S12		10.5589/m10-011	WOS:000282371000002
J	Jusoff, HK	Jusoff, Hj. Kamaruzaman	Pixel-based airborne hyperspectral sensing technique for search-and-rescue of the missing RMAF NURI helicopter in Genting-Sempah, Malaysia	DISASTER PREVENTION AND MANAGEMENT	0965-3562				2010	19	1	88	102		10.1108/09653561011022162	WOS:000275040800008
J	Shroder, JF; Weihs, BJ	Shroder, John F., Jr.; Weihs, Brandon J.	GEOMORPHOLOGY OF THE LAKE SHEWA LANDSLIDE DAM, BADAKHSHAN, AFGHANISTAN, USING REMOTE SENSING DATA	GEOGRAFISKA ANNALER SERIES A-PHYSICAL GEOGRAPHY	0435-3676	1468-0459			2010	92A	4	469	483		10.1111/j.1468-0459.2010.00408.x	WOS:000284962300004
J	Barbier, N; Couteron, P; Proisy, C; Malhi, Y; Gastellu-Etchegorry, JP	Barbier, Nicolas; Couteron, Pierre; Proisy, Christophe; Malhi, Yadvinder; Gastellu-Etchegorry, Jean-Philippe	The variation of apparent crown size and canopy heterogeneity across lowland Amazonian forests	GLOBAL ECOLOGY AND BIOGEOGRAPHY	1466-822X	1466-8238		JAN	2010	19	1	72	84		10.1111/j.1466-8238.2009.00493.x	WOS:000272573200007
J	Lee, M	Lee, Micky	A POLITICAL ECONOMIC CRITIQUE OF GOOGLE MAPS AND GOOGLE EARTH	INFORMATION COMMUNICATION & SOCIETY	1369-118X				2010	13	6	909	928		10.1080/13691180903456520	WOS:000288985800006
J	Denizhan, E; Cobanoglu, S; Kotaoglu, C	Denizhan, Evsel; Cobanoglu, Sultan; Kotaoglu, Caglar	ONE EXAMPLE OF USING GEOGRAPHIC INFORMATION SYSTEMS STUDIES IN THE FIELD IN ACAROLOGY: GOOGLE EARTH	INTERNATIONAL JOURNAL OF ACAROLOGY	0164-7954				2010	36	6	511	517		10.1080/01647954.2010.491799	WOS:000284888900006
J	Guo, JH; Liang, L; Gong, P	Guo, Jianhong; Liang, Lu; Gong, Peng	Removing shadows from Google Earth images	INTERNATIONAL JOURNAL OF REMOTE SENSING	0143-1161	1366-5901			2010	31	6	1379	1389		10.1080/01431160903475316	WOS:000277389100002
J	Mering, C; Baro, J; Upegui, E	Mering, Catherine; Baro, Johanna; Upegui, Erika	Retrieving urban areas on Google Earth images: application to towns of West Africa	INTERNATIONAL JOURNAL OF REMOTE SENSING	0143-1161				2010	31	22	5867	5877	PII 930699034	10.1080/01431161.2010.512311	WOS:000284956500008
J	Schutte, S	Schutte, Sebastian	Optimization and Falsification in Empirical Agent-Based Models	JASSS-THE JOURNAL OF ARTIFICIAL SOCIETIES AND SOCIAL SIMULATION	1460-7425			JAN	2010	13	1			2	10.18564/jasss.1503	WOS:000274138200014
J	Dittrich, A; Buerkert, A; Brinkmann, K	Dittrich, Andreas; Buerkert, Andreas; Brinkmann, Katja	Assessment of land use and land cover changes during the last 50 years in oases and surrounding rangelands of Xinjiang, NW China	JOURNAL OF AGRICULTURE AND RURAL DEVELOPMENT IN THE TROPICS AND SUBTROPICS	1612-9830				2010	111	2	129	142			WOS:000297185600007
J	Chen, XB; Yang, SZ; Wang, XH; Qiao, YL	Chen, Xin-bing; Yang, Shi-zhi; Wang, Xian-hua; Qiao, Yan-li	Satellite image blind restoration based on surface fitting and iterative Multishrinkage method in redundant wavelet domain	OPTIK	0030-4026				2010	121	21	1909	1911		10.1016/j.ijleo.2009.05.015	WOS:000284986400001
J	Levi, P	Levi, Peter	Digitising the past The beginning of a new future at the Royal Tropical Institute of The Netherlands	PROGRAM-ELECTRONIC LIBRARY AND INFORMATION SYSTEMS	0033-0337				2010	44	1	39	47		10.1108/00330331011019672	WOS:000275007500004
J	Jager, R; Oswald, M; Spohn, P	Jaeger, Reiner; Oswald, Manuel; Spohn, Peter	VirtualGOCA - Sensordata Generation for a Model/Software validation and the Planning and Analysis of Geomonitoring Scenarios in Virtual Geosensornetworks	WASSERWIRTSCHAFT	0043-0978				2010	100	10	34	37			WOS:000282853100007
J	Hoffmann, E; Winde, F	Hoffmann, E.; Winde, F.	Generating high-resolution digital elevation models for wetland research using Google Earth (TM) imagery - an example from South Africa	WATER SA	0378-4738	1816-7950		JAN	2010	36	1	53	68			WOS:000274194000007
J	Hai, PT; Magome, J; Yorozuya, A; Inomata, H; Fukami, K; Takeuchi, K	Hai, Pham T.; Magome, J.; Yorozuya, A.; Inomata, H.; Fukami, K.; Takeuchi, K.	Large-scale flooding analysis in the suburbs of Tokyo Metropolis caused by levee breach of the Tone River using a 2D hydrodynamic model	WATER SCIENCE AND TECHNOLOGY	0273-1223	1996-9732			2010	62	8	1859	1864		10.2166/wst.2010.381	WOS:000283675400018	20962401
J	Stoev, P; Akkari, N; Zapparoli, M; Porco, D; Enghoff, H; Edgecombe, GD; Georgiev, T; Penev, L	Stoev, Pavel; Akkari, Nesrine; Zapparoli, Marzio; Porco, David; Enghoff, Henrik; Edgecombe, Gregory D.; Georgiev, Teodor; Penev, Lyubomir	The centipede genus Eupolybothrus Verhoeff, 1907 (Chilopoda: Lithobiomorpha: Lithobiidae) in North Africa, a cybertaxonomic revision, with a key to all species in the genus and the first use of DNA barcoding for the group	ZOOKEYS	1313-2989	1313-2970			2010		50	29	77		10.3897/zookeys.50.504	WOS:000289657500004	21594115
J	Lang, DH; Corea, FVG	Lang, Dominik H.; Gutierrez Corea, F. Vladimir	RISe: Illustrating Georeferenced Data of Seismic Risk and Loss Assessment Studies Using Google Earth	EARTHQUAKE SPECTRA	8755-2930			FEB	2010	26	1	295	307		10.1193/1.3283906	WOS:000274179400015
J	Jensen, JL	Jensen, Jakob Linaa	Augmentation of Space: Four Dimensions of Spatial Experiences of Google Earth	SPACE AND CULTURE	1206-3312			FEB	2010	13	1	121	133		10.1177/1206331209353693	WOS:000290311700008
J	Yamagishi, Y; Yanaka, H; Suzuki, K; Tsuboi, S; Isse, T; Obayashi, M; Tamura, H; Nagao, H	Yamagishi, Yasuko; Yanaka, Hiroshi; Suzuki, Katsuhiko; Tsuboi, Seiji; Isse, Takehi; Obayashi, Masayuki; Tamura, Hajimu; Nagao, Hiromichi	Visualization of geoscience data on Google Earth: Development of a data converter system for seismic tomographic models	COMPUTERS & GEOSCIENCES	0098-3004			MAR	2010	36	3	373	382		10.1016/j.cageo.2009.08.007	WOS:000275566300011
J	Ravitz, G; Shyu, ML; Powell, MD	Ravitz, Guy; Shyu, Mei-Ling; Powell, Mark D.	INTEGRATING MULTIMEDIA SEMANTIC CONTENT ANALYSIS OF YOUTUBE VIDEOS WITH HURRICANE WIND ANALYSIS FOR PUBLIC SITUATION AWARENESS AND OUTREACH	INTERNATIONAL JOURNAL OF SOFTWARE ENGINEERING AND KNOWLEDGE ENGINEERING	0218-1940	1793-6403		MAR	2010	20	2	155	172		10.1142/S0218194010004670	WOS:000278423000004
J	Tang, LN; Shao, GF; Piao, ZJ; Dai, LM; Jenkins, MA; Wang, SX; Wu, G; Wu, JG; Zhao, JZ	Tang, Lina; Shao, Guofan; Piao, Zhengji; Dai, Limin; Jenkins, Michael A.; Wang, Shaoxian; Wu, Gang; Wu, Jianguo; Zhao, Jingzhu	Forest degradation deepens around and within protected areas in East Asia	BIOLOGICAL CONSERVATION	0006-3207	1873-2917		MAY	2010	143	5	1295	1298		10.1016/j.biocon.2010.01.024	WOS:000278427700032
J	Benetti, DD; Benetti, GI; Rivera, JA; Sardenberg, B; O'Hanlon, B	Benetti, Daniel D.; Benetti, Gabriel I.; Rivera, Jose A.; Sardenberg, Bruno; O'Hanlon, Brian	Site Selection Criteria for Open Ocean Aquaculture	MARINE TECHNOLOGY SOCIETY JOURNAL	0025-3324			MAY-JUN	2010	44	3	22	35		10.4031/MTSJ.44.3.11	WOS:000279756200003
J	Weng, JN; Wang, YJ; Cai, H	Weng JingNong; Wang YingJie; Cai Heng	Constructing a core framework of visual engine for Digital Earth system	SCIENCE CHINA-TECHNOLOGICAL SCIENCES	1674-7321			MAY	2010	53		38	43		10.1007/s11431-010-3214-2	WOS:000278697100006
J	Yue, P; Gong, JY; Xiang, LG; Chen, J	Yue Peng; Gong JianYa; Xiang LongGang; Chen Jing	Analysis-enhanced virtual globe for digital earth	SCIENCE CHINA-TECHNOLOGICAL SCIENCES	1674-7321			MAY	2010	53		61	67		10.1007/s11431-010-3202-6	WOS:000278697100009
J	Cinnamon, J; Schuurman, N	Cinnamon, Jonathan; Schuurman, Nadine	Injury surveillance in low-resource settings using Geospatial and Social Web technologies	INTERNATIONAL JOURNAL OF HEALTH GEOGRAPHICS	1476-072X			MAY 24	2010	9				25	10.1186/1476-072X-9-25	WOS:000279212600001	20497570
J	Contreras, DA	Contreras, Daniel A.	Huaqueros and remote sensing imagery: assessing looting damage in the Viru Valley, Peru	ANTIQUITY	0003-598X	1745-1744		JUN	2010	84	324	544	555		10.1017/S0003598X0006676X	WOS:000278797300019
J	Rivera, NIR; Gill, TE; Bleiweiss, MP; Hand, JL	Rivera, Nancy I. Rivera; Gill, Thomas E.; Bleiweiss, Max P.; Hand, Jenny L.	Source characteristics of hazardous Chihuahuan Desert dust outbreaks	ATMOSPHERIC ENVIRONMENT	1352-2310	1873-2844		JUN	2010	44	20	2457	2468		10.1016/j.atmosenv.2010.03.019	WOS:000279646600008
J	Stevison, BK; Biggs, PT; Abramson, CI	Stevison, Blake K.; Biggs, Patrick T.; Abramson, Charles I.	GOOGLE EARTH AS A SOURCE OF ANCILLARY MATERIAL IN A HISTORY OF PSYCHOLOGY CLASS	PSYCHOLOGICAL REPORTS	0033-2941	1558-691X		JUN	2010	106	3	665	670		10.2466/PR0.106.3.665-670	WOS:000280005100002	20712153
J	Taulman, JF	Taulman, James F.	Display of Animal Location Data and Kernel Home Range Contours in Google Earth Pro	AMERICAN MIDLAND NATURALIST	0003-0031			JUL	2010	164	1	157	164		10.1674/0003-0031-164.1.157	WOS:000279415500015
J	Wu, HY; He, ZW; Gong, JY	Wu, Huayi; He, Zhengwei; Gong, Jianya	A virtual globe-based 3D visualization and interactive framework for public participation in urban planning processes	COMPUTERS ENVIRONMENT AND URBAN SYSTEMS	0198-9715	1873-7587		JUL	2010	34	4	291	298		10.1016/j.compenvurbsys.2009.12.001	WOS:000279466200004
J	Yang, H; Robert, FA; Dalia, B; George, H	Yang, Hong; Robert, Adler F.; Dalia, Bach; George, Huffman	Capacity Building for Disaster Prevention in Vulnerable Regions of the World: Development of a Prototype Global Flood/Landslide Prediction System	DISASTER ADVANCES	0974-262X			JUL	2010	3	3	14	19			WOS:000280467500003
J	Tiwari, C; Rushton, G	Tiwari, Chetan; Rushton, Gerard	A Spatial Analysis System for Integrating Data, Methods and Models on Environmental Risks and Health Outcomes	TRANSACTIONS IN GIS	1361-1682			JUL	2010	14		177	195		10.1111/j.1467-9671.2010.01220.x	WOS:000292154400010
J	Miller, JA; Griswold, CE; Haddad, CR	Miller, Jeremy A.; Griswold, Charles E.; Haddad, Charles R.	Taxonomic revision of the spider family Penestomidae (Araneae, Entelegynae)	ZOOTAXA	1175-5326	1175-5334		JUL 13	2010		2534	1	36			WOS:000279805500001
J	Dai, JL; Wang, KY; Gao, XL	Dai Junliang; Wang Kaiyong; Gao Xiaolu	Spatial Structure and Land Use Control in Extended Metropolitan Region of Zhujiang River Delta, China	CHINESE GEOGRAPHICAL SCIENCE	1002-0063	1993-064X		AUG	2010	20	4	298	308		10.1007/s11769-010-0402-8	WOS:000279814200002
J	Leydesdorff, L; Persson, O	Leydesdorff, Loet; Persson, Olle	Mapping the Geography of Science: Distribution Patterns and Networks of Relations Among Cities and Institutes	JOURNAL OF THE AMERICAN SOCIETY FOR INFORMATION SCIENCE AND TECHNOLOGY	1532-2882	1532-2890		AUG	2010	61	8	1622	1634		10.1002/asi.21347	WOS:000280019100008
J	Ibrahim, A; Ibrahim, D	Ibrahim, Ahmet; Ibrahim, Dogan	Real-time GPS based outdoor WiFi localization system with map display	ADVANCES IN ENGINEERING SOFTWARE	0965-9978	1873-5339		SEP	2010	41	9	1080	1086		10.1016/j.advengsoft.2010.06.005	WOS:000281499100003
J	Hill, AW; Guralnick, RP	Hill, Andrew W.; Guralnick, Robert P.	GeoPhylo: an online tool for developing visualizations of phylogenetic trees in geographic space	ECOGRAPHY	0906-7590			SEP	2010	33	4	633	636		10.1111/j.1600-0587.2010.06312.x	WOS:000282176800001
J	Chen, AJ; Leptoukh, GG; Kempler, SJ	Chen, Aijun; Leptoukh, Gregory G.; Kempler, Steven J.	Using KML and Virtual Globes to Access and Visualize Heterogeneous Datasets and Explore Their Relationships Along the A-Train Tracks	IEEE JOURNAL OF SELECTED TOPICS IN APPLIED EARTH OBSERVATIONS AND REMOTE SENSING	1939-1404	2151-1535		SEP	2010	3	3	352	358		10.1109/JSTARS.2010.2046015	WOS:000283191200014
J	Prados, AI; Leptoukh, G; Lynnes, C; Johnson, J; Rui, HL; Chen, AJ; Husar, RB	Prados, Ana I.; Leptoukh, Gregory; Lynnes, Chris; Johnson, James; Rui, Hualan; Chen, Aijun; Husar, Rudolf B.	Access, Visualization, and Interoperability of Air Quality Remote Sensing Data Sets via the Giovanni Online Tool	IEEE JOURNAL OF SELECTED TOPICS IN APPLIED EARTH OBSERVATIONS AND REMOTE SENSING	1939-1404	2151-1535		SEP	2010	3	3	359	370		10.1109/JSTARS.2010.2047940	WOS:000283191200015
J	Dal Bosco, A; Mugnai, C; Sirri, F; Zamparini, C; Castellini, C	Dal Bosco, A.; Mugnai, C.; Sirri, F.; Zamparini, C.; Castellini, C.	Assessment of a global positioning system to evaluate activities of organic chickens at pasture	JOURNAL OF APPLIED POULTRY RESEARCH	1056-6171	1537-0437		SEP	2010	19	3	213	218		10.3382/japr.2010-00153	WOS:000281259000001
J	Marks, KM; Smith, WHF; Sandwell, DT	Marks, K. M.; Smith, W. H. F.; Sandwell, D. T.	Evolution of errors in the altimetric bathymetry model used by Google Earth and GEBCO	MARINE GEOPHYSICAL RESEARCH	0025-3235	1573-0581		SEP	2010	31	3	223	238		10.1007/s11001-010-9102-0	WOS:000284432300005
J	Farman, J	Farman, Jason	Mapping the digital empire: Google Earth and the process of postmodern cartography	NEW MEDIA & SOCIETY	1461-4448			SEP	2010	12	6	869	888		10.1177/1461444809350900	WOS:000282091000001
J	Jia, M; Choi, SY; Reiners, D; Wurtele, ES; Dickerson, JA	Jia, Ming; Choi, Suh-Yeon; Reiners, Dirk; Wurtele, Eve S.; Dickerson, Julie A.	MetNetGE: interactive views of biological networks and ontologies	BMC BIOINFORMATICS	1471-2105			SEP 17	2010	11				469	10.1186/1471-2105-11-469	WOS:000282656800003	20849585
J	Gonzalez-Orozco, CE; Mulligan, M; Trichon, V; Jarvis, A	Gonzalez-Orozco, Carlos E.; Mulligan, Mark; Trichon, Valerie; Jarvis, Andrew	Taxonomic identification of Amazonian tree crowns from aerial photography	APPLIED VEGETATION SCIENCE	1402-2001	1654-109X		OCT	2010	13	4	510	519		10.1111/j.1654-109X.2010.01090.x	WOS:000281556100011
J	Deepankar, C; Yamaji, MS	Deepankar, Choudhury; Yamaji, Mhaske Sumedh	Geospatial technology for study of Response System- phase of Earthquake Disaster Management of Mumbai city	DISASTER ADVANCES	0974-262X			OCT	2010	3	4	24	29			WOS:000282837700004
J	van Lammeren, R; Houtkamp, J; Colijn, S; Hilferink, M; Bouwman, A	van Lammeren, R.; Houtkamp, J.; Colijn, S.; Hilferink, M.; Bouwman, A.	Affective appraisal of 3D land use visualization	COMPUTERS ENVIRONMENT AND URBAN SYSTEMS	0198-9715	1873-7587		NOV	2010	34	6	465	475		10.1016/j.compenvurbsys.2010.07.001	WOS:000284745800003
J	Clarke, P; Ailshire, J; Melendez, R; Bader, M; Morenoff, J	Clarke, Philippa; Ailshire, Jennifer; Melendez, Robert; Bader, Michael; Morenoff, Jeffrey	Using Google Earth to conduct a neighborhood audit: Reliability of a virtual audit instrument	HEALTH & PLACE	1353-8292			NOV	2010	16	6	1224	1229		10.1016/j.healthplace.2010.08.007	WOS:000284135900019	20797897
J	Schneider, T; Schmidt, H	Schneider, Toby; Schmidt, Henrik	Unified Command and Control for Heterogeneous Marine Sensing Networks	JOURNAL OF FIELD ROBOTICS	1556-4959			NOV-DEC	2010	27	6	876	889		10.1002/rob.20346	WOS:000283394900010
J	Indelman, V; Gurfil, P; Rivlin, E; Rotstein, H	Indelman, Vadim; Gurfil, Pini; Rivlin, Ehud; Rotstein, Hector	Navigation Aiding Based on Coupled Online Mosaicking and Camera Scanning	JOURNAL OF GUIDANCE CONTROL AND DYNAMICS	0731-5090			NOV-DEC	2010	33	6	1866	1882		10.2514/1.48134	WOS:000284563600017
J	Gilbert, D	Gilbert, David	The Three Ages of Aerial Vision: London's Aerial Iconography from Wenceslaus Hollar to Google Earth	LONDON JOURNAL	0305-8034	1749-6322		NOV	2010	35	3	289	299		10.1179/174963210X12814015170278	WOS:000290966700006
J	Doi, R; Ranamukhaarachchi, SL	Doi, Ryoichi; Ranamukhaarachchi, S. L.	Discriminating Between Canopies of Natural Forest and Acacia Plantation Plots in a Google Earth Image to Evaluate Forest Land Rehabilitation by Acacia Species	INTERNATIONAL JOURNAL OF AGRICULTURE AND BIOLOGY	1560-8530	1814-9596		NOV	2010	12	6	921	925			WOS:000283976400023
J	Clark, ML; Aide, TM; Grau, HR; Riner, G	Clark, Matthew L.; Aide, T. Mitchell; Grau, H. Ricardo; Riner, George	A scalable approach to mapping annual land cover at 250 m using MODIS time series data: A case study in the Dry Chaco ecoregion of South America	REMOTE SENSING OF ENVIRONMENT	0034-4257	1879-0704		NOV 15	2010	114	11	2816	2832		10.1016/j.rse.2010.07.001	WOS:000282242000035
J	Neutens, T; Versichele, M; Schwanen, T	Neutens, Tijs; Versichele, Mathias; Schwanen, Tim	Arranging place and time: A GIS toolkit to assess person-based accessibility of urban opportunities	APPLIED GEOGRAPHY	0143-6228	1873-7730		DEC	2010	30	4	561	575		10.1016/j.apgeog.2010.05.006	WOS:000283010700010
J	Sun, EJ; Nieto, A; Li, ZX; Kecojevic, V	Sun, Enji; Nieto, Antonio; Li, Zhongxue; Kecojevic, Vladislav	An integrated information technology assisted driving system to improve mine trucks-related safety	SAFETY SCIENCE	0925-7535	1879-1042		DEC	2010	48	10	1490	1497		10.1016/j.ssci.2010.07.012	WOS:000282462300033
J	Cohen, WB; Yang, ZG; Kennedy, R	Cohen, Warren B.; Yang, Zhigiang; Kennedy, Robert	Detecting trends in forest disturbance and recovery using yearly Landsat time series: 2. TimeSync - Tools for calibration and validation	REMOTE SENSING OF ENVIRONMENT	0034-4257			DEC 15	2010	114	12	2911	2924		10.1016/j.rse.2010.07.010	WOS:000283400100008
J	Kizilcaoglu, A	Kizilcaoglu, Alaattin	Travel journals based on Google Earth	SCIENTIFIC RESEARCH AND ESSAYS	1992-2248			DEC 18	2010	5	24	3882	3895			WOS:000286527200012
J	Revuelto, RML	Luque Revuelto, Ricardo M.	THE USE OF DIGITAL IMAGE MAPPING AND RESOURCE TRAINING AS SECONDARY. SOME DETAILS ABOUT A GOOGLE EARTH	BOLETIN DE LA ASOCIACION DE GEOGRAFOS ESPANOLES	0212-9426				2011		55	183	+			WOS:000289751300009
J	Curtis, A; Mills, JW; Agustin, L; Cockburn, M	Curtis, Andrew; Mills, Jacqueline W.; Agustin, Loraine; Cockburn, Myles	Confidentiality risks in fine scale aggregations of health data	COMPUTERS ENVIRONMENT AND URBAN SYSTEMS	0198-9715			JAN	2011	35	1	57	64		10.1016/j.compenvurbsys.2010.08.002	WOS:000286955700006
J	Ballagh, LM; Raup, BH; Duerr, RE; Khalsa, SJS; Helm, C; Fowler, D; Gupte, A	Ballagh, Lisa M.; Raup, Bruce H.; Duerr, Ruth E.; Khalsa, Siri Jodha S.; Helm, Christopher; Fowler, Doug; Gupte, Amruta	Representing scientific data sets in KML: Methods and challenges	COMPUTERS & GEOSCIENCES	0098-3004	1873-7803		JAN	2011	37	1	57	64		10.1016/j.cageo.2010.05.004	WOS:000287004000007
J	Tomaszewski, B	Tomaszewski, Brian	Situation awareness and virtual globes: Applications for disaster management	COMPUTERS & GEOSCIENCES	0098-3004	1873-7803		JAN	2011	37	1	86	92		10.1016/j.cageo.2010.03.009	WOS:000287004000010
J	Benker, SC; Langford, RP; Pavlis, TL	Benker, S. Christian; Langford, Richard P.; Pavlis, Terry L.	Positional accuracy of the Google Earth terrain model derived from stratigraphic unconformities in the Big Bend region, Texas, USA	GEOCARTO INTERNATIONAL	1010-6049	1752-0762			2011	26	4	291	303		10.1080/10106049.2011.568125	WOS:000208631400004
J	Hett, C; Heinimann, A; Messerli, P	Hett, Cornelia; Heinimann, Andreas; Messerli, Peter	Spatial assessment of carbon stocks of living vegetation at the national level in Lao PDR	GEOGRAFISK TIDSSKRIFT-DANISH JOURNAL OF GEOGRAPHY	0016-7223	1903-2471			2011	111	1	11	26		10.1080/00167223.2011.10669519	WOS:000291474800001
J	Tateishi, R; Uriyangqai, B; Al-Bilbisi, H; Ghar, MA; Tsend-Ayush, J; Kobayashi, T; Kasimu, A; Hoan, NT; Shalaby, A; Alsaaideh, B; Enkhzaya, T; Gegentana; Sato, HP	Tateishi, Ryutaro; Uriyangqai, Bayaer; Al-Bilbisi, Hussam; Ghar, Mohamed Aboel; Tsend-Ayush, Javzandulam; Kobayashi, Toshiyuki; Kasimu, Alimujiang; Hoan, Nguyen Thanh; Shalaby, Adel; Alsaaideh, Bayan; Enkhzaya, Tsevengee; Gegentana; Sato, Hiroshi P.	Production of global land cover data - GLCNMO	INTERNATIONAL JOURNAL OF DIGITAL EARTH	1753-8947	1753-8955			2011	4	1	22	49	PII 922128429	10.1080/17538941003777521	WOS:000285198200003
J	Rao, G; Lin, AM	Rao, Gang; Lin, Aiming	Distribution of inundation by the great tsunami of the 2011 M-w 9.0 earthquake off the Pacific coast of Tohoku (Japan), as revealed by ALOS imagery data	INTERNATIONAL JOURNAL OF REMOTE SENSING	0143-1161	1366-5901			2011	32	22	7073	7086		10.1080/01431161.2011.613415	WOS:000298372800009
J	Brown, VH; Evans, DJA; Evans, IS	Brown, Victoria H.; Evans, David J. A.; Evans, Ian S.	The Glacial Geomorphology and Surficial Geology of the South-West English Lake District	JOURNAL OF MAPS	1744-5647				2011	7	1	221	243		10.4113/jom.2011.1187	WOS:000298021000004
J	Chen, SCC; Wang, JD; Yu, JKL; Chiang, TY; Chan, CC; Wang, HH; Nyasulu, YMZ; Kolola-Dzimadzi, R	Chen, Solomon Chih-Cheng; Wang, Jung-Der; Yu, Joseph Kwong-Leung; Chiang, Tzu-Yi; Chan, Chang-Chuan; Wang, Hsiu-Hung; Nyasulu, Yohane M. Z.; Kolola-Dzimadzi, Rose	Applying the Global Positioning System and Google Earth to Evaluate the Accessibility of Birth Services for Pregnant Women in Northern Malawi	JOURNAL OF MIDWIFERY & WOMENS HEALTH	1526-9523	1542-2011		JAN-FEB	2011	56	1	68	74		10.1111/j.1542-2011.2010.00005.x	WOS:000287374100011	21323853
J	Kuo, CY; Kao, HC	Kuo, Chung-Yen; Kao, Huan-Chin	Retracked Jason-2 Altimetry over Small Water Bodies: Case Study of Bajhang River, Taiwan	MARINE GEODESY	0149-0419	1521-060X			2011	34	3-4	382	392		10.1080/01490419.2011.584830	WOS:000297541600011
J	Shroder, JF; Schettler, MJ; Weihs, BJ	Shroder, John F.; Schettler, Megan Jensen; Weihs, Brandon J.	Loess failure in northeast Afghanistan	PHYSICS AND CHEMISTRY OF THE EARTH	1474-7065				2011	36	16	1287	1293		10.1016/j.pce.2011.03.001	WOS:000298900700008
J	Ridd, MF; Morley, CK	Ridd, Michael F.; Morley, Christopher K.	The Khao Yai Fault on the southern margin of the Khorat Plateau, and the pattern of faulting in Southeast Thailand	PROCEEDINGS OF THE GEOLOGISTS ASSOCIATION	0016-7878				2011	122	1	143	156		10.1016/j.pgeola.2010.08.008	WOS:000289926500013
J	Sukic, E; Rancic, D	Sukic, Enes; Rancic, Dejan	FOS GIS solutions in Web Mapping	TECHNICS TECHNOLOGIES EDUCATION MANAGEMENT-TTEM	1840-1503				2011	6	4	1083	1088			WOS:000299361700025
J	Chien, NQ; Tan, SK	Chien, Nguyen Quang; Tan, Soon Keat	Google Earth as a tool in 2-D hydrodynamic modeling	COMPUTERS & GEOSCIENCES	0098-3004			JAN	2011	37	1	38	46		10.1016/j.cageo.2010.03.006	WOS:000287004000005
J	Postpischl, L; Danecek, P; Morelli, A; Pondrelli, S	Postpischl, Luca; Danecek, Peter; Morelli, Andrea; Pondrelli, Silvia	Standardization of seismic tomographic models and earthquake focal mechanisms data sets based on web technologies, visualization with keyhole markup language	COMPUTERS & GEOSCIENCES	0098-3004			JAN	2011	37	1	47	56		10.1016/j.cageo.2010.05.006	WOS:000287004000006
J	De Paor, DG; Whitmeyer, SJ	De Paor, Declan G.; Whitmeyer, Steven J.	Geological and geophysical modeling on virtual globes using KML, COLLADA, and Javascript	COMPUTERS & GEOSCIENCES	0098-3004			JAN	2011	37	1	100	110		10.1016/j.cageo.2010.05.003	WOS:000287004000012
J	Moren, B; Heyman, J; Stroeven, AP	Moren, Bjorn; Heyman, Jakob; Stroeven, Arjen P.	Glacial geomorphology of the central Tibetan Plateau	JOURNAL OF MAPS	1744-5647				2011	7	1	115	125		10.4113/jom.2011.1161	WOS:000290233500010
J	Fensham, RJ; Powell, O; Horne, J	Fensham, Roderick J.; Powell, Owen; Horne, James	Rail survey plans to remote sensing: vegetation change in the Mulga Lands of eastern Australia and its implications for land use	RANGELAND JOURNAL	1036-9872	1834-7541			2011	33	3	229	238		10.1071/RJ11007	WOS:000294668600002
J	Kulo, VA; Bodzin, AM	Kulo, Violet A.; Bodzin, Alec M.	Integrating Geospatial Technologies in an Energy Unit	JOURNAL OF GEOGRAPHY	0022-1341	1752-6868			2011	110	6	239	251		10.1080/00221341.2011.566344	WOS:000297215100003
J	Sonmez, I; Erdi, E; Tekeli, AE; Demir, F; Arslan, M	Sonmez, Ibrahim; Erdi, Erdem; Tekeli, Ahmet Emre; Demir, Fatih; Arslan, Murat	Foogle: fire monitoring tool for EUMETSAT's active fire product over Turkey using Google Earth	GEOMATICS NATURAL HAZARDS & RISK	1947-5705	1947-5713			2011	2	1	1	13		10.1080/19475705.2010.532974	WOS:000307060100001
J	Zheng, S; Cao, CX; Zhang, H; Gao, MX; Xu, M; Zhao, J; Chen, W; Li, XW	Zheng, S.; Cao, C. X.; Zhang, H.; Gao, M. X.; Xu, M.; Zhao, J.; Chen, W.; Li, X. W.	Assessment of the degree of building damage caused by the 2010 Yushu, China earthquake using satellite and airborne data	GEOMATICS NATURAL HAZARDS & RISK	1947-5705				2011	2	2	141	157		10.1080/19475705.2011.553968	WOS:000307060300004
J	Williams, DB; Thomas, HE	Williams, Daniel B.; Thomas, Helen E.	An assessment of volcanic hazards to aviation - a case study from the 2009 Sarychev Peak eruption	GEOMATICS NATURAL HAZARDS & RISK	1947-5705	1947-5713			2011	2	3	233	246		10.1080/19475705.2011.558117	WOS:000307060400005
J	Taylor, BT; Fernando, P; Bauman, AE; Williamson, A; Craig, JC; Redman, S	Taylor, Bronwen T.; Fernando, Peter; Bauman, Adrian E.; Williamson, Anna; Craig, Jonathan C.; Redman, Sally	Measuring the Quality of Public Open Space Using Google Earth	AMERICAN JOURNAL OF PREVENTIVE MEDICINE	0749-3797	1873-2607		FEB	2011	40	2	105	112		10.1016/j.amepre.2010.10.024	WOS:000286184100002	21238857
J	Barbieri, AL; de Arruda, GF; Rodrigues, FA; Bruno, OM; Costa, LD	Barbieri, Andre L.; de Arruda, G. F.; Rodrigues, Francisco A.; Bruno, Odemir M.; Costa, Luciano da Fontoura	An entropy-based approach to automatic image segmentation of satellite images	PHYSICA A-STATISTICAL MECHANICS AND ITS APPLICATIONS	0378-4371	1873-2119		FEB 1	2011	390	3	512	518		10.1016/j.physa.2010.10.015	WOS:000285865500010
J	Jimenez, R; Yukich, JE	Jimenez, Raul; Yukich, J. E.	NONPARAMETRIC ESTIMATION OF SURFACE INTEGRALS	ANNALS OF STATISTICS	0090-5364			FEB	2011	39	1	232	260		10.1214/10-AOS837	WOS:000288183800007
J	Svenson, GJ; Roy, R	Svenson, Gavin J.; Roy, Roger	Taxonomic treatment of the endemic Malagasy praying mantis genus Hyalomantis GIGLIO-TOS, 1915, with a new synonymy and the description of three new species (Mantodea, Iridopterygidae, Tropidomantinae)	ZOOTAXA	1175-5326	1175-5334		FEB 25	2011		2777	1	24			WOS:000287711700001
J	Clark, ML; Aide, TM	Clark, Matthew L.; Aide, T. Mitchell	Virtual Interpretation of Earth Web-Interface Tool (VIEW-IT) for Collecting Land-Use/Land-Cover Reference Data	REMOTE SENSING		2072-4292		MAR	2011	3	3	601	620		10.3390/rs3030601	WOS:000306745800011
J	Gumma, MK; Thenkabail, PS; Nelson, A	Gumma, Murali Krishna; Thenkabail, Prasad S.; Nelson, Andrew	Mapping Irrigated Areas Using MODIS 250 Meter Time-Series Data: A Study on Krishna River Basin (India)	WATER		2073-4441		MAR	2011	3	1	113	131		10.3390/w3010113	WOS:000312254300006
J	Gong, P; Li, Z; Huang, HB; Sun, GQ; Wang, L	Gong, Peng; Li, Zhan; Huang, Huabing; Sun, Guoqing; Wang, Lei	ICESat GLAS Data for Urban Environment Monitoring	IEEE TRANSACTIONS ON GEOSCIENCE AND REMOTE SENSING	0196-2892	1558-0644		MAR	2011	49	3	1158	1172		10.1109/TGRS.2010.2070514	WOS:000287658000023
J	Cesetti, A; Frontoni, E; Mancini, A; Ascani, A; Zingaretti, P; Longhi, S	Cesetti, Andrea; Frontoni, Emanuele; Mancini, Adriano; Ascani, Andrea; Zingaretti, Primo; Longhi, Sauro	A Visual Global Positioning System for Unmanned Aerial Vehicles Used in Photogrammetric Applications	JOURNAL OF INTELLIGENT & ROBOTIC SYSTEMS	0921-0296	1573-0409		MAR	2011	61	1-4	157	168		10.1007/s10846-010-9489-5	WOS:000286778100011
J	Zhang, KQ; Leatherman, S	Zhang, Keqi; Leatherman, Stephen	Barrier Island Population along the U.S. Atlantic and Gulf Coasts	JOURNAL OF COASTAL RESEARCH	0749-0208	1551-5036		MAR	2011	27	2	356	363		10.2112/JCOASTRES-D-10-00126.1	WOS:000288306500013
J	Harris, L; Nel, R; Schoeman, D	Harris, Linda; Nel, Ronel; Schoeman, David	Mapping beach morphodynamics remotely: A novel application tested on South African sandy shores	ESTUARINE COASTAL AND SHELF SCIENCE	0272-7714	1096-0015		MAR 20	2011	92	1	78	89		10.1016/j.ecss.2010.12.013	WOS:000289820700009
J	Yamagishi, Y; Suzuki, K; Tamura, H; Yanaka, H; Tsuboi, S	Yamagishi, Yasuko; Suzuki, Katsuhiko; Tamura, Hajimu; Yanaka, Hiroshi; Tsuboi, Seiji	Visualization of geochemical data for rocks and sediments in Google Earth: Development of a data converter application for geochemical and isotopic data sets in database systems	GEOCHEMISTRY GEOPHYSICS GEOSYSTEMS	1525-2027			MAR 31	2011	12				Q03016	10.1029/2010GC003490	WOS:000289086400003
J	de Vriend, F; Boves, L; van Hout, R; Swanenberg, J	de Vriend, Folkert; Boves, Lou; van Hout, Roeland; Swanenberg, Jos	Visualization as a research tool for dialect geography using a geo-browser	LITERARY AND LINGUISTIC COMPUTING	0268-1145	1477-4615		APR	2011	26	1	17	34		10.1093/llc/fqq027	WOS:000288801500004
J	Kumar, CS	Kumar, Chaure Shailesh	GIS Compatible Software for finding numbers of Topographical and Open Series Maps	DISASTER ADVANCES	0974-262X			APR	2011	4	2	60	63			WOS:000293657300008
J	Tsai, YHE	Tsai, Yi-Hsin E.	PhyloGeoViz: a web-based program that visualizes genetic data on maps	MOLECULAR ECOLOGY RESOURCES	1755-098X			MAY	2011	11	3	557	561		10.1111/j.1755-0998.2010.02964.x	WOS:000289465500015	21481214
J	Luquero, FJ; Banga, CN; Remartinez, D; Palma, PP; Baron, E; Grais, RF	Luquero, Francisco J.; Banga, Cunhate Na; Remartinez, Daniel; Palma, Pedro Pablo; Baron, Emanuel; Grais, Rebeca F.	Cholera Epidemic in Guinea-Bissau (2008): The Importance of Place	PLOS ONE	1932-6203			MAY 4	2011	6	5			e19005	10.1371/journal.pone.0019005	WOS:000290224800013	21572530
J	Kennedy, D; Bishop, MC	Kennedy, David; Bishop, M. C.	Google earth and the archaeology of Saudi Arabia. A case study from the Jeddah area	JOURNAL OF ARCHAEOLOGICAL SCIENCE	0305-4403			JUN	2011	38	6	1284	1293		10.1016/j.jas.2011.01.003	WOS:000290420300011
J	Dorais, A; Cardille, J	Dorais, Alexis; Cardille, Jeffrey	Strategies for Incorporating High-Resolution Google Earth Databases to Guide and Validate Classifications: Understanding Deforestation in Borneo	REMOTE SENSING	2072-4292			JUN	2011	3	6	1157	1176		10.3390/rs3061157	WOS:000306749700005
J	Llorens, J; Gil, E; Llop, J; Queralto, M	Llorens, Jordi; Gil, Emilio; Llop, Jordi; Queralto, Meritxell	Georeferenced LiDAR 3D Vine Plantation Map Generation	SENSORS	1424-8220			JUN	2011	11	6	6237	6256		10.3390/s110606237	WOS:000292026400042	22163952
J	Carnieli, P; Oliveira, RD; Macedo, CI; Castilho, JG	Carnieli, Pedro, Jr.; Oliveira, Rafael de Novaes; Macedo, Carla Isabel; Castilho, Juliana Galera	Phylogeography of rabies virus isolated from dogs in Brazil between 1985 and 2006	ARCHIVES OF VIROLOGY	0304-8608	1432-8798		JUN	2011	156	6	1007	1012		10.1007/s00705-011-0942-y	WOS:000291056700009	21327782
J	Hughes, BJ; Martin, GR; Reynolds, SJ	Hughes, B. John; Martin, Graham R.; Reynolds, S. James	The use of Google Earth (TM) satellite imagery to detect the nests of masked boobies Sula dactylatra	WILDLIFE BIOLOGY	0909-6396	1903-220X		JUN	2011	17	2	210	216		10.2981/10-106	WOS:000293263100009
J	Kim, K; Oh, S; Lee, J; Essa, I	Kim, Kihwan; Oh, Sangmin; Lee, Jeonggyu; Essa, Irfan	Augmenting aerial earth maps with dynamic information from videos	VIRTUAL REALITY	1359-4338	1434-9957		JUN	2011	15	2-3	185	200		10.1007/s10055-010-0186-2	WOS:000296280200009
J	Madin, EMP; Madin, JS; Booth, DJ	Madin, Elizabeth M. P.; Madin, Joshua S.; Booth, David J.	Landscape of fear visible from space	SCIENTIFIC REPORTS	2045-2322			JUN 14	2011	1				14	10.1038/srep00014	WOS:000296046200014	22355533
J	Standart, GD; Stulken, KR; Zhang, X; Zong, ZL	Standart, G. D.; Stulken, K. R.; Zhang, X.; Zong, Z. L.	Geospatial visualization of global satellite images with Vis-EROS	ENVIRONMENTAL MODELLING & SOFTWARE	1364-8152			JUL	2011	26	7	980	982		10.1016/j.envsoft.2011.02.012	WOS:000290291100014
J	Brown Vega, M; Craig, N; Lindo, GA	Brown Vega, Margaret; Craig, Nathan; Lindo, Gerbert Asencios	Ground truthing of remotely identified fortifications on the Central Coast of Peru	JOURNAL OF ARCHAEOLOGICAL SCIENCE	0305-4403			JUL	2011	38	7	1680	1689		10.1016/j.jas.2011.02.035	WOS:000291771000027
J	Sabatier, Y; Azpilicueta, MM; Marchelli, P; Gonzalez-Penalba, M; Lozano, L; Garcia, L; Martinez, A; Gallo, LA; Umana, F; Bran, D; Pastorino, MJ	Sabatier, Yamila; Marta Azpilicueta, Maria; Marchelli, Paula; Gonzalez-Penalba, Marcelo; Lozano, Liliana; Garcia, Leandro; Martinez, Abel; Gallo, Leonardo A.; Umana, Fernando; Bran, Donaldo; Pastorino, Mario J.	Natural distribution of Nothofagus alpina and Nothofagus obliqua (Nothofagaceae) in Argentina, two productively important tree species of the North Patagonian temperate forests	BOLETIN DE LA SOCIEDAD ARGENTINA DE BOTANICA	1851-2372			JUL	2011	46	1-2	131	138			WOS:000293763000010
J	French, JR; Burningham, H	French, J. R.; Burningham, H.	Coastal geomorphology	PROGRESS IN PHYSICAL GEOGRAPHY-EARTH AND ENVIRONMENT	0309-1333	1477-0296		AUG	2011	35	4	535	545		10.1177/0309133311414606	WOS:000292888900006
J	Waltham, NJ; Connolly, RM	Waltham, Nathan J.; Connolly, Rod M.	Global extent and distribution of artificial, residential waterways in estuaries	ESTUARINE COASTAL AND SHELF SCIENCE	0272-7714	1096-0015		AUG 20	2011	94	2	192	197		10.1016/j.ecss.2011.06.003	WOS:000294978700009
J	Freitas, RR; Hartmann, C; Tagliani, PRA; Poersch, LH	Freitas, Rodrigo R.; Hartmann, Carlos; Tagliani, Paulo R. A.; Poersch, Luis H.	Evaluation of space adequateness of shrimp farms in Southern Brazil	ANAIS DA ACADEMIA BRASILEIRA DE CIENCIAS	0001-3765			SEP	2011	83	3	1069	1076		10.1590/S0001-37652011005000024	WOS:000294126600025	21808923
J	Hackney, C; Carling, P	Hackney, Christopher; Carling, Paul	The occurrence of obtuse junction angles and changes in channel width below tributaries along the Mekong River, south-east Asia	EARTH SURFACE PROCESSES AND LANDFORMS	0197-9337	1096-9837		SEP	2011	36	12	1563	1576		10.1002/esp.2165	WOS:000295139800001
J	Roy, R; Svenson, GJ	Roy, Roger; Svenson, Gavin J.	Revision of Platycalymma Westwood, 1889, and the synonymy of Ichromantis Paulian, 1957 (Mantodea, Iridopterygidae, Tropidomantinae)	ZOOTAXA	1175-5326	1175-5334		SEP 5	2011		3014	1	25			WOS:000294722300001
J	Papathanassiou, G; Pavlides, S	Papathanassiou, G.; Pavlides, Sp.	GIS-based database of historical liquefaction occurrences in the broader Aegean region, DALO v1.0	QUATERNARY INTERNATIONAL	1040-6182	1873-4553		OCT 1	2011	242	1	115	125		10.1016/j.quaint.2011.03.049	WOS:000294880000012
J	Bornmann, L; Waltman, L	Bornmann, Lutz; Waltman, Ludo	The detection of hot regions in the geography of science-A visualization approach by using density maps	JOURNAL OF INFORMETRICS	1751-1577	1875-5879		OCT	2011	5	4	547	553		10.1016/j.joi.2011.04.006	WOS:000296524200006
J	Arlinghaus, SL; Arlinghaus, WC	Arlinghaus, Sandra L.; Arlinghaus, William C.	Pneumatic Networks as Geographs	GEOGRAPHICAL ANALYSIS	0016-7363			OCT	2011	43	4	358	369		10.1111/j.1538-4632.2011.00826.x	WOS:000295698400003
J	Yang, CH; Everitt, JH; Goolsby, JA	Yang, Chenghai; Everitt, James H.; Goolsby, John A.	Mapping Giant Reed (Arundo donax) Infestations along the Texas-Mexico Portion of the Rio Grande with Aerial Photography	INVASIVE PLANT SCIENCE AND MANAGEMENT	1939-7291			OCT-DEC	2011	4	4	402	410		10.1614/IPSM-D-10-00081.1	WOS:000298824700004
J	Burton, EJ; Mitchell, L; Stride, CB	Burton, Elizabeth J.; Mitchell, Lynne; Stride, Chris B.	Good places for ageing in place: development of objective built environment measures for investigating links with older people's wellbeing	BMC PUBLIC HEALTH		1471-2458		NOV 1	2011	11				839	10.1186/1471-2458-11-839	WOS:000296974000001	22044518
J	Choi, Y; Nieto, A	Choi, Yosoon; Nieto, Antonio	Optimal haulage routing of off-road dump trucks in construction and mining sites using Google Earth and a modified least-cost path algorithm	AUTOMATION IN CONSTRUCTION	0926-5805			NOV	2011	20	7	982	997		10.1016/j.autcon.2011.03.015	WOS:000295994400022
J	Lu, YY; Behar, E; Donnelly, S; Lien, JM; Camelli, F; Wong, D	Lu, Yanyan; Behar, Evan; Donnelly, Stephen; Lien, Jyh-Ming; Camelli, Fernando; Wong, David	Fast and robust generation of city-scale seamless 3D urban models	COMPUTER-AIDED DESIGN	0010-4485	1879-2685		NOV	2011	43	11	1380	1390		10.1016/j.cad.2011.08.029	WOS:000297495200008
J	Johnson, GW; Gaylord, AG; Franco, JC; Cody, RP; Brady, JJ; Manley, W; Dover, M; Garcia-Lavigne, D; Score, R; Tweedie, CE	Johnson, G. Walker; Gaylord, Allison G.; Franco, Juan C.; Cody, Ryan P.; Brady, Jerald J.; Manley, William; Dover, Mike; Garcia-Lavigne, Diana; Score, Roberta; Tweedie, Craig E.	Development of the Arctic Research Mapping Application (ARMAP): Interoperability challenges and solutions	COMPUTERS & GEOSCIENCES	0098-3004	1873-7803		NOV	2011	37	11	1735	1742		10.1016/j.cageo.2011.04.004	WOS:000299139800003
J	Sun, LP; Liang, YS; Wu, HH; Tian, ZX; Dai, JR; Yang, K; Hong, QB; Zhou, XN; Yang, GJ	Sun, Le-Ping; Liang, You-Sheng; Wu, Hong-Hui; Tian, Zeng-Xi; Dai, Jian-Rong; Yang, Kun; Hong, Qing-Biao; Zhou, Xiao-Nong; Yang, Guo-Jing	A Google Earth-based surveillance system for schistosomiasis japonica implemented in the lower reaches of the Yangtze River, China	PARASITES & VECTORS	1756-3305			NOV 27	2011	4				223	10.1186/1756-3305-4-223	WOS:000298955900001	22117601
J	Bradley, ES; Roberts, DA; Dennison, PE; Green, RO; Eastwood, M; Lundeen, SR; McCubbin, IB; Leifer, I	Bradley, Eliza S.; Roberts, Dar A.; Dennison, Philip E.; Green, Robert O.; Eastwood, Michael; Lundeen, Sarah R.; McCubbin, Ian B.; Leifer, Ira	Google Earth and Google Fusion Tables in support of time-critical collaboration: Mapping the deepwater horizon oil spill with the AVIRIS airborne spectrometer	EARTH SCIENCE INFORMATICS	1865-0473	1865-0481		DEC	2011	4	4	169	179		10.1007/s12145-011-0085-4	WOS:000298228600002
J	Kennedy, D	Kennedy, David	The Works of the Old Men in Arabia: remote sensing in interior Arabia	JOURNAL OF ARCHAEOLOGICAL SCIENCE	0305-4403	1095-9238		DEC	2011	38	12	3185	3203		10.1016/j.jas.2011.05.027	WOS:000297384300003
J	Saqib, Z; Malik, RN; Shinwari, MI; Shinwari, ZK	Saqib, Zafeer; Malik, Riffat Naseem; Shinwari, Muhammad Ibrar; Shinwari, Zabta Khan	SPECIES RICHNESS, ETHNOBOTANICAL SPECIES RICHNESS AND HUMAN SETTLEMENTS ALONG A HIMALAYAN ALTITUDINAL GRADIENT: PRIORITIZING PLANT CONSERVATION IN PALAS VALLEY, PAKISTAN	PAKISTAN JOURNAL OF BOTANY	0556-3321	2070-3368		DEC	2011	43		129	133			WOS:000298173000019
J	Eresen, A; Imamoglu, N; Efe, MO	Eresen, Aydin; Imamoglu, Nevrez; Efe, Mehmet Onder	Autonomous quadrotor flight with vision-based obstacle avoidance in virtual environment	EXPERT SYSTEMS WITH APPLICATIONS	0957-4174	1873-6793		JAN	2012	39	1	894	905		10.1016/j.eswa.2011.07.087	WOS:000296214900094
J	Dodsworth, E; Nicholson, A	Dodsworth, Eva; Nicholson, Andrew	Academic Uses of Google Earth and Google Maps in a Library Setting	INFORMATION TECHNOLOGY AND LIBRARIES	0730-9295	2163-5226			2012	31	2	102	117		10.6017/ital.v31i2.1848	WOS:000209115600009
J	Xiao, CJ; Zhang, GY; Huang, DH; Ni, BF; Liu, CX; Qin, YL; Sun, HC; Wang, PS; Tian, WZ	Xiao, Caijin; Zhang, Guiying; Huang, Donghui; Ni, Bangfa; Liu, Cunxiong; Qin, Yali; Sun, Hongchao; Wang, Pingsheng; Tian, Weizhi	Preliminary study on air pollution source identification in Xinzhen, Beijing, using NAA and PIXE	JOURNAL OF RADIOANALYTICAL AND NUCLEAR CHEMISTRY	0236-5731	1588-2780		JAN	2012	291	1	95	100		10.1007/s10967-011-1307-4	WOS:000298010800017
J	Carvalho, LFR; de Melo, CB; McManus, C; Haddad, JPA	Ramos Carvalho, Luiz Felipe; de Melo, Cristiano Barros; McManus, Concepta; Amaral Haddad, Joao Paulo	Use of satellite images for geographical localization of livestock holdings in Brazil	PREVENTIVE VETERINARY MEDICINE	0167-5877	1873-1716		JAN 1	2012	103	1	74	77		10.1016/j.prevetmed.2011.08.006	WOS:000299448400008	21917345
J	Zhao, JL; Liu, C; Lv, TT; Dai, LJ	Zhao, Jinling; Liu, Chuang; Lv, Tingting; Dai, Lijun	Identification of landslide spatial distribution and their types along the Riviere Frorse Drainage Basin triggered by the earthquake in Haiti on 12 January 2010	DISASTER ADVANCES	0974-262X	2278-4543		JAN	2012	5	1	5	13			WOS:000299849900002
J	Guo, W; Maas, SJ	Guo, W.; Maas, S. J.	TERRACE LAYOUT DESIGN UTILIZING GEOGRAPHIC INFORMATION SYSTEM AND AUTOMATED GUIDANCE SYSTEM	APPLIED ENGINEERING IN AGRICULTURE	0883-8542	1943-7838		JAN	2012	28	1	31	38			WOS:000301898600004
J	Costanzo, D; Rotigliano, E; Irigaray, C; Jimenez-Peralvarez, JD; Chacon, J	Costanzo, D.; Rotigliano, E.; Irigaray, C.; Jimenez-Peralvarez, J. D.; Chacon, J.	Factors selection in landslide susceptibility modelling on large scale following the gis matrix method: application to the river Beiro basin (Spain)	NATURAL HAZARDS AND EARTH SYSTEM SCIENCES	1561-8633	1684-9981			2012	12	2	327	340		10.5194/nhess-12-327-2012	WOS:000300883100009
J	Robinson, P	Robinson, Peter	The e-mediated (Google Earth) gaze: an observational and semiotic perspective	CURRENT ISSUES IN TOURISM	1368-3500	1747-7603			2012	15	4	353	367		10.1080/13683500.2011.605111	WOS:000304478300003
J	Bedrina, T; Parodi, A; Quarati, A; Clematis, A	Bedrina, T.; Parodi, A.; Quarati, A.; Clematis, A.	ICT approaches to integrating institutional and non-institutional data services for better understanding of hydro-meteorological phenomena	NATURAL HAZARDS AND EARTH SYSTEM SCIENCES	1561-8633	1684-9981			2012	12	6	1961	1968		10.5194/nhess-12-1961-2012	WOS:000305829600013
J	Krakowka, AR	Krakowka, Amy Richmond	Field Trips as Valuable Learning Experiences in Geography Courses	JOURNAL OF GEOGRAPHY	0022-1341				2012	111	6	236	244		10.1080/00221341.2012.707674	WOS:000309718100003
J	Habib, E; Ma, Y; Williams, D; Sharif, HO; Hossain, F	Habib, E.; Ma, Y.; Williams, D.; Sharif, H. O.; Hossain, F.	HydroViz: design and evaluation of a Web-based tool for improving hydrology education	HYDROLOGY AND EARTH SYSTEM SCIENCES	1027-5606	1607-7938			2012	16	10	3767	3781		10.5194/hess-16-3767-2012	WOS:000310474300020
J	Davies, DJ; Collier, C; Howe, A	Davies, Daniel John; Collier, Christopher; Howe, Alan	A matter of interpretation: developing primary pupils' enquiry skills using position-linked datalogging	RESEARCH IN SCIENCE & TECHNOLOGICAL EDUCATION	0263-5143				2012	30	3	311	325		10.1080/02635143.2012.738420	WOS:000310896300006
J	Moro, RS; Gomes, IA; Pereira, TK	Moro, Rosemeri Segecin; Gomes, Ingrid Aparecida; Pereira, Tiaro Katu	Selecting ecotonal landscape units on Meridional Plateau, Southern Brazil	BOSQUE	0717-9200				2012	33	3	299	302		10.4067/S0717-92002012000300012	WOS:000311806400012
J	Rabumbulu, M; Holmes, PJ	Rabumbulu, Mulalo; Holmes, Peter J.	Depositional environments of the Florisbad Spring site and surrounds: a revised synthesis	SOUTH AFRICAN GEOGRAPHICAL JOURNAL	0373-6245	2151-2418			2012	94	2	191	207		10.1080/03736245.2012.747982	WOS:000312696200007
J	Mesibov, R	Mesibov, Robert	Known unknowns, Google Earth, plate tectonics and Mt Bellenden Ker: some thoughts on locality data	ZOOKEYS	1313-2989				2012		247	61	67		10.3897/zookeys.247.4195	WOS:000313199400004	23275756
J	Boggs, KJE; Dordevic, MM; Shipley, ST	Boggs, Katherine J. E.; Dordevic, Mladen M.; Shipley, Scott T.	Google Earth (R) Models with COLLADA and WxAzygy (R) Transparent Interface: An example from Grotto Creek, Front Ranges, Canadian Cordillera	GEOSCIENCE CANADA	0315-0941				2012	39		56	66			WOS:000314452800004
J	Jannat, M; Hunter-Zaworski, KM	Jannat, Mafruhatul; Hunter-Zaworski, Katharine M.	Planning Secondary Road Network for Low-Speed Vehicles in Small or Medium-Sized City with Google Earth	TRANSPORTATION RESEARCH RECORD	0361-1981				2012		2307	60	67		10.3141/2307-07	WOS:000315323900007
J	Trujillo, P; Piroddi, C; Jacquet, J	Trujillo, Pablo; Piroddi, Chiara; Jacquet, Jennifer	Fish Farms at Sea: The Ground Truth from Google Earth	PLOS ONE	1932-6203			FEB 8	2012	7	2			e30546	10.1371/journal.pone.0030546	WOS:000302730100015	22347383
J	Peruccacci, S; Brunetti, MT; Luciani, S; Vennari, C; Guzzetti, F	Peruccacci, Silvia; Brunetti, Maria Teresa; Luciani, Silvia; Vennari, Carmela; Guzzetti, Fausto	Lithological and seasonal control on rainfall thresholds for the possible initiation of landslides in central Italy	GEOMORPHOLOGY	0169-555X	1872-695X		FEB 15	2012	139		79	90		10.1016/j.geomorph.2011.10.005	WOS:000301158100007
J	Yang, XY; Jiang, GM; Luo, XZ; Zheng, Z	Yang, Xiaoying; Jiang, Geng-Ming; Luo, Xingzhang; Zheng, Zheng	Preliminary mapping of high-resolution rural population distribution based on imagery from Google Earth: A case study in the Lake Tai basin, eastern China	APPLIED GEOGRAPHY	0143-6228	1873-7730		MAR	2012	32	2	221	227		10.1016/j.apgeog.2011.05.008	WOS:000298362400004
J	Kim, SA; Shin, D; Choe, Y; Seibert, T; Walz, SP	Kim, Sung Ah; Shin, Dongyoun; Choe, Yoon; Seibert, Thomas; Walz, Steffen P.	Integrated energy monitoring and visualization system for Smart Green City development Designing a spatial information integrated energy monitoring model in the context of massive data management on a web based platform	AUTOMATION IN CONSTRUCTION	0926-5805	1872-7891		MAR	2012	22		51	59		10.1016/j.autcon.2011.07.004	WOS:000301637500006
J	Weinberger, R	Weinberger, Rachel	Death by a thousand curb-cuts: Evidence on the effect of minimum parking requirements on the choice to drive	TRANSPORT POLICY	0967-070X	1879-310X		MAR	2012	20		93	102		10.1016/j.tranpol.2011.08.002	WOS:000303140900009
J	Costanzo, D; Cappadonia, C; Conoscenti, C; Rotigliano, E	Costanzo, D.; Cappadonia, C.; Conoscenti, C.; Rotigliano, E.	Exporting a Google Earth (TM) aided earth-flow susceptibility model: a test in central Sicily	NATURAL HAZARDS	0921-030X			MAR	2012	61	1	103	114		10.1007/s11069-011-9870-0	WOS:000299954400007
J	Flemming, A; Meyne, S; Hildebrand, F; Koppert, W; Krettek, C; Adams, HA	Flemming, A.; Meyne, S.; Hildebrand, F.; Koppert, W.; Krettek, C.; Adams, H. A.	The ComPaS (c) Programme - Registration and allocation of treatment capacities in the event of mass casualties and disasters	ANASTHESIOLOGIE & INTENSIVMEDIZIN	0170-5334	1439-0256		MAR	2012	53		130	+			WOS:000301681100001
J	Harbord, J	Harbord, Janet	Ex-centric Cinema: Machinic Vision in the Powers of Ten and Electronic Cartography	BODY & SOCIETY	1357-034X	1460-3632		MAR	2012	18	1	99	119		10.1177/1357034X11430963	WOS:000302008700004
J	Janssen, I; Rosu, A	Janssen, Ian; Rosu, Andrei	Measuring sidewalk distances using Google Earth	BMC MEDICAL RESEARCH METHODOLOGY		1471-2288		MAR 29	2012	12				39	10.1186/1471-2288-12-39	WOS:000304422500001	22458340
J	Pender, M; Wotherspoon, L; Cubrinovski, M; Bowman, E; Orense, R	Pender, M.; Wotherspoon, L.; Cubrinovski, M.; Bowman, E.; Orense, R.	Evidence of earthquake-induced liquefaction obtained from GeoEye-1 images	GEOTECHNIQUE LETTERS	2049-825X	2045-2543		APR-JUN	2012	2		49	53		10.1680/geolett.11.00042	WOS:000324480800006
J	Sadr, K; Rodier, X	Sadr, Karim; Rodier, Xavier	Google Earth, GIS and stone-walled structures in southern Gauteng, South Africa	JOURNAL OF ARCHAEOLOGICAL SCIENCE	0305-4403			APR	2012	39	4	1034	1042		10.1016/j.jas.2011.11.024	WOS:000301161300024
J	De Paor, DG; Wild, SC; Dordevic, MM	De Paor, Declan G.; Wild, Steve C.; Dordevic, Mladen M.	Emergent and animated COLLADA models of the Tonga Trench and Samoa Archipelago: Implications for geoscience modeling, education, and research	GEOSPHERE	1553-040X			APR	2012	8	2	491	506		10.1130/GES00758.1	WOS:000302767800014
J	Lien, JM; Camelli, F; Wong, D; Lu, YY; McWhorter, B	Lien, Jyh-Ming; Camelli, Fernando; Wong, David; Lu, Yanyan; McWhorter, Benjamin	Creating building ground plans via robust K-way union A step toward large-scale simulation in urban environment	VISUAL COMPUTER	0178-2789	1432-2315		APR	2012	28	4	401	412		10.1007/s00371-011-0645-0	WOS:000302813300006
J	Ploton, P; Pelissier, R; Proisy, C; Flavenot, T; Barbier, N; Rai, SN; Couteron, P	Ploton, Pierre; Pelissier, Raphael; Proisy, Christophe; Flavenot, Theo; Barbier, Nicolas; Rai, S. N.; Couteron, Pierre	Assessing aboveground tropical forest biomass using Google Earth canopy images	ECOLOGICAL APPLICATIONS	1051-0761	1939-5582		APR	2012	22	3	993	1003		10.1890/11-1606.1	WOS:000303312000021	22645827
J	Yang, RD; Sheng, XY; Wei, X; Wen, XF	Yang Ruidong; Sheng Xueyong; Wei Xiao; Wen Xuefeng	Impact of Conjugated Shear Joint of X Type on Macroscopic Karstification on the Basis of the Analysis of Google Earth Images	ACTA GEOLOGICA SINICA-ENGLISH EDITION	1000-9515	1755-6724		APR	2012	86	2	520	530		10.1111/j.1755-6724.2012.00679.x	WOS:000303381900022
J	Ran, LS; Lu, XX	Ran, Lishan; Lu, X. X.	Delineation of reservoirs using remote sensing and their storage estimate: an example of the Yellow River basin, China	HYDROLOGICAL PROCESSES	0885-6087	1099-1085		APR 15	2012	26	8	1215	1229		10.1002/hyp.8224	WOS:000302397100010
J	Bovenga, F; Wasowski, J; Nitti, DO; Nutricato, R; Chiaradia, MT	Bovenga, F.; Wasowski, J.; Nitti, D. O.; Nutricato, R.; Chiaradia, M. T.	Using COSMO/SkyMed X-band and ENVISAT C-band SAR interferometry for landslides analysis	REMOTE SENSING OF ENVIRONMENT	0034-4257	1879-0704		APR 16	2012	119		272	285		10.1016/j.rse.2011.12.013	WOS:000301892200025
J	Galway, LP; Bell, N; Al Shatari, SAE; Hagopian, A; Burnham, G; Flaxman, A; Weiss, WM; Rajaratnam, J; Takaro, TK	Galway, Lindsay P.; Bell, Nathaniel; Al Shatari, Sahar A. E.; Hagopian, Amy; Burnham, Gilbert; Flaxman, Abraham; Weiss, Wiliam M.; Rajaratnam, Julie; Takaro, Tim K.	A two-stage cluster sampling method using gridded population data, a GIS, and Google Earth (TM) imagery in a population-based mortality survey in Iraq	INTERNATIONAL JOURNAL OF HEALTH GEOGRAPHICS	1476-072X			APR 27	2012	11				12	10.1186/1476-072X-11-12	WOS:000311281400001	22540266
J	Klancar, G; Blazic, S; Matko, D; Music, G	Klancar, Gregor; Blazic, Saso; Matko, Drago; Music, Gasper	Image-Based Attitude Control of a Remote Sensing Satellite	JOURNAL OF INTELLIGENT & ROBOTIC SYSTEMS	0921-0296	1573-0409		MAY	2012	66	3	343	357		10.1007/s10846-011-9621-1	WOS:000302490800004
J	Wheaton, JM; Garrard, C; Whitehead, K; Volk, CJ	Wheaton, Joseph M.; Garrard, Chris; Whitehead, Kelly; Volk, Carol J.	A simple, interactive GIS tool for transforming assumed total station surveys to real world coordinates - the CHaMP transformation tool	COMPUTERS & GEOSCIENCES	0098-3004			MAY	2012	42		28	36		10.1016/j.cageo.2012.02.003	WOS:000303291400004
J	Martinez-Torres, LM; Lopetegui, A; Eguiluz, L	Martinez-Torres, Luis M.; Lopetegui, Ane; Eguiluz, Luis	Automatic resolution of the three-points geological problem	COMPUTERS & GEOSCIENCES	0098-3004			MAY	2012	42		200	202		10.1016/j.cageo.2011.08.031	WOS:000303291400023
J	Yang, K; Sun, LP; Huang, YX; Yang, GJ; Wu, F; Hang, DR; Li, W; Zhang, JF; Liang, YS; Zhou, XN	Yang, Kun; Sun, Le-Ping; Huang, Yi-Xin; Yang, Guo-Jing; Wu, Feng; Hang, De-Rong; Li, Wei; Zhang, Jian-Feng; Liang, Yong-Sheng; Zhou, Xiao-Nong	A real-time platform for monitoring schistosomiasis transmission supported by Google Earth and a web-based geographical information system	GEOSPATIAL HEALTH	1827-1987	1970-7096		MAY	2012	6	2	195	203		10.4081/gh.2012.137	WOS:000304032300007	22639121
J	Phillips, R	Phillips, Richard	Curiosity and fieldwork	GEOGRAPHY	0016-7487			SUM	2012	97		78	85			WOS:000304495200004
J	Reyes, JF; Correa, C; Esquivel, W; Ortega, R	Reyes, Jose F.; Correa, Christian; Esquivel, Wilson; Ortega, Rodrigo	Development and field testing of a data acquisition system to assess the quality of spraying in fruit orchards	COMPUTERS AND ELECTRONICS IN AGRICULTURE	0168-1699			JUN	2012	84		62	67		10.1016/j.compag.2012.02.018	WOS:000304516900008
J	Ahamer, G	Ahamer, Gilbert	Geo-Referenceable Model for the Transfer of Radioactive Fallout from Sediments to Plants	WATER AIR AND SOIL POLLUTION	0049-6979	1573-2932		JUN	2012	223	5	2511	2524		10.1007/s11270-011-1044-x	WOS:000304467000048
J	Song, C; Liu, M; Wen, YG; Cao, JN; Chen, GH	Song Chao; Liu Ming; Wen Yonggang; Cao Jiannong; Chen Guihai	Buffer and Switch: Road-to-Road Routing Scheme for Intermittently Connected Vehicular Networks	CHINA COMMUNICATIONS	1673-5447			JUN	2012	9	6	55	70			WOS:000305818000006
J	Rowlands, G; Purkis, S; Riegl, B; Metsamaa, L; Bruckner, A; Renaud, P	Rowlands, Gwilym; Purkis, Sam; Riegl, Bernhard; Metsamaa, Liisa; Bruckner, Andrew; Renaud, Philip	Satellite imaging coral reef resilience at regional scale. A case-study from Saudi Arabia	MARINE POLLUTION BULLETIN	0025-326X	1879-3363		JUN	2012	64	6	1222	1237		10.1016/j.marpolbul.2012.03.003	WOS:000306032700031	22480935
J	Curtis, JW; Curtis, A; Upperman, JS	Curtis, Jacqueline W.; Curtis, Andrew; Upperman, Jeffrey S.	Using a Geographic Information System (GIS) to Assess Pediatric Surge Potential After an Earthquake	DISASTER MEDICINE AND PUBLIC HEALTH PREPAREDNESS	1935-7893	1938-744X		JUN	2012	6	2	163	169		10.1001/dmp.2012.25	WOS:000309724900015	22700026
J	Fadel, MA; Hussein, AS; Al Maamari, M	Fadel, Moustafa A.; Hussein, Ahmed S.; Al Maamari, Mohammed	Mapping poultry farms in the UAE utilizing GIS technology	JOURNAL OF FOOD AGRICULTURE & ENVIRONMENT	1459-0255			JUL-OCT	2012	10	3-4	567	571			WOS:000311600700001
J	Goodchild, MF; Guo, HD; Annoni, A; Bian, L; de Bie, K; Campbell, F; Craglia, M; Ehlers, M; van Genderen, J; Jackson, D; Lewis, AJ; Pesaresi, M; Remetey-Fulopp, G; Simpson, R; Skidmore, A; Wang, CL; Woodgate, P	Goodchild, Michael F.; Guo, Huadong; Annoni, Alessandro; Bian, Ling; de Bie, Kees; Campbell, Frederick; Craglia, Max; Ehlers, Manfred; van Genderen, John; Jackson, Davina; Lewis, Anthony J.; Pesaresi, Martino; Remetey-Fueloepp, Gabor; Simpson, Richard; Skidmore, Andrew; Wang, Changlin; Woodgate, Peter	Next-generation Digital Earth	PROCEEDINGS OF THE NATIONAL ACADEMY OF SCIENCES OF THE UNITED STATES OF AMERICA	0027-8424			JUL 10	2012	109	28	11088	11094		10.1073/pnas.1202383109	WOS:000306642100020	22723346
J	Schicker, R; Moon, V	Schicker, Renee; Moon, Vicki	Comparison of bivariate and multivariate statistical approaches in landslide susceptibility mapping at a regional scale	GEOMORPHOLOGY	0169-555X	1872-695X		AUG 1	2012	161		40	57		10.1016/j.geomorph.2012.03.036	WOS:000305672700004
J	Aksoy, S; Yalniz, IZ; Tasdemir, K	Aksoy, Selim; Yalniz, Ismet Zeki; Tasdemir, Kadim	Automatic Detection and Segmentation of Orchards Using Very High Resolution Imagery	IEEE TRANSACTIONS ON GEOSCIENCE AND REMOTE SENSING	0196-2892	1558-0644		AUG	2012	50	8	3117	3131		10.1109/TGRS.2011.2180912	WOS:000306691200015
J	Stocker, L; Burke, G; Kennedy, D; Wood, D	Stocker, Laura; Burke, Gary; Kennedy, Deborah; Wood, David	Sustainability and climate adaptation: Using Google Earth to engage stakeholders	ECOLOGICAL ECONOMICS	0921-8009	1873-6106		AUG	2012	80		15	24		10.1016/j.ecolecon.2012.04.024	WOS:000306822900003
J	Blenkinsop, TG	Blenkinsop, T. G.	Visualizing structural geology: From Excel to Google Earth	COMPUTERS & GEOSCIENCES	0098-3004			AUG	2012	45		52	56		10.1016/j.cageo.2012.03.007	WOS:000306771100007
J	Sanchez-Cuervo, AM; Aide, TM; Clark, ML; Etter, A	Sanchez-Cuervo, Ana Maria; Aide, T. Mitchell; Clark, Matthew L.; Etter, Andres	Land Cover Change in Colombia: Surprising Forest Recovery Trends between 2001 and 2010	PLOS ONE	1932-6203			AUG 29	2012	7	8			e43943	10.1371/journal.pone.0043943	WOS:000308206000061	22952816
J	Van Den Eeckhaut, M; Hervas, J; Jaedicke, C; Malet, JP; Montanarella, L; Nadim, F	Van Den Eeckhaut, M.; Hervas, J.; Jaedicke, C.; Malet, J. -P.; Montanarella, L.; Nadim, F.	Statistical modelling of Europe-wide landslide susceptibility using limited landslide inventory data	LANDSLIDES	1612-510X	1612-5118		SEP	2012	9	3	357	369		10.1007/s10346-011-0299-z	WOS:000308253000005
J	Schneider, A	Schneider, Annemarie	Monitoring land cover change in urban and pen-urban areas using dense time stacks of Landsat satellite data and a data mining approach	REMOTE SENSING OF ENVIRONMENT	0034-4257	1879-0704		SEP	2012	124		689	704		10.1016/j.rse.2012.06.006	WOS:000311247700058
J	Helmer, EH; Ruzycki, TS; Benner, J; Voggesser, SM; Scobie, BP; Park, C; Fanning, DW; Ramnarine, S	Helmer, E. H.; Ruzycki, Thomas S.; Benner, Jay; Voggesser, Shannon M.; Scobie, Barbara P.; Park, Courtenay; Fanning, David W.; Ramnarine, Seepersad	Detailed maps of tropical forest types are within reach: Forest tree communities for Trinidad and Tobago mapped with multiseason Landsat and multiseason fine-resolution imagery	FOREST ECOLOGY AND MANAGEMENT	0378-1127	1872-7042		SEP 1	2012	279		147	166		10.1016/j.foreco.2012.05.016	WOS:000307092900016
J	Montaser, A; Bakry, I; Alshibani, A; Moselhi, O	Montaser, Ali; Bakry, Ibrahim; Alshibani, Adel; Moselhi, Osama	Estimating productivity of earthmoving operations using spatial technologies	CANADIAN JOURNAL OF CIVIL ENGINEERING	0315-1468	1208-6029		SEP	2012	39	9	1072	1082		10.1139/L2012-059	WOS:000308147700012
J	Perissin, D; Wang, ZY; Lin, H	Perissin, Daniele; Wang, Zhiying; Lin, Hui	Shanghai subway tunnels and highways monitoring through Cosmo-SkyMed Persistent Scatterers	ISPRS JOURNAL OF PHOTOGRAMMETRY AND REMOTE SENSING	0924-2716	1872-8235		SEP	2012	73		58	67		10.1016/j.isprsjprs.2012.07.002	WOS:000311177600008
J	Sun, XJ; Shen, SH; Leptoukh, GG; Wang, PX; Di, LP; Lu, MY	Sun, Xiaojuan; Shen, Suhung; Leptoukh, Gregory G.; Wang, Panxing; Di, Liping; Lu, Mingyue	Development of a Web-based visualization platform for climate research using Google Earth	COMPUTERS & GEOSCIENCES	0098-3004	1873-7803		OCT	2012	47		160	168		10.1016/j.cageo.2011.09.010	WOS:000308517700016
J	Taylor, JR; Lovell, ST	Taylor, John R.; Lovell, Sarah Taylor	Mapping public and private spaces of urban agriculture in Chicago through the analysis of high-resolution aerial images in Google Earth	LANDSCAPE AND URBAN PLANNING	0169-2046	1872-6062		OCT	2012	108	1	57	70		10.1016/j.landurbplan.2012.08.001	WOS:000309616100007
J	Vuolo, F; Atzberger, C	Vuolo, Francesco; Atzberger, Clement	Exploiting the Classification Performance of Support Vector Machines with Multi-Temporal Moderate-Resolution Imaging Spectroradiometer (MODIS) Data in Areas of Agreement and Disagreement of Existing Land Cover Products	REMOTE SENSING	2072-4292			OCT	2012	4	10	3143	3167		10.3390/rs4103143	WOS:000313914100013
J	Zong, ZL; Job, JS; Zhang, XS; Nijim, M; Qin, X	Zong, Ziliang; Job, Joshua; Zhang, Xuesong; Nijim, Mais; Qin, Xiao	Case study of visualizing global user download patterns using Google Earth and NASA World Wind	JOURNAL OF APPLIED REMOTE SENSING	1931-3195			OCT 9	2012	6				61703	10.1117/1.JRS.6.061703	WOS:000310700700001
J	Goswami, R; Brocklehurst, SH; Mitchell, NC	Goswami, R.; Brocklehurst, S. H.; Mitchell, N. C.	Erosion of a tectonically uplifting coastal landscape, NE Sicily, Italy	GEOMORPHOLOGY	0169-555X	1872-695X		OCT 15	2012	171		114	126		10.1016/j.geomorph.2012.05.011	WOS:000309093400010
J	Arrigo, N; Albert, LP; Mickelson, PG; Barker, MS	Arrigo, Nils; Albert, Loren P.; Mickelson, Pascal G.; Barker, Michael S.	Quantitative visualization of biological data in Google Earth using R2G2, an R CRAN package	MOLECULAR ECOLOGY RESOURCES	1755-098X			NOV	2012	12	6	1177	1179		10.1111/1755-0998.12012	WOS:000309739700024	22994899
J	Groen, TA; Fanta, HG; Hinkov, G; Velichkov, I; Van Duren, I; Zlatanov, T	Groen, Thomas A.; Fanta, Hailemariam G.; Hinkov, Georgi; Velichkov, Ivaylo; Van Duren, Iris; Zlatanov, Tzvetan	Tree Line Change Detection Using Historical Hexagon Mapping Camera Imagery and Google Earth Data	GISCIENCE & REMOTE SENSING	1548-1603	1943-7226		NOV-DEC	2012	49	6	933	943		10.2747/1548-1603.49.6.933	WOS:000311832800008
J	Fischer, CMG; Baldi, G; Codesido, M; Bilenca, D	Gonzalez Fischer, Carlos M.; Baldi, German; Codesido, Mariano; Bilenca, David	Seasonal variations in small mammal-landscape associations in temperate agroecosystems: a study case in Buenos Aires province, central Argentina	MAMMALIA	0025-1461	1864-1547		NOV	2012	76	4	399	406		10.1515/mammalia-2011-0113	WOS:000311138900007
J	Wilson, MW	Wilson, Matthew W.	Location-based services, conspicuous mobility, and the location-aware future	GEOFORUM	0016-7185	1872-9398		NOV	2012	43	6	1266	1275		10.1016/j.geoforum.2012.03.014	WOS:000312921100023
J	Rossetti, DF; Bertani, TC; Zani, H; Cremon, EH; Hayakawa, EH	Rossetti, D. F.; Bertani, T. C.; Zani, H.; Cremon, E. H.; Hayakawa, E. H.	Late Quaternary sedimentary dynamics in Western Amazonia: Implications for the origin of open vegetation/forest contrasts	GEOMORPHOLOGY	0169-555X	1872-695X		DEC 1	2012	177		74	92		10.1016/j.geomorph.2012.07.015	WOS:000311462500007
J	Ernoul, L; Sandoz, A; Fellague, A	Ernoul, L.; Sandoz, A.; Fellague, A.	The evolution of two great Mediterranean Deltas: Remote sensing to visualize the evolution of habitats and land use in the Gediz and Rhone Deltas	OCEAN & COASTAL MANAGEMENT	0964-5691	1873-524X		DEC	2012	69		111	117		10.1016/j.ocecoaman.2012.07.026	WOS:000311467500011
J	Serin, E; Adali, SH; Balcisoy, S	Serin, Ekrem; Adali, Serdar Hasan; Balcisoy, Selim	Automatic path generation for terrain navigation	COMPUTERS & GRAPHICS-UK	0097-8493	1873-7684		DEC	2012	36	8	1013	1024		10.1016/j.cag.2012.08.006	WOS:000313766500013
J	Harris, R	Harris, Ray	Reflections on the value of ethics in relation to Earth observation	INTERNATIONAL JOURNAL OF REMOTE SENSING	0143-1161				2013	34	4	1207	1219		10.1080/01431161.2012.718466	WOS:000310208000012
J	Butt, MJ; Umar, M; Qamar, R	Butt, Mohsin Jamil; Umar, Muhammad; Qamar, Raheel	Landslide dam and subsequent dam-break flood estimation using HEC-RAS model in Northern Pakistan	NATURAL HAZARDS	0921-030X	1573-0840		JAN	2013	65	1	241	254		10.1007/s11069-012-0361-8	WOS:000312087100013
J	Akbar, M; Aliabadi, S; Patel, R; Watts, M	Akbar, Muhammad; Aliabadi, Shahrouz; Patel, Reena; Watts, Marvin	A fully automated and integrated multi-scale forecasting scheme for emergency preparedness	ENVIRONMENTAL MODELLING & SOFTWARE	1364-8152	1873-6726		JAN	2013	39		24	38		10.1016/j.envsoft.2011.12.006	WOS:000312517200003
J	Pertille, J; Hartmann, LA; Duarte, SK; Arena, K; Rosa, MLCC; Barboza, EG	Pertille, J.; Hartmann, L. A.; Duarte, S. K.; Arena, K.; Rosa, M. L. C. C.; Barboza, E. G.	Gossan characterization in the Quarai and Los Catalanes amethyst geode districts (Brazil and Uruguay), Parana volcanic province, using rock geochemistry and gamma-spectrometry	JOURNAL OF GEOCHEMICAL EXPLORATION	0375-6742	1879-1689		JAN	2013	124		127	139		10.1016/j.gexplo.2012.08.017	WOS:000313930300011
J	Griffin, C; Ellis, D; Beavis, S; Zoleta-Nantes, D	Griffin, Christina; Ellis, David; Beavis, Sara; Zoleta-Nantes, Doracie	Coastal resources, livelihoods and the 2004 Indian Ocean tsunami in Aceh, Indonesia	OCEAN & COASTAL MANAGEMENT	0964-5691	1873-524X		JAN	2013	71		176	186		10.1016/j.ocecoaman.2012.10.017	WOS:000314076300020
J	Kassab, C; Wang, J; Harbor, J	Kassab, Christine; Wang, Jie; Harbor, Jon	Glacial geomorphology of the Dalijia Shan region, northeastern Tibetan Plateau	JOURNAL OF MAPS	1744-5647				2013	9	1	98	105		10.1080/17445647.2012.754729	WOS:000316178600014
J	Karymbalis, E; Papanastassiou, D; Gaki-Papanastassiou, K; Tsanakas, K; Maroukian, H	Karymbalis, Efthimios; Papanastassiou, Dimitrios; Gaki-Papanastassiou, Kalliopi; Tsanakas, Konstantinos; Maroukian, Hampik	Geomorphological study of Cephalonia Island, Ionian Sea, Western Greece	JOURNAL OF MAPS	1744-5647				2013	9	1	121	134		10.1080/17445647.2012.758423	WOS:000316178600017
J	Kuok, KK; Ziet, LZ; PoChan, C	Kuok, Kuok King; Ziet, Liew Zun; PoChan, Chiu	Flood map development by coupling satellite maps and three-dimensional drafting software: Case study of the Sarawak River Basin	WATER SA	0378-4738	1816-7950		JAN	2013	39	1	175	181		10.4314/wsa.v39i1.18	WOS:000316185500018
J	Jacobson, AP; Cattau, ME; Riggio, JS; Petracca, LS; Fedak, DA	Jacobson, Andrew P.; Cattau, Megan E.; Riggio, Jason S.; Petracca, Lisanne S.; Fedak, Derek A.	Distribution and abundance of lions in northwest Tete Province, Mozambique	TROPICAL CONSERVATION SCIENCE	1940-0829				2013	6	1	87	107		10.1177/194008291300600110	WOS:000316728100007
J	Johnson, DC; Feldacker, C; Tweya, H; Phiri, S; Hosseinipour, MC	Johnson, D. C.; Feldacker, C.; Tweya, H.; Phiri, S.; Hosseinipour, M. C.	Factors associated with timely initiation of antiretroviral therapy in two HIV clinics in Lilongwe, Malawi	INTERNATIONAL JOURNAL OF STD & AIDS	0956-4624	1758-1052		JAN	2013	24	1	42	49		10.1177/0956462412472312	WOS:000318203300007	23467293
J	Heymsfield, E; Kuss, M	Heymsfield, Ernie; Kuss, Mark	Implementing GigaPan Technology into an Airport's Foreign Object Debris Management Program	TRANSPORTATION RESEARCH RECORD	0361-1981	2169-4052			2013		2336	55	62		10.3141/2336-07	WOS:000329838100007
J	Daniello, A; Cristino, D; Gabler, HC	Daniello, Allison; Cristino, Danielle; Gabler, Hampton C.	Relationshop Between Rider Trajectory and Injury Outcome in Motorcycle-to-Barrier Crashes	TRANSPORTATION RESEARCH RECORD	0361-1981	2169-4052			2013		2388	47	53		10.3141/2388-07	WOS:000334148400008
J	Wampler, PJ; Rediske, RR; Molla, AR	Wampler, Peter J.; Rediske, Richard R.; Molla, Azizur R.	Using ArcMap, Google Earth, and Global Positioning Systems to select and locate random households in rural Haiti	INTERNATIONAL JOURNAL OF HEALTH GEOGRAPHICS	1476-072X			JAN 18	2013	12				3	10.1186/1476-072X-12-3	WOS:000315493300001	23331997
J	Da Silva, HR; Alves-Silva, R	Da Silva, Helio Ricardo; Alves-Silva, Ricardo	Predictive-like distribution mapping using Google Earth: Reassessment of the distribution of the bromeligenous frog, Scinax v-signatus (Anura: Hylidae)	ZOOTAXA	1175-5326	1175-5334		JAN 29	2013	3609	2	213	222		10.11646/zootaxa.3609.2.7	WOS:000314846100007	24699583
J	Qi, F; Du, F	Qi, Feng; Du, Fei	Trajectory Data Analyses for Pedestrian Space-time Activity Study	JOVE-JOURNAL OF VISUALIZED EXPERIMENTS	1940-087X			FEB	2013		72			e50130	10.3791/50130	WOS:000209226500028	23462533
J	Graham, S; Hewitt, L	Graham, Stephen; Hewitt, Lucy	Getting off the ground: On the politics of urban verticality	PROGRESS IN HUMAN GEOGRAPHY	0309-1325	1477-0288		FEB	2013	37	1	72	92		10.1177/0309132512443147	WOS:000313734800005
J	Polczynski, M; Polczynski, M	Polczynski, Michael; Polczynski, Mark	A Microsoft Excel Application for Automatically Building Historical Geography GIS Maps	TRANSACTIONS IN GIS	1361-1682			FEB	2013	17	1	148	157		10.1111/tgis.12002	WOS:000314493800009
J	Fritz, S; See, L; van der Velde, M; Nalepa, RA; Perger, C; Schill, C; McCallum, I; Schepaschenko, D; Kraxner, F; Cai, XM; Zhang, X; Ortner, S; Hazarika, R; Cipriani, A; Di Bella, C; Rabia, AH; Garcia, A; Vakolyuk, M; Singha, K; Beget, ME; Erasmi, S; Albrecht, F; Shaw, B; Obersteiner, M	Fritz, Steffen; See, Linda; van der Velde, Marijn; Nalepa, Rachel A.; Perger, Christoph; Schill, Christian; McCallum, Ian; Schepaschenko, Dmitry; Kraxner, Florian; Cai, Ximing; Zhang, Xiao; Ortner, Simone; Hazarika, Rubul; Cipriani, Anna; Di Bella, Carlos; Rabia, Ahmed H.; Garcia, Alfredo; Vakolyuk, Mar'yana; Singha, Kuleswar; Beget, Maria E.; Erasmi, Stefan; Albrecht, Franziska; Shaw, Brian; Obe…	Downgrading Recent Estimates of Land Available for Biofuel Production	ENVIRONMENTAL SCIENCE & TECHNOLOGY	0013-936X	1520-5851		FEB 5	2013	47	3	1688	1694		10.1021/es303141h	WOS:000314675500065	23308357
J	Frankl, A; Zwertvaegher, A; Poesen, J; Nyssen, J	Frankl, Amaury; Zwertvaegher, Ann; Poesen, Jean; Nyssen, Jan	Transferring Google Earth observations to GIS-software: example from gully erosion study	INTERNATIONAL JOURNAL OF DIGITAL EARTH	1753-8947			MAR 1	2013	6	2	196	201		10.1080/17538947.2012.744777	WOS:000314913500006
J	Edwards, N; Hooper, P; Trapp, GSA; Bull, F; Boruff, B; Giles-Corti, B	Edwards, Nicole; Hooper, Paula; Trapp, Georgina S. A.; Bull, Fiona; Boruff, Bryan; Giles-Corti, Billie	Development of a Public Open Space Desktop Auditing Tool (POSDAT): A remote sensing approach	APPLIED GEOGRAPHY	0143-6228	1873-7730		MAR	2013	38		22	30		10.1016/j.apgeog.2012.11.010	WOS:000315248000003
J	Kessler, PD; Killough, BD; Gowda, S; Williams, BR; Chander, G; Qu, M	Kessler, Paul D.; Killough, Brian D.; Gowda, Sanjay; Williams, Brian R.; Chander, Gyanesh; Qu, Min	CEOS Visualization Environment (COVE) Tool for Intercalibration of Satellite Instruments	IEEE TRANSACTIONS ON GEOSCIENCE AND REMOTE SENSING	0196-2892			MAR	2013	51	3	1081	1087		10.1109/TGRS.2012.2235841	WOS:000315725900003
J	Chen, YW; Yap, KH; Lee, JY	Chen, Yu-Wen; Yap, Ko-Hua; Lee, Joey Ying	Tianditu: China's first official online mapping service	MEDIA CULTURE & SOCIETY	0163-4437	1460-3675		MAR	2013	35	2	234	249		10.1177/0163443712468776	WOS:000317360400005
J	Macharelli, CA; Schellini, SA; Opromolla, PA; Dalben, I	Macharelli, Carlos Alberto; Schellini, Silvana Artioli; Opromolla, Paula Araujo; Dalben, Ivete	Spatial distribution of trachoma cases in the City of Bauru, State of Sao Paulo, Brazil, detected in 2006: defining key areas for improvement of health resources	REVISTA DA SOCIEDADE BRASILEIRA DE MEDICINA TROPICAL	0037-8682			MAR-APR	2013	46	2	190	195		10.1590/0037-8682-1632-2013	WOS:000319625400013	23559341
J	Andriani, E; Brattoli, M; Buono, P; de Gennaro, G; de Gennaro, L	Andriani, Eleonora; Brattoli, Magda; Buono, Paolo; de Gennaro, Gianluigi; de Gennaro, Lucrezia	DEVELOPMENT OF A TOOL FOR INDUSTRIAL ATMOSPHERIC EMISSION MANAGEMENT IN THE APULIA REGION	ENVIRONMENTAL ENGINEERING AND MANAGEMENT JOURNAL	1582-9596	1843-3707		MAR	2013	12	3	429	434			WOS:000320144200002
J	Lee, J	Lee, Jacqueline	A survey of transverse drainages in the Susquehanna River basin, Pennsylvania	GEOMORPHOLOGY	0169-555X	1872-695X		MAR 15	2013	186		50	67		10.1016/j.geomorph.2012.12.022	WOS:000315974400005
J	Zhang, ZY; Tong, XN; McDonnell, KT; Zelenyuk, A; Imre, D; Mueller, K	Zhang, Zhiyuan; Tong, Xiaonan; McDonnell, Kevin T.; Zelenyuk, Alla; Imre, Dan; Mueller, Klaus	An Interactive Visual Analytics Framework for Multi-Field Data in a Geo-Spatial Context	TSINGHUA SCIENCE AND TECHNOLOGY	1007-0214	1878-7606		APR	2013	18	2	111	124		10.1109/TST.2013.6509095	WOS:000209529100002
J	Hritz, C	Hritz, Carrie	A malarial-ridden swamp: using Google Earth Pro and Corona to access the southern Balikh valley, Syria	JOURNAL OF ARCHAEOLOGICAL SCIENCE	0305-4403	1095-9238		APR	2013	40	4	1975	1987		10.1016/j.jas.2012.11.017	WOS:000316709300033
J	Tsai, VJD; Chang, CT	Tsai, Victor J. D.; Chang, Chun-Ting	Three-dimensional positioning from Google street view panoramas	IET IMAGE PROCESSING	1751-9659	1751-9667		APR	2013	7	3	229	239		10.1049/iet-ipr.2012.0323	WOS:000321749000006
J	Gong, P; Wang, J; Yu, L; Zhao, YC; Zhao, YY; Liang, L; Niu, ZG; Huang, XM; Fu, HH; Liu, S; Li, CC; Li, XY; Fu, W; Liu, CX; Xu, Y; Wang, XY; Cheng, Q; Hu, LY; Yao, WB; Zhang, H; Zhu, P; Zhao, ZY; Zhang, HY; Zheng, YM; Ji, LY; Zhang, YW; Chen, H; Yan, A; Guo, JH; Yu, L; Wang, L; Liu, XJ; Shi, TT; Zhu, MH; Chen, YL; Yang, GW; Tang, P; Xu, B; Giri, C; Clinton, N; Zhu, ZL; Chen, J; Chen, J	Gong, Peng; Wang, Jie; Yu, Le; Zhao, Yongchao; Zhao, Yuanyuan; Liang, Lu; Niu, Zhenguo; Huang, Xiaomeng; Fu, Haohuan; Liu, Shuang; Li, Congcong; Li, Xueyan; Fu, Wei; Liu, Caixia; Xu, Yue; Wang, Xiaoyi; Cheng, Qu; Hu, Luanyun; Yao, Wenbo; Zhang, Han; Zhu, Peng; Zhao, Ziying; Zhang, Haiying; Zheng, Yaomin; Ji, Luyan; Zhang, Yawen; Chen, Han; Yan, An; Guo, Jianhong; Yu, Liang; Wang, Lei; Liu, Xiaoju…	Finer resolution observation and monitoring of global land cover: first mapping results with Landsat TM and ETM+ data	INTERNATIONAL JOURNAL OF REMOTE SENSING	0143-1161	1366-5901		APR 10	2013	34	7	2607	2654		10.1080/01431161.2012.748992	WOS:000315722200021
J	Curtis, A; Blackburn, JK; Widmer, JM; Morris, JG	Curtis, Andrew; Blackburn, Jason K.; Widmer, Jocelyn M.; Morris, J. Glenn, Jr.	A ubiquitous method for street scale spatial data collection and analysis in challenging urban environments: mapping health risks using spatial video in Haiti	INTERNATIONAL JOURNAL OF HEALTH GEOGRAPHICS	1476-072X			APR 15	2013	12				21	10.1186/1476-072X-12-21	WOS:000320711500001	23587358
J	Rajendran, S; Nasir, S	Rajendran, Sankaran; Nasir, Sobhi	ASTER spectral analysis of ultramafic lamprophyres (carbonatites and aillikites) within the Batain Nappe, northeastern margin of Oman: a proposal developed for spectral absorption	INTERNATIONAL JOURNAL OF REMOTE SENSING	0143-1161	1366-5901		APR 20	2013	34	8	2763	2795		10.1080/01431161.2012.748941	WOS:000316393800007
J	Lieskovsky, J; Kanka, R; Bezak, P; Stefunkova, D; Petrovic, F; Dobrovodska, M	Lieskovsky, Juraj; Kanka, Robert; Bezak, Peter; Stefunkova, Dagmar; Petrovic, Frantisek; Dobrovodska, Marta	Driving forces behind vineyard abandonment in Slovakia following the move to a market-oriented economy	LAND USE POLICY	0264-8377	1873-5754		MAY	2013	32		356	365		10.1016/j.landusepol.2012.11.010	WOS:000315426600037
J	Patel, DP; Srivastava, PK	Patel, Dhruvesh P.; Srivastava, Prashant K.	Flood Hazards Mitigation Analysis Using Remote Sensing and GIS: Correspondence with Town Planning Scheme	WATER RESOURCES MANAGEMENT	0920-4741	1573-1650		MAY	2013	27	7	2353	2368		10.1007/s11269-013-0291-6	WOS:000318004800028
J	Kempe, S; Al-Malabeh, A	Kempe, Stephan; Al-Malabeh, Ahmad	Desert kites in Jordan and Saudi Arabia: Structure, statistics and function, a Google Earth study	QUATERNARY INTERNATIONAL	1040-6182	1873-4553		MAY 29	2013	297		126	146		10.1016/j.quaint.2013.02.013	WOS:000319711300012
J	Mills, MSL; Melo, M; Vaz, A	Mills, Michael S. L.; Melo, Martim; Vaz, Alexandre	The Namba mountains: new hope for Afromontane forest birds in Angola	BIRD CONSERVATION INTERNATIONAL	0959-2709	1474-0001		JUN	2013	23	2	159	167		10.1017/S095927091200024X	WOS:000319126200006
J	Zohar, I; Ailon, A	Zohar, Ilan; Ailon, Amit	Tracking Controllers for Aerial Vehicles Subject to Restricted Inputs and Wind Perturbations	INTERNATIONAL JOURNAL OF CONTROL AUTOMATION AND SYSTEMS	1598-6446	2005-4092		JUN	2013	11	3	433	441		10.1007/s12555-012-0371-z	WOS:000319548000001
J	Adediji, A; Jeje, LK; Ibitoye, MO	Adediji, A.; Jeje, L. K.; Ibitoye, M. O.	Urban development and informal drainage patterns: Gully dynamics in Southwestern Nigeria	APPLIED GEOGRAPHY	0143-6228	1873-7730		JUN	2013	40		90	102		10.1016/j.apgeog.2013.01.012	WOS:000319642100011
J	Boyce, J	Boyce, J.	The Newer Volcanics Province of southeastern Australia: a new classification scheme and distribution map for eruption centres	AUSTRALIAN JOURNAL OF EARTH SCIENCES	0812-0099	1440-0952		JUN 1	2013	60	4	449	462		10.1080/08120099.2013.806954	WOS:000322151000002
J	Wang, YQ; Jiang, X; Yu, B; Jiang, M	Wang, Yueqing; Jiang, Xin; Yu, Bin; Jiang, Ming	A Hierarchical Bayesian Approach for Aerosol Retrieval Using MISR Data	JOURNAL OF THE AMERICAN STATISTICAL ASSOCIATION	0162-1459	1537-274X		JUN	2013	108	502	483	493		10.1080/01621459.2013.796834	WOS:000321727700010
J	Torres-Sanchez, S; Medina-Medina, N; Gignoux, C; Abad-Grau, MM; Gonzalez-Burchard, E	Torres-Sanchez, Sergio; Medina-Medina, Nuria; Gignoux, Chris; Abad-Grau, Maria M.; Gonzalez-Burchard, Esteban	GeneOnEarth: Fitting Genetic PC Plots on the Globe	IEEE-ACM TRANSACTIONS ON COMPUTATIONAL BIOLOGY AND BIOINFORMATICS	1545-5963	1557-9964		JUL-AUG	2013	10	4	1009	1016		10.1109/TCBB.2013.81	WOS:000328640700017	24334393
J	Dou, CY; Zhang, XD; Kim, HJ; Ranganathan, J; Olsen, D; Guo, HD	Dou, Changyong; Zhang, Xiaodong; Kim, Hojin; Ranganathan, Jaganathan; Olsen, Doug; Guo, Huadong	Geolocation Algorithm for Earth Observation Sensors Onboard the International Space Station	PHOTOGRAMMETRIC ENGINEERING AND REMOTE SENSING	0099-1112	2374-8079		JUL	2013	79	7	625	637		10.14358/PERS.79.7.625	WOS:000330093100004
J	Wongkoon, S; Jaroensutasinee, M; Jaroensutasinee, K	Wongkoon, Siriwan; Jaroensutasinee, Mullica; Jaroensutasinee, Krisanadej	THE MOSQUITO ONLINE ADVANCED ANALYTIC SERVICE: A CASE STUDY FOR SCHOOL RESEARCH PROJECTS IN THAILAND	SOUTHEAST ASIAN JOURNAL OF TROPICAL MEDICINE AND PUBLIC HEALTH	0125-1562			JUL	2013	44	4	574	585			WOS:000323406500005	24050090
J	Wang, DY; Lee, MH; Sun, CT	Wang, Dai-Yi; Lee, Mei-Hsuan; Sun, Chuen-Tsai	Effects of Thinking Style and Spatial Ability on Anchoring Behavior in Geographic Information Systems	EDUCATIONAL TECHNOLOGY & SOCIETY	1176-3647	1436-4522		JUL	2013	16	3	1	13			WOS:000324482100001
J	Zhang, Q; Seto, KC	Zhang, Qian; Seto, Karen C.	Can Night-Time Light Data Identify Typologies of Urbanization? A Global Assessment of Successes and Failures	REMOTE SENSING	2072-4292			JUL	2013	5	7	3476	3494		10.3390/rs5073476	WOS:000328626000017
J	Fisher, GB; Bookhagen, B; Amos, CB	Fisher, G. Burch; Bookhagen, Bodo; Amos, Colin B.	Channel planform geometry and slopes from freely available high-spatial resolution imagery and DEM fusion: Implications for channel width scalings, erosion proxies, and fluvial signatures in tectonically active landscapes	GEOMORPHOLOGY	0169-555X	1872-695X		JUL 15	2013	194		46	56		10.1016/j.geomorph.2013.04.011	WOS:000320212700005
J	Comber, A; See, L; Fritz, S; Van der Velde, M; Perger, C; Foody, G	Comber, Alexis; See, Linda; Fritz, Steffen; Van der Velde, Marijn; Perger, Christoph; Foody, Giles	Using control data to determine the reliability of volunteered geographic information about land cover	INTERNATIONAL JOURNAL OF APPLIED EARTH OBSERVATION AND GEOINFORMATION	0303-2434			AUG	2013	23		37	48		10.1016/j.jag.2012.11.002	WOS:000317159800004
J	England, PC; Walker, RT; Fu, BH; Floyd, MA	England, Philip C.; Walker, Richard T.; Fu, Bihong; Floyd, Michael A.	A bound on the viscosity of the Tibetan crust from the horizontality of palaeolake shorelines	EARTH AND PLANETARY SCIENCE LETTERS	0012-821X	1385-013X		AUG 1	2013	375		44	56		10.1016/j.epsl.2013.05.001	WOS:000324847300004
J	Pandey, B; Joshi, PK; Seto, KC	Pandey, Bhartendu; Joshi, P. K.; Seto, Karen C.	Monitoring urbanization dynamics in India using DMSP/OLS night time lights and SPOT-VGT data	INTERNATIONAL JOURNAL OF APPLIED EARTH OBSERVATION AND GEOINFORMATION	0303-2434			AUG	2013	23		49	61		10.1016/j.jag.2012.11.005	WOS:000317159800005
J	Glow, SD; Colucci, VJ; Allington, DR; Noonan, CW; Hall, EC	Glow, Steven D.; Colucci, Vincent J.; Allington, Douglas R.; Noonan, Curtis W.; Hall, Earl C.	Managing Multiple-Casualty Incidents: A Rural Medical Preparedness Training Assessment	PREHOSPITAL AND DISASTER MEDICINE	1049-023X	1945-1938		AUG	2013	28	4	334	341		10.1017/S1049023X13000423	WOS:000445143300004	23594616
J	Hermuche, PM; Vieira, DLM; Sano, EE	Hermuche, Potira Meirelles; Mascia Vieira, Daniel Luis; Sano, Edson Eyji	Modeling tree cover changes in a pasture-dominated landscape by adopting silvopastoral practices in a dry forest region in Central Brazil	AGROFORESTRY SYSTEMS	0167-4366	1572-9680		AUG	2013	87	4	881	890		10.1007/s10457-013-9604-2	WOS:000321519300013
J	Zhang, SX	Zhang, Shunxin	Ordovician conodont biostratigraphy and redefinition of the age of lithostratigraphic units on northeastern Melville Peninsula, Nunavut	CANADIAN JOURNAL OF EARTH SCIENCES	0008-4077			AUG	2013	50	8	808	825		10.1139/cjes-2013-0009	WOS:000321565700002
J	Slaby, P; Tomanova, K; Vacha, M	Slaby, P.; Tomanova, K.; Vacha, M.	Cattle on pastures do align along the North-South axis, but the alignment depends on herd density	JOURNAL OF COMPARATIVE PHYSIOLOGY A-NEUROETHOLOGY SENSORY NEURAL AND BEHAVIORAL PHYSIOLOGY	0340-7594	1432-1351		AUG	2013	199	8	695	701		10.1007/s00359-013-0827-5	WOS:000322028800003	23700176
J	Shealer, DA; Alexander, MJ	Shealer, David A.; Alexander, Michael J.	Use of aerial imagery to assess habitat suitability and predict site occupancy for a declining wetland-dependent bird	WETLANDS ECOLOGY AND MANAGEMENT	0923-4861			AUG	2013	21	4	289	296		10.1007/s11273-013-9300-z	WOS:000322327600005
J	Suvires, GM	Mabel Suvires, Graciela	Tectonic geomorphology and relief evolution in a sector of the Sierra Chica de Zonda western foothills, eastern Precordillera, Argentina	REVISTA MEXICANA DE CIENCIAS GEOLOGICAS	1026-8774			AUG	2013	30	2	324	335			WOS:000322801200006
J	Heinlein, SNC	Heinlein, Sarah N. Cervera	Spatial patterns of geomorphic surface features and fault morphology based on diffusion equation modeling of the Kumroch Fault Kamchatka Peninsula, Russia	JOURNAL OF VOLCANOLOGY AND GEOTHERMAL RESEARCH	0377-0273	1872-6097		AUG 1	2013	263		209	223		10.1016/j.jvolgeores.2013.01.017	WOS:000326365600015
J	Li, S; Xie, YC	Li, Shuang; Xie, Yichun	Investigating Coupled Impacts of Climate Change and Socioeconomic Transformation on Desertification by Using Multitemporal Landsat Images: A Case Study in Central Xilingol, China	IEEE GEOSCIENCE AND REMOTE SENSING LETTERS	1545-598X	1558-0571		SEP	2013	10	5	1244	1248		10.1109/LGRS.2013.2257158	WOS:000320993900057
J	Bowers, T	Bowers, Tom	Mountaintop Removal as a Case Study: The Possibilities for Public Advocacy through Virtual Toxic Tours	ENVIRONMENTAL COMMUNICATION-A JOURNAL OF NATURE AND CULTURE	1752-4032			SEP 1	2013	7	3	372	390		10.1080/17524032.2013.807860	WOS:000322696100004
J	Liu, Y; Zhao, L	Liu, Yu; Zhao, Liang	The preliminary analysis of sunshine durations with meteorological data for the Chinese Giant Solar Telescope site survey	MONTHLY NOTICES OF THE ROYAL ASTRONOMICAL SOCIETY	0035-8711			SEP	2013	434	2	1674	1680		10.1093/mnras/stt1123	WOS:000323638200058
J	Goudie, A	Goudie, Alice	Characterising the distribution and morphology of creeks and pans on salt marshes in England and Wales using Google Earth	ESTUARINE COASTAL AND SHELF SCIENCE	0272-7714	1096-0015		SEP 1	2013	129		112	123		10.1016/j.ecss.2013.05.015	WOS:000323361400014
J	Gordon, DLA; Janzen, M	Gordon, David L. A.; Janzen, Mark	SUBURBAN NATION? ESTIMATING THE SIZE OF CANADA'S SUBURBAN POPULATION	JOURNAL OF ARCHITECTURAL AND PLANNING RESEARCH	0738-0895			FAL	2013	30	3	197	220			WOS:000329956700002
J	Pond, BS	Pond, Bob S.	Malaria indicator surveys demonstrate a markedly lower prevalence of malaria in large cities of sub-Saharan Africa	MALARIA JOURNAL	1475-2875			SEP 10	2013	12				313	10.1186/1475-2875-12-313	WOS:000324753300001	24021162
J	Tian, P; Zhao, GJ; Mu, XM; Wang, F; Gao, P; Mi, ZJ	Tian, Peng; Zhao, Guangju; Mu, Xingmin; Wang, Fei; Gao, Peng; Mi, Zhijuan	Check dam identification using multisource data and their effects on streamflow and sediment load in a Chinese Loess Plateau catchment	JOURNAL OF APPLIED REMOTE SENSING	1931-3195			SEP 24	2013	7				73697	10.1117/1.JRS.7.073697	WOS:000324727800002
J	Liu, XJ; Lai, ZP; Zeng, FM; Madsen, DB; E, CY	Liu, Xiang-Jun; Lai, Zhong-Ping; Zeng, Fang-Ming; Madsen, David B.; E, Chong-Yi	Holocene lake level variations on the Qinghai-Tibetan Plateau	INTERNATIONAL JOURNAL OF EARTH SCIENCES	1437-3254	1437-3262		OCT	2013	102	7	2007	2016		10.1007/s00531-013-0896-2	WOS:000324571000017
J	Stroeven, AP; Hattestrand, C; Heyman, J; Kleman, J; Moren, BM	Stroeven, Arjen P.; Hattestrand, Clas; Heyman, Jakob; Kleman, Johan; Moren, Bjorn M.	Glacial geomorphology of the Tian Shan	JOURNAL OF MAPS	1744-5647			OCT 1	2013	9	4	505	512		10.1080/17445647.2013.820879	WOS:000325090600005
J	Paredes-Hernandez, CU; Salinas-Castillo, WE; Guevara-Cortina, F; Martinez-Becerra, X	Uriel Paredes-Hernandez, Cutberto; Enrique Salinas-Castillo, Wilver; Guevara-Cortina, Francisco; Martinez-Becerra, Xicotencatl	HORIZONTAL POSITIONAL ACCURACY OF GOOGLE EARTH'S IMAGERY OVER RURAL AREAS: A STUDY CASE IN TAMAULIPAS, MEXICO	BOLETIM DE CIENCIAS GEODESICAS	1982-2170			OCT-DEC	2013	19	4	588	601		10.1590/S1982-21702013000400005	WOS:000329449700005
J	Cracknell, AP; Kanniah, KD; Tan, KP; Wang, L	Cracknell, Arthur Philip; Kanniah, Kasturi Devi; Tan, Kian Pang; Wang, Lei	Evaluation of MODIS gross primary productivity and land cover products for the humid tropics using oil palm trees in Peninsular Malaysia and Google Earth imagery	INTERNATIONAL JOURNAL OF REMOTE SENSING	0143-1161	1366-5901		OCT 20	2013	34	20	7400	7423		10.1080/01431161.2013.820367	WOS:000322767600027
J	Frankl, A; Poesen, J; Haile, M; Deckers, J; Nyssen, J	Frankl, Amaury; Poesen, Jean; Haile, Mitiku; Deckers, Jozef; Nyssen, Jan	Quantifying long-term changes in gully networks and volumes in dryland environments: The case of Northern Ethiopia	GEOMORPHOLOGY	0169-555X	1872-695X		NOV 1	2013	201		254	263		10.1016/j.geomorph.2013.06.025	WOS:000326766500021
J	Garcia-Dorado, I; Demir, I; Aliaga, DG	Garcia-Dorado, Ignacio; Demir, Ilke; Aliaga, Daniel G.	Automatic urban modeling using volumetric reconstruction with surface graph cuts	COMPUTERS & GRAPHICS-UK	0097-8493	1873-7684		NOV	2013	37	7	896	910		10.1016/j.cag.2013.07.003	WOS:000325834400013
J	Lorenz, RD; Gasmi, N; Radebaugh, J; Barnes, JW; Ori, GG	Lorenz, Ralph D.; Gasmi, Nabil; Radebaugh, Jani; Barnes, Jason W.; Ori, Gian G.	Dunes on planet Tatooine: Observation of barchan migration at the Star Wars film set in Tunisia	GEOMORPHOLOGY	0169-555X	1872-695X		NOV 1	2013	201		264	271		10.1016/j.geomorph.2013.06.026	WOS:000326766500022
J	Hu, Q; Wu, WB; Xia, T; Yu, QY; Yang, P; Li, ZG; Song, Q	Hu, Qiong; Wu, Wenbin; Xia, Tian; Yu, Qiangyi; Yang, Peng; Li, Zhengguo; Song, Qian	Exploring the Use of Google Earth Imagery and Object-Based Methods in Land Use/Cover Mapping	REMOTE SENSING		2072-4292		NOV	2013	5	11	6026	6042		10.3390/rs5116026	WOS:000328626900029
J	Pinkerton, B; Rosu, A; Janssen, I; Pickett, W	Pinkerton, Bryn; Rosu, Andrei; Janssen, Ian; Pickett, William	Active Transportation Safety Features around Schools in Canada	INTERNATIONAL JOURNAL OF ENVIRONMENTAL RESEARCH AND PUBLIC HEALTH	1660-4601			NOV	2013	10	11	5711	5725		10.3390/ijerph10115711	WOS:000330520800024	24185844
J	Christidis, T; Law, J	Christidis, Tanya; Law, Jane	Mapping Ontario's Wind Turbines: Challenges and Limitations	ISPRS INTERNATIONAL JOURNAL OF GEO-INFORMATION	2220-9964			DEC	2013	2	4	1092	1105		10.3390/ijgi2041092	WOS:000209465900010
J	Wang, YS; Huynh, G; Williamson, C	Wang, Yansen; Huynh, Giap; Williamson, Chatt	Integration of Google Maps/Earth with microscale meteorology models and data visualization	COMPUTERS & GEOSCIENCES	0098-3004	1873-7803		DEC	2013	61		23	31		10.1016/j.cageo.2013.07.016	WOS:000327000100003
J	Martinez-Grana, AM; Goy, JL; Cimarra, CA	Martinez-Grana, A. M.; Goy, J. L.; Cimarra, C. A.	A virtual tour of geological heritage: Valourising geodiversity using Google Earth and QR code	COMPUTERS & GEOSCIENCES	0098-3004	1873-7803		DEC	2013	61		83	93		10.1016/j.cageo.2013.07.020	WOS:000327000100009
J	Kremer, P; Hamstead, ZA; McPhearson, T	Kremer, Peleg; Hamstead, Zoe A.; McPhearson, Timon	A social-ecological assessment of vacant lots in New York City	LANDSCAPE AND URBAN PLANNING	0169-2046	1872-6062		DEC	2013	120		218	233		10.1016/j.landurbplan.2013.05.003	WOS:000327419200020
J	Hong, C	Hong, Christine	THE MIRROR OF NORTH KOREAN HUMAN RIGHTS Technologies of Liberation, Technologies of War	CRITICAL ASIAN STUDIES	1467-2715	1472-6033		DEC 1	2013	45	4	561	592		10.1080/14672715.2013.851152	WOS:000327833500003
J	Clarke, P; Gallagher, NA	Clarke, Philippa; Gallagher, Nancy Ambrose	Optimizing Mobility in Later Life: The Role of the Urban Built Environment for Older Adults Aging in Place	JOURNAL OF URBAN HEALTH-BULLETIN OF THE NEW YORK ACADEMY OF MEDICINE	1099-3460	1468-2869		DEC	2013	90	6	997	1009		10.1007/s11524-013-9800-4	WOS:000328211700001	23592019
J	Savic, R; Ondrasek, G; Bezdan, A; Letic, L; Nikolic, V	Savic, Radovan; Ondrasek, Gabrijel; Bezdan, Atila; Letic, Ljubomir; Nikolic, Vesna	FLUVIAL DEPOSITION IN GROYNE FIELDS OF THE MIDDLE COURSE OF THE DANUBE RIVER	TEHNICKI VJESNIK-TECHNICAL GAZETTE	1330-3651	1848-6339		DEC	2013	20	6	979	983			WOS:000328961800008
J	Bayas, JCL; Marohn, C; Cadisch, G	Bayas, J. C. Laso; Marohn, C.; Cadisch, G.	Tsunami in the Seychelles: Assessing mitigation mechanisms	OCEAN & COASTAL MANAGEMENT	0964-5691	1873-524X		DEC	2013	86		42	52		10.1016/j.ocecoaman.2013.10.004	WOS:000329552800005
J	Dhillon, SK; Chiew, SL; Leow, LK; Sidhu, AS; Shuhaimi, NI; Leong, YM; Chong, VC	Dhillon, Sarinder Kaur; Chiew, S. L.; Leow, L. K.; Sidhu, Amandeep S.; Shuhaimi, N. I.; Leong, Y. M.; Chong, V. C.	A model of a digital biological ecosystem	SYSTEMATICS AND BIODIVERSITY	1477-2000	1478-0933		DEC 1	2013	11	4	425	435		10.1080/14772000.2013.856962	WOS:000329564800003
J	Diedrich, C	Diedrich, C.	Impact of the German Harz Mountain Weichselian ice-shield and valley glacier development onto Palaeolithic and megafauna disappearances	QUATERNARY SCIENCE REVIEWS	0277-3791			DEC 15	2013	82		167	198		10.1016/j.quascirev.2013.08.013	WOS:000329954300013
J	Osborn, TJ; Jones, PD	Osborn, T. J.; Jones, P. D.	The CRUTEM4 land-surface air temperature data set: construction, previous versions and dissemination via Google Earth	EARTH SYSTEM SCIENCE DATA	1866-3508	1866-3516			2014	6	1	61	68		10.5194/essd-6-61-2014	WOS:000356933700004
J	Rajendran, S; Nasir, S	Rajendran, Sankaran; Nasir, Sobhi	ASTER mapping of limestone formations and study of caves, springs and depressions in parts of Sultanate of Oman	ENVIRONMENTAL EARTH SCIENCES	1866-6280	1866-6299		JAN	2014	71	1	133	146		10.1007/s12665-013-2419-7	WOS:000329828900015
J	Zhao, YY; Gong, P; Yu, L; Hu, LY; Li, XY; Li, CC; Zhang, HY; Zheng, YM; Wang, J; Zhao, YC; Cheng, Q; Liu, CX; Liu, S; Wang, XY	Zhao, Yuanyuan; Gong, Peng; Yu, Le; Hu, Luanyun; Li, Xueyan; Li, Congcong; Zhang, Haiying; Zheng, Yaomin; Wang, Jie; Zhao, Yongchao; Cheng, Qu; Liu, Caixia; Liu, Shuang; Wang, Xiaoyi	Towards a common validation sample set for global land-cover mapping	INTERNATIONAL JOURNAL OF REMOTE SENSING	0143-1161	1366-5901			2014	35	13	4795	4814		10.1080/01431161.2014.930202	WOS:000340105700012
J	Vennari, C; Gariano, SL; Antronico, L; Brunetti, MT; Iovine, G; Peruccacci, S; Terranova, O; Guzzetti, F	Vennari, C.; Gariano, S. L.; Antronico, L.; Brunetti, M. T.; Iovine, G.; Peruccacci, S.; Terranova, O.; Guzzetti, F.	Rainfall thresholds for shallow landslide occurrence in Calabria, southern Italy	NATURAL HAZARDS AND EARTH SYSTEM SCIENCES	1561-8633				2014	14	2	317	330		10.5194/nhess-14-317-2014	WOS:000332336700012
J	Svenson, GJ	Svenson, Gavin J.	Revision of the Neotropical bark mantis genus Liturgusa Saussure, 1869 (Insecta, Mantodea, Liturgusini)	ZOOKEYS	1313-2989	1313-2970			2014		390	1	214		10.3897/zookeys.390.6661	WOS:000332937800001	24715776
J	Liew, TS; Vermeulen, JJ; bin Marzuki, ME; Schilthuizen, M	Liew, Thor-Seng; Vermeulen, Jaap Jan; bin Marzuki, Mohammad Effendi; Schilthuizen, Menno	A cybertaxonomic revision of the micro-landsnail genus Plectostoma Adam (Mollusca, Caenogastropoda, Diplommatinidae), from Peninsular Malaysia, Sumatra and Indochina	ZOOKEYS	1313-2989	1313-2970			2014		393	1	107		10.3897/zookeys.393.6717	WOS:000333339500001	24715783
J	Freeland, RS; Buschermohle, MJ; Nichols, WM	Freeland, R. S.; Buschermohle, M. J.; Nichols, W. M.	PRECISION AGRICULTURE: RTK BASE-TO-TRACTOR RANGE LIMITATIONS USING RF COMMUNICATION	APPLIED ENGINEERING IN AGRICULTURE	0883-8542	1943-7838		JAN	2014	30	1	97	104			WOS:000333869800013
J	Li, YA; Li, YK	Li, Yanan; Li, Yingkui	Topographic and geometric controls on glacier changes in the central Tien Shan, China, since the Little Ice Age	ANNALS OF GLACIOLOGY	0260-3055	1727-5644			2014	55	66	177	186		10.3189/2014AoG66A031	WOS:000336010200022
J	Kobayashi, T; Tsend-Ayush, J; Tateishi, R	Kobayashi, Toshiyuki; Tsend-Ayush, Javzandulam; Tateishi, Ryutaro	A New Tree Cover Percentage Map in Eurasia at 500 m Resolution Using MODIS Data	REMOTE SENSING		2072-4292		JAN	2014	6	1	209	232		10.3390/rs6010209	WOS:000335555900010
J	Fletcher, RS	Fletcher, Reginald S.	Employing spatial information technologies to monitor biological control of saltcedar in West Texas	GEOCARTO INTERNATIONAL	1010-6049	1752-0762			2014	29	3	332	347		10.1080/10106049.2013.768299	WOS:000338766200008
J	Tehrany, MS; Pradhan, B; Jebuv, MN	Tehrany, Mahyat Shafapour; Pradhan, Biswajeet; Jebuv, Mustafa Neamah	A comparative assessment between object and pixel-based classification approaches for land-use/land-cover mapping using SPOT 5 imagery	GEOCARTO INTERNATIONAL	1010-6049	1752-0762			2014	29	4	351	369		10.1080/10106049.2013.768300	WOS:000338767700002
J	Boyce, JA; Keays, RR; Nicholls, IA; Hayman, P	Boyce, J. A.; Keays, R. R.; Nicholls, I. A.; Hayman, P.	Eruption centres of the Hamilton area of the Newer Volcanics Province, Victoria, Australia: pinpointing volcanoes from a multifaceted approach to landform mapping	AUSTRALIAN JOURNAL OF EARTH SCIENCES	0812-0099	1440-0952			2014	61	5	735	754		10.1080/08120099.2014.923508	WOS:000340147900005
J	Salinas-Castillo, WE; Paredes-Hernandez, CU	Enrique Salinas-Castillo, Wilver; Uriel Paredes-Hernandez, Cutberto	Horizontal and vertical accuracy of Google Earth (R): comment on 'Positional accuracy of the Google Earth terrain model derived from stratigraphic unconformities in the Big Bend region, Texas, USA' by SC Benker, RP Langford and TL Pavlis	GEOCARTO INTERNATIONAL	1010-6049	1752-0762			2014	29	6	625	627		10.1080/10106049.2013.821176	WOS:000340244100004
J	Jones, K; Devillers, R; Bedard, Y; Schroth, O	Jones, Krista; Devillers, Rodolphe; Bedard, Yvan; Schroth, Olaf	Visualizing perceived spatial data quality of 3D objects within virtual globes	INTERNATIONAL JOURNAL OF DIGITAL EARTH	1753-8947	1753-8955			2014	7	10	771	788		10.1080/17538947.2013.783128	WOS:000340458700001
J	Roussel, N; Frappart, F; Ramillien, G; Darrozes, J; Desjardins, C; Gegout, P; Perosanz, F; Biancale, R	Roussel, N.; Frappart, F.; Ramillien, G.; Darrozes, J.; Desjardins, C.; Gegout, P.; Perosanz, F.; Biancale, R.	Simulations of direct and reflected wave trajectories for ground-based GNSS-R experiments	GEOSCIENTIFIC MODEL DEVELOPMENT	1991-959X	1991-9603			2014	7	5	2261	2279		10.5194/gmd-7-2261-2014	WOS:000344730900025
J	Uddin, FMJ; Asaeda, T; Rashid, MH	Uddin, F. M. Jamil; Asaeda, Takashi; Rashid, Md H.	LARGE-SCALE CHANGES OF THE FORESTATION IN RIVER CHANNEL BELOW THE DAMS IN SOUTHERN AFRICAN RIVERS: ASSESSMENT USING THE GOOGLE EARTH IMAGES	POLISH JOURNAL OF ECOLOGY	1505-2249				2014	62	4	607	623		10.3161/104.062.0407	WOS:000346950000001
J	Isabelle, V; Marielle, A; Basile, MB; Francois, MK; Geert, B; Eric, V; Marjolein, V; Jan, B	Isabelle, Vranken; Marielle, Adam; Basile, Mujinya Bazirake; Francois, Munyemba Kankumbi; Geert, Baert; Eric, Van Ranst; Marjolein, Visser; Jan, Bogaert	Termite mound identification through aerial photographic interpretation in Lubumbashi, Democratic Republic of the Congo: methodology evaluation	TROPICAL CONSERVATION SCIENCE	1940-0829				2014	7	4	733	746		10.1177/194008291400700411	WOS:000347644200011
J	Munoz-Cristobal, JA; Martinez-Mones, A; Asensio-Perez, JI; Villagra-Sobrino, SL; Hoyos-Torio, JE; Dimitriadis, Y	Munoz-Cristobal, Juan A.; Martinez-Mones, Alejandra; Asensio-Perez, Juan I.; Villagra-Sobrino, Sara L.; Hoyos-Torio, Javier E.; Dimitriadis, Yannis	City Ads: Embedding Virtual Worlds and Augmented Reality in Everyday Educational Practice	JOURNAL OF UNIVERSAL COMPUTER SCIENCE	0948-695X				2014	20	12	1670	1689			WOS:000347734300005
J	Zakerinejad, R; Marker, M	Zakerinejad, Reza; Marker, Michael	PREDICTION OF GULLY EROSION SUSCEPTIBILITIES USING DETAILED TERRAIN ANALYSIS AND MAXIMUM ENTROPY MODELING: A CASE STUDY IN THE MAZAYEJAN PLAIN, SOUTHWEST IRAN	GEOGRAFIA FISICA E DINAMICA QUATERNARIA	0391-9838	1724-4781			2014	37	1	67	76		10.4461/GFDQ.2014.37.7	WOS:000348837600007
J	She, JF; Zhang, YF; Li, XG; Chen, YN	She, Jiangfeng; Zhang, Yufang; Li, Xingong; Chen, Yaning	Changes in snow and glacier cover in an arid watershed of the western Kunlun Mountains using multisource remote-sensing data	INTERNATIONAL JOURNAL OF REMOTE SENSING	0143-1161	1366-5901		JAN 2	2014	35	1	234	252		10.1080/01431161.2013.866296	WOS:000328812200016
J	Dong, JW; Xiao, XM; Sheldon, S; Biradar, C; Zhang, GL; Duong, ND; Hazarika, M; Wikantika, K; Takeuhci, W; Moore, B	Dong, Jinwei; Xiao, Xiangming; Sheldon, Sage; Biradar, Chandrashekhar; Zhang, Geli; Nguyen Dinh Duong; Hazarika, Manzul; Wikantika, Ketut; Takeuhci, Wataru; Moore, Berrien, III	A 50-m Forest Cover Map in Southeast Asia from ALOS/PALSAR and Its Application on Forest Fragmentation Assessment	PLOS ONE	1932-6203			JAN 22	2014	9	1			e85801	10.1371/journal.pone.0085801	WOS:000330283100075	24465714
J	Orgel, C; Kereszturi, A; Vaczi, T; Groemer, G; Sattler, B	Orgel, Csilla; Kereszturi, Akos; Vaczi, Tamas; Groemer, Gernot; Sattler, Birgit	Scientific results and lessons learned from an integrated crewed Mars exploration simulation at the Rio Tinto Mars analogue site	ACTA ASTRONAUTICA	0094-5765	1879-2030		FEB	2014	94	2	736	748		10.1016/j.actaastro.2013.09.014	WOS:000328663500021
J	Lasaponara, R; Leucci, G; Masini, N; Persico, R	Lasaponara, Rosa; Leucci, Giovanni; Masini, Nicola; Persico, Raffaele	Investigating archaeological looting using satellite images and GEORADAR: the experience in Lambayeque in North Peru	JOURNAL OF ARCHAEOLOGICAL SCIENCE	0305-4403	1095-9238		FEB	2014	42		216	230		10.1016/j.jas.2013.10.032	WOS:000332133100018
J	Tavani, S; Granado, P; Corradetti, A; Girundo, M; Iannace, A; Arbues, P; Munoz, JA; Mazzoli, S	Tavani, S.; Granado, P.; Corradetti, A.; Girundo, M.; Iannace, A.; Arbues, P.; Munoz, J. A.; Mazzoli, S.	Building a virtual outcrop, extracting geological information from it, and sharing the results in Google Earth via Open Plot and Photoscan: An example from the Khaviz Anticline (Iran)	COMPUTERS & GEOSCIENCES	0098-3004	1873-7803		FEB	2014	63		44	53		10.1016/j.cageo.2013.10.013	WOS:000330144200006
J	Gurevitch, L	Gurevitch, Leon	Google Warming: Google Earth as eco-machinima	CONVERGENCE-THE INTERNATIONAL JOURNAL OF RESEARCH INTO NEW MEDIA TECHNOLOGIES	1354-8565	1748-7382		FEB	2014	20	1	85	107		10.1177/1354856513516266	WOS:000337679000009
J	Khan, A; Richards, KS; Parker, GT; McRobie, A; Mukhopadhyay, B	Khan, Asif; Richards, Keith S.; Parker, Geoffrey T.; McRobie, Allan; Mukhopadhyay, Biswajit	How large is the Upper Indus Basin? The pitfalls of auto-delineation using DEMs	JOURNAL OF HYDROLOGY	0022-1694	1879-2707		FEB 13	2014	509		442	453		10.1016/j.jhydrol.2013.11.028	WOS:000331662800037
J	Justus, F; Yu, DL	Justus, Faith; Yu, Danlin	Spatial Distribution of Greenhouse Commercial Horticulture in Kenya and the Role of Demographic, Infrastructure and Topo-Edaphic Factors	ISPRS INTERNATIONAL JOURNAL OF GEO-INFORMATION		2220-9964		MAR	2014	3	1	274	296		10.3390/ijgi3010274	WOS:000358932700015
J	Visser, V; Langdon, B; Pauchard, A; Richardson, DM	Visser, Vernon; Langdon, Barbara; Pauchard, Anibal; Richardson, David M.	Unlocking the potential of Google Earth as a tool in invasion science	BIOLOGICAL INVASIONS	1387-3547	1573-1464		MAR	2014	16	3	513	534		10.1007/s10530-013-0604-y	WOS:000330774900004
J	Smith, NG; Karasik, A; Narayanan, T; Olson, ES; Smilansky, U; Levy, TE	Smith, Neil G.; Karasik, Avshalom; Narayanan, Tejaswini; Olson, Eric S.; Smilansky, Uzy; Levy, Thomas E.	The Pottery Informatics Query Database: A New Method for Mathematic and Quantitative Analyses of Large Regional Ceramic Datasets	JOURNAL OF ARCHAEOLOGICAL METHOD AND THEORY	1072-5369	1573-7764		MAR	2014	21	1	212	250		10.1007/s10816-012-9148-1	WOS:000332378700006
J	Crego, RD; Didier, KA; Nielsen, CK	Crego, Ramiro D.; Didier, Karl A.; Nielsen, Clayton K.	Modeling meadow distribution for conservation action in arid and semi-arid Patagonia, Argentina	JOURNAL OF ARID ENVIRONMENTS	0140-1963	1095-922X		MAR	2014	102		68	75		10.1016/j.jaridenv.2013.11.008	WOS:000332437800010
J	Kekovali, K; Kalafat, D	Kekovali, K.; Kalafat, D.	Detecting of Mining-Quarrying Activities in Turkey Using Satellite Imagery and its Correlation with Daytime to Nighttime Ratio Analysis	JOURNAL OF THE INDIAN SOCIETY OF REMOTE SENSING	0255-660X	0974-3006		MAR	2014	42	1	227	232		10.1007/s12524-013-0281-4	WOS:000333119900019
J	Ricotta, EE; Frese, SA; Choobwe, C; Louis, TA; Shiff, CJ	Ricotta, Emily E.; Frese, Steven A.; Choobwe, Cornelius; Louis, Thomas A.; Shiff, Clive J.	Evaluating local vegetation cover as a risk factor for malaria transmission: a new analytical approach using ImageJ	MALARIA JOURNAL		1475-2875		MAR 13	2014	13				94	10.1186/1475-2875-13-94	WOS:000334802000001	24620929
J	Fragoso-Servon, P; Bautistaz, F; Oscar, FY; Pereira, A	Fragoso-Servon, Patricia; Bautistaz, Francisco; Fraustol, Oscar; Pereira, Alberto	Characterization of karst depressions (shape, size and density) at 1:50,000 scale and the associated type of flood in the State of Quintana Roo, Mexico	REVISTA MEXICANA DE CIENCIAS GEOLOGICAS	1026-8774			APR	2014	31	1	127	137			WOS:000335805900010
J	Gao, C	Gao, Cunhai	Relict Thermal-contraction-crack Polygons and Past Permafrost South of the Late Wisconsinan Glacial Limit in the Mid-Atlantic Coastal Plain, USA	PERMAFROST AND PERIGLACIAL PROCESSES	1045-6740	1099-1530		APR-JUN	2014	25	2	144	149		10.1002/ppp.1803	WOS:000337515600007
J	Losiak, A; Golebiowska, I; Orgel, C; Moser, L; MacArthur, J; Boyd, A; Hettrich, S; Jones, N; Groemer, G	Losiak, Anna; Golebiowska, Izabela; Orgel, Csilla; Moser, Linda; MacArthur, Jane; Boyd, Andrea; Hettrich, Sebastian; Jones, Natalie; Groemer, Gernot	Remote Science Support during MARS2013: Testing a Map-Based System of Data Processing and Utilization for Future Long-Duration Planetary Missions	ASTROBIOLOGY	1531-1074	1557-8070		MAY	2014	14	5	417	430		10.1089/ast.2013.1071	WOS:000336216600006	24788035
J	Kvile, KO; Taranto, GH; Pitcher, TJ; Morato, T	Kvile, Kristina O.; Taranto, Gerald H.; Pitcher, Tony J.; Morato, Telmo	A global assessment of seamount ecosystems knowledge using an ecosystem evaluation framework	BIOLOGICAL CONSERVATION	0006-3207	1873-2917		MAY	2014	173		108	120		10.1016/j.biocon.2013.10.002	WOS:000336874100014
J	Box, S; Chen, XY; Blainey, S; Munro, S	Box, Simon; Chen, Xiaoyu; Blainey, Simon; Munro, Stuart	Fine-grained traffic state estimation and visualisation	PROCEEDINGS OF THE INSTITUTION OF CIVIL ENGINEERS-CIVIL ENGINEERING	0965-089X	1751-7672		MAY	2014	167	5	9	16		10.1680/cien.13.00023	WOS:000344312200003
J	Quiquivix, L	Quiquivix, Linda	Art of War, Art of Resistance: Palestinian Counter-Cartography on Google Earth	ANNALS OF THE ASSOCIATION OF AMERICAN GEOGRAPHERS	0004-5608	1467-8306		MAY 4	2014	104	3	444	459		10.1080/00045608.2014.892328	WOS:000335119400003
J	Palmer, L	Palmer, Lindsay	Ushahidi at the Google interface: critiquing the 'geospatial visualization of testimony'	CONTINUUM-JOURNAL OF MEDIA & CULTURAL STUDIES	1030-4312	1469-3666		MAY 4	2014	28	3	342	356		10.1080/10304312.2014.893989	WOS:000335848600006
J	Svenson, GJ; Vollmer, W	Svenson, Gavin J.; Vollmer, William	A case of the higher-level classification of praying mantises (Mantodea) obscuring the synonymy of Majangella Giglio-Tos, 1915 (Liturgusidae, Liturgusinae) and Ephippiomantis Werner, 1922 (Hymenopodidae, Acromantinae)	ZOOTAXA	1175-5326	1175-5334		MAY 21	2014	3797	1	103	119		10.11646/zootaxa.3797.1.10	WOS:000336089200008	24870860
J	Qi, F; Wang, YX	Qi, Feng; Wang, Yixiang	A new calculation method for shape coefficient of residential building using Google Earth	ENERGY AND BUILDINGS	0378-7788	1872-6178		JUN	2014	76		72	80		10.1016/j.enbuild.2014.02.058	WOS:000336779000007
J	Krokstrand, OH; Ramstad, R; Holmebakk, CV	Krokstrand, Ole H.; Ramstad, Reiulf; Holmebakk, Carl-Viggo	Splendid concrete architecture in National Tourist Routes in Norway	STRUCTURAL CONCRETE	1464-4177	1751-7648		JUN	2014	15	2	117	125		10.1002/suco.201300080	WOS:000337507200002
J	Gregory, T; Mullett, A; Norconk, MA	Gregory, Tremaine; Mullett, Amanda; Norconk, Marilyn A.	Strategies for Navigating Large Areas: A GIS Spatial Ecology Analysis of the Bearded Saki Monkey, Chiropotes sagulatus, in Suriname	AMERICAN JOURNAL OF PRIMATOLOGY	0275-2565	1098-2345		JUN	2014	76	6	586	595		10.1002/ajp.22251	WOS:000335490200007	24375420
J	Tao, PJ; Lu, LP; Zhang, Y; Xu, B; Zou, SB	Tao, Pengjie; Lu, Luping; Zhang, Yong; Xu, Biao; Zou, Songbai	On-Orbit Geometric Calibration of the Panchromatic/Multispectral Camera of the ZY-1 02C Satellite based on Public Geographic Data	PHOTOGRAMMETRIC ENGINEERING AND REMOTE SENSING	0099-1112			JUN	2014	80	6	505	517		10.14358/PERS.80.6.505-517	WOS:000337011300009
J	Dou, CY; Zhang, XD; Guo, HD; Han, CM; Liu, M	Dou, Changyong; Zhang, Xiaodong; Guo, Huadong; Han, Chunming; Liu, Ming	Improving the Geolocation Algorithm for Sensors Onboard the ISS: Effect of Drift Angle	REMOTE SENSING	2072-4292			JUN	2014	6	6	4647	4659		10.3390/rs6064647	WOS:000338763300001
J	van Zonneveld, M; Castaneda, N; Scheldeman, X; van Etten, J; Van Damme, P	van Zonneveld, Maarten; Castaneda, Nora; Scheldeman, Xavier; van Etten, Jacob; Van Damme, Patrick	Application of consensus theory to formalize expert evaluations of plant species distribution models	APPLIED VEGETATION SCIENCE	1402-2001	1654-109X		JUL	2014	17	3	528	542		10.1111/avsc.12081	WOS:000337725300015
J	Walker, RS; Hamilton, MJ	Walker, Robert S.; Hamilton, Marcus J.	Amazonian Societies on the Brink of Extinction	AMERICAN JOURNAL OF HUMAN BIOLOGY	1042-0533	1520-6300		JUL-AUG	2014	26	4	570	572		10.1002/ajhb.22552	WOS:000337678600020	24753129
J	Chudyk, AM; Winters, M; Gorman, E; McKay, HA; Ashe, MC	Chudyk, Anna M.; Winters, Meghan; Gorman, Erin; McKay, Heather A.; Ashe, Maureen C.	Agreement Between Virtual and In-the-Field Environment Audits of Assisted Living Sites	JOURNAL OF AGING AND PHYSICAL ACTIVITY	1063-8652	1543-267X		JUL	2014	22	3	414	420		10.1123/JAPA.2013-0047	WOS:000337998800015	24085399
J	Hou, XL; Hodges, BR	Hou, Xianlong; Hodges, Ben R.	Integrating Google Maps/Earth Into an Automated Oil Spill Forecast System	MARINE TECHNOLOGY SOCIETY JOURNAL	0025-3324	1948-1209		JUL-AUG	2014	48	4	79	85		10.4031/MTSJ.48.4.3	WOS:000342656700012
J	Darvill, CM; Stokes, CR; Bentley, MJ; Lovell, H	Darvill, Christopher M.; Stokes, Chris R.; Bentley, Michael J.; Lovell, Harold	A glacial geomorphological map of the southernmost ice lobes of Patagonia: the Bahia Inutil - San Sebastian, Magellan, Otway, Skyring and Rio Gallegos lobes	JOURNAL OF MAPS	1744-5647			JUL 3	2014	10	3	500	520		10.1080/17445647.2014.890134	WOS:000334118000013
J	Zhang, KW; Hu, BX; Robinson, J	Zhang, Kongwen; Hu, Baoxin; Robinson, Justin	Early detection of emerald ash borer infestation using multisourced data: a case study in the town of Oakville, Ontario, Canada	JOURNAL OF APPLIED REMOTE SENSING	1931-3195			JUL 7	2014	8					10.1117/1.JRS.8.083602	WOS:000338505800001
J	Zhong, B; Ma, P; Nie, AH; Yang, AX; Yao, YJ; Lu, WB; Zhang, H; Liu, QH	Zhong Bo; Ma Peng; Nie Aihua; Yang Aixia; Yao YanJuan; Lu Wenbo; Zhang Hang; Liu QinHuo	Land cover mapping using time series HJ-1/CCD data	SCIENCE CHINA-EARTH SCIENCES	1674-7313	1869-1897		AUG	2014	57	8	1790	1799		10.1007/s11430-014-4877-5	WOS:000339818800008
J	Mackey, KG; Bergman, E	Mackey, Kevin G.; Bergman, Eric	Ground-Truth Locations for the Mangyshlak Peaceful Nuclear Explosion Sequence, Western Kazakhstan	BULLETIN OF THE SEISMOLOGICAL SOCIETY OF AMERICA	0037-1106	1943-3573		AUG	2014	104	4	2116	2119		10.1785/0120130330	WOS:000343233600041
J	Telfer, MW; Mills, SC; Mather, AE	Telfer, M. W.; Mills, S. C.; Mather, A. E.	Extensive Quaternary aeolian deposits in the Drakensberg foothills, Rooiberge, South Africa	GEOMORPHOLOGY	0169-555X	1872-695X		AUG 15	2014	219		161	175		10.1016/j.geomorph.2014.05.006	WOS:000339775100013
J	Park, M; Luo, JB; Collins, RT; Liu, YX	Park, Minwoo; Luo, Jiebo; Collins, Robert T.; Liu, Yanxi	Estimating the camera direction of a geotagged image using reference images	PATTERN RECOGNITION	0031-3203	1873-5142		SEP	2014	47	9	2880	2893		10.1016/j.patcog.2014.03.002	WOS:000336872000008
J	Ansari, Z; Seyfabadi, J; Owfi, F; Rahimi, M	Ansari, Zeinab; Seyfabadi, Jafar; Owfi, Fereidoon; Rahimi, Morvarid	Habitat classification of southern coast of Qeshm Island based on surface geology structure	INDIAN JOURNAL OF GEO-MARINE SCIENCES	0379-5136	0975-1033		SEP	2014	43	9	1757	1763			WOS:000209747300016
J	Rogers, CW; Bolwell, CF; Gee, EK; Peterson, ML; McIlwraith, CW	Rogers, Chris W.; Bolwell, Charlotte F.; Gee, Erica K.; Peterson, Michael L.; McIlwraith, C. Wayne	Profile and Surface Conditions of New Zealand Thoroughbred Racetracks	JOURNAL OF EQUINE VETERINARY SCIENCE	0737-0806	1542-7412		SEP	2014	34	9	1105	1109		10.1016/j.jevs.2014.06.017	WOS:000342396700011
J	Parajuli, SP; Yang, ZL; Kocurek, G	Parajuli, Sagar Prasad; Yang, Zong-Liang; Kocurek, Gary	Mapping erodibility in dust source regions based on geomorphology, meteorology, and remote sensing	JOURNAL OF GEOPHYSICAL RESEARCH-EARTH SURFACE	2169-9003	2169-9011		SEP	2014	119	9	1977	1994		10.1002/2014JF003095	WOS:000343876500011
J	Escamilla, V; Emch, M; Dandalo, L; Miller, WC; Martinson, F; Hoffman, I	Escamilla, Veronica; Emch, Michael; Dandalo, Leonard; Miller, William C.; Martinson, Francis; Hoffman, Irving	Sampling at community level by using satellite imagery and geographical analysis	BULLETIN OF THE WORLD HEALTH ORGANIZATION	0042-9686	1564-0604		SEP	2014	92	9	690	694		10.2471/BLT.14.140756	WOS:000342719000014	25378761
J	Atha, JB	Atha, J. B.	IDENTIFICATION OF FLUVIAL WOOD USING GOOGLE EARTH	RIVER RESEARCH AND APPLICATIONS	1535-1459	1535-1467		SEP	2014	30	7	857	864		10.1002/rra.2683	WOS:000342960600004
J	Polczynski, M; Polczynski, M	Polczynski, Mark; Polczynski, Michael	A Microsoft VBA Application for Generating Heat Maps	TRANSACTIONS IN GIS	1361-1682	1467-9671		OCT	2014	18	5	783	791		10.1111/tgis.12082	WOS:000342768600008
J	Rangecroft, S; Harrison, S; Anderson, K; Magrath, J; Castel, AP; Pacheco, P	Rangecroft, Sally; Harrison, Stephan; Anderson, Karen; Magrath, John; Paola Castel, Ana; Pacheco, Paula	A First Rock Glacier Inventory for the Bolivian Andes	PERMAFROST AND PERIGLACIAL PROCESSES	1045-6740	1099-1530		OCT-DEC	2014	25	4	333	343		10.1002/ppp.1816	WOS:000345992700010
J	Harris, L; Nel, R; Holness, S; Sink, K; Schoeman, D	Harris, Linda; Nel, Ronel; Holness, Stephen; Sink, Kerry; Schoeman, David	Setting conservation targets for sandy beach ecosystems	ESTUARINE COASTAL AND SHELF SCIENCE	0272-7714	1096-0015		OCT 5	2014	150		45	57		10.1016/j.ecss.2013.05.016	WOS:000346221000005
J	Mi, CR; Huettmann, F; Guo, YM	Mi, Chunrong; Huettmann, Falk; Guo, Yumin	Obtaining the best possible predictions of habitat selection for wintering Great Bustards in Cangzhou, Hebei Province with rapid machine learning analysis	CHINESE SCIENCE BULLETIN	1001-6538	1861-9541		NOV	2014	59	32	4323	4331		10.1007/s11434-014-0445-9	WOS:000342451800018
J	Ghaffarian, S; Ghaffarian, S	Ghaffarian, Saman; Ghaffarian, Salar	Automatic building detection based on Purposive FastICA (PFICA) algorithm using monocular high resolution Google Earth images	ISPRS JOURNAL OF PHOTOGRAMMETRY AND REMOTE SENSING	0924-2716	1872-8235		NOV	2014	97		152	159		10.1016/j.isprsjprs.2014.08.017	WOS:000344439100013
J	Morgado, P; Gomes, E; Costa, N	Morgado, Paulo; Gomes, Eduardo; Costa, Nuno	Competing visions? Simulating alternative coastal futures using a GIS-ANN web application	OCEAN & COASTAL MANAGEMENT	0964-5691	1873-524X		NOV	2014	101		79	88		10.1016/j.ocecoaman.2014.09.022	WOS:000345182700003
J	Mozumder, C; Tripathi, NK; Tipdecho, T	Mozumder, Chitrini; Tripathi, N. K.; Tipdecho, Taravudh	Ecosystem evaluation (1989-2012) of Ramsar wetland Deepor Beel using satellite-derived indices	ENVIRONMENTAL MONITORING AND ASSESSMENT	0167-6369	1573-2959		NOV	2014	186	11	7909	7927		10.1007/s10661-014-3976-2	WOS:000343051400071	25092138
J	Zhu, LF; Wang, XF; Pan, X	Zhu, Liang-feng; Wang, Xi-feng; Pan, Xin	Moving KML geometry elements within Google Earth	COMPUTERS & GEOSCIENCES	0098-3004	1873-7803		NOV	2014	72		176	183		10.1016/j.cageo.2014.07.016	WOS:000343631600015
J	Schroeder, TA; Healey, SP; Moisen, GG; Frescino, TS; Cohen, WB; Huang, CQ; Kennedy, RE; Yang, ZQ	Schroeder, Todd A.; Healey, Sean P.; Moisen, Gretchen G.; Frescino, Tracey S.; Cohen, Warren B.; Huang, Chengquan; Kennedy, Robert E.; Yang, Zhiqiang	Improving estimates of forest disturbance by combining observations from Landsat time series with US Forest Service Forest Inventory and Analysis data	REMOTE SENSING OF ENVIRONMENT	0034-4257	1879-0704		NOV	2014	154		61	73		10.1016/j.rse.2014.08.005	WOS:000345201900006
J	Aliane, N; Fernandez, J; Mata, M; Bemposta, S	Aliane, Nourdine; Fernandez, Javier; Mata, Mario; Bemposta, Sergio	A System for Traffic Violation Detection	SENSORS		1424-8220		NOV	2014	14	11	22113	22127		10.3390/s141122113	WOS:000345562800117	25421737
J	Lu, LZ; Di, LP; Ye, YM	Lu, Lizhen; Di, Liping; Ye, Yanmei	A Decision-Tree Classifier for Extracting Transparent Plastic-Mulched Landcover from Landsat-5 TM Images	IEEE JOURNAL OF SELECTED TOPICS IN APPLIED EARTH OBSERVATIONS AND REMOTE SENSING	1939-1404	2151-1535		NOV	2014	7	11	4548	4558		10.1109/JSTARS.2014.2327226	WOS:000347875700025
J	Lyon, W; De Joux, P	Lyon, Warrick; De Joux, Peter	A Tracking System for Sharks in Shallow Water	MARINE TECHNOLOGY SOCIETY JOURNAL	0025-3324	1948-1209		NOV-DEC	2014	48	6	14	20		10.4031/MTSJ.48.6.2	WOS:000348004000003
J	Dikmen, M; Halici, U	Dikmen, Mehmet; Halici, Ugur	A Learning-Based Resegmentation Method for Extraction of Buildings in Satellite Images	IEEE GEOSCIENCE AND REMOTE SENSING LETTERS	1545-598X	1558-0571		DEC	2014	11	12	2150	2153		10.1109/LGRS.2014.2321658	WOS:000340951400026
J	Landmann, T; Dubovyk, O	Landmann, Tobias; Dubovyk, Olena	Spatial analysis of human-induced vegetation productivity decline over eastern Africa using a decade (2001-2011) of medium resolution MODIS time-series data	INTERNATIONAL JOURNAL OF APPLIED EARTH OBSERVATION AND GEOINFORMATION	0303-2434			DEC	2014	33		76	82		10.1016/j.jag.2014.04.020	WOS:000340979300009
J	Shimada, M; Itoh, T; Motooka, T; Watanabe, M; Shiraishi, T; Thapa, R; Lucas, R	Shimada, Masanobu; Itoh, Takuya; Motooka, Takeshi; Watanabe, Manabu; Shiraishi, Tomohiro; Thapa, Rajesh; Lucas, Richard	New global forest/non-forest maps from ALOS PALSAR data (2007-2010)	REMOTE SENSING OF ENVIRONMENT	0034-4257	1879-0704		DEC	2014	155		13	31		10.1016/j.rse.2014.04.014	WOS:000345804200004
J	Luo, L; Wang, XY; Guo, HD; Liu, CS; Liu, J; Li, L; Du, XC; Qian, GQ	Luo, Lei; Wang, Xinyuan; Guo, Huadong; Liu, Chuansheng; Liu, Jie; Li, Li; Du, Xiaocui; Qian, Guoquan	Automated Extraction of the Archaeological Tops of Qanat Shafts from VHR Imagery in Google Earth	REMOTE SENSING	2072-4292			DEC	2014	6	12	11956	11976		10.3390/rs61211956	WOS:000346795300014
J	Martinez-Grana, AM; Gonzalez-Delgado, JA; Pallares, S; Goy, JL; Llovera, JC	Miguel Martinez-Grana, Antonio; Angel Gonzalez-Delgado, Jose; Pallares, Silvia; Luis Goy, Jose; Civis Llovera, Jorge	3D Virtual Itinerary for Education Using Google Earth as a Tool for the Recovery of the Geological Heritage of Natural Areas: Application in the Las Batuecas Valley Nature Park (Salamanca, Spain)	SUSTAINABILITY	2071-1050			DEC	2014	6	12	8567	8591		10.3390/su6128567	WOS:000346794700013
J	Magana, P; Lopez-Ruiz, A; Lira, A; Ortega-Sanchez, M; Losada, MA	Magana, Pedro; Lopez-Ruiz, Alejandro; Lira, Andrea; Ortega-Sanchez, Miguel; Losada, Miguel A.	A public, open Western Europe database of shoreline undulations based on imagery	APPLIED GEOGRAPHY	0143-6228	1873-7730		DEC	2014	55		278	291		10.1016/j.apgeog.2014.09.018	WOS:000346891500027
J	Berry, AJ; Fahey, S; Meyers, N	Berry, Ashton J.; Fahey, Shireen; Meyers, Noel	Sandy beaches as dynamic refugia: Potential barriers to shoreline retreat on the Sunshine Coast, Queensland, Australia	OCEAN & COASTAL MANAGEMENT	0964-5691	1873-524X		DEC	2014	102		32	39		10.1016/j.ocecoaman.2014.08.006	WOS:000347579600004
J	Kjer, KM; Zhou, X; Frandsen, PB; Thomas, JA; Blahnik, RJ	Kjer, Karl M.; Zhou, Xin; Frandsen, Paul B.; Thomas, Jessica A.; Blahnik, Roger J.	Moving toward species-level phylogeny using ribosomal DNA and COI barcodes: an example from the diverse caddisfly genus Chimarra (Trichoptera: Philopotamidae)	ARTHROPOD SYSTEMATICS & PHYLOGENY	1863-7221	1864-8312		DEC	2014	72	3	345	354			WOS:000349055100007
J	Li, ZB; Liu, ZZ; Shi, WZ	Li, Zhongbin; Liu, Zhizhao; Shi, Wenzhong	Semiautomatic Airport Runway Extraction Using a Line-Finder-Aided Level Set Evolution	IEEE JOURNAL OF SELECTED TOPICS IN APPLIED EARTH OBSERVATIONS AND REMOTE SENSING	1939-1404	2151-1535		DEC	2014	7	12	4738	4749		10.1109/JSTARS.2014.2298332	WOS:000348372000012
J	Chew, KW; Leong, CK	Chew, Kuew Wai; Leong, Chee Ken	CONTOUR DATA ACQUISITION SYSTEM FOR ELECTRIC VEHICLE DISTANCE ESTIMATION SYSTEM	JOURNAL OF MARINE SCIENCE AND TECHNOLOGY-TAIWAN	1023-2796			DEC	2014	22	6	700	704		10.6119/JMST-014-0321-6	WOS:000352829300006
J	Collin, A; Nadaoka, K; Nakamura, T	Collin, Antoine; Nadaoka, Kazuo; Nakamura, Takashi	Mapping VHR Water Depth, Seabed and Land Cover Using Google Earth Data	ISPRS INTERNATIONAL JOURNAL OF GEO-INFORMATION		2220-9964		DEC	2014	3	4	1157	1179		10.3390/ijgi3041157	WOS:000358934300001
J	Ribeiro, AI; Olhero, A; Teixeira, H; Magalhaes, A; Pina, MF	Ribeiro, Ana Isabel; Olhero, Andreia; Teixeira, Hugo; Magalhaes, Alexandre; Pina, Maria Fatima	Tools for Address Georeferencing - Limitations and Opportunities Every Public Health Professional Should Be Aware Of	PLOS ONE	1932-6203			DEC 3	2014	9	12			e114130	10.1371/journal.pone.0114130	WOS:000349128700074	25469514
J	Bethlehem, JR; Mackenbach, JD; Ben-Rebah, M; Compernolle, S; Glonti, K; Bardos, H; Rutter, HR; Charreire, H; Oppert, JM; Brug, J; Lakerveld, J	Bethlehem, John R.; Mackenbach, Joreintje D.; Ben-Rebah, Maher; Compernolle, Sofie; Glonti, Ketevan; Bardos, Helga; Rutter, Harry R.; Charreire, Helene; Oppert, Jean-Michel; Brug, Johannes; Lakerveld, Jeroen	The SPOTLIGHT virtual audit tool: a valid and reliable tool to assess obesogenic characteristics of the built environment	INTERNATIONAL JOURNAL OF HEALTH GEOGRAPHICS	1476-072X			DEC 16	2014	13				52	10.1186/1476-072X-13-52	WOS:000346932100001	25515179
J	Nuimura, T; Sakai, A; Taniguchi, K; Nagai, H; Lamsal, D; Tsutaki, S; Kozawa, A; Hoshina, Y; Takenaka, S; Omiya, S; Tsunematsu, K; Tshering, P; Fujita, K	Nuimura, T.; Sakai, A.; Taniguchi, K.; Nagai, H.; Lamsal, D.; Tsutaki, S.; Kozawa, A.; Hoshina, Y.; Takenaka, S.; Omiya, S.; Tsunematsu, K.; Tshering, P.; Fujita, K.	The GAMDAM glacier inventory: a quality-controlled inventory of Asian glaciers	CRYOSPHERE	1994-0416	1994-0424			2015	9	3	849	864		10.5194/tc-9-849-2015	WOS:000354442400003
J	Vora, KS; Yasobant, S; Patel, A; Upadhyay, A; Mavalankar, DV	Vora, Kranti Suresh; Yasobant, Sandul; Patel, Amit; Upadhyay, Ashish; Mavalankar, Dileep V.	Has Chiranjeevi Yojana changed the geographic availability of free comprehensive emergency obstetric care services in Gujarat, India?	GLOBAL HEALTH ACTION		1654-9880			2015	8		1	11	28977	10.3402/gha.v8.28977	WOS:000362502700001
J	Alifu, H; Tateishi, R; Johnson, B	Alifu, Haireti; Tateishi, Ryutaro; Johnson, Brian	A new band ratio technique for mapping debris-covered glaciers using Landsat imagery and a digital elevation model	INTERNATIONAL JOURNAL OF REMOTE SENSING	0143-1161	1366-5901			2015	36	8	2063	2075		10.1080/2150704X.2015.1034886	WOS:000353577600004
J	Jimenez-Munoz, JC; Mattar, C; Sobrino, JA; Malhi, Y	Jimenez-Munoz, Juan C.; Mattar, Cristian; Sobrino, Jose A.; Malhi, Yadvinder	A database for the monitoring of thermal anomalies over the Amazon forest and adjacent intertropical oceans	SCIENTIFIC DATA	2052-4463				2015	2				150024	10.1038/sdata.2015.24	WOS:000209844100020	26029379
J	Kheifets, L; Crespi, CM; Hooper, C; Oksuzyan, S; Cockburn, M; Ly, T; Mezei, G	Kheifets, Leeka; Crespi, Catherine M.; Hooper, Chris; Oksuzyan, Sona; Cockburn, Myles; Ly, Thomas; Mezei, Gabor	Epidemiologic study of residential proximity to transmission lines and childhood cancer in California: description of design, epidemiologic methods and study population	JOURNAL OF EXPOSURE SCIENCE AND ENVIRONMENTAL EPIDEMIOLOGY	1559-0631	1559-064X		JAN-FEB	2015	25	1	45	52		10.1038/jes.2013.48	WOS:000346431500007	24045429
J	Ratcliffe, KT; Wilson, A; Payenberg, T; Riftersbacher, A; Hildred, GV; Flint, SS	Ratcliffe, K. T.; Wilson, A.; Payenberg, T.; Riftersbacher, A.; Hildred, G. V.; Flint, S. S.	Ground truthing chemostratigraphic correlations in fluvial systems	AAPG BULLETIN	0149-1423	1558-9153		JAN	2015	99	1	155	180		10.1306/06051413120	WOS:000348247800008
J	Chen, GY; Liu, CC; Yao, CC	Chen, Guan-Yu; Liu, Chin-Chu; Yao, Cheng-Chung	Forecast System for Offshore Water Surface Elevation With Inundation Map Integrated for Tsunami Early Warning	IEEE JOURNAL OF OCEANIC ENGINEERING	0364-9059	1558-1691		JAN	2015	40	1	37	47		10.1109/JOE.2013.2295948	WOS:000347971400005
J	Cracknell, AP; Kanniah, KD; Tan, KP; Wang, L	Cracknell, Arthur Philip; Kanniah, Kasturi Devi; Tan, Kian Pang; Wang, Lei	Towards the development of a regional version of MOD17 for the determination of gross and net primary productivity of oil palm trees	INTERNATIONAL JOURNAL OF REMOTE SENSING	0143-1161	1366-5901			2015	36	1	262	289		10.1080/01431161.2014.995278	WOS:000348464300011
J	Mishra, NB; Chaudhuri, G	Mishra, Niti B.; Chaudhuri, Gargi	Spatio-temporal analysis of trends in seasonal vegetation productivity across Uttarakhand, Indian Himalayas, 2000-2014	APPLIED GEOGRAPHY	0143-6228	1873-7730		JAN	2015	56		29	41		10.1016/j.apgeog.2014.10.007	WOS:000349578700004
J	Pebesma, E; Bivand, R; Ribeiro, PJ	Pebesma, Edzer E; Bivand, Roger; Ribeiro, Paulo Justiano	Software for Spatial Statistics	JOURNAL OF STATISTICAL SOFTWARE	1548-7660			JAN	2015	63	1	1	8			WOS:000349844700001
J	Martinez-Grana, AM; Goy, JL; Zazo, C	Martinez-Grana, A. M.; Goy, J. L.; Zazo, C.	Dominant soil map in 'Las Batuecas-Sierra De Francia' and 'Quilamas' nature parks (Central System, Salamanca, Spain)	JOURNAL OF MAPS	1744-5647				2015	11	3	371	379		10.1080/17445647.2014.960014	WOS:000349988600001
J	Xu, YM; Ho, HC; Xiong, WC	Xu, Yongming; Ho, Hung Chak; Xiong, Wencheng	Mapping a pollution index for the transboundary Red River Valley, Asia, 2009-2011	JOURNAL OF MAPS	1744-5647				2015	11	3	396	404		10.1080/17445647.2014.934747	WOS:000349988600003
J	Minoz-Cristobal, JA; Prieto, LP; Asensio-Perez, JI; Martinez-Mones, A; Jorrin-Abellan, IM; Dimitriadis, Y	Minoz-Cristobal, Juan A.; Prieto, Luis P.; Asensio-Perez, Juan I.; Martinez-Mones, Alejandra; Jorrin-Abellan, Ivan M.; Dimitriadis, Yannis	Coming Down to Earth: Helping Teachers Use 3D Virtual Worlds in Across-Spaces Learning Situations	EDUCATIONAL TECHNOLOGY & SOCIETY	1176-3647	1436-4522		JAN	2015	18	1	13	26			WOS:000351443300003
J	Perez-Costillas, L; Blasco-Fontecilla, H; Benitez, N; Comino, R; Anton, JM; Ramos-Medina, V; Lopez, A; Palomo, JL; Madrigal, L; Alcalde, J; Perea-Milla, E; Artieda-Urrutia, P; de Leon-Martinez, V; Otero, YD	Perez-Costillas, Lucia; Blasco-Fontecilla, Hilario; Benitez, Nicolas; Comino, Raquel; Miguel Anton, Jose; Ramos-Medina, Valentin; Lopez, Amalia; Luis Palomo, Jose; Madrigal, Lucia; Alcalde, Javier; Perea-Milla, Emilio; Artieda-Urrutia, Paula; de Leon-Martinez, Victoria; de Diego Otero, Yolanda	Space-time suicide clustering in the community of Antequera (Spain)	REVISTA DE PSIQUIATRIA Y SALUD MENTAL	1888-9891	1989-4600		JAN-MAR	2015	8	1	26	34		10.1016/j.rpsm.2014.01.007	WOS:000357339100005	24986472
J	Schmid, MO; Baral, P; Gruber, S; Shahi, S; Shrestha, T; Stumm, D; Wester, P	Schmid, M. -O.; Baral, P.; Gruber, S.; Shahi, S.; Shrestha, T.; Stumm, D.; Wester, P.	Assessment of permafrost distribution maps in the Hindu Kush Himalayan region using rock glaciers mapped in Google Earth	CRYOSPHERE	1994-0416	1994-0424			2015	9	6	2089	2099		10.5194/tc-9-2089-2015	WOS:000367523400006
J	Yatagai, A; Sato, Y; Shinbori, A; Abe, S; UeNo, S	Yatagai, Akiyo; Sato, Yuka; Shinbori, Atsuki; Abe, Shuji; UeNo, Satoru	The capacity-building and science-enabling activities of the IUGONET for the solar-terrestrial research community	EARTH PLANETS AND SPACE	1880-5981			JAN 8	2015	67				2	10.1186/s40623-014-0170-2	WOS:000351343500001
J	Nagabhatla, N; Padmanabhan, M; Kuhle, P; Vishnudas, S; Betz, L; Niemeyer, B	Nagabhatla, Nidhi; Padmanabhan, Martina; Kuehle, Peter; Vishnudas, Suma; Betz, Lydia; Niemeyer, Bastian	LCLUC as an entry point for transdisciplinary research - Reflections from an agriculture land use change study in South Asia	JOURNAL OF ENVIRONMENTAL MANAGEMENT	0301-4797	1095-8630		JAN 15	2015	148		42	52		10.1016/j.jenvman.2014.03.019	WOS:000348016400006	24874892
J	Gilani, H; Shrestha, HL; Murthy, MSR; Phuntso, P; Pradhan, S; Bajracharya, B; Shrestha, B	Gilani, Hammad; Shrestha, Him Lal; Murthy, M. S. R.; Phuntso, Phuntso; Pradhan, Sudip; Bajracharya, Birendra; Shrestha, Basanta	Decadal land cover change dynamics in Bhutan	JOURNAL OF ENVIRONMENTAL MANAGEMENT	0301-4797	1095-8630		JAN 15	2015	148		91	100		10.1016/j.jenvman.2014.02.014	WOS:000348016400010	24680540
J	Marek, L; Tucek, P; Paszto, V	Marek, Lukas; Tucek, Pavel; Paszto, Vit	Using geovisual analytics in Google Earth to understand disease distribution: a case study of campylobacteriosis in the Czech Republic (2008-2012)	INTERNATIONAL JOURNAL OF HEALTH GEOGRAPHICS	1476-072X			JAN 28	2015	14				7	10.1186/1476-072X-14-7	WOS:000349052500001	25628063
J	Zelenyuk, A; Imre, D; Wilson, J; Zhang, ZY; Wang, J; Mueller, K	Zelenyuk, Alla; Imre, Dan; Wilson, Jacqueline; Zhang, Zhiyuan; Wang, Jun; Mueller, Klaus	Airborne Single Particle Mass Spectrometers (SPLAT II & miniSPLAT) and New Software for Data Visualization and Analysis in a Geo-Spatial Context	JOURNAL OF THE AMERICAN SOCIETY FOR MASS SPECTROMETRY	1044-0305	1879-1123		FEB	2015	26	2	257	270		10.1007/s13361-014-1043-4	WOS:000349223000008	25563475
J	Chian, SC; Wilkinson, SM	Chian, S. C.; Wilkinson, S. M.	Feasibility of Remote Sensing for Multihazard Analysis of Landslides in Padang Pariaman during the 2009 Padang Earthquake	NATURAL HAZARDS REVIEW	1527-6988	1527-6996		FEB	2015	16	1				10.1061/(ASCE)NH.1527-6996.0000143	WOS:000348152600003
J	de Graaf, G; Bartley, D; Jorgensen, J; Marmulla, G	de Graaf, G.; Bartley, D.; Jorgensen, J.; Marmulla, G.	The scale of inland fisheries, can we do better? Alternative approaches for assessment	FISHERIES MANAGEMENT AND ECOLOGY	0969-997X	1365-2400		FEB	2015	22	1	64	70		10.1111/j.1365-2400.2011.00844.x	WOS:000348926700007
J	Bell, RJ; Davey, NG; Martinsen, M; Collin-Hansen, C; Krogh, ET; Gill, CG	Bell, Ryan J.; Davey, Nicholas G.; Martinsen, Morten; Collin-Hansen, Christian; Krogh, Erik T.; Gill, Christopher G.	A Field-Portable Membrane Introduction Mass Spectrometer for Real-time Quantitation and Spatial Mapping of Atmospheric and Aqueous Contaminants	JOURNAL OF THE AMERICAN SOCIETY FOR MASS SPECTROMETRY	1044-0305	1879-1123		FEB	2015	26	2	212	223		10.1007/s13361-014-1028-3	WOS:000349223000003	25477082
J	Yang, XP; Feng, XJ; Huang, XN; Song, FM; Li, GY; Chen, XC; Zhang, L; Huang, WL	Yang Xiao-Ping; Feng Xi-Jie; Huang Xiong-Nan; Song Fang-Min; Li Gao-Yang; Chen Xian-Cheng; Zhang Ling; Huang Wei-Liang	The Late Quaternary activity characteristics of the Lixian-Luojiabu fault: A discussion on the seismogenic mechanism of the Lixian M8 earthquake in 1654	CHINESE JOURNAL OF GEOPHYSICS-CHINESE EDITION	0001-5733			FEB	2015	58	2	504	519		10.6038/cjg20150214	WOS:000349431600014
J	Li, J; Qin, QM; Han, JW; Tang, LA; Lei, KH	Li, Jun; Qin, Qiming; Han, Jiawei; Tang, Lu-An; Lei, Kin Hou	Mining Trajectory Data and Geotagged Data in Social Media for Road Map Inference	TRANSACTIONS IN GIS	1361-1682	1467-9671		FEB	2015	19	1	1	18		10.1111/tgis.12072	WOS:000350139700001
J	Lu, N; Hernandez, AJ; Ramsey, RD	Lu, Ning; Hernandez, Alexander J.; Ramsey, R. Douglas	Land cover dynamics monitoring with Landsat data in Kunming, China: a cost-effective sampling and modelling scheme using Google Earth imagery and random forests	GEOCARTO INTERNATIONAL	1010-6049	1752-0762		FEB 7	2015	30	2	186	201		10.1080/10106049.2014.894583	WOS:000346581300006
J	Tooth, S	Tooth, Stephen	Google Earth as a resource	GEOGRAPHY	0016-7487	2043-6564		SPR	2015	100		51	56			WOS:000348974300008
J	Gonzalez-Delgado, JA; Martinez-Grana, AM; Civis, J; Sierro, FJ; Goy, JL; Dabrio, CJ; Ruiz, F; Gonzalez-Regalado, ML; Abad, M	Gonzalez-Delgado, J. A.; Martinez-Grana, A. M.; Civis, J.; Sierro, F. J.; Goy, J. L.; Dabrio, C. J.; Ruiz, F.; Gonzalez-Regalado, M. L.; Abad, M.	Virtual 3D tour of the Neogene palaeontological heritage of Huelva (Guadalquivir Basin, Spain)	ENVIRONMENTAL EARTH SCIENCES	1866-6280	1866-6299		APR	2015	73	8	4609	4618		10.1007/s12665-014-3747-y	WOS:000351453600052
J	Murillo-Garcia, FG; Alcantara-Ayala, I; Ardizzone, F; Cardinali, M; Fiourucci, F; Guzzetti, F	Giselle Murillo-Garcia, Franny; Alcantara-Ayala, Irasema; Ardizzone, Francesca; Cardinali, Mauro; Fiourucci, Federica; Guzzetti, Fausto	Satellite stereoscopic pair images of very high resolution: a step forward for the development of landslide inventories	LANDSLIDES	1612-510X	1612-5118		APR	2015	12	2	277	291		10.1007/s10346-014-0473-1	WOS:000352147300005
J	Conesa, FC; Madella, M; Galiatsatos, N; Balbo, AL; Rajesh, SV; Ajithprasad, P	Conesa, Francesc C.; Madella, Marco; Galiatsatos, Nikolaos; Balbo, Andrea L.; Rajesh, S. V.; Ajithprasad, P.	CORONA Photographs in Monsoonal Semi-arid Environments: Addressing Archaeological Surveys and Historic Landscape Dynamics over North Gujarat, India	ARCHAEOLOGICAL PROSPECTION	1075-2196	1099-0763		APR-JUN	2015	22	2	75	90		10.1002/arp.1498	WOS:000355725600001
J	Dumitru, CO; Cui, SY; Schwarz, G; Datcu, M	Dumitru, Corneliu Octavian; Cui, Shiyong; Schwarz, Gottfried; Datcu, Mihai	Information Content of Very-High-Resolution SAR Images: Semantics, Geospatial Context, and Ontologies	IEEE JOURNAL OF SELECTED TOPICS IN APPLIED EARTH OBSERVATIONS AND REMOTE SENSING	1939-1404	2151-1535		APR	2015	8	4	1635	1650		10.1109/JSTARS.2014.2363595	WOS:000358568900025
J	Zhai, L; Sang, HY; Gao, Y; An, F; Zhang, Y; Wei, SL	Zhai, Liang; Sang, Huiyong; Gao, Yang; An, Fang; Zhang, Ying; Wei, Shilei	A new approach for mapping regional land cover and the application of this approach in Australia	REMOTE SENSING LETTERS	2150-704X	2150-7058		APR 3	2015	6	4	267	275		10.1080/2150704X.2015.1029089	WOS:000355160600002
J	Badreldin, N; Uria-Diez, J; Mateu, J; Youssef, A; Stal, C; El-Bana, M; Magdy, A; Goossens, R	Badreldin, Nasem; Uria-Diez, J.; Mateu, J.; Youssef, Ali; Stal, Cornelis; El-Bana, Magdy; Magdy, Ahmed; Goossens, Rudi	A spatial pattern analysis of the halophytic species distribution in an arid coastal environment	ENVIRONMENTAL MONITORING AND ASSESSMENT	0167-6369	1573-2959		MAY	2015	187	5			224	10.1007/s10661-015-4403-z	WOS:000352113400004	25838060
J	Kim, M; Clarke, P	Kim, MinHee; Clarke, Philippa	Urban Social and Built Environments and Trajectories of Decline in Social Engagement in Vulnerable Elders: Findings From Detroit's Medicaid Home and Community-Based Waiver Population	RESEARCH ON AGING	0164-0275	1552-7573		MAY	2015	37	4	413	435		10.1177/0164027514540687	WOS:000351850000004	25651577
J	Singh, M; Evans, D; Friess, DA; Tan, BS; Nin, CS	Singh, Minerva; Evans, Damian; Friess, Daniel A.; Tan, Boun Suy; Nin, Chan Samean	Mapping Above-Ground Biomass in a Tropical Forest in Cambodia Using Canopy Textures Derived from Google Earth	REMOTE SENSING		2072-4292		MAY	2015	7	5	5057	5076		10.3390/rs70505057	WOS:000357596200005
J	Large, ARG; Gilvear, DJ	Large, A. R. G.; Gilvear, D. J.	USING GOOGLE EARTH, A VIRTUAL-GLOBE IMAGING PLATFORM, FOR ECOSYSTEM SERVICES-BASED RIVER ASSESSMENT	RIVER RESEARCH AND APPLICATIONS	1535-1459	1535-1467		MAY	2015	31	4	406	421		10.1002/rra.2798	WOS:000353029300002
J	Wang, J; Xiao, XM; Qin, YW; Dong, JW; Zhang, GL; Kou, WL; Jin, C; Zhou, YT; Zhang, Y	Wang, Jie; Xiao, Xiangming; Qin, Yuanwei; Dong, Jinwei; Zhang, Geli; Kou, Weili; Jin, Cui; Zhou, Yuting; Zhang, Yao	Mapping paddy rice planting area in wheat-rice double-cropped areas through integration of Landsat-8 OLI, MODIS, and PALSAR images	SCIENTIFIC REPORTS	2045-2322			MAY 12	2015	5				10088	10.1038/srep10088	WOS:000354311000001	25965027
J	Jacobs, M; Schloeder, C; Tanimoto, P	Jacobs, Michael J.; Schloeder, Catherine A.; Tanimoto, Philip D.	Dryland agriculture and rangeland restoration priorities in Afghanistan	JOURNAL OF ARID LAND	1674-6767	2194-7783		JUN	2015	7	3	391	402		10.1007/s40333-015-0002-7	WOS:000349980400011
J	Abate, M; Nyssen, J; Steenhuis, TS; Moges, MM; Tilahun, SA; Enku, T; Adgo, E	Abate, Mengiste; Nyssen, Jan; Steenhuis, Tammo S.; Moges, Michael M.; Tilahun, Seifu A.; Enku, Temesgen; Adgo, Enyew	Morphological changes of Gumara River channel over 50 years, upper Blue Nile basin, Ethiopia	JOURNAL OF HYDROLOGY	0022-1694	1879-2707		JUN	2015	525		152	164		10.1016/j.jhydrol.2015.03.044	WOS:000355885600012
J	Wu, JY; Zhou, YB; Chen, Y; Liang, S; Li, LH; Zheng, SB; Zhu, SP; Ren, GH; Song, XX; Jiang, QW	Wu, Jin-Yi; Zhou, Yi-Biao; Chen, Yue; Liang, Song; Li, Lin-Han; Zheng, Sheng-Bang; Zhu, Shao-ping; Ren, Guang-Hui; Song, Xiu-Xia; Jiang, Qing-Wu	Three Gorges Dam: Impact of Water Level Changes on the Density of Schistosome-Transmitting Snail Oncomelania hupensis in Dongting Lake Area, China	PLOS NEGLECTED TROPICAL DISEASES	1935-2735			JUN	2015	9	6			e0003882	10.1371/journal.pntd.0003882	WOS:000357398100062	26114956
J	Martinez-Grana, AM; Goy, JL; Cimarra, C	Martinez-Grana, A. M.; Goy, J. L.; Cimarra, C.	2D to 3D geologic mapping transformation using virtual globes and flight simulators and their applications in the analysis of geodiversity in natural areas	ENVIRONMENTAL EARTH SCIENCES	1866-6280	1866-6299		JUN	2015	73	12	8023	8034		10.1007/s12665-014-3959-1	WOS:000355142800033
J	Zhang, JQ; Gurung, DR; Liu, RK; Murthy, MSR; Su, FH	Zhang, Jianqiang; Gurung, Deo Raj; Liu, Rongkun; Murthy, Manchiraju Sri Ramachandra; Su, Fenghuan	Abe Barek landslide and landslide susceptibility assessment in Badakhshan Province, Afghanistan	LANDSLIDES	1612-510X	1612-5118		JUN	2015	12	3	597	609		10.1007/s10346-015-0558-5	WOS:000355341400014
J	Gautney, JR; Holliday, TW	Gautney, Joanna R.; Holliday, Trenton W.	New estimations of habitable land area and human population size at the Last Glacial Maximum	JOURNAL OF ARCHAEOLOGICAL SCIENCE	0305-4403	1095-9238		JUN	2015	58		103	112		10.1016/j.jas.2015.03.028	WOS:000355354400009
J	Li, T; Chen, J; Thompson, JA; Burbank, DW; Yang, XD	Li, Tao; Chen, Jie; Thompson, Jessica A.; Burbank, Douglas W.; Yang, Xiaodong	Active flexural-slip faulting: A study from the Pamir-Tian Shan convergent zone, NW China	JOURNAL OF GEOPHYSICAL RESEARCH-SOLID EARTH	2169-9313	2169-9356		JUN	2015	120	6	4359	4378		10.1002/2014JB011632	WOS:000357993000021
J	Jiang, B; Larsen, L; Deal, B; Sullivan, WC	Jiang, Bin; Larsen, Linda; Deal, Brian; Sullivan, William C.	A dose-response curve describing the relationship between tree cover density and landscape preference	LANDSCAPE AND URBAN PLANNING	0169-2046	1872-6062		JUL	2015	139		16	25		10.1016/j.landurbplan.2015.02.018	WOS:000355353200002
J	Waltham, NJ; Sheaves, M	Waltham, Nathan J.; Sheaves, Marcus	Expanding coastal urban and industrial seascape in the Great Barrier Reef World Heritage Area: Critical need for coordinated planning and policy	MARINE POLICY	0308-597X	1872-9460		JUL	2015	57		78	84		10.1016/j.marpol.2015.03.030	WOS:000356740100011
J	Sokol, E; Kramer, D; Diercks, GFH; Kuipers, J; Jonkman, MF; Pas, HH; Giepmans, BG	Sokol, Ena; Kramer, Duco; Diercks, Gilles F. H.; Kuipers, Jeroen; Jonkman, Marcel F.; Pas, Hendri H.; Giepmans, Ben N. G.	Large-Scale Electron Microscopy Maps of Patient Skin and Mucosa Provide Insight into Pathogenesis of Blistering Diseases	JOURNAL OF INVESTIGATIVE DERMATOLOGY	0022-202X	1523-1747		JUL	2015	135	7	1763	1770		10.1038/jid.2015.109	WOS:000356180100015	25789704
J	Samal, AK; Srivastava, RK; Sinha, LK	Samal, Amiya K.; Srivastava, Rajesh K.; Sinha, Lokesh K.	ArcGIS studies and field relationships of Paleoproterozoic mafic dyke swarms from the south of Devarakonda area, Eastern Dharwar Craton, southern India: Implications for their relative ages	JOURNAL OF EARTH SYSTEM SCIENCE	2347-4327	0973-774X		JUL	2015	124	5	1075	1084		10.1007/s12040-015-0595-4	WOS:000358329700012
J	Shubho, MTH; Islam, SR; Ayon, BD; Islam, I	Shubho, M. T. H.; Islam, S. R.; Ayon, B. D.; Islam, I.	An improved semiautomatic segmentation approach to land cover mapping for identification of land cover change and trend	INTERNATIONAL JOURNAL OF ENVIRONMENTAL SCIENCE AND TECHNOLOGY	1735-1472	1735-2630		AUG	2015	12	8	2593	2602		10.1007/s13762-014-0649-1	WOS:000356155300016
J	Minn, M; Cutts, BB; Greenberg, JA; Pavlovic, N; Fraterrigo, JM; Turner, VK	Minn, Michael; Cutts, Bethany B.; Greenberg, Jonathan A.; Pavlovic, Nathan; Fraterrigo, Jennifer M.; Turner, V. Kelly	Detection of foreclosure-related landscape management changes using Landsat	APPLIED GEOGRAPHY	0143-6228	1873-7730		AUG	2015	62		217	224		10.1016/j.apgeog.2015.04.023	WOS:000360419800021
J	Ellis, MA; Barnes, JB	Ellis, Magdalena A.; Barnes, Jason B.	A global perspective on the topographic response to fault growth	GEOSPHERE	1553-040X			AUG	2015	11	4	1008	1023		10.1130/GES01156.1	WOS:000359480000003
J	McLain, MA; Chase, B; Bryant, E	McLain, Matthew A.; Chase, Brad; Bryant, Eric	PteroTerra: a searchable pterosaur database web application that interfaces with Google Earth	HISTORICAL BIOLOGY	0891-2963	1029-2381		AUG 18	2015	27	6	664	670		10.1080/08912963.2014.929671	WOS:000353553900004
J	Liu, CC; Chen, PL; Matsuo, T; Chen, CY	Liu, Cheng-Chien; Chen, Po-Li; Matsuo, Tomoya; Chen, Chen-Yu	Rapidly responding to landslides and debris flow events using a low-cost unmanned aerial vehicle	JOURNAL OF APPLIED REMOTE SENSING	1931-3195			AUG 21	2015	9				96016	10.1117/1.JRS.9.096016	WOS:000362567300002
J	Morris, C; Lee, SY; van de Merwe, J	Morris, C.; Lee, S. Y.; van de Merwe, J.	delta N-15 of estuarine fishes as a quantitative indicator of urbanization	ECOLOGICAL INDICATORS	1470-160X	1872-7034		SEP	2015	56		41	49		10.1016/j.ecolind.2015.03.028	WOS:000356743800006
J	Xu, C; Holmgren, M; Van Nes, EH; Maestre, FT; Soliveres, S; Berdugo, M; Kefi, S; Marquet, PA; Abades, S; Scheffer, M	Xu, Chi; Holmgren, Milena; Van Nes, Egbert H.; Maestre, Fernando T.; Soliveres, Santiago; Berdugo, Miguel; Kefi, Sonia; Marquet, Pablo A.; Abades, Sebastian; Scheffer, Marten	Can we infer plant facilitation from remote sensing? a test across global drylands	ECOLOGICAL APPLICATIONS	1051-0761	1939-5582		SEP	2015	25	6	1456	1462		10.1890/14-2358.1	WOS:000360813100002	26552256
J	Salvati, L; Ridolfi, E; Zambon, I; Serra, P; Sauri, D	Salvati, L.; Ridolfi, E.; Zambon, I; Serra, P.; Sauri, D.	Swimming Pools as Indicator of Urban Sprawl: An Exploratory Analysis in a Mediterranean City	INTERNATIONAL JOURNAL OF ENVIRONMENTAL RESEARCH	1735-6865	2008-2304		FAL	2015	9	4	1325	1332			WOS:000369638700024
J	Chung, HW; Liu, CC; Cheng, IF; Lee, YR; Shieh, MC	Chung, Hsiao-Wei; Liu, Cheng-Chien; Cheng, I-Fan; Lee, Yun-Ruei; Shieh, Ming-Chang	Rapid Response to a Typhoon-Induced Flood with an SAR- Derived Map of Inundated Areas: Case Study and Validation	REMOTE SENSING	2072-4292			SEP	2015	7	9	11954	11973		10.3390/rs70911954	WOS:000362511400046
J	See, L; Fritz, S; Perger, C; Schill, C; McCallum, I; Schepaschenko, D; Duerauer, M; Sturn, T; Kamer, M; Kraxner, F; Obersteiner, M	See, Linda; Fritz, Steffen; Perger, Christoph; Schill, Christian; McCallum, Ian; Schepaschenko, Dmitry; Duerauer, Martina; Sturn, Tobias; Kamer, Mathias; Kraxner, Florian; Obersteiner, Michael	Harnessing the power of volunteers, the internet and Google Earth to collect and validate global spatial information using Geo-Wiki	TECHNOLOGICAL FORECASTING AND SOCIAL CHANGE	0040-1625	1873-5509		SEP	2015	98		324	335		10.1016/j.techfore.2015.03.002	WOS:000362134000025
J	Lee, J	Lee, Jacqueline	Reconstruction of ancestral drainage patterns in an internally draining region, Fars Province, Iran	GEOLOGICAL MAGAZINE	0016-7568	1469-5081		SEP	2015	152	5	830	843		10.1017/S0016756814000685	WOS:000359265100005
J	Barragan, JM; de Andres, M	Manuel Barragan, Juan; de Andres, Maria	Analysis and trends of the world's coastal cities and agglomerations	OCEAN & COASTAL MANAGEMENT	0964-5691	1873-524X		SEP	2015	114		11	20		10.1016/j.ocecoaman.2015.06.004	WOS:000359502100002
J	Wise, N	Wise, Nicholas	PLACING SENSE OF COMMUNITY	JOURNAL OF COMMUNITY PSYCHOLOGY	0090-4392	1520-6629		SEP	2015	43	7	920	929		10.1002/jcop.21722	WOS:000359860300008
J	Madadi, MR; Azamathulla, HM; Yakhkeshi, M	Madadi, Mohamad Reza; Azamathulla, Hazi Mohammad; Yakhkeshi, Mahmood	Application of Google earth to investigate the change of flood inundation area due to flood detention dam	EARTH SCIENCE INFORMATICS	1865-0473	1865-0481		SEP	2015	8	3	627	638		10.1007/s12145-014-0197-8	WOS:000360693000013
J	Li, YH; Hu, C; Long, T	Li, YuanHao; Hu, Cheng; Long, Teng	A novel SAR interferometry processing method in high resolution spotlight SAR	JOURNAL OF ELECTROMAGNETIC WAVES AND APPLICATIONS	0920-5071	1569-3937		SEP 2	2015	29	13	1785	1802		10.1080/09205071.2015.1062052	WOS:000359837800011
J	Sethi, M	Sethi, Mahendra	Location of greenhouse gases (GHG) emissions from thermal power plants in India along the urban-rural continuum	JOURNAL OF CLEANER PRODUCTION	0959-6526	1879-1786		SEP 15	2015	103		586	600		10.1016/j.jclepro.2014.10.067	WOS:000356990800057
J	Lewis, A; Hilley, GE; Lewicki, JL	Lewis, A.; Hilley, G. E.; Lewicki, J. L.	Integrated thermal infrared imaging and structure-from-motion photogrammetry to map apparent temperature and radiant hydrothermal heat flux at Mammoth Mountain, CA, USA	JOURNAL OF VOLCANOLOGY AND GEOTHERMAL RESEARCH	0377-0273	1872-6097		SEP 15	2015	303		16	24		10.1016/j.jvolgeores.2015.07.025	WOS:000362608000003
J	Yao, XW; Han, JW; Guo, L; Bu, SH; Liu, ZB	Yao, Xiwen; Han, Junwei; Guo, Lei; Bu, Shuhui; Liu, Zhenbao	A coarse-to-fine model for airport detection from remote sensing images using target-oriented visual saliency and CRF	NEUROCOMPUTING	0925-2312	1872-8286		SEP 21	2015	164		162	172		10.1016/j.neucom.2015.02.073	WOS:000356987000015
J	Jandl, NM; Sprenger, A; Wojak, JF; Gottlich, M; Munte, TF; Kramer, UM; Helmchen, C	Jandl, N. M.; Sprenger, A.; Wojak, J. F.; Goettlich, M.; Muente, T. F.; Kraemer, U. M.; Helmchen, C.	DISSOCIABLE CEREBELLAR ACTIVITY DURING SPATIAL NAVIGATION AND VISUAL MEMORY IN BILATERAL VESTIBULAR FAILURE	NEUROSCIENCE	0306-4522	1873-7544		OCT 1	2015	305		257	267		10.1016/j.neuroscience.2015.07.089	WOS:000360547100023	26255675
J	Zaidi, FK; Mukhopadhyay, M	Zaidi, Faisal K.; Mukhopadhyay, Manoj	Morphometric analysis of the Scoria Cones and drainage pattern for the Quaternary and older Volcanic Fields in parts of the Large Igneous Province (LIP), Saudi Arabia	JOURNAL OF AFRICAN EARTH SCIENCES	1464-343X	1879-1956		OCT	2015	110		1	13		10.1016/j.jafrearsci.2015.06.010	WOS:000360871400001
J	Zhong, B; Yang, AX; Nie, AH; Yao, YJ; Zhang, H; Wu, SL; Liu, QH	Zhong, Bo; Yang, Aixia; Nie, Aihua; Yao, Yanjuan; Zhang, Hang; Wu, Shanlong; Liu, Qinhuo	Finer Resolution Land-Cover Mapping Using Multiple Classifiers and Multisource Remotely Sensed Data in the Heihe River Basin	IEEE JOURNAL OF SELECTED TOPICS IN APPLIED EARTH OBSERVATIONS AND REMOTE SENSING	1939-1404	2151-1535		OCT	2015	8	10	4973	4992		10.1109/JSTARS.2015.2461453	WOS:000368904000034
J	Asfaha, TG; Frankl, A; Haile, M; Zenebe, A; Nyssen, J	Asfaha, Tesfaalem G.; Frankl, Amaury; Haile, Mitiku; Zenebe, Amanuel; Nyssen, Jan	Determinants of peak discharge in steep mountain catchments - Case of the Rift Valley escarpment of Northern Ethiopia	JOURNAL OF HYDROLOGY	0022-1694	1879-2707		OCT	2015	529		1725	1739		10.1016/j.jhydrol.2015.08.013	WOS:000364249500083
J	Demissie, B; Frankl, A; Haile, M; Nyssen, J	Demissie, Biadgilgn; Frankl, Amaury; Haile, Mitiku; Nyssen, Jan	Biophysical Controlling Factors in Upper Catchments and Braided Rivers in Drylands: The Case of a Marginal Graben of the Ethiopian Rift Valley	LAND DEGRADATION & DEVELOPMENT	1085-3278	1099-145X		OCT	2015	26	7	748	758		10.1002/ldr.2357	WOS:000363449400012
J	Jacobson, A; Dhanota, J; Godfrey, J; Jacobson, H; Rossman, Z; Stanish, A; Walker, H; Riggio, J	Jacobson, Andrew; Dhanota, Jasjeet; Godfrey, Jessie; Jacobson, Hannah; Rossman, Zoe; Stanish, Andrew; Walker, Hannah; Riggio, Jason	A novel approach to mapping land conversion using Google Earth with an application to East Africa	ENVIRONMENTAL MODELLING & SOFTWARE	1364-8152	1873-6726		OCT	2015	72		1	9		10.1016/j.envsoft.2015.06.011	WOS:000361906400001
J	Curtis, A; Ye, XY; Hachey, K; Bourdeaux, M; Norris, A	Curtis, Andrew; Ye, Xinyue; Hachey, Kevin; Bourdeaux, Margaret; Norris, Alison	A space-time analysis of the WikiLeaks Afghan War Diary: a resource for analyzing the conflict-health nexus	INTERNATIONAL JOURNAL OF HEALTH GEOGRAPHICS	1476-072X			OCT 16	2015	14				29	10.1186/s12942-015-0022-8	WOS:000362870200001	26475472
J	Borrelli, L; Cofone, G; Coscarelli, R; Gulla, G	Borrelli, Luigi; Cofone, Gino; Coscarelli, Roberto; Gulla, Giovanni	Shallow landslides triggered by consecutive rainfall events at Catanzaro strait (Calabria-Southern Italy)	JOURNAL OF MAPS	1744-5647			OCT 20	2015	11	5	730	744		10.1080/17445647.2014.943814	WOS:000359772800005
J	Hedberg, N; Kautsky, N; Hellstrom, M; Tedengren, M	Hedberg, Nils; Kautsky, Nils; Hellstrom, Micaela; Tedengren, Michael	Spatial correlation and potential conflicts between sea cage farms and coral reefs in South East Asia	AQUACULTURE	0044-8486	1873-5622		NOV 1	2015	448		418	426		10.1016/j.aquaculture.2015.06.024	WOS:000360189000054
J	Roy, S; Sahu, AS	Roy, Suvendu; Sahu, Abhay Sankar	Quaternary tectonic control on channel morphology over sedimentary low land: A case study in the Ajay-Damodar interfluve of Eastern India	GEOSCIENCE FRONTIERS	1674-9871			NOV	2015	6	6	927	946		10.1016/j.gsf.2015.04.001	WOS:000365934400012
J	Mishra, NB; Crews, KA; Neeti, N; Meyer, T; Young, KR	Mishra, Niti B.; Crews, Kelley A.; Neeti, Neeti; Meyer, Thoralf; Young, Kenneth R.	MODIS derived vegetation greenness trends in African Savanna: Deconstructing and localizing the role of changing moisture availability, fire regime and anthropogenic impact	REMOTE SENSING OF ENVIRONMENT	0034-4257	1879-0704		NOV	2015	169		192	204		10.1016/j.rse.2015.08.008	WOS:000363815900014
J	Zakerinejad, R; Maerker, M	Zakerinejad, Reza; Maerker, Michael	An integrated assessment of soil erosion dynamics with special emphasis on gully erosion in the Mazayjan basin, southwestern Iran	NATURAL HAZARDS	0921-030X	1573-0840		NOV	2015	79		S25	S50		10.1007/s11069-015-1700-3	WOS:000364528800003
J	Hofherr, J; Natale, F; Trujillo, P	Hofherr, Johann; Natale, Fabrizio; Trujillo, Pablo	Is lack of space a limiting factor for the development of aquaculture in EU coastal areas?	OCEAN & COASTAL MANAGEMENT	0964-5691	1873-524X		NOV	2015	116		27	36		10.1016/j.ocecoaman.2015.06.010	WOS:000364436700004
J	Goeminne, PC; Nawrot, TS; De Boeck, K; Nemery, B; Dupont, LJ	Goeminne, Pieter C.; Nawrot, Tim S.; De Boeck, Kris; Nemery, Ben; Dupont, Lieven J.	Proximity to blue spaces and risk of infection with Pseudomonas aeruginosa in cystic fibrosis: A case-control analysis	JOURNAL OF CYSTIC FIBROSIS	1569-1993	1873-5010		NOV	2015	14	6	741	747		10.1016/j.jcf.2015.04.004	WOS:000366228800011	25940953
J	Masthi, NRR; Madhusudan, M; Puthussery, YP	Masthi, N. R. Ramesh; Madhusudan, M.; Puthussery, Yannick P.	Global positioning system & Google Earth in the investigation of an outbreak of cholera in a village of Bengaluru Urban district, Karnataka	INDIAN JOURNAL OF MEDICAL RESEARCH	0971-5916			NOV	2015	142		533	537		10.4103/0971-5916.171277	WOS:000366330000007	26658586
J	Liu, CC; Chen, YH; Wen, HL	Liu, Cheng-Chien; Chen, Yi-Hsin; Wen, Hui-Lin	Supporting the annual international black-faced spoonbill census with a low-cost unmanned aerial vehicle	ECOLOGICAL INFORMATICS	1574-9541	1878-0512		NOV	2015	30		170	178		10.1016/j.ecoinf.2015.10.008	WOS:000366876400019
J	Pearson, AL; Rzotkiewicz, A; Zwickle, A	Pearson, Amber L.; Rzotkiewicz, Amanda; Zwickle, Adam	Using remote, spatial techniques to select a random household sample in a dispersed, semi-nomadic pastoral community: utility for a longitudinal health and demographic surveillance system	INTERNATIONAL JOURNAL OF HEALTH GEOGRAPHICS	1476-072X			NOV 14	2015	14				33	10.1186/s12942-015-0026-4	WOS:000364777300001	26572873
J	Asfaha, TG; Frankl, A; Haile, M; Zenebe, A; Nyssen, J	Asfaha, Tesfaalem G.; Frankl, Amaury; Haile, Mitiku; Zenebe, Amanuel; Nyssen, Jan	Sediment flux dynamics as fingerprints of catchment rehabilitation: The case of western Rift Valley escarpment of northern Ethiopia	GEOMORPHOLOGY	0169-555X	1872-695X		DEC 1	2015	250		220	235		10.1016/j.geomorph.2015.09.004	WOS:000364266800017
J	Dordevic, MM; Whitmeyer, SJ	Dordevic, Mladen M.; Whitmeyer, Steven J.	MaRGEE: Move and Rotate Google Earth Elements	COMPUTERS & GEOSCIENCES	0098-3004	1873-7803		DEC	2015	85		1	9		10.1016/j.cageo.2015.09.004	WOS:000365051100001
J	Chaabout, S; Aoudjehane, HC; Reimold, WU; Baratoux, D; Youbi, N	Chaabout, Souad; Aoudjehane, Hasnaa Chennaoui; Reimold, Wolf Uwe; Baratoux, David; Youbi, Nasrrddine	Prospecting for possible impact structures in Morocco	JOURNAL OF AFRICAN EARTH SCIENCES	1464-343X	1879-1956		DEC	2015	112		339	352		10.1016/j.jafrearsci.2015.08.002	WOS:000367410400024
J	Nagai, H; Fujita, K; Sakai, A; Nuimura, T; Tadono, T	Nagai, H.; Fujita, K.; Sakai, A.; Nuimura, T.; Tadono, T.	Comparison of multiple glacier inventories with a new inventory derived from high-resolution ALOS imagery in the Bhutan Himalaya	CRYOSPHERE	1994-0416	1994-0424			2016	10	1	65	85		10.5194/tc-10-65-2016	WOS:000377602600005
J	Tobias, S; Buser, T; Buchecker, M	Tobias, Silvia; Buser, Tobias; Buchecker, Matthias	Does real-time visualization support local stakeholders in developing landscape visions?	ENVIRONMENT AND PLANNING B-PLANNING & DESIGN	0265-8135	1472-3417		JAN	2016	43	1	184	197		10.1177/0265813515603866	WOS:000368085900010
J	Cheng, YQ; Yu, L; Cracknell, AP; Gong, P	Cheng, Yuqi; Yu, Le; Cracknell, Arthur P.; Gong, Peng	Oil palm mapping using Landsat and PALSAR: a case study in Malaysia	INTERNATIONAL JOURNAL OF REMOTE SENSING	0143-1161	1366-5901			2016	37	22	5431	5442		10.1080/01431161.2016.1241448	WOS:000385631700010
J	Asfaha, TG; Frankl, A; Haile, M; Nyssen, J	Asfaha, Tesfaalem G.; Frankl, Amaury; Haile, Mitiku; Nyssen, Jan	Catchment Rehabilitation and Hydro-geomorphic Characteristics of Mountain Streams in the Western Rift Valley Escarpment of Northern Ethiopia	LAND DEGRADATION & DEVELOPMENT	1085-3278	1099-145X		JAN	2016	27	1	26	34		10.1002/ldr.2267	WOS:000368588900003
J	Yan, L; Roy, DP	Yan, L.; Roy, D. P.	Conterminous United States crop field size quantification from multi-temporal Landsat data	REMOTE SENSING OF ENVIRONMENT	0034-4257	1879-0704		JAN	2016	172		67	86		10.1016/j.rse.2015.10.034	WOS:000366764500006
J	Ucar, Z; Bettinger, P; Merry, K; Siry, J; Bowker, JM; Akbulut, R	Ucar, Zennure; Bettinger, Pete; Merry, Krista; Siry, Jacek; Bowker, J. M.; Akbulut, Ramazan	A comparison of two sampling approaches for assessing the urban forest canopy cover from aerial photography	URBAN FORESTRY & URBAN GREENING	1618-8667				2016	16		221	230		10.1016/j.ufug.2016.03.001	WOS:000384913200024
J	Zhao, SM; Cheng, WM; Liu, HJ; Xia, Y; Chai, HX; Song, Y; Zhang, WJ; You, T	Zhao, Shang-min; Cheng, Wei-ming; Liu, Hai-jiang; Xia, Yao; Chai, Hui-xia; Song, Yang; Zhang, Wen-jie; You, Tian	Land Use Transformation Rule Analysis in Beijing-Tianjin-Tangshan Region Using Remote Sensing and GIS Technology	JOURNAL OF SENSORS	1687-725X	1687-7268			2016	2016				6756295	10.1155/2016/6756295	WOS:000367981400001
J	Aguilar, FJ; Nemmaoui, A; Aguilar, MA; Chourak, M; Zarhloule, Y; Lorca, AMG	Aguilar, Fernando J.; Nemmaoui, Abderrahim; Aguilar, Manuel A.; Chourak, Mimoun; Zarhloule, Yassine; Garcia Lorca, Andres M.	A Quantitative Assessment of Forest Cover Change in the Moulouya River Watershed (Morocco) by the Integration of a Subpixel-Based and Object-Based Analysis of Landsat Data	FORESTS		1999-4907		JAN	2016	7	1			23	10.3390/f7010023	WOS:000369493700013
J	Guan, XD; Huang, C; Liu, GH; Meng, XL; Liu, QS	Guan, Xudong; Huang, Chong; Liu, Gaohuan; Meng, Xuelian; Liu, Qingsheng	Mapping Rice Cropping Systems in Vietnam Using an NDVI-Based Time-Series Similarity Measurement Based on DTW Distance	REMOTE SENSING		2072-4292		JAN	2016	8	1			19	10.3390/rs8010019	WOS:000369494500042
J	Kobayashi, T; Tsend-Ayush, J; Tateishi, R	Kobayashi, Toshiyuki; Tsend-Ayush, Javzandulam; Tateishi, Ryutaro	A new global tree-cover percentage map using MODIS data	INTERNATIONAL JOURNAL OF REMOTE SENSING	0143-1161	1366-5901			2016	37	4	969	992		10.1080/01431161.2016.1142684	WOS:000370346200014
J	Aggarwal, A	Aggarwal, Arpit	Exposure, hazard and risk mapping during a flood event using open source geospatial technology	GEOMATICS NATURAL HAZARDS & RISK	1947-5705	1947-5713			2016	7	4	1426	1441		10.1080/19475705.2015.1069408	WOS:000374902000012
J	Sadr, K	Sadr, Karim	The Impact of Coder Reliability on Reconstructing Archaeological Settlement Patterns from Satellite Imagery: a Case Study from South Africa	ARCHAEOLOGICAL PROSPECTION	1075-2196	1099-0763		JAN-MAR	2016	23	1	45	54		10.1002/arp.1515	WOS:000377608300004
J	Vakhshoori, V; Zare, M	Vakhshoori, V.; Zare, M.	Landslide susceptibility mapping by comparing weight of evidence, fuzzy logic, and frequency ratio methods	GEOMATICS NATURAL HAZARDS & RISK	1947-5705	1947-5713			2016	7	5	1731	1752		10.1080/19475705.2016.1144655	WOS:000380171900016
J	Bentley, GC; McCutcheon, P; Cromley, RG; Hanink, DM	Bentley, George C.; McCutcheon, Priscilla; Cromley, Robert G.; Hanink, Dean M.	Fitzgerald: A Return to the Neighborhood and Its Contemporary Structural and Geographical Contexts	PROFESSIONAL GEOGRAPHER	0033-0124	1467-9272			2016	68	3	414	426			WOS:000383877300007
J	Cave, JAS; Ballantyne, CK	Cave, James A. S.; Ballantyne, Colin K.	Catastrophic Rock-Slope Failures in NW Scotland: Quantitative Analysis and Implications	SCOTTISH GEOGRAPHICAL JOURNAL	1470-2541	1751-665X			2016	132	3-4	185	209		10.1080/14702541.2016.1156148	WOS:000385670800002
J	Li, YA; Li, YK; Chen, YX; Lu, XY	Li, Yanan; Li, Yingkui; Chen, Yixin; Lu, Xiaoyu	Presumed Little Ice Age glacial extent in the eastern Tian Shan, China	JOURNAL OF MAPS	1744-5647				2016	12		71	78		10.1080/17445647.2016.1158595	WOS:000388817100009
J	Pena-Monne, JL; Sampietro-Vattuone, MM	Luis Pena-Monne, Jose; Marta Sampietro-Vattuone, Maria	Geomorphology of the alluvial fans in Colalao del Valle-Quilmes area (Santa Maria Valley, Tucuman Province, Argentina)	JOURNAL OF MAPS	1744-5647				2016	12		460	465		10.1080/17445647.2016.1239230	WOS:000388817100055
J	Marker, M; Hochschild, V; Maca, V; Vilimek, V	Maerker, Michael; Hochschild, Volker; Maca, Vit; Vilimek, Vit	STOCHASTIC ASSESSMENT OF LANDSLIDES AND DEBRIS FLOWS IN THE JEMMA BASIN, BLUE NILE, CENTRAL ETHIOPIA	GEOGRAFIA FISICA E DINAMICA QUATERNARIA	0391-9838	1724-4781			2016	39	1	51	58		10.4461/GFDQ.2014.395	WOS:000389169500005
J	Chen, RR; Zhou, SZ; Li, YK; Deng, YB	Chen, Renrong; Zhou, Shangzhe; Li, Yingkui; Deng, Yingbin	Glacial geomorphology of the Parlung Zangbo Valley, southeastern Tibetan Plateau	JOURNAL OF MAPS	1744-5647				2016	12	5	716	724		10.1080/17445647.2015.1069765	WOS:000389542600002
J	Tickner, A	Tickner, Amanda	The Liquid Galaxy in the library A study of use and users of interactive digital display technology at UNC-CH	LIBRARY HI TECH	0737-8831				2016	34	4	657	668		10.1108/LHT-04-2016-0045	WOS:000392187600006
J	Agapiou, A; Papadopoulos, N; Sarris, A	Agapiou, Athos; Papadopoulos, Nikos; Sarris, Apostolos	Detection of olive oil mill waste (OOMW) disposal areas using high resolution GeoEye's OrbView-3 and Google Earth images	OPEN GEOSCIENCES	2391-5447			JAN	2016	8	1	700	710		10.1515/geo-2016-0067	WOS:000394243400016
J	Arifin, MH; Jamaluddin, TA; Husin, H; Ismail, A; Abbas, AA; Nordin, MNM; Baioumy, HM; Kayode, JS; Ismail, N; Othman, NA; Setu, A; Sulaiman, MAA	Arifin, Mohd Hariri; Jamaluddin, Tajul Anuar; Husin, Hamzah; Ismail, Azmi; Abbas, Amry Amin; Nordin, Mohd Nawawi Mohd; Baioumy, Hassan Mohamed; Kayode, John Stephen; Ismail, Nadzari; Othman, Nor Azura; Setu, Anita; Sulaiman, Mohd Amir Ashraf	Comparison of Geological Mapping with Electrical Resistivity and Ground Penetration Radar Methods for Rock Fractured System Study	CHIANG MAI JOURNAL OF SCIENCE	0125-2526				2016	43	6	1346	1357			WOS:000395907600014
J	Aggarwal, A; Jain, SK; Lohani, AK; Jain, N	Aggarwal, Arpit; Jain, Sanjay K.; Lohani, Anil K.; Jain, Neha	Glacial lake outburst flood risk assessment using combined approaches of remote sensing, GIS and dam break modelling	GEOMATICS NATURAL HAZARDS & RISK	1947-5705	1947-5713		JAN 2	2016	7	1	18	36		10.1080/19475705.2013.862573	WOS:000367536300002
J	Van Deventer, H; Nel, J; Maherry, A; Mbona, N	Van Deventer, H.; Nel, J.; Maherry, A.; Mbona, N.	Using the landform tool to calculate landforms for hydrogeomorphic wetland classification at a country-wide scale	SOUTH AFRICAN GEOGRAPHICAL JOURNAL	0373-6245	2151-2418		JAN 2	2016	98	1	138	153		10.1080/03736245.2014.977812	WOS:000370881000009
J	Ni, WP; Gao, XB; Wang, Y	Ni, Weiping; Gao, Xinbo; Wang, Ying	Single satellite image dehazing via linear intensity transformation and local property analysis	NEUROCOMPUTING	0925-2312	1872-8286		JAN 29	2016	175		25	39		10.1016/j.neucom.2015.10.010	WOS:000367756600003
J	Liu, B; Yang, L; Yang, F; Wang, Q; Yang, YZ; Lu, YH; Gardiner, MM	Liu, Bing; Yang, Long; Yang, Fan; Wang, Qian; Yang, Yizhong; Lu, Yanhui; Gardiner, Mary M.	Landscape diversity enhances parasitism of cotton bollworm (Helicoverpa armigera) eggs by Trichogramma chilonis in cotton	BIOLOGICAL CONTROL	1049-9644	1090-2112		FEB	2016	93		15	23		10.1016/j.biocontrol.2015.11.004	WOS:000368553800003
J	Richter, GM; Agostini, F; Barker, A; Costomiris, D; Qi, AM	Richter, Goetz M.; Agostini, Francesco; Barker, Alexandra; Costomiris, Delphine; Qi, Aiming	Assessing on-farm productivity of Miscanthus crops by combining soil mapping, yield modelling and remote sensing	BIOMASS & BIOENERGY	0961-9534	1873-2909		FEB	2016	85		252	261		10.1016/j.biombioe.2015.12.024	WOS:000368435800031
J	Kanoua, W; Merkel, BJ	Kanoua, Wael; Merkel, Broder J.	Modification of a digital elevation model (DEM) in a flat topographic area with respect to manmade features	GEOSCIENCES JOURNAL	1226-4806	1598-7477		FEB	2016	20	1	101	115		10.1007/s12303-015-0020-7	WOS:000372255800008
J	Kim, DJ; Hensley, S; Yun, SH; Neumann, M	Kim, Duk-jin; Hensley, Scott; Yun, Sang-Ho; Neumann, Maxim	Detection of Durable and Permanent Changes in Urban Areas Using Multitemporal Polarimetric UAVSAR Data	IEEE GEOSCIENCE AND REMOTE SENSING LETTERS	1545-598X	1558-0571		FEB	2016	13	2	267	271		10.1109/LGRS.2015.2509080	WOS:000369483500030
J	Blank, LM; Almquist, H; Estrada, J; Crews, J	Blank, Lisa M.; Almquist, Heather; Estrada, Jen; Crews, Jeff	Factors Affecting Student Success with a Google Earth-Based Earth Science Curriculum	JOURNAL OF SCIENCE EDUCATION AND TECHNOLOGY	1059-0145	1573-1839		FEB	2016	25	1	77	90		10.1007/s10956-015-9578-0	WOS:000368689300006
J	Mildrexler, D; Yang, ZQ; Cohen, WB; Bell, DM	Mildrexler, David; Yang, Zhiqiang; Cohen, Warren B.; Bell, David M.	A forest vulnerability index based on drought and high temperatures	REMOTE SENSING OF ENVIRONMENT	0034-4257	1879-0704		FEB	2016	173		314	325		10.1016/j.rse.2015.11.024	WOS:000369200900028
J	Jara-Munoz, J; Melnick, D; Strecker, MR	Jara-Munoz, Julius; Melnick, Daniel; Strecker, Manfred R.	TerraceM: A MATLAB (R) tool to analyze marine and lacustrine terraces using high-resolution topography	GEOSPHERE	1553-040X			FEB	2016	12	1	176	195		10.1130/GES01208.1	WOS:000369539200008
J	Yu, YT; Guan, HY; Zai, DW; Ji, Z	Yu, Yongtao; Guan, Haiyan; Zai, Dawei; Ji, Zheng	Rotation-and-scale-invariant airplane detection in high-resolution satellite images based on deep-Hough-forests	ISPRS JOURNAL OF PHOTOGRAMMETRY AND REMOTE SENSING	0924-2716	1872-8235		FEB	2016	112		50	64		10.1016/j.isprsjprs.2015.04.014	WOS:000370092700005
J	Tsutsumida, N; Comber, A; Barrett, K; Saizen, I; Rustiadi, E	Tsutsumida, Narumasa; Comber, Alexis; Barrett, Kirsten; Saizen, Izuru; Rustiadi, Ernan	Sub-Pixel Classification of MODIS EVI for Annual Mappings of Impervious Surface Areas	REMOTE SENSING		2072-4292		FEB	2016	8	2			143	10.3390/rs8020143	WOS:000371898800041
J	Alexandre, PM; Stewart, SI; Mockrin, MH; Keuler, NS; Syphard, AD; Bar-Massada, A; Clayton, MK; Radeloff, VC	Alexandre, Patricia M.; Stewart, Susan I.; Mockrin, Miranda H.; Keuler, Nicholas S.; Syphard, Alexandra D.; Bar-Massada, Avi; Clayton, Murray K.; Radeloff, Volker C.	The relative impacts of vegetation, topography and spatial arrangement on building loss to wildfires in case studies of California and Colorado	LANDSCAPE ECOLOGY	0921-2973	1572-9761		FEB	2016	31	2	415	430		10.1007/s10980-015-0257-6	WOS:000372318900016
J	Zhu, LF; Pan, X; Gao, GC	Zhu, Liangfeng; Pan, Xin; Gao, Gongcheng	Assessing Place Location Knowledge Using a Virtual Globe	JOURNAL OF GEOGRAPHY	0022-1341	1752-6868		MAR-APR	2016	115	2	72	80		10.1080/00221341.2015.1043930	WOS:000369641700004
J	Callaway, L; Tregloan, K; Williams, G; Clark, R	Callaway, Libby; Tregloan, Kate; Williams, Gavin; Clark, Ross	Evaluating Access and Mobility within a New Model of Supported Housing for People with Neurotrauma: A Pilot Study	BRAIN IMPAIRMENT	1443-9646	1839-5252		MAR	2016	17	1	64	76		10.1017/BrImp.2016.7	WOS:000375018500007
J	Zhu, LF; Kan, WS; Zhang, Y; Sun, JZ	Zhu, Liangfeng; Kan, Wensheng; Zhang, Yu; Sun, Jianzhong	Visualizing the Structure of the Earth's Lithosphere on the Google Earth Virtual-Globe Platform	ISPRS INTERNATIONAL JOURNAL OF GEO-INFORMATION	2220-9964			MAR	2016	5	3			26	10.3390/ijgi5030026	WOS:000373367400005
J	Jin, N; Tao, B; Ren, W; Feng, MC; Sun, R; He, L; Zhuang, W; Yu, Q	Jin, Ning; Tao, Bo; Ren, Wei; Feng, Meichen; Sun, Rui; He, Liang; Zhuang, Wei; Yu, Qiang	Mapping Irrigated and Rainfed Wheat Areas Using Multi-Temporal Satellite Data	REMOTE SENSING		2072-4292		MAR	2016	8	3			207	10.3390/rs8030207	WOS:000373627400010
J	Karrow, T; Suffling, R	Karrow, Thomas; Suffling, Roger	Pre-settlement vegetation maps generated using Ontario early survey: An online database providing enhanced map access for researchers	CANADIAN GEOGRAPHER-GEOGRAPHE CANADIEN	0008-3658	1541-0064		SPR	2016	60	1	135	148		10.1111/cag.12251	WOS:000372275100020
J	Mermoz, S; Toan, TL	Mermoz, Stephane; Thuy Le Toan	Forest Disturbances and Regrowth Assessment Using ALOS PALSAR Data from 2007 to 2010 in Vietnam, Cambodia and Lao PDR	REMOTE SENSING		2072-4292		MAR	2016	8	3			217	10.3390/rs8030217	WOS:000373627400096
J	Izmailova, AV	Izmailova, A. V.	Lake Water Resources of the European Part of the Russian Federation	WATER RESOURCES	0097-8078	1608-344X		MAR	2016	43	2	259	269		10.1134/S0097807816020032	WOS:000384140600002
J	Danby, S; Davidson, C; Ekberg, S; Breathnach, H; Thorpe, K	Danby, Susan; Davidson, Christina; Ekberg, Stuart; Breathnach, Helen; Thorpe, Karen	'Let's see if you can see me': making connections with Google Earth (TM) in a preschool classroom	CHILDRENS GEOGRAPHIES	1473-3285	1473-3277		MAR 3	2016	14	2	141	157		10.1080/14733285.2015.1126231	WOS:000370670800002
J	Sarmiento, GNR; Cipolletti, MP; Perillo, MM; Delrieux, CA; Perillo, GME	Revollo Sarmiento, G. N.; Cipolletti, M. P.; Perillo, M. M.; Delrieux, C. A.; Perillo, Gerardo M. E.	Methodology for classification of geographical features with remote sensing images: Application to tidal flats	GEOMORPHOLOGY	0169-555X	1872-695X		MAR 15	2016	257		10	22		10.1016/j.geomorph.2015.12.020	WOS:000372378300002
J	Zhou, YT; Xiao, XM; Qin, YW; Dong, JW; Zhang, GL; Kou, WL; Jin, C; Wang, J; Li, XP	Zhou, Yuting; Xiao, Xiangming; Qin, Yuanwei; Dong, Jinwei; Zhang, Geli; Kou, Weili; Jin, Cui; Wang, Jie; Li, Xiangping	Mapping paddy rice planting area in rice-wetland coexistent areas through analysis of Landsat 8 OLI and MODIS images	INTERNATIONAL JOURNAL OF APPLIED EARTH OBSERVATION AND GEOINFORMATION	0303-2434			APR	2016	46		1	12		10.1016/j.jag.2015.11.001	WOS:000369206900001	27688742
J	Yu, M; Huang, Y; Xu, Q; Guo, P; Dai, ZL	Yu, Miao; Huang, Yu; Xu, Qiang; Guo, Peng; Dai, Zili	Application of virtual earth in 3D terrain modeling to visual analysis of large-scale geological disasters in mountainous areas	ENVIRONMENTAL EARTH SCIENCES	1866-6280	1866-6299		APR	2016	75	7			563	10.1007/s12665-015-5161-5	WOS:000373635400022
J	Butsic, V; Brenner, JC	Butsic, Van; Brenner, Jacob C.	Cannabis (Cannabis sativa or C. indica) agriculture and the environment: a systematic, spatially-explicit survey and potential impacts	ENVIRONMENTAL RESEARCH LETTERS	1748-9326			APR	2016	11	4			44023	10.1088/1748-9326/11/4/044023	WOS:000375746800027
J	Lindquist, M; Lange, E; Kang, J	Lindquist, Mark; Lange, Eckart; Kang, Jian	From 3D landscape visualization to environmental simulation: The contribution of sound to the perception of virtual environments	LANDSCAPE AND URBAN PLANNING	0169-2046	1872-6062		APR	2016	148		216	231		10.1016/j.landurbplan.2015.12.017	WOS:000372683800020
J	Guo, ZL; Shao, XW; Xu, YW; Miyazaki, H; Ohira, W; Shibasaki, R	Guo, Zhiling; Shao, Xiaowei; Xu, Yongwei; Miyazaki, Hiroyuki; Ohira, Wataru; Shibasaki, Ryosuke	Identification of Village Building via Google Earth Images and Supervised Machine Learning Methods	REMOTE SENSING	2072-4292			APR	2016	8	4			271	10.3390/rs8040271	WOS:000375156500004
J	Heymsfield, E; Kuss, ML	Heymsfield, Ernie; Kuss, Mark L.	Supplementing Current Visual Highway Bridge Inspections with Gigapixel Technology	JOURNAL OF PERFORMANCE OF CONSTRUCTED FACILITIES	0887-3828	1943-5509		APR	2016	30	2			4015015	10.1061/(ASCE)CF.1943-5509.0000757	WOS:000372805300026
J	Levin, N	Levin, Noam	Human factors explain the majority of MODIS-derived trends in vegetation cover in Israel: a densely populated country in the eastern Mediterranean	REGIONAL ENVIRONMENTAL CHANGE	1436-3798	1436-378X		APR	2016	16	4	1197	1211		10.1007/s10113-015-0848-4	WOS:000373310600023
J	Haireti, A; Tateishi, R; Alsaaideh, B; Gharechelou, S	Haireti, Alifu; Tateishi, Ryutaro; Alsaaideh, Bayan; Gharechelou, Saeid	Multi-criteria technique for mapping of debris-covered and clean-ice glaciers in the Shaksgam valley using Landsat TM and ASTER GDEM	JOURNAL OF MOUNTAIN SCIENCE	1672-6316	1993-0321		APR	2016	13	4	703	714		10.1007/s11629-015-3649-9	WOS:000373882400011
J	De Paor, DG; Dordevic, MM; Karabinos, P; Tewksbury, BJ; Whitmeyer, SJ	De Paor, Declan G.; Dordevic, Mladen M.; Karabinos, Paul; Tewksbury, Barbara J.; Whitmeyer, Steven J.	The Fold Analysis Challenge: A virtual globe-based educational resource	JOURNAL OF STRUCTURAL GEOLOGY	0191-8141			APR	2016	85		85	94		10.1016/j.jsg.2016.02.005	WOS:000374079200007
J	Pulighe, G; Baiocchi, V; Lupia, F	Pulighe, Giuseppe; Baiocchi, Valerio; Lupia, Flavio	Horizontal accuracy assessment of very high resolution Google Earth images in the city of Rome, Italy	INTERNATIONAL JOURNAL OF DIGITAL EARTH	1753-8947	1753-8955		APR	2016	9	4	342	362		10.1080/17538947.2015.1031716	WOS:000374661000002
J	Bosquilia, RWD; Fiorio, PR; Duarte, SN; Barros, PPD	Duarte Bosquilia, Raoni Wainer; Fiorio, Peterson Ricardo; Duarte, Sergio Nascimento; Da Silva Barros, Pedro Paulo	DIFFERENT SATELLITE IMAGES FOR VISUAL MAPPING OF DRAINAGE AND SPRINGS IN CIRCULAR SAMPLES	INTERCIENCIA	0378-1844			APR	2016	41	4	254	259			WOS:000374804600006
J	Sadr, K	Sadr, Karim	A Comparison of Accuracy and Precision in Remote Sensing Stone-walled Structures with Google Earth, High Resolution Aerial Photography and LiDAR; a Case Study from the South African Iron Age	ARCHAEOLOGICAL PROSPECTION	1075-2196	1099-0763		APR-JUN	2016	23	2	95	104		10.1002/arp.1532	WOS:000383043800003
J	Qi, F; Zhai, JZ; Dang, GH	Qi, Feng; Zhai, John Z.; Dang, Gaihong	Building height estimation using Google Earth	ENERGY AND BUILDINGS	0378-7788	1872-6178		APR 15	2016	118		123	132		10.1016/j.enbuild.2016.02.044	WOS:000374369500013
J	Regmi, AD; Poudel, K	Regmi, Amar Deep; Poudel, Khagendra	Assessment of landslide susceptibility using GIS-based evidential belief function in Patu Khola watershed, Dang, Nepal	ENVIRONMENTAL EARTH SCIENCES	1866-6280	1866-6299		MAY	2016	75	9			743	10.1007/s12665-016-5562-0	WOS:000376030100020
J	Hentati, I; Triki, I; Trablesi, N; Zairi, M	Hentati, Imen; Triki, Ibtissem; Trablesi, Nadia; Zairi, Moncef	Piezometry mapping accuracy based on elevation extracted from various spatial data sources	ENVIRONMENTAL EARTH SCIENCES	1866-6280	1866-6299		MAY	2016	75	9			802	10.1007/s12665-016-5589-2	WOS:000376030100078
J	Shih, HC; Stow, DA; Weeks, JR; Coulter, LL	Shih, Hsiao-chien; Stow, Douglas A.; Weeks, John R.; Coulter, Lloyd L.	Determining the Type and Starting Time of Land Cover and Land Use Change in Southern Ghana Based on Discrete Analysis of Dense Landsat Image Time Series	IEEE JOURNAL OF SELECTED TOPICS IN APPLIED EARTH OBSERVATIONS AND REMOTE SENSING	1939-1404	2151-1535		MAY	2016	9	5	2064	2073		10.1109/JSTARS.2015.2504371	WOS:000375872200027
J	Sharma, RC; Tateishi, R; Hara, K; Iizuka, K	Sharma, Ram C.; Tateishi, Ryutaro; Hara, Keitarou; Iizuka, Kotaro	Production of the Japan 30-m Land Cover Map of 2013-2015 Using a Random Forests-Based Feature Optimization Approach	REMOTE SENSING		2072-4292		MAY	2016	8	5			429	10.3390/rs8050429	WOS:000378406400073
J	Karim, F; Petheram, C; Marvanek, S; Ticehurst, C; Wallace, J; Hasan, M	Karim, Fazlul; Petheram, Cuan; Marvanek, Steve; Ticehurst, Catherine; Wallace, Jim; Hasan, Masud	Impact of climate change on floodplain inundation and hydrological connectivity between wetlands and rivers in a tropical river catchment	HYDROLOGICAL PROCESSES	0885-6087	1099-1085		MAY 15	2016	30	10	1574	1593		10.1002/hyp.10714	WOS:000379192400008
J	Conoscenti, C; Rotigliano, E; Cama, M; Caraballo-Arias, NA; Lombardo, L; Agnesi, V	Conoscenti, Christian; Rotigliano, Edoardo; Cama, Mariaelena; Caraballo-Arias, Nathalie Almaru; Lombardo, Luigi; Agnesi, Valerio	Exploring the effect of absence selection on landslide susceptibility models: A case study in Sicily, Italy	GEOMORPHOLOGY	0169-555X	1872-695X		MAY 15	2016	261		222	235		10.1016/j.geomorph.2016.03.006	WOS:000374624300017
J	Antronico, L; Greco, R; Sorriso-Valvo, M	Antronico, Loredana; Greco, Roberto; Sorriso-Valvo, Marino	Recent alluvial fans in Calabria (southern Italy)	JOURNAL OF MAPS	1744-5647			MAY 26	2016	12	3	503	514		10.1080/17445647.2015.1047905	WOS:000372464100008
J	Hereher, ME; Ismael, H	Hereher, Mohamed E.; Ismael, Hossam	The application of remote sensing data to diagnose soil degradation in the Dakhla depression - Western Desert, Egypt	GEOCARTO INTERNATIONAL	1010-6049	1752-0762		MAY 27	2016	31	5	527	543		10.1080/10106049.2015.1059901	WOS:000370975800004
J	Tapete, D; Cigna, F; Donoghue, DNM	Tapete, Deodato; Cigna, Francesca; Donoghue, Daniel N. M.	'Looting marks' in space-borne SAR imagery: Measuring rates of archaeological looting in Apamea (Syria) with TerraSAR-X Staring Spotlight	REMOTE SENSING OF ENVIRONMENT	0034-4257	1879-0704		JUN 1	2016	178		42	58		10.1016/j.rse.2016.02.055	WOS:000375508200004
J	Liew, TS; Price, L; Clements, GR	Liew, Thor-Seng; Price, Liz; Clements, Gopalasamy Reuben	Using Google Earth to improve the management of threatened limestone karst ecosystems in Peninsular Malaysia	TROPICAL CONSERVATION SCIENCE	1940-0829			JUN	2016	9	2	903	920		10.1177/194008291600900219	WOS:000378888400019
J	Yurt, E; Tunkler, V	Yurt, Eyup; Tunkler, Vural	A Study on the Spatial Abilities of Prospective Social Studies Teachers: A Mixed Method Research	EDUCATIONAL SCIENCES-THEORY & PRACTICE	1303-0485	2148-7561		JUN	2016	16	3	965	986		10.12738/estp.2016.3.0324	WOS:000384646500011
J	Butt, M; Munawar, K; Bhatti, UI; Iqbal, S; Al-Saggaf, UM; Ochieng, W	Butt, Maaz; Munawar, Khalid; Bhatti, Umar I.; Iqbal, Sohail; Al-Saggaf, Ubaid M.; Ochieng, Washington	4D Trajectory Generation for Guidance Module of a UAV for a Gate-to-gate Flight in Presence of Turbulence	INTERNATIONAL JOURNAL OF ADVANCED ROBOTIC SYSTEMS	1729-8814			JUN 13	2016	13				125	10.5772/64063	WOS:000377819800002
J	Roberts, M; Hanrahan, P	Roberts, Mike; Hanrahan, Pat	Generating Dynamically Feasible Trajectories for Quadrotor Cameras	ACM TRANSACTIONS ON GRAPHICS	0730-0301	1557-7368		JUL	2016	35	4			61	10.1145/2897824.2925980	WOS:000380112400031
J	Ullah, S; Farooq, M; Shafique, M; Siyab, MA; Kareem, F; Dees, M	Ullah, Sami; Farooq, Muhammad; Shafique, Muhammad; Siyab, Muhammad Afra; Kareem, Fazli; Dees, Matthias	Spatial assessment of forest cover and land-use changes in the Hindu-Kush mountain ranges of northern Pakistan	JOURNAL OF MOUNTAIN SCIENCE	1672-6316	1993-0321		JUL	2016	13	7	1229	1237		10.1007/s11629-015-3456-3	WOS:000379268900008
J	Giovenco, DP; Duncan, DT; Coups, EJ; Lewis, MJ; Delnevo, CD	Giovenco, Daniel P.; Duncan, Dustin T.; Coups, Elliot J.; Lewis, M. Jane; Delnevo, Cristine D.	Census tract correlates of vape shop locations in New Jersey	HEALTH & PLACE	1353-8292	1873-2054		JUL	2016	40		123	128		10.1016/j.healthplace.2016.05.008	WOS:000379697500017	27261635
J	de Almeida, TSO; Fook, SML; Franca, FOD; Monteiro, TMR; Silva, EL; Gomes, LCF; Farias, AMG	Oliveira de Almeida, Thassiany Sarmento; Lia Fook, Sayonara Maria; de Siqueira Franca, Francisco Oscar; Ribeiro Monteiro, Tania Maria; Silva, Edwirde Luiz; Felix Gomes, Lidiane Cristina; Galdino Farias, Aline Maiara	Spatial distribution of scorpions according to the socioeconomic conditions in Campina Grande, State of Paraiba, Brazil	REVISTA DA SOCIEDADE BRASILEIRA DE MEDICINA TROPICAL	0037-8682			JUL-AUG	2016	49	4	477	485		10.1590/0037-8682-0128-2016	WOS:000382457200013	27598635
J	Principato, SM; Moyer, AN; Hampsch, AG; Ipsen, HA	Principato, Sarah M.; Moyer, Alexis N.; Hampsch, Alyson G.; Ipsen, Heather A.	Using GIS and streamlined landforms to interpret palaeo-ice flow in northern Iceland	BOREAS	0300-9483	1502-3885		JUL	2016	45	3	470	482		10.1111/bor.12164	WOS:000385404200007
J	Durand, NC; Robinson, JT; Shamim, MS; Machol, I; Mesirov, JP; Lander, ES; Aiden, EL	Durand, Neva C.; Robinson, James T.; Shamim, Muhammad S.; Machol, Ido; Mesirov, Jill P.; Lander, Eric S.; Aiden, Erez Lieberman	Juicebox Provides a Visualization System for Hi-C Contact Maps with Unlimited Zoom	CELL SYSTEMS	2405-4712	2405-4720		JUL 27	2016	3	1	99	101		10.1016/j.cels.2015.07.012	WOS:000395772700015	27467250
J	Vijay, V; Pimm, SL; Jenkins, CN; Smith, SJ	Vijay, Varsha; Pimm, Stuart L.; Jenkins, Clinton N.; Smith, Sharon J.	The Impacts of Oil Palm on Recent Deforestation and Biodiversity Loss	PLOS ONE	1932-6203			JUL 27	2016	11	7			e0159668	10.1371/journal.pone.0159668	WOS:000381515900046	27462984
J	Boardman, J	Boardman, John	The value of Google Earth (TM) for erosion mapping	CATENA	0341-8162	1872-6887		AUG	2016	143		123	127		10.1016/j.catena.2016.03.031	WOS:000376800800014
J	Ludwig, A; Meyer, H; Nauss, T	Ludwig, Annika; Meyer, Hanna; Nauss, Thomas	Automatic classification of Google Earth images for a larger scale monitoring of bush encroachment in South Africa	INTERNATIONAL JOURNAL OF APPLIED EARTH OBSERVATION AND GEOINFORMATION	1569-8432	1872-826X		AUG	2016	50		89	94		10.1016/j.jag.2016.03.003	WOS:000375819200009
J	Liu, TX; Zhang, SW; Xu, XL; Bu, K; Ning, J; Chang, LP	Liu Tingxiang; Zhang Shuwen; Xu Xinliang; Bu Kun; Ning Jia; Chang Liping	High resolution land cover datasets integration and application based on Landsat and Globcover data from 1975 to 2010 in Siberia	CHINESE GEOGRAPHICAL SCIENCE	1002-0063	1993-064X		AUG	2016	26	4	429	438		10.1007/s11769-016-0819-9	WOS:000380269900001
J	Webster, K; Arroyo-Mora, JP; Coomes, OT; Takasaki, Y; Abizaid, C	Webster, K.; Arroyo-Mora, J. P.; Coomes, O. T.; Takasaki, Y.; Abizaid, C.	A cost path and network analysis methodology to calculate distances along a complex river network in the Peruvian Amazon	APPLIED GEOGRAPHY	0143-6228	1873-7730		AUG	2016	73		13	25		10.1016/j.apgeog.2016.05.008	WOS:000381593000002
J	Ling, X; Zhang, YJ; Xiong, JX; Huang, X; Chen, ZP	Ling, Xiao; Zhang, Yongjun; Xiong, Jinxin; Huang, Xu; Chen, Zhipeng	An Image Matching Algorithm Integrating Global SRTM and Image Segmentation for Multi-Source Satellite Imagery	REMOTE SENSING		2072-4292		AUG	2016	8	8			672	10.3390/rs8080672	WOS:000382458700059
J	Du, HY; Song, XJ; Jiang, H; Kan, ZH; Wang, ZB; Cai, YL	Du Hongyu; Song Xuejun; Jiang Hong; Kan Zenghui; Wang Zhibao; Cai Yongli	Research on the cooling island effects of water body: A case study of Shanghai, China	ECOLOGICAL INDICATORS	1470-160X	1872-7034		AUG	2016	67		31	38		10.1016/j.ecolind.2016.02.040	WOS:000388785300004
J	Blamont, J	Blamont, Jacques	We the people: Consequences of the revolution in the management of space applications	SPACE POLICY	0265-9646	1879-338X		AUG	2016	37		120	126		10.1016/j.spacepol.2016.11.002	WOS:000391908500003
J	Liu, G; He, J; Luo, KT; Gao, PC; Ma, L	Liu, Gang; He, Jing; Luo, Kaitian; Gao, Peichao; Ma, Lei	Scale-free networks of the earth's surface	INTERNATIONAL JOURNAL OF MODERN PHYSICS B	0217-9792	1793-6578		AUG 20	2016	30	21			1650143	10.1142/S0217979216501435	WOS:000383784500003
J	Gong, LW; Li, N; Fan, QC; Zhao, YW; Zhang, LY; Zhang, CJ	Gong, Liwen; Li, Ni; Fan, Qicheng; Zhao, Yongwei; Zhang, Liuyi; Zhang, Chuanjie	Mapping the topography and cone morphology of the Dalinor volcanic swarm in Inner Mongolia with remote sensing and DEM data	FRONTIERS OF EARTH SCIENCE	2095-0195	2095-0209		SEP	2016	10	3	578	594		10.1007/s11707-015-0536-1	WOS:000379077000015
J	Hachani, MA; Ziadi, B; Langar, H; Sami, DA; Turki, S; Aleya, L	Hachani, Mohamed Amine; Ziadi, Boutheina; Langar, Habib; Sami, Djallouli Aslem; Turki, Souad; Aleya, Lotfi	The mapping of the Posidonia oceanica (L.) Delile barrier reef meadow in the southeastern Gulf of Tunis (Tunisia)	JOURNAL OF AFRICAN EARTH SCIENCES	1464-343X	1879-1956		SEP	2016	121		358	364		10.1016/j.jafrearsci.2016.05.030	WOS:000381167900028
J	Arroyo, I; Gine, F; Roig, C; Granollers, T	Arroyo, Ismael; Gine, Francesc; Roig, Concepcio; Granollers, Toni	Analyzing Google Earth application in a heterogeneous commodity cluster display wall	MULTIMEDIA TOOLS AND APPLICATIONS	1380-7501	1573-7721		SEP	2016	75	18	11391	11416		10.1007/s11042-015-2859-z	WOS:000382679900026
J	Hu, CM; Murch, B; Corcoran, AA; Zheng, LY; Barnes, BB; Weisberg, RH; Atwood, K; Lenes, JM	Hu, Chuanmin; Murch, Brock; Corcoran, Alina A.; Zheng, Lianyuan; Barnes, Brian B.; Weisberg, Robert H.; Atwood, Karen; Lenes, Jason M.	Developing a Smart Semantic Web With Linked Data and Models for Near-Real-Time Monitoring of Red Tides in the Eastern Gulf of Mexico	IEEE SYSTEMS JOURNAL	1932-8184	1937-9234		SEP	2016	10	3	1282	1290		10.1109/JSYST.2015.2440782	WOS:000383260300042
J	Chen, Z; Ellis, T; Velastin, SA	Chen, Zezhi; Ellis, Tim; Velastin, Sergio A.	Vision-based traffic surveys in urban environments	JOURNAL OF ELECTRONIC IMAGING	1017-9909	1560-229X		SEP	2016	25	5			51206	10.1117/1.JEI.25.5.051206	WOS:000388216900009
J	Zhao, YY; Feng, DL; Yu, L; Wang, XY; Chen, YL; Bai, YQ; Hernandez, HJ; Galleguillos, M; Estades, C; Biging, GS; Radke, JD; Gong, P	Zhao, Yuanyuan; Feng, Duole; Yu, Le; Wang, Xiaoyi; Chen, Yanlei; Bai, Yuqi; Jaime Hernandez, H.; Galleguillos, Mauricio; Estades, Cristian; Biging, Gregory S.; Radke, John D.; Gong, Peng	Detailed dynamic land cover mapping of Chile: Accuracy improvement by integrating multi-temporal data	REMOTE SENSING OF ENVIRONMENT	0034-4257	1879-0704		SEP 15	2016	183		170	185		10.1016/j.rse.2016.05.016	WOS:000382345400014
J	Benza, M; Weeks, JR; Stow, DA; Lopez-Carr, D; Clarke, KC	Benza, Magdalena; Weeks, John R.; Stow, Douglas A.; Lopez-Carr, David; Clarke, Keith C.	A pattern-based definition of urban context using remote sensing and GIS	REMOTE SENSING OF ENVIRONMENT	0034-4257	1879-0704		SEP 15	2016	183		250	264		10.1016/j.rse.2016.06.011	WOS:000382345400021	27867227
J	Asian, A; Rahman, AF; Warren, MW; Robeson, SM	Asian, Asian; Rahman, Abdullah F.; Warren, Matthew W.; Robeson, Scott M.	Mapping spatial distribution and biomass of coastal wetland vegetation in Indonesian Papua by combining active and passive remotely sensed data	REMOTE SENSING OF ENVIRONMENT	0034-4257	1879-0704		SEP 15	2016	183		65	81		10.1016/j.rse.2016.04.026	WOS:000382345400006
J	Dewald, JR; Fuller, DO; Muller, GC; Beier, JC	Dewald, Julius R.; Fuller, Douglas O.; Mueller, Gunter C.; Beier, John C.	A novel method for mapping village-scale outdoor resting microhabitats of the primary African malaria vector, Anopheles gambiae	MALARIA JOURNAL		1475-2875		SEP 22	2016	15				489	10.1186/s12936-016-1534-9	WOS:000383666200002	27659918
J	Cheng, DC; Meng, GF; Xiang, SM; Pan, CH	Cheng, Dongcai; Meng, Gaofeng; Xiang, Shiming; Pan, Chunhong	Efficient sea-land segmentation using seeds learning arid edge directed graph cut	NEUROCOMPUTING	0925-2312	1872-8286		SEP 26	2016	207		36	47		10.1016/j.neucom.2016.04.020	WOS:000382794500004
J	Kamel, M; Abu El Ella, EM	Kamel, Mostafa; Abu El Ella, El Sayed M.	Integration of Remote Sensing & GIS to Manage the Sustainable Development in the Nile Valley Desert Fringes of Assiut-Sohag Governorates, Upper Egypt	JOURNAL OF THE INDIAN SOCIETY OF REMOTE SENSING	0255-660X	0974-3006		OCT	2016	44	5	759	774		10.1007/s12524-015-0529-2	WOS:000382664900009
J	Phillips, FM; Hinz, M; Marrero, SM; Nishiizumi, K	Phillips, Fred M.; Hinz, Michelle; Marrero, Shasta M.; Nishiizumi, Kunihiko	Cosmogenic nuclide data sets from the Sierra Nevada, California, for assessment of nuclide production models: II. Sample sites and evaluation	QUATERNARY GEOCHRONOLOGY	1871-1014	1878-0350		OCT	2016	35		101	118		10.1016/j.quageo.2016.01.003	WOS:000381325500011
J	Block, S; Gonzalez, EJ; Gallardo-Cruz, JA; Fernandez, A; Solorzano, JV; Meave, JA	Block, Sebastian; Gonzalez, Edgar J.; Alberto Gallardo-Cruz, J.; Fernandez, Ana; Solorzano, Jonathan V.; Meave, Jorge A.	Using Google Earth Surface Metrics to Predict Plant Species Richness in a Complex Landscape	REMOTE SENSING	2072-4292			OCT	2016	8	10			865	10.3390/rs8100865	WOS:000387357300079
J	Hossain, MS; Bujang, JS; Zakaria, MH; Hashim, M	Hossain, Mohammad Shawkat; Bujang, Japar Sidik; Zakaria, Muta Harah; Hashim, Mazlan	Marine and human habitat mapping for the Coral Triangle Initiative region of Sabah using Landsat and Google Earth imagery	MARINE POLICY	0308-597X	1872-9460		OCT	2016	72		176	191		10.1016/j.marpol.2016.07.003	WOS:000383821500019
J	Alexandre, PM; Stewart, SI; Keuler, NS; Clayton, MK; Mockrin, MH; Bar-Massada, A; Syphard, AD; Radeloff, VC	Alexandre, Patricia M.; Stewart, Susan I.; Keuler, Nicholas S.; Clayton, Murray K.; Mockrin, Miranda H.; Bar-Massada, Avi; Syphard, Alexandra D.; Radeloff, Volker C.	Factors related to building loss due to wildfires in the conterminous United States	ECOLOGICAL APPLICATIONS	1051-0761	1939-5582		OCT	2016	26	7	2323	2338		10.1002/eap.1376	WOS:000385623900027	27755741
J	Hernandez, JH; Akilimali, P; Kayembe, P; Dikamba, N; Bertrand, J	Hernandez, Julie H.; Akilimali, Pierre; Kayembe, Patrick; Dikamba, Nelly; Bertrand, Jane	The value of spatial analysis for tracking supply for family planning: the case of Kinshasa, DRC	HEALTH POLICY AND PLANNING	0268-1080	1460-2237		OCT	2016	31	8	1058	1068		10.1093/heapol/czw036	WOS:000386066400012	27084735
J	Wei, JB; Huang, YK; Lu, K; Wang, LZ	Wei, Jingbo; Huang, Yukun; Lu, Ke; Wang, Lizhe	Nonlocal Low-Rank-Based Compressed Sensing for Remote Sensing Image Reconstruction	IEEE GEOSCIENCE AND REMOTE SENSING LETTERS	1545-598X	1558-0571		OCT	2016	13	10	1557	1561		10.1109/LGRS.2016.2595863	WOS:000386253500034
J	Orkhonselenge, A	Orkhonselenge, Alexander	Glacial Geomorphology of Mt. Munkh Saridag in the Khuvsgul Mountain Range, Northern Mongolia	GEOMORPHOLOGIE-RELIEF PROCESSUS ENVIRONNEMENT	1266-5304	1957-777X		OCT-DEC	2016	22	4	389	398		10.4000/geomorphologie.11596	WOS:000394926600004
J	Tetali, S; Edwards, P; Roberts, GVSMI	Tetali, Shailaja; Edwards, P.; Roberts, G. V. S. Murthy I.	How do children travel to school in urban India? A cross-sectional study of 5,842 children in Hyderabad	BMC PUBLIC HEALTH	1471-2458			OCT 19	2016	16				1099	10.1186/s12889-016-3750-1	WOS:000385964500006	27760532
J	Martinez-Grana, AM; Goy, JL; Zazo, C; Silva, PG	Martinez-Grana, A. M.; Goy, J. L.; Zazo, C.; Silva, P. G.	Soil map and 3D virtual tour using a database of soil-forming factors	ENVIRONMENTAL EARTH SCIENCES	1866-6280	1866-6299		NOV	2016	75	21			1402	10.1007/s12665-016-6225-x	WOS:000388600900010
J	Satge, F; Denezine, M; Pillco, R; Timouk, F; Pinel, S; Molina, J; Garnier, J; Seyler, F; Bonnet, MP	Satge, Frederic; Denezine, Matheus; Pillco, Ramiro; Timouk, Franck; Pinel, Sebastien; Molina, Jorge; Garnier, Jeremie; Seyler, Frederique; Bonnet, Marie-Paule	Absolute and relative height-pixel accuracy of SRTM-GL1 over the South American Andean Plateau	ISPRS JOURNAL OF PHOTOGRAMMETRY AND REMOTE SENSING	0924-2716	1872-8235		NOV	2016	121		157	166		10.1016/j.isprsjprs.2016.09.003	WOS:000387518300011
J	Zhao, FR; Meng, R; Huang, CQ; Zhao, MS; Zhao, FA; Gong, P; Yu, L; Zhu, ZL	Zhao, Feng R.; Meng, Ran; Huang, Chengquan; Zhao, Maosheng; Zhao, Feng A.; Gong, Peng; Yu, Le; Zhu, Zhiliang	Long-Term Post-Disturbance Forest Recovery in the Greater Yellowstone Ecosystem Analyzed Using Landsat Time Series Stack	REMOTE SENSING		2072-4292		NOV	2016	8	11			898	10.3390/rs8110898	WOS:000388798400019
J	Laforest, D	Laforest, Daniel	The satellite, the Screen, and the city: On Google Earth and the Life Narrative	INTERNATIONAL JOURNAL OF CULTURAL STUDIES	1367-8779	1460-356X		NOV	2016	19	6	659	672		10.1177/1367877915595886	WOS:000385822600005
J	Connette, KJL; Connette, G; Bernd, A; Phyo, P; Aung, KH; Tun, YL; Thein, ZM; Horning, N; Leimgruber, P; Songer, M	Connette, Katherine J. LaJeunesse; Connette, Grant; Bernd, Asja; Phyo, Paing; Aung, Kyaw Htet; Tun, Ye Lin; Thein, Zaw Min; Horning, Ned; Leimgruber, Peter; Songer, Melissa	Assessment of Mining Extent and Expansion in Myanmar Based on Freely-Available Satellite Imagery	REMOTE SENSING	2072-4292			NOV	2016	8	11			912	10.3390/rs8110912	WOS:000388798400033
J	Zhao, JL; Vanmaercke, M; Chen, LQ; Govers, G	Zhao, Jianlin; Vanmaercke, Matthias; Chen, Longqian; Govers, Gerard	Vegetation cover and topography rather than human disturbance control gully density and sediment production on the Chinese Loess Plateau	GEOMORPHOLOGY	0169-555X	1872-695X		DEC 1	2016	274		92	105		10.1016/j.geomorph.2016.09.022	WOS:000385899700007
J	Deary, ME; Bainbridge, SJ; Kerr, A; McAllister, A; Shrimpton, T	Deary, Michael E.; Bainbridge, Samantha J.; Kerr, Amy; McAllister, Adam; Shrimpton, Thomas	Practicalities of mapping PM10 and PM2.5 concentrations on city-wide scales using a portable particulate monitor	AIR QUALITY ATMOSPHERE AND HEALTH	1873-9318	1873-9326		DEC	2016	9	8	923	930		10.1007/s11869-016-0394-3	WOS:000387334000008	27867427
J	Xu, JH; Zhao, Y; Zhong, KW; Ruan, HH; Liu, XL	Xu, Jianhui; Zhao, Yi; Zhong, Kaiwen; Ruan, Huihua; Liu, Xulong	Coupling Modified Linear Spectral Mixture Analysis and Soil Conservation Service Curve Number (SCS-CN) Models to Simulate Surface Runoff: Application to the Main Urban Area of Guangzhou, China	WATER		2073-4441		DEC	2016	8	12			550	10.3390/w8120550	WOS:000392480200003
J	Pagnoni, G; Tinti, S	Pagnoni, Gianluca; Tinti, Stefano	Application and Comparison of Tsunami Vulnerability and Damage Models for the Town of Siracusa, Sicily, Italy	PURE AND APPLIED GEOPHYSICS	0033-4553	1420-9136		DEC	2016	173	12	3795	3822		10.1007/s00024-016-1261-8	WOS:000388744000008
J	Merry, K; Bettinger, P; Grebner, DL; Boston, K; Siry, J	Merry, Krista; Bettinger, Pete; Grebner, Donald L.; Boston, Kevin; Siry, Jacek	Assessment of Geographic Information System (GIS) Skills Employed by Graduates from Three Forestry Programs in the United States	FORESTS	1999-4907			DEC	2016	7	12			304	10.3390/f7120304	WOS:000393327700004
J	Pulighe, G; Lupia, F	Pulighe, Giuseppe; Lupia, Flavio	Mapping spatial patterns of urban agriculture in Rome (Italy) using Google Earth and web-mapping services	LAND USE POLICY	0264-8377	1873-5754		DEC 31	2016	59		49	58		10.1016/j.landusepol.2016.08.001	WOS:000387519600005
J	Shiomi, Y; Watanabe, K; Nakamura, H; Akahane, H	Shiomi, Yasuhiro; Watanabe, Kazuki; Nakamura, Hideki; Akahane, Hirokazu	Assessing Safety of Signalized Intersections Influence of Geometric Attributes and Regionality on Traffic Accident Risk	TRANSPORTATION RESEARCH RECORD	0361-1981	2169-4052		JAN	2017		2659	71	79		10.3141/2659-08	WOS:000462095500008
J	Han, XB; Zhong, YF; Zhao, B; Zhang, LP	Han, Xiaobing; Zhong, Yanfei; Zhao, Bei; Zhang, Liangpei	Scene classification based on a hierarchical convolutional sparse auto-encoder for high spatial resolution imagery	INTERNATIONAL JOURNAL OF REMOTE SENSING	0143-1161	1366-5901			2017	38	2	514	536		10.1080/01431161.2016.1266059	WOS:000390607700009
J	Chanakya, HN; Shwetmala,; Ramachandra, TV	Chanakya, H. N.; Shwetmala; Ramachandra, T. V.	Nature and extent of unauthorized waste dump sites in and around Bangalore city	JOURNAL OF MATERIAL CYCLES AND WASTE MANAGEMENT	1438-4957	1611-8227		JAN	2017	19	1	342	350		10.1007/s10163-015-0423-6	WOS:000392385300035
J	Matthews, Y; Scarpa, R; Marsh, D	Matthews, Yvonne; Scarpa, Riccardo; Marsh, Dan	Using virtual environments to improve the realism of choice experiments: A case study about coastal erosion management	JOURNAL OF ENVIRONMENTAL ECONOMICS AND MANAGEMENT	0095-0696	1096-0449		JAN	2017	81		193	208		10.1016/j.jeem.2016.08.001	WOS:000393012400011
J	Liu, CC; Nakamura, R; Ko, MH; Matsuo, T; Kato, S; Yin, HY; Huang, CS	Liu, Cheng-Chien; Nakamura, Ryosuke; Ko, Ming-Hsun; Matsuo, Tomoya; Kato, Soushi; Yin, Hsiao-Yuan; Huang, Chung-Shiou	Near Real-Time Browsable Landsat-8 Imagery	REMOTE SENSING	2072-4292			JAN	2017	9	1			79	10.3390/rs9010079	WOS:000395492600078
J	Kanda, M; Badjana, HM; Folega, F; Akpavi, S; Wala, K; Imbernon, J; Akpagana, K	Kanda, Madjouma; Badjana, Heou Maleki; Folega, Fousseni; Akpavi, Semihinva; Wala, Kperkouma; Imbernon, Jacques; Akpagana, Koffi	Peri-urban market gardening centrifugal dynamics in Lome (Togo) in response to land pressure	CAHIERS AGRICULTURES	1777-5949			JAN-FEB	2017	26	1			15001	10.1051/cagri/2016054	WOS:000395680500003
J	Chen, XY; Lin, Y; Zhang, M; Yu, L; Li, HC; Bai, YQ	Chen Xiao-yu; Lin Ya; Zhang Min; Yu Le; Li Hao-chuan; Bai Yu-qi	Assessment of the cropland classifications in four global land cover datasets: A case study of Shaanxi Province, China	JOURNAL OF INTEGRATIVE AGRICULTURE	2095-3119				2017	16	2	298	311		10.1016/S2095-3119(16)61442-9	WOS:000394482800006
J	Li, ZP; Long, YQ; Tang, PQ; Tan, JY; Li, ZG; Wu, WB; Hu, YN; Yang, P	Li Zhi-peng; Long Yu-qiao; Tang Peng-qin; Tan Jie-yang; Li Zheng-guo; Wu Wen-bin; Hu Ya-nan; Yang Peng	Spatio-temporal changes in rice area at the northern limits of the rice cropping system in China from 1984 to 2013	JOURNAL OF INTEGRATIVE AGRICULTURE	2095-3119				2017	16	2	360	367		10.1016/S2095-3119(16)61365-5	WOS:000394482800011
J	Paul, A; Chowdary, VM; Srivastava, YK; Dutta, D; Sharma, JR	Paul, Arati; Chowdary, V. M.; Srivastava, Y. K.; Dutta, D.; Sharma, J. R.	Change detection of linear features in temporally spaced remotely sensed images using edge-based grid analysis	GEOCARTO INTERNATIONAL	1010-6049	1752-0762			2017	32	6	640	654		10.1080/10106049.2016.1167966	WOS:000399646500004
J	Cheng, YQ; Yu, L; Zhao, YY; Xu, YD; Hackman, K; Cracknell, AP; Gong, P	Cheng, Yuqi; Yu, Le; Zhao, Yuanyuan; Xu, Yidi; Hackman, Kwame; Cracknell, Arthur P.; Gong, Peng	Towards a global oil palm sample database: design and implications	INTERNATIONAL JOURNAL OF REMOTE SENSING	0143-1161	1366-5901			2017	38	14	4022	4032		10.1080/01431161.2017.1312622	WOS:000401460800003
J	Wang, D; Cui, XR; Xie, FY; Jiang, ZG; Shi, ZW	Wang, Dan; Cui, Xinrui; Xie, Fengying; Jiang, Zhiguo; Shi, Zhenwei	Multi-feature sea-land segmentation based on pixel-wise learning for optical remote-sensing imagery	INTERNATIONAL JOURNAL OF REMOTE SENSING	0143-1161	1366-5901			2017	38	15	4327	4347		10.1080/01431161.2017.1317938	WOS:000401757700004
J	Mazeika, D; Summerton, D	Mazeika, David; Summerton, David	The impact of geocoding method on the positional accuracy of residential burglaries reported to police	POLICING-AN INTERNATIONAL JOURNAL OF POLICE STRATEGIES & MANAGEMENT	1363-951X	1758-695X			2017	40	2	459	470		10.1108/PIJPSM-03-2016-0048	WOS:000402934200020
J	Moriano Tello, DE; Paredes Ruiz, PA; Cordoba Guerrero, G; Delgado Granados, H	Moriano Tello, Diana Elizabeth; Paredes Ruiz, Paola Andrea; Cordoba Guerrero, Gustavo; Delgado Granados, Hugo	Vulnerability assessment of buildings to lahar formation: Study case of the Santiago Xalitzintla village on the NE flank of the Popocatepetl volcano (Mexico)	BOLETIN DE LA SOCIEDAD GEOLOGICA MEXICANA	1405-3322				2017	69	1	223	241			WOS:000405602700001
J	Aguilar, MA; Nemmaoui, A; Aguilar, FJ; Novelli, A; Lorca, AG	Aguilar, Manuel A.; Nemmaoui, Abderrahim; Aguilar, Fernando J.; Novelli, Antonio; Garcia Lorca, Andres	Improving georeferencing accuracy of Very High Resolution satellite imagery using freely available ancillary data at global coverage	INTERNATIONAL JOURNAL OF DIGITAL EARTH	1753-8947	1753-8955			2017	10	10	1055	1069		10.1080/17538947.2017.1280549	WOS:000407512100005
J	Chang, CLH; Hsiao, WYL	Chang, Christina Ling-Hsing; Hsiao, Weng-Yi-Lang	On-line Agricultural Products Navigation System on the Google Earth	AGRICULTURAL ECONOMICS-ZEMEDELSKA EKONOMIKA	0139-570X	1805-9295			2017	63	9	400	410		10.17221/26/2016-AGRICECON	WOS:000411502100002
J	Zaidi, SM; Akbari, A; Abu Samah, A; Kong, NS; Gisen, JIA	Zaidi, Syeda Maria; Akbari, Abolghasem; Abu Samah, Azizan; Kong, Ngien Su; Gisen, Jacqueline Isabella Aanak	Landsat-5 Time Series Analysis for Land Use/Land Cover Change Detection Using NDVI and Semi-Supervised Classification Techniques	POLISH JOURNAL OF ENVIRONMENTAL STUDIES	1230-1485	2083-5906			2017	26	6	2833	2840		10.15244/pjoes/68878	WOS:000414471200043
J	Canal, MR; Ferreira, ERD; Estofolete, CF; Dias, AM; Tukasan, C; Bertoque, AC; Muniz, VD; Nogueira, ML; da Silva, NS	Canal, Mayara Romero; da Silva Ferreira, Elis Regina; Estofolete, Cassia Fernanda; Dias, Andreia Martiniano; Tukasan, Caroline; Bertoque, Ana Carolina; Muniz, Vitor Dantas; Nogueira, Mauricio Lacerda; da Silva, Natal Santos	Spatiotemporal-based clusters as a method for dengue surveillance	REVISTA PANAMERICANA DE SALUD PUBLICA-PAN AMERICAN JOURNAL OF PUBLIC HEALTH	1020-4989				2017	41				e162	10.26633/RPSP.2017.162	WOS:000441138600045	31384275
J	Deroin, JP; Buslov, MM	Deroin, Jean-Paul; Buslov, Mikhail M.	Geomorphic study of seismically active areas using remote sensing data. Case of the Gorny Altai (Siberia) affected by the 2003 Altai earthquake	BULLETIN DE LA SOCIETE GEOLOGIQUE DE FRANCE	0037-9409	1777-5817			2017	188	1-2			11	10.1051/bsgf/2017012	WOS:000406259700012
J	Liao, H; Dong, WH; Peng, C; Liu, HP	Liao, Hua; Dong, Weihua; Peng, Chen; Liu, Huiping	Exploring differences of visual attention in pedestrian navigation when using 2D maps and 3D geo-browsers	CARTOGRAPHY AND GEOGRAPHIC INFORMATION SCIENCE	1523-0406	1545-0465			2017	44	6	474	490		10.1080/15230406.2016.1174886	WOS:000425064100001
J	MacLachlan, A; Roberts, G; Biggs, E; Boruff, B	MacLachlan, Andrew; Roberts, Gareth; Biggs, Eloise; Boruff, Bryan	Subpixel land-cover classification for improved urban area estimates using Landsat	INTERNATIONAL JOURNAL OF REMOTE SENSING	0143-1161	1366-5901			2017	38	20	5763	5792		10.1080/01431161.2017.1346403	WOS:000405206600016
J	Mekuriaw, A; Heinimann, A; Zeleke, G; Hurni, H; Hurni, K	Mekuriaw, Asnake; Heinimann, Andreas; Zeleke, Gete; Hurni, Hans; Hurni, Kaspar	An automated method for mapping physical soil and water conservation structures on cultivated land using GIS and remote sensing techniques	JOURNAL OF GEOGRAPHICAL SCIENCES	1009-637X	1861-9568		JAN	2017	27	1	79	94		10.1007/s11442-017-1365-9	WOS:000388979600005
J	Jiang, B; Deal, B; Pan, HZ; Larsen, L; Hsieh, CH; Chang, CY; Sullivan, WC	Jiang, Bin; Deal, Brian; Pan, HaoZhi; Larsen, Linda; Hsieh, Chung-Heng; Chang, Chun-Yen; Sullivan, William C.	Remotely-sensed imagery vs. eye-level photography: Evaluating associations among measurements of tree cover density	LANDSCAPE AND URBAN PLANNING	0169-2046	1872-6062		JAN	2017	157		270	281		10.1016/j.landurbplan.2016.07.010	WOS:000390183300026
J	Parente, CC; Bezerra, FSM; Parente, PI; Neto, RVD; Xavier, SCC; Ramos, AN; Carvalho-Costa, FA; Lima, MM	Parente, Cynara Carvalho; Bezerra, Fernando S. M.; Parente, Plutarco I.; Dias-Neto, Raimundo V.; Xavier, Samanta C. C.; Ramos, Alberto N., Jr.; Carvalho-Costa, Filipe A.; Lima, Marli M.	Community-Based Entomological Surveillance Reveals Urban Foci of Chagas Disease Vectors in Sobral, State of Ceara, Northeastern Brazil	PLOS ONE	1932-6203			JAN 19	2017	12	1			e0170278	10.1371/journal.pone.0170278	WOS:000392381100049	28103294
J	Cheng, DC; Meng, GF; Cheng, GL; Pan, CH	Cheng, Dongcai; Meng, Gaofeng; Cheng, Guangliang; Pan, Chunhong	SeNet: Structured Edge Network for Sea-Land Segmentation	IEEE GEOSCIENCE AND REMOTE SENSING LETTERS	1545-598X	1558-0571		FEB	2017	14	2	247	251		10.1109/LGRS.2016.2637439	WOS:000395429800023
J	Xiang, X; Liu, Y	Xiang, X.; Liu, Y.	Understanding change' through spatial thinking using Google Earth in secondary geography	JOURNAL OF COMPUTER ASSISTED LEARNING	0266-4909	1365-2729		FEB	2017	33	1	65	78		10.1111/jcal.12166	WOS:000394639100005
J	Knauer, K; Gessner, U; Fensholt, R; Forkuor, G; Kuenzer, C	Knauer, Kim; Gessner, Ursula; Fensholt, Rasmus; Forkuor, Gerald; Kuenzer, Claudia	Monitoring Agricultural Expansion in Burkina Faso over 14 Years with 30 m Resolution Time Series: The Role of Population Growth and Implications for the Environment	REMOTE SENSING		2072-4292		FEB	2017	9	2			132	10.3390/rs9020132	WOS:000397013700034
J	Mercier, OR; Rata, A	Mercier, O. Ripeka; Rata, Arama	Drawing the line with Google Earth: the place of digital mapping outside of geography	JOURNAL OF GEOGRAPHY IN HIGHER EDUCATION	0309-8265	1466-1845		FEB	2017	41	1	75	93		10.1080/03098265.2016.1260097	WOS:000392982100005
J	Mekonnen, M; Keesstra, SD; Baartman, JEM; Stroosnijder, L; Maroulis, J	Mekonnen, Mulatie; Keesstra, Saskia D.; Baartman, Jantiene E. M.; Stroosnijder, Leo; Maroulis, Jerry	REDUCING SEDIMENT CONNECTIVITY THROUGH MAN-MADE AND NATURAL SEDIMENT SINKS IN THE MINIZR CATCHMENT, NORTHWEST ETHIOPIA	LAND DEGRADATION & DEVELOPMENT	1085-3278	1099-145X		FEB	2017	28	2	708	717		10.1002/ldr.2629	WOS:000394955500030
J	Gul, M; Danladi, IB; Kore, BM	Gul, Murat; Danladi, Iliya Bauchi; Kore, Basiru Mohammed	Coastal types of graben: the Gulf of Gokova, Mugla-SW Turkey	JOURNAL OF COASTAL CONSERVATION	1400-0350	1874-7841		FEB	2017	21	1	127	138		10.1007/s11852-016-0481-5	WOS:000399030200011
J	Holden, ST; Quiggin, J	Holden, Stein T.; Quiggin, John	Bounded awareness and anomalies in intertemporal choice: Zooming in Google Earth as both metaphor and model	JOURNAL OF RISK AND UNCERTAINTY	0895-5646	1573-0476		FEB	2017	54	1	15	35		10.1007/s11166-017-9254-2	WOS:000403691200002
J	Furumo, PR; Aide, TM	Richard Furumo, Paul; Mitchell Aide, T.	Characterizing commercial oil palm expansion in Latin America: land use change and trade	ENVIRONMENTAL RESEARCH LETTERS	1748-9326			FEB	2017	12	2			24008	10.1088/1748-9326/aa5892	WOS:000410374800001
J	van Oort, AJ; Saito, K; Dieng, I; Grassini, P; Cassman, KG; van Ittersum, MK	van Oort, A. J.; Saito, K.; Dieng, I.; Grassini, P.; Cassman, K. G.; van Ittersum, M. K.	Can yield gap analysis be used to inform R & D prioritisation?	GLOBAL FOOD SECURITY-AGRICULTURE POLICY ECONOMICS AND ENVIRONMENT	2211-9124			MAR	2017	12		109	118		10.1016/j.gfs.2016.09.005	WOS:000408019200015
J	Wang, JE; Xiao, XM; Qin, YW; Dong, JW; Geissler, G; Zhang, GL; Cejda, N; Alikhani, B; Doughty, RB	Wang, Jie; Xiao, Xiangming; Qin, Yuanwei; Dong, Jinwei; Geissler, George; Zhang, Geli; Cejda, Nicholas; Alikhani, Brian; Doughty, Russell B.	Mapping the dynamics of eastern redcedar encroachment into grasslands during 1984-2010 through PALSAR and time series Landsat images	REMOTE SENSING OF ENVIRONMENT	0034-4257	1879-0704		MAR 1	2017	190		233	246		10.1016/j.rse.2016.12.025	WOS:000394399300019
J	Jain, D; Tiwari, G	Jain, Deepty; Tiwari, Geetam	Population disaggregation to capture short trips - Vishakhapatnam, India	COMPUTERS ENVIRONMENT AND URBAN SYSTEMS	0198-9715	1873-7587		MAR	2017	62		7	18		10.1016/j.compenvurbsys.2016.10.003	WOS:000394069700002
J	Xian, B; Zhao, B; Zhang, Y; Zhang, X	Xian, Bin; Zhao, Bo; Zhang, Yao; Zhang, Xu	A low-cost hardware-in-the-loop-simulation testbed of quadrotor UAV and implementation of nonlinear control schemes	ROBOTICA	0263-5747	1469-8668		MAR	2017	35	3	588	612		10.1017/S0263574715000727	WOS:000395982000007
J	Qi, WH; Su, GW; Sun, L; Yang, F; Wu, Y	Qi, Wenhua; Su, Guiwu; Sun, Lei; Yang, Fan; Wu, Yang	Internet plus approach to mapping exposure and seismic vulnerability of buildings in a context of rapid socioeconomic growth: a case study in Tangshan, China	NATURAL HAZARDS	0921-030X	1573-0840		MAR	2017	86		107	139		10.1007/s11069-016-2581-9	WOS:000395078700006
J	Oakley, BA; Manzi, MA; Sumeersarnauth, BJ; Boyle, S	Oakley, Bryan A.; Manzi, Mike A.; Sumeersarnauth, Brandan J.; Boyle, Samantha	The Block Island Bluff Image Project: Using Google Earth (TM), Spreadsheet Mapper, and Google Drive (TM) to Build a Database of Spatially Located Field Images of Coastal Bluffs	JOURNAL OF COASTAL RESEARCH	0749-0208	1551-5036		MAR	2017	33	2	463	467		10.2112/JCOASTRES-D-15-00216.1	WOS:000397355700020
J	Quiroga, DRA; Gil, V; Coronato, A	Quiroga, D. R. A.; Gil, V.; Coronato, A.	Quantitative geomorphology applied to fluvial dynamic in Aviles and Moneta basins, Tierra Del Fuego, Southern Argentina	ENVIRONMENTAL EARTH SCIENCES	1866-6280	1866-6299		MAR	2017	76	5			188	10.1007/s12665-017-6494-z	WOS:000396208400001
J	Liu, DM; Kenjeres, S	Liu, Daoming; Kenjeres, Sasa	Google-Earth Based Visualizations for Environmental Flows and Pollutant Dispersion in Urban Areas	INTERNATIONAL JOURNAL OF ENVIRONMENTAL RESEARCH AND PUBLIC HEALTH	1660-4601			MAR	2017	14	3			247	10.3390/ijerph14030247	WOS:000398524100030	28257078
J	Mahmood, K; Batool, SA; Chaudhary, MN; Ul-Haq, Z	Mahmood, Khalid; Batool, Syeda Adila; Chaudhary, Muhammad Nawaz; Ul-Haq, Zia	Ranking criteria for assessment of municipal solid waste dumping sites	ARCHIVES OF ENVIRONMENTAL PROTECTION	2083-4772	2083-4810		MAR	2017	43	1	95	105		10.1515/aep-2017-0009	WOS:000399253500011
J	Vance, JA; Smith, WH; Smith, GL	Vance, James A.; Smith, Walter H.; Smith, Gabrielle L.	Public geospatial datasets as an approach to maximizing efficiency in the collection of site covariates in wildlife- vehicle collision studies	HUMAN-WILDLIFE INTERACTIONS	1934-4392	1936-8046		SPR	2017	11	1	78	85			WOS:000403125200009
J	Rost, S; Wright, DK; Woodson, MK	Rost, Stephanie; Wright, David K.; Woodson, M. Kyle	Application of remote sensing technologies in detecting prehistoric canals of the Hohokam Period (AD 450-1450) in the Middle Gila River Valley, Arizona	ARCHAEOLOGICAL AND ANTHROPOLOGICAL SCIENCES	1866-9557	1866-9565		APR	2017	9	3	295	315		10.1007/s12520-015-0244-5	WOS:000399027500001
J	Rejani, R; Rao, KV; Rao, CHS; Osman, M; Reddy, KS; George, B; Kranthi, GSP; Chary, GR; Swamy, MV; Rao, PJ	Rejani, R.; Rao, K. V.; Rao, C. H. Srinivasa; Osman, M.; Reddy, K. Sammi; George, Biju; Kranthi, G. S. Pratyusha; Chary, G. R.; Swamy, M. V.; Rao, P. J.	IDENTIFICATION OF POTENTIAL RAINWATER-HARVESTING SITES FOR THE SUSTAINABLE MANAGEMENT OF A SEMI-ARID WATERSHED	IRRIGATION AND DRAINAGE	1531-0353	1531-0361		APR	2017	66	2	227	237		10.1002/ird.2101	WOS:000403013100008
J	Wang, PS; Huang, CQ; de Colstoun, ECB	Wang, Panshi; Huang, Chengquan; de Colstoun, Eric C. Brown	Mapping 2000-2010 Impervious Surface Change in India Using Global Land Survey Landsat Data	REMOTE SENSING		2072-4292		APR	2017	9	4			366	10.3390/rs9040366	WOS:000402571700065
J	Zamora, A	Zamora, Antonio	A model for the geomorphology of the Carolina Bays	GEOMORPHOLOGY	0169-555X	1872-695X		APR 1	2017	282		209	216		10.1016/j.geomorph.2017.01.019	WOS:000395959600016
J	Ye, QH; Zong, JBA; Tian, LD; Cogley, JG; Song, CQ; Guo, WQ	Ye, Qinghua; Zong, Jibiao; Tian, Lide; Cogley, J. Graham; Song, Chunqiao; Guo, Wanqin	Glacier changes on the Tibetan Plateau derived from Landsat imagery: mid-1970s-2000-13	JOURNAL OF GLACIOLOGY	0022-1430	1727-5652		APR	2017	63	238	273	287		10.1017/jog.2016.137	WOS:000396124800006
J	Li, HX; Xiao, PF; Feng, XZ; Yang, YK; Wang, LX; Zhang, WB; Wang, XH; Feng, WD; Chang, X	Li, Haixing; Xiao, Pengfeng; Feng, Xuezhi; Yang, Yongke; Wang, Lingxiao; Zhang, Wenbo; Wang, Xiaohui; Feng, Weiding; Chang, Xiao	Using Land Long-Term Data Records to Map Land Cover Changes in China Over 1981-2010	IEEE JOURNAL OF SELECTED TOPICS IN APPLIED EARTH OBSERVATIONS AND REMOTE SENSING	1939-1404	2151-1535		APR	2017	10	4	1372	1389		10.1109/JSTARS.2016.2645203	WOS:000398948400012
J	Gamble, J; Snizek, B; Nielsen, TS	Gamble, Julie; Snizek, Bernhard; Nielsen, Thomas Sick	From people to cycling indicators: Documenting and understanding the urban context of cyclists' experiences in Quito, Ecuador	JOURNAL OF TRANSPORT GEOGRAPHY	0966-6923	1873-1236		APR	2017	60		167	177		10.1016/j.jtrangeo.2017.03.004	WOS:000403117300016
J	Simwanda, M; Murayama, Y	Simwanda, Matamyo; Murayama, Yuji	Integrating Geospatial Techniques for Urban Land Use Classification in the Developing Sub-Saharan African City of Lusaka, Zambia	ISPRS INTERNATIONAL JOURNAL OF GEO-INFORMATION		2220-9964		APR	2017	6	4			102	10.3390/ijgi6040102	WOS:000404525000011
J	Wang, XW; Liu, L; Zhao, L; Wu, TH; Li, ZQ; Liu, GX	Wang, Xiaowen; Liu, Lin; Zhao, Lin; Wu, Tonghua; Li, Zhongqin; Liu, Guoxiang	Mapping and inventorying active rock glaciers in the northern Tien Shan of China using satellite SAR interferometry	CRYOSPHERE	1994-0416	1994-0424		APR 20	2017	11	2	997	1014		10.5194/tc-11-997-2017	WOS:000399810400002
J	Wang, YS; Zou, YJ; Henrickson, K; Wang, YH; Tang, JJ; Park, BJ	Wang, Yinsong; Zou, Yajie; Henrickson, Kristian; Wang, Yinhai; Tang, Jinjun; Park, Byung-Jung	Google Earth elevation data extraction and accuracy assessment for transportation applications	PLOS ONE	1932-6203			APR 26	2017	12	4			e0175756	10.1371/journal.pone.0175756	WOS:000400309200026	28445480
J	Ye, LP; Fang, LC; Tan, WF; Wu, CG; Wu, H	Ye, Luping; Fang, Linchuan; Tan, Wenfeng; Wu, Changguang; Wu, Hao	Modeling spatiotemporal distribution of PM10 using HJ-1 CCD data in Luoyang, China	ATMOSPHERIC POLLUTION RESEARCH	1309-1042			MAY	2017	8	3	555	563		10.1016/j.apr.2016.12.012	WOS:000408018900017
J	Jarvis, CH; Kraftl, P; Dickie, J	Jarvis, Claire H.; Kraftl, P.; Dickie, J.	(Re)Connecting spatial literacy with children's geographies: GPS, Google Earth and children's everyday lives	GEOFORUM	0016-7185	1872-9398		MAY	2017	81		22	31		10.1016/j.geoforum.2017.02.006	WOS:000401387100003
J	Aires, F; Miolane, L; Prigent, C; Pham, B; Fluet-Chouinard, E; Lehner, B; Papa, F	Aires, Filipe; Miolane, Leo; Prigent, Catherine; Pham, Binh; Fluet-Chouinard, Etienne; Lehner, Bernhard; Papa, Fabrice	A Global Dynamic Long-Term Inundation Extent Dataset at High Spatial Resolution Derived through Downscaling of Satellite Observations	JOURNAL OF HYDROMETEOROLOGY	1525-755X	1525-7541		MAY	2017	18	5	1305	1325		10.1175/JHM-D-16-0155.1	WOS:000405926000006
J	Zhao, W; Li, AN; Nan, X; Zhang, ZJ; Lei, GB	Zhao, Wei; Li, Ainong; Nan, Xi; Zhang, Zhengjian; Lei, Guangbin	Postearthquake Landslides Mapping From Landsat-8 Data for the 2015 Nepal Earthquake Using a Pixel-Based Change Detection Method	IEEE JOURNAL OF SELECTED TOPICS IN APPLIED EARTH OBSERVATIONS AND REMOTE SENSING	1939-1404	2151-1535		MAY	2017	10	5	1758	1768		10.1109/JSTARS.2017.2661802	WOS:000399682500008
J	Yushu, D; Lee, S; Matous, K	Yushu, Dewen; Lee, Sangmin; Matous, Karel	Sharp volumetric billboard based characterization and modeling of complex 3D Ni/A1 high energy ball milled composites	MECHANICS OF MATERIALS	0167-6636	1872-7743		MAY	2017	108		93	106		10.1016/j.mechmat.2017.02.008	WOS:000399859100009
J	Huang, SY; Yu, JP; Wang, YK; Liu, JW	Huang, Shih-Yu; Yu, Jen-Perng; Wang, Yuan-Kai; Liu, Jia-Wei	Designing an exergaming system for exercise bikes using kinect sensors and Google Earth	MULTIMEDIA TOOLS AND APPLICATIONS	1380-7501	1573-7721		MAY	2017	76	10	12281	12314		10.1007/s11042-016-3641-6	WOS:000401935200006
J	Arribas-Bel, D; Patino, JE; Duque, JC	Arribas-Bel, Daniel; Patino, Jorge E.; Duque, Juan C.	Remote sensing-based measurement of Living Environment Deprivation: Improving classical approaches with machine learning	PLOS ONE	1932-6203			MAY 2	2017	12	5			e0176684	10.1371/journal.pone.0176684	WOS:000400646300043	28464010
J	Bastin, JF; Berrahmouni, N; Grainger, A; Maniatis, D; Mollicone, D; Moore, R; Patriarca, C; Picard, N; Sparrow, B; Abraham, EM; Aloui, K; Atesoglu, A; Attorre, F; Bassullu, C; Bey, A; Garzuglia, M; Garcia-Montero, LG; Groot, N; Guerin, G; Laestadius, L; Lowe, AJ; Mamane, B; Marchi, G; Patterson, P; Rezende, M; Ricci, S; Salcedo, I; Diaz, ASP; Stolle, F; Surappaeva, V; Castro, R	Bastin, Jean-Francois; Berrahmouni, Nora; Grainger, Alan; Maniatis, Danae; Mollicone, Danilo; Moore, Rebecca; Patriarca, Chiara; Picard, Nicolas; Sparrow, Ben; Abraham, Elena Maria; Aloui, Kamel; Atesoglu, Ayhan; Attorre, Fabio; Bassullu, Caglar; Bey, Adia; Garzuglia, Monica; Garcia-Montero, Luis G.; Groot, Nikee; Guerin, Greg; Laestadius, Lars; Lowe, Andrew J.; Mamane, Bako; Marchi, Giulio; Patt…	The extent of forest in dryland biomes	SCIENCE	0036-8075	1095-9203		MAY 12	2017	356	6338	635	+		10.1126/science.aam6527	WOS:000400975200054	28495750
J	De Paor, DG; Dordevic, MM; Karabinos, P; Burgin, S; Coba, F; Whitmeyer, SJ	De Paor, Declan G.; Dordevic, Mladen M.; Karabinos, Paul; Burgin, Stephen; Coba, Filis; Whitmeyer, Steven J.	Exploring the reasons for the seasons using Google Earth, 3D models, and plots	INTERNATIONAL JOURNAL OF DIGITAL EARTH	1753-8947	1753-8955		JUN	2017	10	6	582	603		10.1080/17538947.2016.1239770	WOS:000400512500002
J	Neely, AB; Bookhagen, B; Burbank, DW	Neely, A. B.; Bookhagen, B.; Burbank, D. W.	An automated knickzone selection algorithm (KZ-Picker) to analyze transient landscapes: Calibration and validation	JOURNAL OF GEOPHYSICAL RESEARCH-EARTH SURFACE	2169-9003	2169-9011		JUN	2017	122	6	1236	1261		10.1002/2017JF004250	WOS:000405203900002
J	Andrew, ME; Shephard, JM	Andrew, Margaret E.; Shephard, Jill M.	Semi-automated detection of eagle nests: an application of very high-resolution image data and advanced image analyses to wildlife surveys	REMOTE SENSING IN ECOLOGY AND CONSERVATION		2056-3485		JUN	2017	3	2	66	80		10.1002/rse2.38	WOS:000436010900003
J	Scharsich, V; Mtata, K; Hauhs, M; Lange, H; Bogner, C	Scharsich, Valeska; Mtata, Kupakwashe; Hauhs, Michael; Lange, Holger; Bogner, Christina	Analysing land cover and land use change in the Matobo National Park and surroundings in Zimbabwe	REMOTE SENSING OF ENVIRONMENT	0034-4257	1879-0704		JUN 1	2017	194		278	286		10.1016/j.rse.2017.03.037	WOS:000401888600021
J	Shi, ZW; Zou, ZX	Shi, Zhenwei; Zou, Zhengxia	Can a Machine Generate Humanlike Language Descriptions for a Remote Sensing Image?	IEEE TRANSACTIONS ON GEOSCIENCE AND REMOTE SENSING	0196-2892	1558-0644		JUN	2017	55	6	3623	3634		10.1109/TGRS.2017.2677464	WOS:000402063500042
J	Sunder, S; Ramsankaran, R; Ramakrishnan, B	Sunder, Swathy; Ramsankaran, Raaj; Ramakrishnan, Balaji	Inter-comparison of remote sensing sensing-based shoreline mapping techniques at different coastal stretches of India	ENVIRONMENTAL MONITORING AND ASSESSMENT	0167-6369	1573-2959		JUN	2017	189	6			290	10.1007/s10661-017-5996-1	WOS:000403083300047	28536914
J	Clow, R; Rutter, A; Zeeb, BA	Clow, Rachel; Rutter, Allison; Zeeb, Barbara A.	Residual dichlorodiphenyltrichloroethane distribution in the soils and sediments of Point Pelee National Park: Implications and tools for remediation	CANADIAN JOURNAL OF SOIL SCIENCE	0008-4271	1918-1841		JUN	2017	97	2	178	187		10.1139/cjss-2016-0048	WOS:000403353500011
J	Sharma, A; Wang, J; Lennartson, EM	Sharma, Ambrish; Wang, Jun; Lennartson, Elizabeth M.	Intercomparison of MODIS and VIIRS Fire Products in Khanty-Mansiysk Russia: Implications for Characterizing Gas Flaring from Space	ATMOSPHERE	2073-4433			JUN	2017	8	6			95	10.3390/atmos8060095	WOS:000404381900003
J	Liu, MY; Li, HY; Li, L; Man, WD; Jia, MM; Wang, ZM; Lu, CY	Liu, Mingyue; Li, Huiying; Li, Lin; Man, Weidong; Jia, Mingming; Wang, Zongming; Lu, Chunyan	Monitoring the Invasion of Spartina alterniflora Using Multi-source High-resolution Imagery in the Zhangjiang Estuary, China	REMOTE SENSING	2072-4292			JUN	2017	9	6			539	10.3390/rs9060539	WOS:000404623900030
J	Wang, YJ; Lu, DS	Wang, Yajie; Lu, Dengsheng	Mapping Torreya grandis Spatial Distribution Using High Spatial Resolution Satellite Imagery with the Expert Rules-Based Approach	REMOTE SENSING	2072-4292			JUN	2017	9	6			564	10.3390/rs9060564	WOS:000404623900055
J	Yang, K; Pan, AN; Yang, Y; Zhang, S; Ong, SH; Tang, HL	Yang, Kun; Pan, Anning; Yang, Yang; Zhang, Su; Ong, Sim Heng; Tang, Haolin	Remote Sensing Image Registration Using Multiple Image Features	REMOTE SENSING		2072-4292		JUN	2017	9	6			581	10.3390/rs9060581	WOS:000404623900072
J	Manakos, I; Karakizi, C; Gkinis, I; Karantzalos, K	Manakos, Ioannis; Karakizi, Christina; Gkinis, Ioannis; Karantzalos, Konstantinos	Validation and Inter-Comparison of Spaceborne Derived Global and Continental Land Cover Products for the Mediterranean Region: The Case of Thessaly	LAND		2073-445X		JUN	2017	6	2			34	10.3390/land6020034	WOS:000404633800013
J	Bouiflane, M; Manar, A; Medina, F; Youbi, N; Rimi, A	Bouiflane, Mustapha; Manar, Ahmed; Medina, Fida; Youbi, Nasrrddine; Rimi, Abdelkrim	Mapping and characterization from aeromagnetic data of the Foum Zguid dolerite Dyke (Anti-Atlas, Morocco) a member of the Central Atlantic Magmatic Province (CAMP)	TECTONOPHYSICS	0040-1951	1879-3266		JUN 20	2017	708		15	27		10.1016/j.tecto.2017.04.023	WOS:000403518900002
J	Li, XD; Ling, F; Foody, GM; Ge, Y; Zhang, YH; Du, Y	Li, Xiaodong; Ling, Feng; Foody, Giles M.; Ge, Yong; Zhang, Yihang; Du, Yun	Generating a series of fine spatial and temporal resolution land cover maps by fusing coarse spatial resolution remotely sensed images and fine spatial resolution land cover maps	REMOTE SENSING OF ENVIRONMENT	0034-4257	1879-0704		JUL	2017	196		293	311		10.1016/j.rse.2017.05.011	WOS:000403443700022
J	Vogelmann, JE; Van Khoa, P; Lan, DX; Shermeyer, J; Shi, H; Wimberly, MC; Duong, HT; Van Huong, L	Vogelmann, James E.; Phung Van Khoa; Do Xuan Lan; Shermeyer, Jacob; Shi, Hua; Wimberly, Michael C.; Hoang Tat Duong; Le Van Huong	Assessment of Forest Degradation in Vietnam Using Landsat Time Series Data	FORESTS	1999-4907			JUL	2017	8	7			238	10.3390/f8070238	WOS:000406694400018
J	Murillo-Garcia, FG; Rossi, M; Ardizzone, F; Fiorucci, F; Alcantara-Ayala, I	Murillo-Garcia, Franny G.; Rossi, Mauro; Ardizzone, Francesca; Fiorucci, Federica; Alcantara-Ayala, Irasema	Hazard and population vulnerability analysis: a step towards landslide risk assessment	JOURNAL OF MOUNTAIN SCIENCE	1672-6316	1993-0321		JUL	2017	14	7	1241	1261		10.1007/s11629-016-4179-9	WOS:000404674600001
J	Singh, P; Kikon, N; Verma, P	Singh, Prafull; Kikon, Noyingbeni; Verma, Pradipika	Impact of land use change and urbanization on urban heat island in Lucknow city, Central India. A remote sensing based estimate	SUSTAINABLE CITIES AND SOCIETY	2210-6707	2210-6715		JUL	2017	32		100	114		10.1016/j.scs.2017.02.018	WOS:000406308800009
J	Fritz, C; Dornhofer, K; Schneider, T; Geist, J; Oppelt, N	Fritz, Christine; Doernhoefer, Katja; Schneider, Thomas; Geist, Juergen; Oppelt, Natascha	Mapping Submerged Aquatic Vegetation Using RapidEye Satellite Data: The Example of Lake Kummerow (Germany)	WATER	2073-4441			JUL	2017	9	7			510	10.3390/w9070510	WOS:000406681700061
J	Liu, DM; Wei, JM	Liu, Daoming; Wei, Jianming	Modelling and simulation of continuous dense gas leakage for emergency response application	JOURNAL OF LOSS PREVENTION IN THE PROCESS INDUSTRIES	0950-4230	1873-3352		JUL	2017	48		14	20		10.1016/j.jlp.2017.03.026	WOS:000404303300002
J	See, L; Bayas, JCL; Schepaschenko, D; Perger, C; Dresel, C; Maus, V; Salk, C; Weichselbaum, J; Lesiv, M; McCallum, I; Moorthy, I; Fritz, S	See, Linda; Bayas, Juan Carlos Laso; Schepaschenko, Dmitry; Perger, Christoph; Dresel, Christopher; Maus, Victor; Salk, Carl; Weichselbaum, Juergen; Lesiv, Myroslava; McCallum, Ian; Moorthy, Inian; Fritz, Steffen	LACO-Wiki: A New Online Land Cover Validation Tool Demonstrated Using GlobeLand30 for Kenya	REMOTE SENSING		2072-4292		JUL	2017	9	7			754	10.3390/rs9070754	WOS:000406676800117
J	Liritzis, I; Bousoulegka, E; Nyquist, A; Castro, B; Alotaibi, FM; Drivaliari, A	Liritzis, Ioannis; Bousoulegka, Evgenia; Nyquist, Anne; Castro, Belen; Alotaibi, Fahad Mutlaq; Drivaliari, Androniki	New evidence from archaeoastronomy on Apollo oracles and Apollo-Asclepius related cult	JOURNAL OF CULTURAL HERITAGE	1296-2074	1778-3674		JUL-AUG	2017	26		129	143		10.1016/j.culher.2017.02.011	WOS:000407780400014
J	Qiao, BJ; Yi, CL	Qiao, Baojin; Yi, Chaolu	Reconstruction of Little Ice Age glacier area and equilibrium line attitudes in the central and western Himalaya	QUATERNARY INTERNATIONAL	1040-6182	1873-4553		JUL 15	2017	444		65	75		10.1016/j.quaint.2016.11.049	WOS:000406754700007
J	Dar, RA; Jaan, O; Murtaza, KO; Romshoo, SA	Dar, Reyaz Ahmad; Jaan, Omar; Murtaza, Khalid Omar; Romshoo, Shakil Ahmad	Glacial-geomorphic study of the Thajwas glacier valley, Kashmir Himalayas, India	QUATERNARY INTERNATIONAL	1040-6182	1873-4553		JUL 15	2017	444		157	171		10.1016/j.quaint.2017.05.021	WOS:000406754700015
J	Fallati, L; Savini, A; Sterlacchini, S; Galli, P	Fallati, Luca; Savini, Alessandra; Sterlacchini, Simone; Galli, Paolo	Land use and land cover (LULC) of the Republic of the Maldives: first national map and LULC change analysis using remote-sensing data	ENVIRONMENTAL MONITORING AND ASSESSMENT	0167-6369	1573-2959		AUG	2017	189	8			417	10.1007/s10661-017-6120-2	WOS:000410241300021	28748428
J	Moxley, JH; Bogomolni, A; Hammill, MO; Moore, KMT; Polito, MJ; Sette, L; Sharp, WB; Waring, GT; Gilbert, JR; Halpin, PN; Johnston, DW	Moxley, Jerry H.; Bogomolni, Andrea; Hammill, Mike O.; Moore, Kathleen M. T.; Polito, Michael J.; Sette, Lisa; Sharp, W. Brian; Waring, Gordon T.; Gilbert, James R.; Halpin, Patrick N.; Johnston, David W.	Google Haul Out: Earth Observation Imagery and Digital Aerial Surveys in Coastal Wildlife Management and Abundance Estimation	BIOSCIENCE	0006-3568	1525-3244		AUG	2017	67	8	760	768		10.1093/biosci/bix059	WOS:000406967600012	29599542
J	Mitra, SS; Mitra, D; Santra, A	Mitra, Shreyashi Santra; Mitra, D.; Santra, Abhisek	Performance testing of selected automated coastline detection techniques applied on multispectral satellite imageries	EARTH SCIENCE INFORMATICS	1865-0473	1865-0481		SEP	2017	10	3	321	330		10.1007/s12145-017-0289-3	WOS:000407240900003
J	Chen, XQ; Li, ZB; Wang, YH; Cui, ZY; Shi, CJ; Wu, HF	Chen, Xinqiang; Li, Zhibin; Wang, Yinhai; Cui, Zhiyong; Shi, Chaojian; Wu, Huafeng	Evaluating the impacts of grades on vehicular speeds on interstate highways	PLOS ONE	1932-6203			SEP 1	2017	12	9			e0184142	10.1371/journal.pone.0184142	WOS:000408816900031	28863157
J	Wang, JN; Liu, H; Wu, ZM; Li, YY	Wang, Jianan; Liu, Hui; Wu, Zemin; Li, Yingying	Landscape pattern analysis of the urban forest and green network structure in the Pudong district of Shanghai, China	REVISTA CHAPINGO SERIE CIENCIAS FORESTALES Y DEL AMBIENTE	0186-3231			SEP-DEC	2017	23	3	457	473		10.5154/r.rchscfa.2016.12.069	WOS:000409288800010
J	Gondocs, J; Breuer, H; Pongracz, R; Bartholy, J	Gondocs, Julia; Breuer, Hajnalka; Pongracz, Rita; Bartholy, Judit	Urban heat island mesoscale modelling study for the Budapest agglomeration area using the WRF model	URBAN CLIMATE	2212-0955			SEP	2017	21		66	86		10.1016/j.uclim.2017.05.005	WOS:000409192100004
J	Xu, JP; Liang, YH; Liu, J; Huang, ZF	Xu, Jieping; Liang, Yonghui; Liu, Jin; Huang, Zongfu	Multi-Frame Super-Resolution of Gaofen-4 Remote Sensing Images	SENSORS		1424-8220		SEP	2017	17	9			2142	10.3390/s17092142	WOS:000411484700212
J	Chen, M; Habib, A; He, HQ; Zhu, Q; Zhang, W	Chen, Min; Habib, Ayman; He, Haiqing; Zhu, Qing; Zhang, Wei	Robust Feature Matching Method for SAR and Optical Images by Using Gaussian-Gamma-Shaped Bi-Windows-Based Descriptor and Geometric Constraint	REMOTE SENSING		2072-4292		SEP	2017	9	9			882	10.3390/rs9090882	WOS:000414138700012
J	Tapias, JG; Ramirez, NEM; Melendez, MFA; Gutierrez, FAA; Montoya, CAM; Diederix, H	Gomez Tapias, Jorge; Montes Ramirez, Nohora E.; Almanza Melendez, Maria F.; Alcarcel Gutierrez, Fernando A.; Madrid Montoya, Cesar A.; Diederix, Hans	Geological Map of Colombia 2015	EPISODES	0705-3797			SEP	2017	40	3	201	212		10.18814/epiiugs/2017/v40i3/017023	WOS:000415393700003
J	Eichberger, A; Markovic, G; Magosi, Z; Rogic, B; Lex, C; Samiee, S	Eichberger, Arno; Markovic, Gerald; Magosi, Zoltan; Rogic, Branko; Lex, Cornelia; Samiee, Sajjad	A Car2X sensor model for virtual development of automated driving	INTERNATIONAL JOURNAL OF ADVANCED ROBOTIC SYSTEMS	1729-8814			SEP 7	2017	14	5			1729881417725625	10.1177/1729881417725625	WOS:000409475400001
J	Benassai, G; Aucelli, P; Budillon, G; De Stefano, M; Di Luccio, D; Di Paola, G; Montella, R; Mucerino, L; Sica, M; Pennetta, M	Benassai, Guido; Aucelli, Pietro; Budillon, Giorgio; De Stefano, Massimo; Di Luccio, Diana; Di Paola, Gianluigi; Montella, Raffaele; Mucerino, Luigi; Sica, Mario; Pennetta, Micla	Rip current evidence by hydrodynamic simulations, bathymetric surveys and UAV observation	NATURAL HAZARDS AND EARTH SYSTEM SCIENCES	1561-8633			SEP 12	2017	17	9	1493	1503		10.5194/nhess-17-1493-2017	WOS:000410510400001
J	He, YQ; Lee, E; Warner, TA	He, Yaqian; Lee, Eungul; Warner, Timothy A.	A time series of annual land use and land cover maps of China from 1982 to 2013 generated using AVHRR GIMMS NDVI3g data	REMOTE SENSING OF ENVIRONMENT	0034-4257	1879-0704		SEP 15	2017	199		201	217		10.1016/j.rse.2017.07.010	WOS:000410469100016
J	Wu, GX; Li, HJ; Liang, BC; Shi, FY; Kirby, JT; Mieras, R	Wu, Guoxiang; Li, Huajun; Liang, Bingchen; Shi, Fengyan; Kirby, James T.; Mieras, Ryan	Subgrid modeling of salt marsh hydrodynamics with effects of vegetation and vegetation zonation	EARTH SURFACE PROCESSES AND LANDFORMS	0197-9337	1096-9837		SEP 30	2017	42	12	1755	1768		10.1002/esp.4121	WOS:000411021500001
J	Triantafyllou, A; Watlet, A; Bastin, C	Triantafyllou, Antoine; Watlet, Arnaud; Bastin, Christophe	Geolokit: An interactive tool for visualising and exploring geoscientific data in Google Earth	INTERNATIONAL JOURNAL OF APPLIED EARTH OBSERVATION AND GEOINFORMATION	0303-2434			OCT	2017	62		39	46		10.1016/j.jag.2017.05.011	WOS:000408787100004
J	Danladi, IB; Kore, BM; Gul, M	Danladi, Iliya Bauchi; Kore, Basiru Mohammed; Gul, Murat	Vulnerability of the Nigerian coast: An insight into sea level rise owing to climate change and anthropogenic activities	JOURNAL OF AFRICAN EARTH SCIENCES	1464-343X	1879-1956		OCT	2017	134		493	503		10.1016/j.jafrearsci.2017.07.019	WOS:000412609000042
J	Du, HY; Cai, WB; Xu, YQ; Wang, ZB; Wang, YY; Cai, YL	Du, Hongyu; Cai, Wenbo; Xu, Yanqing; Wang, Zhibao; Wang, Yuanyuan; Cai, Yongli	Quantifying the cool island effects of urban green spaces using remote sensing Data	URBAN FORESTRY & URBAN GREENING	1618-8667			OCT	2017	27		24	31		10.1016/j.ufug.2017.06.008	WOS:000418470600004
J	Molinario, G; Hansen, MC; Potapov, PV; Tyukavina, A; Stehman, S; Barker, B; Humber, M	Molinario, G.; Hansen, M. C.; Potapov, P. V.; Tyukavina, A.; Stehman, S.; Barker, B.; Humber, M.	Quantification of land cover and land use within the rural complex of the Democratic Republic of Congo	ENVIRONMENTAL RESEARCH LETTERS	1748-9326			OCT	2017	12	10			104001	10.1088/1748-9326/aa8680	WOS:000411854500001
J	White, M; Haglund, L; Gloe, M; Bieger, K; Namphong, B; Gambone, M; Hardy, E; Gao, JG; Yen, H; Arnold, J	White, Michael; Haglund, Leighton; Gloe, Marcus; Bieger, Katrin; Namphong, Brandon; Gambone, Marilyn; Hardy, Eric; Gao, Jungang; Yen, Haw; Arnold, Jeff	Distribution of Selected Soil and Water Conservation Practices in the US as Identified with Google Earth	JOURNAL OF THE AMERICAN WATER RESOURCES ASSOCIATION	1093-474X	1752-1688		OCT	2017	53	5	1229	1240		10.1111/1752-1688.12552	WOS:000412132000017
J	Sidhu, N; Pebesma, E; Wang, YC	Sidhu, Nanki; Pebesma, Edzer; Wang, Yi-Chen	Usability Study to Assess the IGBP Land Cover Classification for Singapore	REMOTE SENSING		2072-4292		OCT	2017	9	10			1075	10.3390/rs9101075	WOS:000414650600105
J	Satyanarayana, B; Van der Stocken, T; Rans, G; Kodikara, KAS; Ronsmans, G; Jayatissa, LP; Husain, ML; Koedam, N; Dahdouh-Guebas, F	Satyanarayana, Behara; Van der Stocken, Tom; Rans, Guillaume; Kodikara, Kodikara Arachchilage Sunanda; Ronsmans, Gaetane; Jayatissa, Loku Pulukkuttige; Husain, Mohd-Lokman; Koedam, Nico; Dahdouh-Guebas, Farid	Island-wide coastal vulnerability assessment of Sri Lanka reveals that sand dunes, planted trees and natural vegetation may play a role as potential barriers against ocean surges	GLOBAL ECOLOGY AND CONSERVATION	2351-9894			OCT	2017	12		144	157		10.1016/j.gecco.2017.10.001	WOS:000426355300013
J	Gamshadzaei, MH; Rahimzadegan, M	Gamshadzaei, Mohammad Hossein; Rahimzadegan, Majid	Stable and accurate methods for identification of water bodies from Landsat series imagery using meta-heuristic algorithms	JOURNAL OF APPLIED REMOTE SENSING	1931-3195			OCT 17	2017	11				45005	10.1117/1.JRS.11.045005	WOS:000413250500002
J	Thorpe, AK; Frankenberg, C; Thompson, DR; Duren, RM; Aubrey, AD; Bue, BD; Green, RO; Gerilowski, K; Krings, T; Borchardt, J; Kort, EA; Sweeney, C; Conley, S; Roberts, DA; Dennison, PE	Thorpe, Andrew K.; Frankenberg, Christian; Thompson, David R.; Duren, Riley M.; Aubrey, Andrew D.; Bue, Brian D.; Green, Robert O.; Gerilowski, Konstantin; Krings, Thomas; Borchardt, Jakob; Kort, Eric A.; Sweeney, Colm; Conley, Stephen; Roberts, Dar A.; Dennison, Philip E.	Airborne DOAS retrievals of methane, carbon dioxide, and water vapor concentrations at high spatial resolution: application to AVIRIS-NG	ATMOSPHERIC MEASUREMENT TECHNIQUES	1867-1381	1867-8548		OCT 19	2017	10	10	3833	3850		10.5194/amt-10-3833-2017	WOS:000413216200002
J	Cardoso, P	Cardoso, Pedro	red - an R package to facilitate species red list assessments according to the IUCN criteria	BIODIVERSITY DATA JOURNAL	1314-2836	1314-2828		OCT 19	2017	5				e20530	10.3897/BDJ.5.e20530	WOS:000449748500001	29104439
J	Li, XB; Wang, SJ	Li, Xiaobin; Wang, Shengjin	Object Detection Using Convolutional Neural Networks in a Coarse-to-Fine Manner	IEEE GEOSCIENCE AND REMOTE SENSING LETTERS	1545-598X	1558-0571		NOV	2017	14	11	2037	2041		10.1109/LGRS.2017.2749478	WOS:000413955500032
J	Liu, BY; Wang, SJ	Liu Boyi; Wang Suiji	Planform characteristics and development of interchannel wetlands in a gravel-bed anastomosing river, Maqu Reach of the Upper Yellow River	JOURNAL OF GEOGRAPHICAL SCIENCES	1009-637X	1861-9568		NOV	2017	27	11	1376	1388		10.1007/s11442-017-1441-1	WOS:000413227400006
J	Cheng, Y; Zhu, HT; Zeng, HL; Liu, QH; Zhu, X	Cheng, Yuan; Zhu, Hongtao; Zeng, Hongliu; Liu, Qianghu; Zhu, Xiu	Differential source-to-sink system analysis for three types of stepped terrains in China	INTERPRETATION-A JOURNAL OF SUBSURFACE CHARACTERIZATION	2324-8858	2324-8866		NOV	2017	5	4	ST1	ST9		10.1190/INT-2017-0028.1	WOS:000412938100024
J	Torizin, J; Fuchs, M; Awan, AA; Ahmad, I; Akhtar, SS; Sadiq, S; Razzak, A; Weggenmann, D; Fawad, F; Khalid, N; Sabir, F; Khan, AJ	Torizin, Jewgenij; Fuchs, Michael; Awan, Adnan Alam; Ahmad, Ijaz; Akhtar, Sardar Saeed; Sadiq, Simon; Razzak, Asif; Weggenmann, Daniel; Fawad, Faseeh; Khalid, Nimra; Sabir, Faisan; Khan, Ahsan Jamal	Statistical landslide susceptibility assessment of the Mansehra and Torghar districts, Khyber Pakhtunkhwa Province, Pakistan	NATURAL HAZARDS	0921-030X	1573-0840		NOV	2017	89	2	757	784		10.1007/s11069-017-2992-2	WOS:000412556000014
J	Lin, L; Pussella, P	Lin, Li; Pussella, Pgrni	Assessment of vulnerability for coastal erosion with GIS and AHP techniques case study: Southern coastline of Sri Lanka	NATURAL RESOURCE MODELING	0890-8575	1939-7445		NOV	2017	30	4			e12146	10.1111/nrm.12146	WOS:000414610200005
J	Cai, BW; Jiang, ZG; Zhang, HP; Zhao, DP; Yao, Y	Cai, Bowen; Jiang, Zhiguo; Zhang, Haopeng; Zhao, Danpei; Yao, Yuan	Airport Detection Using End-to-End Convolutional Neural Network with Hard Example Mining	REMOTE SENSING		2072-4292		NOV	2017	9	11			1198	10.3390/rs9111198	WOS:000416554100112
J	Tao, TT; Abades, S; Teng, SQ; Huang, ZYX; Reino, L; Chen, BJW; Zhang, Y; Xu, C; Svenning, JC	Tao, Tingting; Abades, Sebastian; Teng, Shuqing; Huang, Zheng Y. X.; Reino, Luis; Chen, Bin J. W.; Zhang, Yong; Xu, Chi; Svenning, Jens-Christian	Macroecological factors shape local-scale spatial patterns in agriculturalist settlements	PROCEEDINGS OF THE ROYAL SOCIETY B-BIOLOGICAL SCIENCES	0962-8452	1471-2954		NOV 15	2017	284	1866			20172003	10.1098/rspb.2017.2003	WOS:000414773600023	29118138
J	Sit, SM; Brudzinski, MR	Sit, Stefany M.; Brudzinski, Michael R.	Creation and Assessment of an Active e-Learning Introductory Geology Course	JOURNAL OF SCIENCE EDUCATION AND TECHNOLOGY	1059-0145	1573-1839		DEC	2017	26	6	629	645		10.1007/s10956-017-9703-3	WOS:000413301100005
J	Hou, B; Wang, YH; Liu, QJ	Hou, Bin; Wang, Yunhong; Liu, Qingjie	Change Detection Based on Deep Features and Low Rank	IEEE GEOSCIENCE AND REMOTE SENSING LETTERS	1545-598X	1558-0571		DEC	2017	14	12	2418	2422		10.1109/LGRS.2017.2766840	WOS:000418116500050
J	Azzari, G; Lobell, DB	Azzari, G.; Lobell, D. B.	Landsat-based classification in the cloud: An opportunity for a paradigm shift in land cover monitoring	REMOTE SENSING OF ENVIRONMENT	0034-4257	1879-0704		DEC 1	2017	202		64	74		10.1016/j.rse.2017.05.025	WOS:000418464000007
J	Salinas-Jasso, JA; Salinas-Jasso, RA; Montalvo-Arrieta, JC; Alva-Nino, E	Salinas-Jasso, Jorge A.; Salinas-Jasso, Ricardo A.; Montalvo-Arrieta, Juan C.; Alva-Nino, Efrain	Landslide inventory of the southern sector of the Monterrey salient. Case of study: Santa Rosa canyon, Nuevo Leon, northeastern Mexico	REVISTA MEXICANA DE CIENCIAS GEOLOGICAS	1026-8774			DEC	2017	34	3	182	198		10.22201/cgeo.20072902e.2017.3.459	WOS:000417013800003
J	Peethambaran, J; Wang, RS	Peethambaran, Jiju; Wang, Ruisheng	Enhancing Urban Facades via LiDAR-Based Sculpting	COMPUTER GRAPHICS FORUM	0167-7055	1467-8659		DEC	2017	36	8	511	528		10.1111/cgf.13097	WOS:000417496200035
J	Zhang, G; Xu, K; Huang, WC	Zhang, Guo; Xu, Kai; Huang, Wenchao	Auto-calibration of GF-1 WFV images using flat terrain	ISPRS JOURNAL OF PHOTOGRAMMETRY AND REMOTE SENSING	0924-2716	1872-8235		DEC	2017	134		59	69		10.1016/j.isprsjprs.2017.10.009	WOS:000418220800005
J	Singh, K; Kumar, V	Singh, Kanwarpreet; Kumar, Virender	Landslide hazard mapping along national highway-154A in Himachal Pradesh, India using information value and frequency ratio	ARABIAN JOURNAL OF GEOSCIENCES	1866-7511	1866-7538		DEC	2017	10	24			539	10.1007/s12517-017-3315-3	WOS:000419041400026
J	Guirado, E; Tabik, S; Alcaraz-Segura, D; Cabello, J; Herrera, F	Guirado, Emilio; Tabik, Siham; Alcaraz-Segura, Domingo; Cabello, Javier; Herrera, Francisco	Deep-learning Versus OBIA for Scattered Shrub Detection with Google Earth Imagery: Ziziphus lotus as Case Study	REMOTE SENSING		2072-4292		DEC	2017	9	12			1220	10.3390/rs9121220	WOS:000419235700016
J	de Mola, UL; Ladd, B; Duarte, S; Borchard, N; La Rosa, RA; Zutta, B	Loret de Mola, Ursula; Ladd, Brenton; Duarte, Sandra; Borchard, Nils; La Rosa, Ruy Anaya; Zutta, Brian	On the Use of Hedonic Price Indices to Understand Ecosystem Service Provision from Urban Green Space in Five Latin American Megacities	FORESTS	1999-4907			DEC	2017	8	12			478	10.3390/f8120478	WOS:000419210800019
J	Brown, GG; DeGrange, WC; Price, WL; Rowe, AA	Brown, Gerald G.; DeGrange, Walter C.; Price, Wilson L.; Rowe, Anton A.	Scheduling combat logistics force replenishments at sea for the US Navy	NAVAL RESEARCH LOGISTICS	0894-069X	1520-6750		DEC	2017	64	8	677	693		10.1002/nav.21780	WOS:000426793700005
J	Banda, HT; Thomson, R; Mortimer, K; Bello, GAF; Mbera, GB; Malmborg, R; Faragher, B; Squire, SB	Banda, Hastings T.; Thomson, Rachael; Mortimer, Kevin; Bello, George A. F.; Mbera, Grace B.; Malmborg, Rasmus; Faragher, Brian; Squire, S. Bertel	Community prevalence of chronic respiratory symptoms in rural Malawi: Implications for policy	PLOS ONE	1932-6203			DEC 7	2017	12	12			e0188437	10.1371/journal.pone.0188437	WOS:000417337800022	29216193
J	Hu, CQ; Chen, NH; Kapp, P; Chen, JY; Xiao, AC; Zhao, YH	Hu, Chengqing; Chen, Ninghua; Kapp, Paul; Chen, Jianyu; Xiao, Ancheng; Zhao, Yanhui	Yardang geometries in the Qaidam Basin and their controlling factors	GEOMORPHOLOGY	0169-555X	1872-695X		DEC 15	2017	299		142	151		10.1016/j.geomorph.2017.09.029	WOS:000418221700012
J	Hotta, K; Iguchi, M	Hotta, Kohei; Iguchi, Masato	Ground deformation source model at Kuchinoerabu-jima volcano during 2006-2014 as revealed by campaign GPS observation	EARTH PLANETS AND SPACE	1880-5981			DEC 22	2017	69				173	10.1186/s40623-017-0763-7	WOS:000418609400001
J	Johansson, US; Nylinder, S; Ohlson, JI; Tietze, DT	Johansson, Ulf S.; Nylinder, Stephan; Ohlson, Jan I.; Tietze, Dieter Thomas	Reconstruction of the late Miocene biogeographical history of tits and chickadees (Aves: Passeriformes: Paridae): A comparison between discrete area analyses and probabilistic diffusion approach	JOURNAL OF BIOGEOGRAPHY	0305-0270	1365-2699		JAN	2018	45	1	14	25		10.1111/jbi.13095	WOS:000418933400002
J	Smith, SG; Wegmann, KW	Smith, Stephen G.; Wegmann, Karl W.	Precipitation, landsliding, and erosion across the Olympic Mountains, Washington State, USA	GEOMORPHOLOGY	0169-555X	1872-695X		JAN 1	2018	300		141	150		10.1016/j.geomorph.2017.10.008	WOS:000418981700010
J	Treves, R; Skarlatidou, A	Treves, Richard; Skarlatidou, Artemis	What path and how fast? The effect of flight time and path on user spatial understanding in map tour animations	CARTOGRAPHY AND GEOGRAPHIC INFORMATION SCIENCE	1523-0406	1545-0465			2018	45	2	128	139		10.1080/15230406.2016.1275812	WOS:000422727500003
J	Theerawasttanasiri, N; Taneepanichskul, S; Pingchai, W; Nimchareon, Y; Sriwichai, S	Theerawasttanasiri, Nonthaphat; Taneepanichskul, Surasak; Pingchai, Wichain; Nimchareon, Yuwaree; Sriwichai, Sangworn	Implementing a geographical information system to assess endemic fluoride areas in Lamphun, Thailand	RISK MANAGEMENT AND HEALTHCARE POLICY	1179-1594				2018	11		15	24		10.2147/RMHP.S147016	WOS:000424279600001	29398924
J	Jones, DB; Harrison, S; Anderson, K; Selley, HL; Wood, JL; Betts, RA	Jones, D. B.; Harrison, S.; Anderson, K.; Selley, H. L.; Wood, J. L.; Betts, R. A.	The distribution and hydrological significance of rock glaciers in the Nepalese Himalaya	GLOBAL AND PLANETARY CHANGE	0921-8181	1872-6364		JAN	2018	160		123	142		10.1016/j.gloplacha.2017.11.005	WOS:000424186200009
J	Prins, E	Prins, Erik	Landsat approaches to map agro-pastoral farming in the wetlands of southern Sudan	INTERNATIONAL JOURNAL OF REMOTE SENSING	0143-1161	1366-5901			2018	39	3	854	878		10.1080/01431161.2017.1392634	WOS:000427373300015
J	Feng, DL; Yu, L; Zhao, YY; Cheng, YQ; Xu, YD; Li, CC; Gong, P	Feng, Duole; Yu, Le; Zhao, Yuanyan; Cheng, Yuqi; Xu, Yidi; Li, Congcong; Gong, Peng	A multiple dataset approach for 30-m resolution land cover mapping: a case study of continental Africa	INTERNATIONAL JOURNAL OF REMOTE SENSING	0143-1161	1366-5901			2018	39	12	3926	3938		10.1080/01431161.2018.1452073	WOS:000427866600009
J	Kumar, SS; Roy, DP	Kumar, S. S.; Roy, D. P.	Global operational land imager Landsat-8 reflectance-based active fire detection algorithm	INTERNATIONAL JOURNAL OF DIGITAL EARTH	1753-8947	1753-8955			2018	11	2	154	178		10.1080/17538947.2017.1391341	WOS:000428619200002
J	Hsu, HP; Tsai, BW; Chen, CM	Hsu, Hsiao-Ping; Tsai, Bor-Wen; Chen, Che-Ming	Teaching Topographic Map Skills and Geomorphology Concepts with Google Earth in a One-Computer Classroom	JOURNAL OF GEOGRAPHY	0022-1341	1752-6868			2018	117	1	29	39		10.1080/00221341.2017.1346138	WOS:000428716400003
J	Kalaivanan, K; Gurugnanam, B; Isai, R	Kalaivanan, K.; Gurugnanam, B.; Isai, R.	Automated drainage extraction using spatial technologies, Kodavanar river basin, South India	INDIAN JOURNAL OF GEO-MARINE SCIENCES	0379-5136	0975-1033		JAN	2018	47	1	228	230			WOS:000428970000028
J	Kim, M	Kim, Minsung	Project-based community participatory action research using geographic information technologies	JOURNAL OF GEOGRAPHY IN HIGHER EDUCATION	0309-8265	1466-1845			2018	42	1	61	79		10.1080/03098265.2017.1335294	WOS:000427276100006
J	Lee, YS; Sohn, BS	Lee, Yea Som; Sohn, Bong-Soo	Immersive Gesture Interfaces for Navigation of 3D Maps in HMD-Based Mobile Virtual Environments	MOBILE INFORMATION SYSTEMS	1574-017X	1875-905X			2018	2018				2585797	10.1155/2018/2585797	WOS:000432801500001
J	Singh, R; Shekhar, M; Pandey, VK; Kumar, R; Sharma, RK	Singh, Rupendra; Shekhar, Mayank; Pandey, Vijendra Kumar; Kumar, Rajesh; Sharma, R. K.	Causes and geomorphological effects of large debris flows in the lower valley areas of the Meru and Gangotri glaciers, Bhagirathi basin, Garhwal Himalaya (India)	REMOTE SENSING LETTERS	2150-704X	2150-7058			2018	9	8	809	818		10.1080/2150704X.2018.1484956	WOS:000434447900001
J	Lorenza, TMM; Demetrio, SFR; Mario, RMM; Erasmo, RG; Luis, GRJ	Maria Lorenza, Toledo-Medrano; Fernandez-Reynoso Demetrio, S.; Martinez-Menez Mario, R.; Erasmo, Rubio-Granados; Jose Luis, Garcia-Rodriguez	IDENTIFICATION OF ENVIRONMENTAL COVARIABLES THAT INFLUENCE GULLY FORMATION IN THE MIXTECA REGION	REVISTA INTERNACIONAL DE CONTAMINACION AMBIENTAL	0188-4999				2018	34		71	76			WOS:000437423400014
J	Follmann, A; Hartmann, G; Dannenberg, P	Follmann, Alexander; Hartmann, Gideon; Dannenberg, Peter	Multi-temporal transect analysis of peri-urban developments in Faridabad, India	JOURNAL OF MAPS	1744-5647				2018	14	1	17	25		10.1080/17445647.2018.1424656	WOS:000441787300003
J	Dasari, K; Lokam, A	Dasari, Kiran; Lokam, Anjaneyulu	Exploring the Capability of Compact Polarimetry (Hybrid Pol) C Band RISAT-1 Data for Land Cover Classification	IEEE ACCESS	2169-3536				2018	6		57981	57993		10.1109/ACCESS.2018.2873348	WOS:000449001800001
J	Wrublack, SC; Mercante, E; Boas, MAV; Prudente, VHR; Silva, JLG	Wrublack, Suzana C.; Mercante, Erivelto; Vilas Boas, Marcio A.; Prudente, Victor H. R.; Silva, Jefferson L. G.	VARIATION OF WATER QUALITY ALONG A RIVER IN AGRICULTURAL WATERSHED WITH SUPPORT OF GEOGRAPHIC INFORMATION SYSTEMS AND MULTIVARIATE ANALYSIS	ENGENHARIA AGRICOLA	0100-6916			JAN-FEB	2018	38	1	74	81		10.1590/1809-4430-Eng.Agric.v38n1p74-81/2018	WOS:000428124100010
J	Mir, RA; Majeed, Z	Mir, Riyaz Ahmad; Majeed, Zahid	Frontal recession of Parkachik Glacier between 1971-2015, Zanskar Himalaya using remote sensing and field data	GEOCARTO INTERNATIONAL	1010-6049	1752-0762			2018	33	2	163	177		10.1080/10106049.2016.1232439	WOS:000427850900004
J	Friedel, MJ; Buscema, M; Vicente, LE; Iwashita, F; Koga-Vicente, A	Friedel, Michael J.; Buscema, Massimo; Vicente, Luiz Eduardo; Iwashita, Fabio; Koga-Vicente, Andrea	Mapping fractional landscape soils and vegetation components from Hyperion satellite imagery using an unsupervised machine-learning workflow	INTERNATIONAL JOURNAL OF DIGITAL EARTH	1753-8947	1753-8955			2018	11	7	670	690		10.1080/17538947.2017.1349841	WOS:000432899200002
J	Mondal, S; Jeganathan, C	Mondal, Saptarshi; Jeganathan, C.	Mountain agriculture extraction from time-series MODIS NDVI using dynamic time warping technique	INTERNATIONAL JOURNAL OF REMOTE SENSING	0143-1161	1366-5901			2018	39	11	3679	3704		10.1080/01431161.2018.1444289	WOS:000428581700011
J	Cheng, YQ; Yu, L; Xu, YD; Liu, XX; Lu, H; Cracknell, AP; Kanniah, K; Gong, P	Cheng, Yuqi; Yu, Le; Xu, Yidi; Liu, Xiaoxuan; Lu, Hui; Cracknell, Arthur P.; Kanniah, Kasturi; Gong, Peng	Towards global oil palm plantation mapping using remote-sensing data	INTERNATIONAL JOURNAL OF REMOTE SENSING	0143-1161	1366-5901			2018	39	18	5891	5906		10.1080/01431161.2018.1492182	WOS:000451744100008
J	Chen, Z; Zhang, T; Ouyang, C	Chen, Zhong; Zhang, Ting; Ouyang, Chao	End-to-End Airplane Detection Using Transfer Learning in Remote Sensing Images	REMOTE SENSING		2072-4292		JAN	2018	10	1			139	10.3390/rs10010139	WOS:000424092300137
J	Yang, X; Sun, H; Fu, K; Yang, JR; Sun, X; Yan, ML; Guo, Z	Yang, Xue; Sun, Hao; Fu, Kun; Yang, Jirui; Sun, Xian; Yan, Menglong; Guo, Zhi	Automatic Ship Detection in Remote Sensing Images from Google Earth of Complex Scenes Based on Multiscale Rotation Dense Feature Pyramid Networks	REMOTE SENSING		2072-4292		JAN	2018	10	1			132	10.3390/rs10010132	WOS:000424092300130
J	Mohammadi, A; Shahabi, H; Bin Ahmad, B	Mohammadi, A.; Shahabi, H.; Bin Ahmad, B.	INTEGRATION OF INSAR TECHNIQUE, GOOGLE EARTH IMAGES AND EXTENSIVE FIELD SURVEY FOR LANDSLIDE INVENTORY IN A PART OF CAMERON HIGHLANDS, PAHANG, MALAYSIA	APPLIED ECOLOGY AND ENVIRONMENTAL RESEARCH	1589-1623	1785-0037			2018	16	6	8075	8091		10.15666/aeer/1606_80758091	WOS:000454233300046
J	Fourniotis, NT; Horsch, GM; Leftheriotis, GA	Fourniotis, Nikolaos Th.; Horsch, Georgios M.; Leftheriotis, Georgios A.	Wind and Tide-Induced Hydrodynamics and Sedimentation of Two Tidal Inlets in Western Greece	PERIODICA POLYTECHNICA-CIVIL ENGINEERING	0553-6626				2018	62	4	851	857		10.3311/PPci.11343	WOS:000459908800002
J	Yin, SL; Zhang, Y; Karim, S	Yin, Shoulin; Zhang, Ye; Karim, Shahid	Large Scale Remote Sensing Image Segmentation Based on Fuzzy Region Competition and Gaussian Mixture Mlodel	IEEE ACCESS	2169-3536				2018	6		26069	26080		10.1109/ACCESS.2018.2834960	WOS:000434934800001
J	Al Nuaimy, QAM	Al Nuaimy, Qahtan A. M.	New quantitative data on Omphalocyclus from the Maastrichtian in Northern Iraq	JOURNAL OF AFRICAN EARTH SCIENCES	1464-343X	1879-1956		FEB	2018	138		319	335		10.1016/j.jafrearsci.2017.11.016	WOS:000423637800025
J	Santos, RT; Silva, E; Carrijo, GA	Santos, R. T.; Silva, E., Jr.; Carrijo, G. A.	Waveguide Propagation Model and Measurements for Mobile Systems in Brazilian Cities	IEEE LATIN AMERICA TRANSACTIONS	1548-0992			FEB	2018	16	2	435	443			WOS:000429106500018
J	Platt, RV; Manthos, D; Amos, J	Platt, Rutherford V.; Manthos, David; Amos, John	Estimating the Creation and Removal Date of Fracking Ponds Using Trend Analysis of Landsat Imagery	ENVIRONMENTAL MANAGEMENT	0364-152X	1432-1009		FEB	2018	61	2	310	320		10.1007/s00267-017-0983-4	WOS:000424273700012	29305754
J	Ozkan, M; Celik, OF; Ozyavas, A	Ozkan, Mutlu; Celik, Omer Faruk; Ozyavas, Aziz	Lithological discrimination of accretionary complex (Sivas, northern Turkey) using novel hybrid color composites and field data	JOURNAL OF AFRICAN EARTH SCIENCES	1464-343X	1879-1956		FEB	2018	138		75	85		10.1016/j.jafrearsci.2017.11.009	WOS:000423637800007
J	Wang, JL; Ni, JP; Chen, CL; Xie, DT; Shao, JA; Chen, FX; Lei, P	Wang Jin-liang; Ni Jiu-pai; Chen Cheng-long; Xie De-ti; Shao Jing-an; Chen Fang-xin; Lei Ping	Source-sink landscape spatial characteristics and effect on non-point source pollution in a small catchment of the Three Gorge Reservoir Region	JOURNAL OF MOUNTAIN SCIENCE	1672-6316	1993-0321		FEB	2018	15	2	327	339		10.1007/s11629-017-4417-9	WOS:000425160200009
J	He, HQ; Chen, M; Chen, T; Li, DJ	He, Haiqing; Chen, Min; Chen, Ting; Li, Dajun	Matching of Remote Sensing Images with Complex Background Variations via Siamese Convolutional Neural Network	REMOTE SENSING		2072-4292		FEB	2018	10	2			355	10.3390/rs10020355	WOS:000427542100199
J	Ruiz, P; Mana, S; Gutierrez, A; Alarcon, G; Garro, J; Soto, GJ	Ruiz, Paulo; Mana, Sara; Gutierrez, Amalia; Alarcon, Gerardo; Garro, Jose; Soto, Gerardo J.	Geomorphological Insights on Human-Volcano Interactions and Use of Volcanic Materials in Pre-Hispanic Cultures of Costa Rica through the Holocene	FRONTIERS IN EARTH SCIENCE		2296-6463		FEB 19	2018	6				13	10.3389/feart.2018.00013	WOS:000429860300001
J	Robinson, JT; Turner, D; Durand, NC; Thorvaldsdottir, H; Mesirov, JP; Aiden, EL	Robinson, James T.; Turner, Douglass; Durand, Neva C.; Thorvaldsdottir, Helga; Mesirov, Jill P.; Aiden, Erez Lieberman	Juicebox.js Provides a Cloud-Based Visualization System for Hi-C Data	CELL SYSTEMS	2405-4712	2405-4720		FEB 28	2018	6	2	256	+		10.1016/j.cels.2018.01.001	WOS:000427421500014	29428417
J	Ren, JJ; Xu, XW; Zhang, SM; Yeats, RS; Chen, JW; Zhu, AL; Liu, S	Ren, Junjie; Xu, Xiwei; Zhang, Shimin; Yeats, Robert S.; Chen, Jiawei; Zhu, Ailan; Liu, Shao	Surface rupture of the 1933 M 7.5 Diexi earthquake in eastern Tibet: implications for seismogenic tectonics	GEOPHYSICAL JOURNAL INTERNATIONAL	0956-540X	1365-246X		MAR	2018	212	3	1627	1644		10.1093/gji/ggx498	WOS:000427926300009
J	Abdollahi, A; Bakhtiari, HRR; Nejad, MP	Abdollahi, Abolfazl; Bakhtiari, Hamid Reza Riyahi; Nejad, Mojgan Pashaei	Investigation of SVM and Level Set Interactive Methods for Road Extraction from Google Earth Images	JOURNAL OF THE INDIAN SOCIETY OF REMOTE SENSING	0255-660X	0974-3006		MAR	2018	46	3	423	430		10.1007/s12524-017-0702-x	WOS:000429581500010
J	Moharana, PC; Nagdev, R; Burman, U	Moharana, P. C.; Nagdev, Ritu; Burman, Uday	Utilizing Geo-information Tools for Mapping Spatio-temporal Changes in Population of Prosopis cineraria (khejri) in Agroforestry System of Arid Western Rajasthan	JOURNAL OF THE INDIAN SOCIETY OF REMOTE SENSING	0255-660X	0974-3006		MAR	2018	46	3	431	442		10.1007/s12524-017-0701-y	WOS:000429581500011
J	Wilson, R; Glasser, NF; Reynolds, JM; Harrison, S; Anacona, PI; Schaefer, M; Shannon, S	Wilson, Ryan; Glasser, Neil F.; Reynolds, John M.; Harrison, Stephan; Anacona, Pablo Iribarren; Schaefer, Marius; Shannon, Sarah	Glacial lakes of the Central and Patagonian Andes	GLOBAL AND PLANETARY CHANGE	0921-8181	1872-6364		MAR	2018	162		275	291		10.1016/j.gloplacha.2018.01.004	WOS:000427999900020
J	Zou, ZX; Shi, ZW	Zou, Zhengxia; Shi, Zhenwei	Random Access Memories: A New Paradigm for Target Detection in High Resolution Aerial Remote Sensing Images	IEEE TRANSACTIONS ON IMAGE PROCESSING	1057-7149	1941-0042		MAR	2018	27	3	1100	1111		10.1109/TIP.2017.2773199	WOS:000418092400006	29220314
J	Ouma, PO; Maina, J; Thuranira, PN; Macharia, PM; Alegana, VA; English, M; Okiro, EA; Snow, RW	Ouma, Paul O.; Maina, Joseph; Thuranira, Pamela N.; Macharia, Peter M.; Alegana, Victor A.; English, Mike; Okiro, Emelda A.; Snow, Robert W.	Access to emergency hospital care provided by the public sector in sub-Saharan Africa in 2015: a geocoded inventory and spatial analysis	LANCET GLOBAL HEALTH	2214-109X			MAR	2018	6	3	E342	E350		10.1016/S2214-109X(17)30488-6	WOS:000424738900024	29396220
J	Kazi, BU; Wainer, G	Kazi, Baha Uddin; Wainer, Gabriel	Integrated cellular framework for modeling ecosystems: Theory and applications	SIMULATION-TRANSACTIONS OF THE SOCIETY FOR MODELING AND SIMULATION INTERNATIONAL	0037-5497	1741-3133		MAR	2018	94	3	213	233		10.1177/0037549717706007	WOS:000429939600004
J	Chen, JB; Yue, AZ; Wang, CY; Huang, QQ; Chen, JS; Meng, Y; He, DX	Chen, Jingbo; Yue, Anzhi; Wang, Chengyi; Huang, Qingqing; Chen, Jiansheng; Meng, Yu; He, Dongxu	Wind turbine extraction from high spatial resolution remote sensing images based on saliency detection	JOURNAL OF APPLIED REMOTE SENSING	1931-3195			MAR 24	2018	12	1			16041	10.1117/1.JRS.12.016041	WOS:000430154700001
J	Ipsen, HA; Principato, SM; Grube, RE; Lee, JF	Ipsen, Heather A.; Principato, Sarah M.; Grube, Rachael E.; Lee, Jessica F.	Spatial analysis of cirques from three regions of Iceland: implications for cirque formation and palaeoclimate	BOREAS	0300-9483	1502-3885		APR	2018	47	2	565	576		10.1111/bor.12295	WOS:000428369500013
J	Miao, ZM; Fu, K; Sun, H; Sun, X; Yan, ML	Miao, Ziming; Fu, Kun; Sun, Hao; Sun, Xian; Yan, Menglong	Automatic Water-Body Segmentation From High-Resolution Satellite Images via Deep Networks	IEEE GEOSCIENCE AND REMOTE SENSING LETTERS	1545-598X	1558-0571		APR	2018	15	4	602	606		10.1109/LGRS.2018.2794545	WOS:000428632800025
J	Nath, CD; Aravajy, S; Razasekaran, D; Muthusankar, G	Nath, Cheryl D.; Aravajy, S.; Razasekaran, D.; Muthusankar, G.	Heritage conservation and environmental threats at the 192-year-old botanical garden in Pondicherry, India	URBAN FORESTRY & URBAN GREENING	1618-8667			APR	2018	31		241	251		10.1016/j.ufug.2018.02.004	WOS:000430594600023
J	Shrestha, S; Kang, TS; Choi, JC	Shrestha, Suchita; Kang, Tae-Seob; Choi, Jung Chang	Assessment of co-seismic landslide susceptibility using LR and ANCOVA in Barpak region, Nepal	JOURNAL OF EARTH SYSTEM SCIENCE	2347-4327	0973-774X		APR	2018	127	3			38	10.1007/s12040-018-0936-1	WOS:000433089500004
J	Lau, L; Quan, YM; Wan, JJ; Zhou, N; Wen, CH; Qian, N; Jing, FM	Lau, Lawrence; Quan, Yiming; Wan, Jingjing; Zhou, Ning; Wen, Conghua; Qian, Nie; Jing, Faming	An Autonomous Ultra-Wide Band-Based Attitude and Position Determination Technique for Indoor Mobile Laser Scanning	ISPRS INTERNATIONAL JOURNAL OF GEO-INFORMATION	2220-9964			APR	2018	7	4			155	10.3390/ijgi7040155	WOS:000435186000028
J	Toubal, AK; Achite, M; Ouillon, S; Dehni, A	Toubal, Abderrezak Kamel; Achite, Mohammed; Ouillon, Sylvain; Dehni, Abdelatif	Soil erodibility mapping using the RUSLE model to prioritize erosion control in the Wadi Sahouat basin, North-West of Algeria	ENVIRONMENTAL MONITORING AND ASSESSMENT	0167-6369	1573-2959		APR	2018	190	4			210	10.1007/s10661-018-6580-z	WOS:000429054600035	29532173
J	Zhang, Q; Yi, CL; Fu, P; Wu, YB; Liu, JH; Wang, NL	Zhang, Qian; Yi, Chaolu; Fu, Ping; Wu, Yubin; Liu, Jinhua; Wang, Ninglian	Glacier change in the Gangdise Mountains, southern Tibet, since the Little Ice Age	GEOMORPHOLOGY	0169-555X	1872-695X		APR 1	2018	306		51	63		10.1016/j.geomorph.2018.01.002	WOS:000427344100005
J	Chen, HL; Liang, QH; Liu, Y; Xie, SG	Chen, Huili; Liang, Qiuhua; Liu, Yong; Xie, Shuguang	Hydraulic correction method (HCM) to enhance the efficiency of SRTM DEM in flood modeling	JOURNAL OF HYDROLOGY	0022-1694	1879-2707		APR	2018	559		56	70		10.1016/j.jhydrol.2018.01.056	WOS:000430902000005
J	Tapete, D; Cigna, F	Tapete, Deodato; Cigna, Francesca	Appraisal of Opportunities and Perspectives for the Systematic Condition Assessment of Heritage Sites with Copernicus Sentinel-2 High-Resolution Multispectral Imagery	REMOTE SENSING	2072-4292			APR	2018	10	4			561	10.3390/rs10040561	WOS:000435187500073
J	Cai, WT; Geng, H; Cai, LC; Chong, XL	Cai, Wantong; Geng, Hao; Cai, Liangcai; Chong, Xiaolei	Evaluation and management system design for airfield clearance condition	CURRENT SCIENCE	0011-3891			APR 10	2018	114	7	1451	1460		10.18520/cs/v114/i07/1451-1460	WOS:000429353700026
J	Estoque, RC; Pontius, RG; Murayama, Y; Hou, H; Thapa, RB; Lasco, RD; Villar, MA	Estoque, Ronald C.; Pontius, Robert G., Jr.; Murayama, Yuji; Hou, Hao; Thapa, Rajesh B.; Lasco, Rodel D.; Villar, Merlito A.	Simultaneous comparison and assessment of eight remotely sensed maps of Philippine forests	INTERNATIONAL JOURNAL OF APPLIED EARTH OBSERVATION AND GEOINFORMATION	0303-2434			MAY	2018	67		123	134		10.1016/j.jag.2017.10.008	WOS:000427307800011
J	Yao, XJ; Sun, MP; Gong, P; Liu, BK; Li, XF; An, LN; Yan, LX	Yao, Xiaojun; Sun, Meiping; Gong, Peng; Liu, Baokang; Li, Xiaofeng; An, Lina; Yan, Luxia	Overflow probability of the Salt Lake in Hoh Xil Region	JOURNAL OF GEOGRAPHICAL SCIENCES	1009-637X	1861-9568		MAY	2018	28	5	647	655		10.1007/s11442-018-1496-7	WOS:000428062100007
J	Swanger, W; Admassu, Y	Swanger, William; Admassu, Yonathan	Using Google Earth and Google Street View to Rate Rock Slope Hazards	ENVIRONMENTAL & ENGINEERING GEOSCIENCE	1078-7275	1558-9161		MAY	2018	24	2	237	250		10.2113/EEG-1922	WOS:000450315600007
J	Li, DS; Lu, M	Li, Duanshun; Lu, Ming	Integrating geometric models, site images and GIS based on Google Earth and Keyhole Markup Language	AUTOMATION IN CONSTRUCTION	0926-5805	1872-7891		MAY	2018	89		317	331		10.1016/j.autcon.2018.02.002	WOS:000430777700027
J	Chen, XQ; Li, ZB; Wang, YH; Tang, JJ; Zhu, WB; Shi, CJ; Wu, HF	Chen, Xinqiang; Li, Zhibin; Wang, Yinhai; Tang, Jinjun; Zhu, Wenbo; Shi, Chaojian; Wu, Huafeng	Anomaly Detection and Cleaning of Highway Elevation Data from Google Earth Using Ensemble Empirical Mode Decomposition	JOURNAL OF TRANSPORTATION ENGINEERING PART A-SYSTEMS	2473-2907	2473-2893		MAY	2018	144	5			4018015	10.1061/JTEPBS.0000138	WOS:000427966500004
J	Huang, M; Chen, NC; Du, WY; Chen, ZQ; Gong, JY	Huang, Min; Chen, Nengcheng; Du, Wenying; Chen, Zeqiang; Gong, Jianya	DMBLC: An Indirect Urban Impervious Surface Area Extraction Approach by Detecting and Masking Background Land Cover on Google Earth Image	REMOTE SENSING	2072-4292			MAY	2018	10	5			766	10.3390/rs10050766	WOS:000435198400108
J	Bitting, KS; McCartney, MJ; Denning, KR; Roberts, JA	Bitting, Kelsey S.; McCartney, Marsha J.; Denning, Kathy R.; Roberts, Jennifer A.	Conceptual Learning Outcomes of Virtual Experiential Learning: Results of Google Earth Exploration in Introductory Geoscience Courses	RESEARCH IN SCIENCE EDUCATION	0157-244X	1573-1898		JUN	2018	48	3	533	548		10.1007/s11165-016-9577-z	WOS:000433208100002
J	Ziaul, S; Pal, S	Ziaul, Sk.; Pal, Swades	Analyzing control of respiratory particulate matter on Land Surface Temperature in local climatic zones of English Bazar Municipality and Surroundings	URBAN CLIMATE	2212-0955			JUN	2018	24		34	50		10.1016/j.uclim.2018.01.006	WOS:000433190000004
J	Chen, AA; Wang, NL; Guo, ZM; Wu, YW; Wu, HB	Chen, An-an; Wang, Ning-lian; Guo, Zhong-ming; Wu, Yu-wei; Wu, Hong-bo	Glacier variations and rising temperature in the Mt. Kenya since the Last Glacial Maximum	JOURNAL OF MOUNTAIN SCIENCE	1672-6316	1993-0321		JUN	2018	15	6	1268	1282		10.1007/s11629-017-4600-z	WOS:000435362700009
J	Ebrahimzadeh, S; Motagh, M; Mahboub, V; Harijani, FM	Ebrahimzadeh, Somayeh; Motagh, Mahdi; Mahboub, Vahid; Harijani, Farshad Mirdar	An improved RUSLE/SDR model for the evaluation of soil erosion	ENVIRONMENTAL EARTH SCIENCES	1866-6280	1866-6299		JUN	2018	77	12			454	10.1007/s12665-018-7635-8	WOS:000436366700001
J	Lee, J	Lee, Jacqueline	Modeling the connections between internally and externally drained basins using GIS, Google Earth (c), and remote sensing	PROGRESS IN PHYSICAL GEOGRAPHY-EARTH AND ENVIRONMENT	0309-1333	1477-0296		JUN	2018	42	3	274	304		10.1177/0309133318776462	WOS:000436066200002
J	Zhou, Y; Zhao, F; Wang, SX; Liu, WL; Wang, LT	Zhou, Yi; Zhao, Fei; Wang, Shixin; Liu, Wenliang; Wang, Litao	A Method for Monitoring Iron and Steel Factory Economic Activity Based on Satellites	SUSTAINABILITY	2071-1050			JUN	2018	10	6			1935	10.3390/su10061935	WOS:000436570100247
J	Narayanan, NC; Ray, I; Gopakumar, G; Argade, P	Narayanan, N. C.; Ray, Isha; Gopakumar, Govind; Argade, Poonam	Towards sustainable urban sanitation: a capacity-building approach to wastewater mapping for small towns in India	JOURNAL OF WATER SANITATION AND HYGIENE FOR DEVELOPMENT	2043-9083			JUN	2018	8	2	227	237		10.2166/washdev.2017.071	WOS:000453272500008
J	Plasencia-Lozano, P	Plasencia-Lozano, Pedro	An approach to determine the frequency of bridges in an urban context: The case of European cities	ENVIRONMENT AND PLANNING B-URBAN ANALYTICS AND CITY SCIENCE	2399-8083	2399-8091		JUL	2018	45	4	649	668		10.1177/0265813516677291	WOS:000434995600007
J	Mutenure, M; Cucek, L; Egieya, J; Isafiade, AJ; Kravanja, Z	Mutenure, Mildred; Cucek, Lidija; Egieya, Jafaru; Isafiade, Adeniyi J.; Kravanja, Zdravko	Optimization of bioethanol and sugar supply chain network: a South African case study	CLEAN TECHNOLOGIES AND ENVIRONMENTAL POLICY	1618-954X	1618-9558		JUL	2018	20	5	925	948		10.1007/s10098-018-1535-1	WOS:000435404400003
J	Wang, CY; Middel, A; Myint, SW; Kaplan, S; Brazel, AJ; Lukasczyk, J	Wang, Chuyuan; Middel, Ariane; Myint, Soe W.; Kaplan, Shai; Brazel, Anthony J.; Lukasczyk, Jonas	Assessing local climate zones in arid cities: The case of Phoenix, Arizona and Las Vegas, Nevada	ISPRS JOURNAL OF PHOTOGRAMMETRY AND REMOTE SENSING	0924-2716	1872-8235		JUL	2018	141		59	71		10.1016/j.isprsjprs.2018.04.009	WOS:000436911700005
J	Ali, MZ; Qazi, W; Aslam, N	Ali, Muhammad Zeeshan; Qazi, Waqas; Aslam, Nasir	A comparative study of ALOS-2 PALSAR and landsat-8 imagery for land cover classification using maximum likelihood classifier	EGYPTIAN JOURNAL OF REMOTE SENSING AND SPACE SCIENCES	1110-9823	2090-2476		JUL	2018	21		S29	S35		10.1016/j.ejrs.2018.03.003	WOS:000437841400005
J	Kataoka, T; Murray, CC; Isobe, A	Kataoka, Tomoya; Murray, Cathryn Clarke; Isobe, Atsuhiko	Quantification of marine macro-debris abundance around Vancouver Island, Canada, based on archived aerial photographs processed by projective transformation	MARINE POLLUTION BULLETIN	0025-326X	1879-3363		JUL	2018	132		44	51		10.1016/j.marpolbul.2017.08.060	WOS:000440117100005	28916350
J	Chaudhary, S; Wang, YK; Khanal, NR; Xu, P; Fu, B; Dixit, AM; Yan, K; Liu, Q; Lu, YF	Chaudhary, Suresh; Wang, Yukuan; Khanal, Narendra Raj; Xu, Pei; Fu, Bin; Dixit, Amod Mani; Yan, Kun; Liu, Qin; Lu, Yafeng	Social Impact of Farmland Abandonment and Its Eco-Environmental Vulnerability in the High Mountain Region of Nepal: A Case Study of Dordi River Basin	SUSTAINABILITY		2071-1050		JUL	2018	10	7			2331	10.3390/su10072331	WOS:000440947600222
J	Guyassa, E; Frankl, A; Zenebe, A; Poesen, J; Nyssen, J	Guyassa, Etefa; Frankl, Amaury; Zenebe, Amanuel; Poesen, Jean; Nyssen, Jan	Gully and soil and water conservation structure densities in semi-arid northern Ethiopia over the last 80years	EARTH SURFACE PROCESSES AND LANDFORMS	0197-9337	1096-9837		JUL	2018	43	9	1848	1859		10.1002/esp.4360	WOS:000437831300009
J	Twardzik, E; Antonakos, C; Baiers, R; Dubowitz, T; Clarke, P; Colabianchi, N	Twardzik, Erica; Antonakos, Cathy; Baiers, Ross; Dubowitz, Tamara; Clarke, Philippa; Colabianchi, Natalie	Validity of environmental audits using GigaPan (R) and Google Earth Technology	INTERNATIONAL JOURNAL OF HEALTH GEOGRAPHICS	1476-072X			JUL 6	2018	17				26	10.1186/s12942-018-0147-7	WOS:000437804700001	29980207
J	Ran, ZZ; Liu, GN	Ran, Zeze; Liu, Gengnian	Rock glaciers in Daxue Shan, south-eastern Tibetan Plateau: an inventory, their distribution, and their environmental controls	CRYOSPHERE	1994-0416	1994-0424		JUL 16	2018	12	7	2327	2340		10.5194/tc-12-2327-2018	WOS:000438762900001
J	Tieu, HV; Laeyendecker, O; Nandi, V; Rose, R; Fernandez, R; Lynch, B; Hoover, DR; Frye, V; Koblin, BA	Hong-Van Tieu; Laeyendecker, Oliver; Nandi, Vijay; Rose, Rebecca; Fernandez, Reinaldo; Lynch, Briana; Hoover, Donald R.; Frye, Victoria; Koblin, Beryl A.	Prevalence and mapping of hepatitis C infections among men who have sex with men in New York City	PLOS ONE	1932-6203			JUL 18	2018	13	7			e0200269	10.1371/journal.pone.0200269	WOS:000439022400043	30020960
J	Charbonneau, AA; Smith, DJ	Charbonneau, Ansley A.; Smith, Dan J.	An inventory of rock glaciers in the central British Columbia Coast Mountains, Canada, from high resolution Google Earth imagery	ARCTIC ANTARCTIC AND ALPINE RESEARCH	1523-0430	1938-4246		JUL 24	2018	50	1			UNSP e1489026	10.1080/15230430.2018.1489026	WOS:000440275100001
J	Poole, AC; McCutcheon, JC; Toohy, K; Burraston, B	Poole, Aaron C.; McCutcheon, James C.; Toohy, Kayla; Burraston, Bert	Testing the Impact of Road Network Connectivity on Criminal Lethality	HOMICIDE STUDIES	1088-7679	1552-6720		AUG	2018	22	3	277	295		10.1177/1088767918754307	WOS:000438067200003
J	Qi, F; Musonda, BM; Shen, HF; Wang, Y	Qi, Feng; Musonda, Brian Mutale; Shen, Huifang; Wang, Yi	Geometric classification method of rural residences at regional scale	ENERGY AND BUILDINGS	0378-7788	1872-6178		AUG 1	2018	172		170	180		10.1016/j.enbuild.2018.04.059	WOS:000438181100016
J	Singh, Y; Ul Haq, A; Bhat, GM; Pandita, SK; Singh, A; Sangra, R; Hussain, G; Kotwal, SS	Singh, Yudhbir; Ul Haq, Ahsan; Bhat, G. M.; Pandita, S. K.; Singh, Arjun; Sangra, Rameshwar; Hussain, Gulzar; Kotwal, S. S.	Rainfall-induced landslide in the active frontal fold-thrust belt of Northwestern Himalaya, Jammu: dynamics inferred by geological evidences and Ground Penetrating Radar	ENVIRONMENTAL EARTH SCIENCES	1866-6280	1866-6299		AUG	2018	77	16			592	10.1007/s12665-018-7772-0	WOS:000442805900003
J	Wang, Y; Zhang, JX; Liu, D; Yang, WJ; Zhang, WL	Wang, Yu; Zhang, Jingxiong; Liu, Di; Yang, Wenjing; Zhang, Wangle	Accuracy Assessment of GlobeLand30 2010 Land Cover over China Based on Geographically and Categorically Stratified Validation Sample Data	REMOTE SENSING	2072-4292			AUG	2018	10	8			1213	10.3390/rs10081213	WOS:000443618100049
J	Devi, MM; Geethanjali, M; Devi, AR	Devi, M. Meenakshi; Geethanjali, M.; Devi, A. Rama	Fault localization for transmission lines with optimal Phasor Measurement Units	COMPUTERS & ELECTRICAL ENGINEERING	0045-7906	1879-0755		AUG	2018	70		163	178		10.1016/j.compeleceng.2018.01.043	WOS:000446151100014
J	Liu, K; Ding, H; Tang, GA; Song, CQ; Liu, YW; Jiang, L; Zhao, BY; Gao, YF; Ma, RH	Liu, Kai; Ding, Hu; Tang, Guoan; Song, Chunqiao; Liu, Yiwen; Jiang, Ling; Zhao, Bangyuan; Gao, Yunfei; Ma, Ronghua	Large-scale mapping of gully-affected areas: An approach integrating Google Earth images and terrain skeleton information	GEOMORPHOLOGY	0169-555X	1872-695X		AUG 1	2018	314		13	26		10.1016/j.geomorph.2018.04.011	WOS:000434750000002
J	Zhang, YH; Foody, GM; Ling, F; Li, XD; Ge, Y; Du, Y; Atkinson, PM	Zhang, Yihang; Foody, Giles M.; Ling, Feng; Li, Xiaodong; Ge, Yong; Du, Yun; Atkinson, Peter M.	Spatial-temporal fraction map fusion with multi-scale remotely sensed images	REMOTE SENSING OF ENVIRONMENT	0034-4257	1879-0704		AUG	2018	213		162	181		10.1016/j.rse.2018.05.010	WOS:000437383600012
J	Dittmayer, C; Volcker, E; Wacker, I; Schroder, RR; Bachmann, S	Dittmayer, Carsten; Voelcker, Eckhard; Wacker, Irene; Schroeder, Rasmus R.; Bachmann, Sebastian	Modern field emission scanning electron microscopy provides new perspectives for imaging kidney ultrastructure	KIDNEY INTERNATIONAL	0085-2538	1523-1755		SEP	2018	94	3	625	631		10.1016/j.kint.2018.05.017	WOS:000442396400025	30143069
J	Izmailova, AV	Izmailova, A. V.	Lake Water Resources in the Asian Part of the Russian Federation	WATER RESOURCES	0097-8078	1608-344X		SEP	2018	45	5	633	641		10.1134/S0097807818050093	WOS:000443734800001
J	Asubonteng, K; Pfeffer, K; Ros-Tonen, M; Verbesselt, J; Baud, I	Asubonteng, Kwabena; Pfeffer, Karin; Ros-Tonen, Mirjam; Verbesselt, Jan; Baud, Isa	Effects of Tree-crop Farming on Land-cover Transitions in a Mosaic Landscape in the Eastern Region of Ghana	ENVIRONMENTAL MANAGEMENT	0364-152X	1432-1009		SEP	2018	62	3	529	547		10.1007/s00267-018-1060-3	WOS:000443834900009	29752495
J	Shimizu, K; Ota, T; Mizoue, N; Yoshida, S	Shimizu, Katsuto; Ota, Tetsuji; Mizoue, Nobuya; Yoshida, Shigejiro	Patch-Based Assessments of Shifting Cultivation Detected by Landsat Time Series Images in Myanmar	SUSTAINABILITY		2071-1050		SEP	2018	10	9			3350	10.3390/su10093350	WOS:000446770200393
J	Chang, LC; Amin, MZM; Yang, SN; Chang, FJ	Chang, Li-Chiu; Amin, Mohd Zaki M.; Yang, Shun-Nien; Chang, Fi-John	Building ANN-Based Regional Multi-Step-Ahead Flood Inundation Forecast Models	WATER		2073-4441		SEP	2018	10	9			1283	10.3390/w10091283	WOS:000448821900175
J	Arabameri, A; Rezaei, K; Pourghasemi, HR; Lee, S; Yamani, M	Arabameri, Alireza; Rezaei, Khalil; Pourghasemi, Hamid Reza; Lee, Saro; Yamani, Mojtaba	GIS-based gully erosion susceptibility mapping: a comparison among three data-driven models and AHP knowledge-based technique	ENVIRONMENTAL EARTH SCIENCES	1866-6280	1866-6299		SEP	2018	77	17			628	10.1007/s12665-018-7808-5	WOS:000444266300002
J	Meliho, M; Khattabi, A; Mhammdi, N	Meliho, Modeste; Khattabi, Abdellatif; Mhammdi, Nadia	A GIS-based approach for gully erosion susceptibility modelling using bivariate statistics methods in the Ourika watershed, Morocco	ENVIRONMENTAL EARTH SCIENCES	1866-6280	1866-6299		SEP	2018	77	18			655	10.1007/s12665-018-7844-1	WOS:000445081500002
J	Mir, RA; Jain, SK; Lohani, AK; Saraf, AK	Mir, Riyaz Ahmad; Jain, Sanjay K.; Lohani, A. K.; Saraf, Arun K.	Glacier recession and glacial lake outburst flood studies in Zanskar basin, western Himalaya	JOURNAL OF HYDROLOGY	0022-1694	1879-2707		SEP	2018	564		376	396		10.1016/j.jhydrol.2018.05.031	WOS:000445316200031
J	Xu, YY; Xie, Z; Feng, YX; Chen, ZL	Xu, Yongyang; Xie, Zhong; Feng, Yaxing; Chen, Zhanlong	Road Extraction from High-Resolution Remote Sensing Imagery Using Deep Learning	REMOTE SENSING		2072-4292		SEP	2018	10	9			1461	10.3390/rs10091461	WOS:000449993800141
J	Duy, DV; Tanaka, H; Mitobe, Y; Anh, NQD; Viet, NT	Duy, Dinh V.; Tanaka, Hitoshi; Mitobe, Yuta; Anh, Nguyen Q. D.; Viet, Nguyen T.	Sand Spit Elongation and Sediment Balance at Cua Lo Inlet in Central Vietnam	JOURNAL OF COASTAL RESEARCH	0749-0208	1551-5036		FAL	2018			32	39		10.2112/SI81-005.1	WOS:000457252000006
J	Yamagishi, Y; Nakanishi, A; Miura, S; Kodaira, S; Sakaguchi, H	Yamagishi, Yasuko; Nakanishi, Ayako; Miura, Seiichi; Kodaira, Shuichi; Sakaguchi, Hide	Development of a database and visualization system integrating various models of seismic velocity structure and subducting plate geometry around Japan	PROGRESS IN EARTH AND PLANETARY SCIENCE	2197-4284			SEP 5	2018	5				49	10.1186/s40645-018-0207-4	WOS:000443919400002
J	Wang, X; Hu, RM; Wang, ZY; Xiao, J	Wang, Xu; Hu, Ruimin; Wang, Zhongyuan; Xiao, Jing	Virtual Background Reference Frame Based Satellite Video Coding	IEEE SIGNAL PROCESSING LETTERS	1070-9908	1558-2361		OCT	2018	25	10	1445	1449		10.1109/LSP.2018.2862145	WOS:000442343100003
J	Grenke, J; Cahill, JF; Bork, EW	Grenke, Jessica; Cahill Jr, James F.; Bork, Edward W.	Quantification of Multi-Use Trail Effects Using a Rangeland Health Monitoring Approach and Google Earth	NATURAL AREAS JOURNAL	0885-8608	2162-4399		OCT	2018	38	5	370	379		10.3375/043.038.0506	WOS:000448222200005
J	Wang, C; Jia, MM; Chen, NC; Wang, W	Wang, Chao; Jia, Mingming; Chen, Nengcheng; Wang, Wei	Long-Term Surface Water Dynamics Analysis Based on Landsat Imagery and the Google Earth Engine Platform: A Case Study in the Middle Yangtze River Basin	REMOTE SENSING		2072-4292		OCT	2018	10	10			1635	10.3390/rs10101635	WOS:000448555800135
J	Broeckx, J; Vanmaercke, M; Duchateau, R; Poesen, J	Broeckx, Jente; Vanmaercke, Matthias; Duchateau, Rica; Poesen, Jean	A data-based landslide susceptibility map of Africa	EARTH-SCIENCE REVIEWS	0012-8252	1872-6828		OCT	2018	185		102	121		10.1016/j.earscirev.2018.05.002	WOS:000448493500006
J	Etefa, G; Frankl, A; Lanckriet, S; Biadgilgn, D; Gebreyohannes, Z; Amanuel, Z; Poesen, J; Nyssen, J	Etefa, Guyassa; Frankl, Amaury; Lanckriet, Sil; Biadgilgn, Demissie; Gebreyohannes, Zenebe; Amanuel, Zenebe; Poesen, Jean; Nyssen, Jan	Changes in land use/cover mapped over 80 years in the Highlands of Northern Ethiopia	JOURNAL OF GEOGRAPHICAL SCIENCES	1009-637X	1861-9568		OCT	2018	28	10	1538	1563		10.1007/s11442-018-1560-3	WOS:000442748400011
J	Mendenhall, CD; Wrona, AM	Mendenhall, Chase D.; Wrona, Anna M.	Improving tree cover estimates for fine-scale landscape ecology	LANDSCAPE ECOLOGY	0921-2973	1572-9761		OCT	2018	33	10	1691	1696		10.1007/s10980-018-0704-2	WOS:000445244500005
J	Yu, L; Xu, YD; Xue, YM; Li, XC; Cheng, YQ; Liu, XX; Porwal, A; Holden, EJ; Yang, J; Gong, P	Yu, Le; Xu, Yidi; Xue, Yueming; Li, Xuecao; Cheng, Yuqi; Liu, Xiaoxuan; Porwal, Alok; Holden, Eun-Jung; Yang, Jian; Gong, Peng	Monitoring surface mining belts using multiple remote sensing datasets: A global perspective	ORE GEOLOGY REVIEWS	0169-1368	1872-7360		OCT	2018	101		675	687		10.1016/j.oregeorev.2018.08.019	WOS:000448092400036
J	Li, ZW; Gao, P; You, YC	Li, Zhiwei; Gao, Peng; You, Yuchi	Characterizing Hydrological Connectivity of Artificial Ditches in Zoige Peatlands of Qinghai-Tibet Plateau	WATER	2073-4441			OCT	2018	10	10			1364	10.3390/w10101364	WOS:000451208400079
J	Singh, V; Goyal, MK	Singh, Vishal; Goyal, Manish Kumar	An improved coupled framework for Glacier classification: an integration of optical and thermal infrared remote-sensing bands	INTERNATIONAL JOURNAL OF REMOTE SENSING	0143-1161	1366-5901		OCT 18	2018	39	20	6864	6892		10.1080/01431161.2018.1468104	WOS:000450862400021
J	Juan-Llacer, L; Rodriguez, JV; Molina-Garcia-Pardo, JM; Pascual-Garcia, J; Martinez-Ingles, M	Juan-Llacer, Leandro; Rodriguez, Jose-Victor; Molina-Garcia-Pardo, Jose-Maria; Pascual-Garcia, Juan; Martinez-Ingles, Mayte	RadioEarth: An educational software tool based on Google Earth for radioelectric coverage analysis	COMPUTER APPLICATIONS IN ENGINEERING EDUCATION	1061-3773	1099-0542		NOV	2018	26	6	2141	2156		10.1002/cae.22016	WOS:000450361800017
J	Herman, L; Jurik, V; Stachon, Z; Vrbik, D; Russnak, J; Reznik, T	Herman, Lukas; Jurik, Vojtech; Stachon, Zdenek; Vrbik, Daniel; Russnak, Jan; Reznik, Tomas	Evaluation of User Performance in Interactive and Static 3D Maps	ISPRS INTERNATIONAL JOURNAL OF GEO-INFORMATION		2220-9964		NOV	2018	7	11			415	10.3390/ijgi7110415	WOS:000451313900002
J	Arabameri, A; Pradhan, B; Rezaei, K; Yamani, M; Pourghasemi, HR; Lombardo, L	Arabameri, Alireza; Pradhan, Biswajeet; Rezaei, Khalil; Yamani, Mojtaba; Pourghasemi, Hamid Reza; Lombardo, Luigi	Spatial modelling of gully erosion using evidential belief function, logistic regression, and a new ensemble of evidential belief function-logistic regression algorithm	LAND DEGRADATION & DEVELOPMENT	1085-3278	1099-145X		NOV	2018	29	11	4035	4049		10.1002/ldr.3151	WOS:000449541200019
J	Lasaponara, R; Masini, N	Lasaponara, Rosa; Masini, Nicola	Space-Based Identification of Archaeological Illegal Excavations and a New Automatic Method for Looting Feature Extraction in Desert Areas	SURVEYS IN GEOPHYSICS	0169-3298	1573-0956		NOV	2018	39	6	1323	1346		10.1007/s10712-018-9480-4	WOS:000447982800016
J	Rahman, KMA; Zhang, DF	Rahman, K. M. Atikur; Zhang, Dunfu	Analyzing the Level of Accessibility of Public Urban Green Spaces to Different Socially Vulnerable Groups of People	SUSTAINABILITY	2071-1050			NOV	2018	10	11			3917	10.3390/su10113917	WOS:000451531700091
J	Warnasuriya, TWS; Gunaalan, K; Gunasekara, SS	Warnasuriya, T. W. S.; Gunaalan, Kuddithamby; Gunasekara, S. S.	Google Earth: A New Resource for Shoreline Change Estimation-Case Study from Jaffna Peninsula, Sri Lanka	MARINE GEODESY	0149-0419	1521-060X		NOV 2	2018	41	6	546	580		10.1080/01490419.2018.1509160	WOS:000456827900002
J	Song, CY; Nigatu, L; Beneye, Y; Abdulahi, A; Zhang, L; Wu, DX	Song, Chuangye; Nigatu, Lisanework; Beneye, Yibrah; Abdulahi, Abdurezak; Zhang, Lin; Wu, Dongxiu	Mapping the vegetation of the Lake Tana basin, Ethiopia, using Google Earth images	EARTH SYSTEM SCIENCE DATA	1866-3508	1866-3516		NOV 15	2018	10	4	2033	2041		10.5194/essd-10-2033-2018	WOS:000450180600001
J	Garosi, Y; Sheklabadi, M; Pourghasemi, HR; Besalatpour, AA; Conoscenti, C; Van Oost, K	Garosi, Younes; Sheklabadi, Mohsen; Pourghasemi, Hamid Reza; Besalatpour, Ali Asghar; Conoscenti, Christian; Van Oost, Kristof	Comparison of differences in resolution and sources of controlling factors for gully erosion susceptibility mapping	GEODERMA	0016-7061	1872-6259		NOV 15	2018	330		65	78		10.1016/j.geoderma.2018.05.027	WOS:000438324600007
J	Ratanakorn, P; Suwanpakdee, S; Wiriyarat, W; Eiamampai, K; Chaichoune, K; Wiratsudakul, A; Sariya, L; Puthavathana, P	Ratanakorn, Parntep; Suwanpakdee, Sarin; Wiriyarat, Witthawat; Eiamampai, Krairat; Chaichoune, Kridsada; Wiratsudakul, Anuwat; Sariya, Ladawan; Puthavathana, Pilaipan	Satellite telemetry tracks flyways of Asian Openbill storks in relation to H5N1 avian influenza spread and ecological change	BMC VETERINARY RESEARCH	1746-6148			NOV 16	2018	14					10.1186/s12917-018-1683-x	WOS:000450511500003	30445946
J	Zhang, LL; Feng, H; Dong, QG; Jin, N; Zhang, TL	Zhang, Lingling; Feng, Hao; Dong, Qin'ge; Jin, Ning; Zhang, Tinglong	Mapping irrigated and rainfed wheat areas using high spatial-temporal resolution data generated by Moderate Resolution Imaging Spectroradiometer and Landsat	JOURNAL OF APPLIED REMOTE SENSING	1931-3195			NOV 27	2018	12	4			46023	10.1117/1.JRS.12.046023	WOS:000451817000001
J	Codilean, AT; Munack, H; Cohen, TJ; Saktura, WM; Gray, A; Mudd, SM	Codilean, Alexandru T.; Munack, Henry; Cohen, Timothy J.; Saktura, Wanchese M.; Gray, Andrew; Mudd, Simon M.	OCTOPUS: an open cosmogenic isotope and luminescence database	EARTH SYSTEM SCIENCE DATA	1866-3508	1866-3516		NOV 30	2018	10	4	2123	2139		10.5194/essd-10-2123-2018	WOS:000451735000001
J	Mandal, B; Mandal, S	Mandal, Biplab; Mandal, Sujit	Analytical hierarchy process (AHP) based landslide susceptibility mapping of Lish river basin of eastern Darjeeling Himalaya, India	ADVANCES IN SPACE RESEARCH	0273-1177	1879-1948		DEC 1	2018	62	11	3114	3132		10.1016/j.asr.2018.08.008	WOS:000452581600012
J	Dong, M; Yan, P; Liu, BL; Wu, W; Meng, XN; Ji, XR; Wang, Y; Wang, YJ	Dong, Miao; Yan, Ping; Liu, Baoli; Wu, Wei; Meng, Xiaonan; Ji, Xinran; Wang, Yong; Wang, Yijiao	Distribution patterns and morphological classification of climbing dunes in the Qinghai-Tibet Plateau	AEOLIAN RESEARCH	1875-9637	2212-1684		DEC	2018	35		58	68		10.1016/j.aeolia.2018.09.002	WOS:000452577700007
J	Keramidas, I; Dimarchopoulou, D; Pardalou, A; Tsikliras, AC	Keramidas, Ioannis; Dimarchopoulou, Donna; Pardalou, Androniki; Tsikliras, Athanassios C.	Estimating recreational fishing fleet using satellite data in the Aegean and Ionian Seas (Mediterranean Sea)	FISHERIES RESEARCH	0165-7836	1872-6763		DEC	2018	208		1	6		10.1016/j.fishres.2018.07.001	WOS:000447108300001
J	Li, QP; Mou, LC; Liu, QJ; Wang, YH; Zhu, XX	Li, Qingpeng; Mou, Lichao; Liu, Qingjie; Wang, Yunhong; Zhu, Xiao Xiang	HSF-Net: Multiscale Deep Feature Embedding for Ship Detection in Optical Remote Sensing Imagery	IEEE TRANSACTIONS ON GEOSCIENCE AND REMOTE SENSING	0196-2892	1558-0644		DEC	2018	56	12	7147	7161		10.1109/TGRS.2018.2848901	WOS:000451621000023
J	Gage, R; Wilson, N; Signal, L; Barr, M; Mackay, C; Reeder, A; Thomson, G	Gage, R.; Wilson, N.; Signal, L.; Barr, M.; Mackay, C.; Reeder, A.; Thomson, G.	Using Google Earth to Assess Shade for Sun Protection in Urban Recreation Spaces: Methods and Results	JOURNAL OF COMMUNITY HEALTH	0094-5145	1573-3610		DEC	2018	43	6	1061	1068		10.1007/s10900-018-0522-0	WOS:000450787000006	29770946
J	Mondal, S; Jeganathan, C	Mondal, Saptarshi; Jeganathan, Chockalingam	Evaluating the Performance of Multi-Class and Single-Class Classification Approaches for Mountain Agriculture Extraction Using Time-Series NDVI	JOURNAL OF THE INDIAN SOCIETY OF REMOTE SENSING	0255-660X	0974-3006		DEC	2018	46	12	2045	2055		10.1007/s12524-018-0852-5	WOS:000452725400012
J	Woldeamanual, W; Asfaw, Z; Lemessa, D	Woldeamanual, Weletehana; Asfaw, Zebene; Lemessa, Debissa	The Effect of the Surrounding Landscape and Socioeconomic characteristics on Woody Species Diversity in Homegardens of Shewarobit District, Northeast Ethiopia	SMALL-SCALE FORESTRY	1873-7617	1873-7854		DEC	2018	17	4	471	483		10.1007/s11842-018-9398-1	WOS:000451379200003
J	Sheikh, MAA; Kole, A; Maity, T	Sheikh, Md Abdul Alim; Kole, Alok; Maity, Tanmoy	A Multi-Level Approach for Change Detection of Buildings Using Satellite Imagery	INTERNATIONAL JOURNAL ON ARTIFICIAL INTELLIGENCE TOOLS	0218-2130	1793-6349		DEC	2018	27	8			1850031	10.1142/S0218213018500318	WOS:000454162000002
J	Aboushal, EA	Aboushal, E. A.	Applying GIS Technology for optimum selection of Photovoltaic Panels Spatially at Defined Urban Area in Alexandria, Egypt	ALEXANDRIA ENGINEERING JOURNAL	1110-0168	2090-2670		DEC	2018	57	4	4167	4176		10.1016/j.aej.2018.11.005	WOS:000454444200185
J	Pak, GD; Haselbeck, AH; Seo, HW; Osei, I; Amuasi, J; Breiman, RF; Espinosa, LMC; Holm, M; Im, J; Jang, GH; Jeon, HJ; Luby, SP; Lunguya-Metila, O; MacWright, W; Mogeni, OD; Okeke, IN; Owusu-Dabo, E; Park, JK; Park, SE; Popoola, O; Seo, HJ; Soura, AB; Teferi, M; Toy, T; Chon, Y; Rafindrakalia, M; Rakotozandrindrainy, R; Meyer, CG; Marks, F; Panzner, U	Pak, Gi Deok; Haselbeck, Andrea Haekyung; Seo, Hyeong Won; Osei, Isaac; Amuasi, John; Breiman, Robert F.; Espinosa, Ligia Maria Cruz; Holm, Marianne; Im, Justin; Jang, Geun Hyeog; Jeon, Hyon Jin; Luby, Stephen P.; Lunguya-Metila, Octavie; MacWright, William; Mogeni, Ondari Daniel; Okeke, Iruka N.; Owusu-Dabo, Ellis; Park, Jin Kyung; Park, Se Eun; Popoola, Oluwafemi; Seo, Hye Jin; Soura, Abdramane…	The HPAfrica protocol: Assessment of health behaviour and population-based socioeconomic, hygiene behavioural factors - a standardised repeated cross-sectional study in multiple cohorts in sub-Saharan Africa	BMJ OPEN	2044-6055			DEC	2018	8	12			e021438	10.1136/bmjopen-2017-021438	WOS:000455309300023	30573477
J	Ali, S; Li, BF	Ali, Salman; Li, Baofeng	Evaluating the Impact of the Morphological Transformation of Urban Sites on the Urban Thermal Microenvironment	BUILDINGS		2075-5309		DEC	2018	8	12			182	10.3390/buildings8120182	WOS:000455164500017
J	Alshibani, A	Alshibani, Adel	Automation of Measuring Actual Productivity of Earthwork in Urban Area, a Case Study from Montreal	BUILDINGS		2075-5309		DEC	2018	8	12			178	10.3390/buildings8120178	WOS:000455164500013
J	Kim, M; Lee, J; Han, D; Shin, M; Im, J; Lee, J; Quackenbush, LJ; Gu, Z	Kim, Miae; Lee, Junghee; Han, Daehyeon; Shin, Minso; Im, Jungho; Lee, Junghye; Quackenbush, Lindi J.; Gu, Zhu	Convolutional Neural Network-Based Land Cover Classification Using 2-D Spectral Reflectance Curve Graphs With Multitemporal Satellite Imagery	IEEE JOURNAL OF SELECTED TOPICS IN APPLIED EARTH OBSERVATIONS AND REMOTE SENSING	1939-1404	2151-1535		DEC	2018	11	12	4604	4617		10.1109/JSTARS.2018.2880783	WOS:000455462100006
J	Lesiv, M; See, L; Bayas, JCL; Sturn, T; Schepaschenko, D; Karner, M; Moorthy, I; McCallum, I; Fritz, S	Lesiv, Myroslava; See, Linda; Bayas, Juan Carlos Laso; Sturn, Tobias; Schepaschenko, Dmitry; Karner, Mathias; Moorthy, Inian; McCallum, Ian; Fritz, Steffen	Characterizing the Spatial and Temporal Availability of Very High Resolution Satellite Imagery in Google Earth and Microsoft Bing Maps as a Source of Reference Data	LAND		2073-445X		DEC	2018	7	4			118	10.3390/land7040118	WOS:000455415800007
J	Martinez-Grana, A; Gonzalez-Delgado, JA; Ramos, C; Gonzalo, JC	Martinez-Grana, Antonio; Angel Gonzalez-Delgado, Jose; Ramos, Celia; Carlos Gonzalo, Juan	Augmented Reality and Valorizing the Mesozoic Geological Heritage (Burgos, Spain)	SUSTAINABILITY		2071-1050		DEC	2018	10	12			4616	10.3390/su10124616	WOS:000455338100282
J	Xu, XF; Schreiber, DSP; Lu, Q; Zhang, Q	Xu, Xiaofan; Schreiber, Dylan S. P.; Lu, Qing; Zhang, Qiong	A GIS-Based Framework Creating Green Stormwater Infrastructure Inventory Relevant to Surface Transportation Planning	SUSTAINABILITY		2071-1050		DEC	2018	10	12			4710	10.3390/su10124710	WOS:000455338100376
J	Zhang, L; Jin, G; Wan, Q; Liu, YF; Wei, XJ	Zhang, Lei; Jin, Gui; Wan, Qing; Liu, Yanfang; Wei, Xiaojian	Measurement of Ecological Land Use/Cover Change and Its Varying Spatiotemporal Driving Forces by Statistical and Survival Analysis: A Case Study of Yingkou City, China	SUSTAINABILITY		2071-1050		DEC	2018	10	12			4567	10.3390/su10124567	WOS:000455338100233
J	Fu, K; Lu, WX; Diao, WH; Yan, ML; Sun, H; Zhang, Y; Sun, X	Fu, Kun; Lu, Wanxuan; Diao, Wenhui; Yan, Menglong; Sun, Hao; Zhang, Yi; Sun, Xian	WSF-NET: Weakly Supervised Feature-Fusion Network for Binary Segmentation in Remote Sensing Image	REMOTE SENSING		2072-4292		DEC	2018	10	12			1970	10.3390/rs10121970	WOS:000455637600112
J	Wang, Y; Monsere, CM; Chen, C; Wang, HZ	Wang, Yi; Monsere, Christopher M.; Chen, Chen; Wang, Haizhong	Development of a Crash Risk-Scoring Tool for Pedestrian and Bicycle Projects in Oregon	TRANSPORTATION RESEARCH RECORD	0361-1981	2169-4052		DEC	2018	2672	32	30	39		10.1177/0361198118794285	WOS:000468213900004
J	Ross, JC; Arnoldy, M; Evans, J	Ross, Jason C.; Arnoldy, Mark; Evans, Jonathan	New Hampshire Department of Transportation Statewide Noise Barrier Study	TRANSPORTATION RESEARCH RECORD	0361-1981	2169-4052		DEC	2018	2672	24	144	153		10.1177/0361198118797188	WOS:000468213000014
J	Lara-Valencia, F; Garcia-Perez, H	Lara-Valencia, Francisco; Garcia-Perez, Hilda	Disparities in the provision of public parks in neighbourhoods with varied Latino composition in the Phoenix Metropolitan Area	LOCAL ENVIRONMENT	1354-9839	1469-6711		DEC 2	2018	23	12	1107	1120		10.1080/13549839.2018.1528443	WOS:000450402500001
J	Chen, W; Panahi, M; Tsangaratos, P; Shahabi, H; Ilia, I; Panahi, S; Li, SJ; Jaafari, A; Bin Ahmad, B	Chen, Wei; Panahi, Mandi; Tsangaratos, Paraskevas; Shahabi, Himan; Ilia, Ioanna; Panahi, Somayeh; Li, Shaojun; Jaafari, Abolfazl; Bin Ahmad, Baharin	Applying population-based evolutionary algorithms and a neuro-fuzzy system for modeling landslide susceptibility	CATENA	0341-8162	1872-6887		JAN	2019	172		212	231		10.1016/j.catena.2018.08.025	WOS:000449136800022
J	Martinez-Grana, AM; Goy, JL; Gonzalez-Delgado, JA; Cruz, R; Sanz, J; Cimarra, C; de Bustamante, I	Martinez-Grana, Antonio Miguel; Goy, Jose Luis; Gonzalez-Delgado, Jose Angel; Cruz, Raquel; Sanz, Juana; Cimarra, Carmen; de Bustamante, Irene	3D Virtual Itinerary in the Geological Heritage from Natural Areas in Salamanca-Avila-Caceres, Spain	SUSTAINABILITY	2071-1050			JAN 1	2019	11	1			144	10.3390/su11010144	WOS:000457127300144
J	Barney, T	Barney, Timothy	The sight and site of North Korea: Citizen cartography's rhetoric of resolution in the satellite imagery of labor camps	QUARTERLY JOURNAL OF SPEECH	0033-5630	1479-5779			2019	105	1	1	24		10.1080/00335630.2018.1553306	WOS:000457614800001
J	Panuju, DR; Paull, DJ; Trisasongko, BH	Panuju, Dyah R.; Paull, David J.; Trisasongko, Bambang H.	Combining Binary and Post-Classification Change Analysis of Augmented ALOS Backscatter for Identifying Subtle Land Cover Changes	REMOTE SENSING		2072-4292		JAN 1	2019	11	1			100	10.3390/rs11010100	WOS:000457935600100
J	Zhang, WS; Pan, H; Song, CQ; Ke, LH; Wang, JD; Ma, RH; Deng, XY; Liu, K; Zhu, JY; Wu, QH	Zhang, Wensong; Pan, Hang; Song, Chunqiao; Ke, Linghong; Wang, Jida; Ma, Ronghua; Deng, Xinyuan; Liu, Kai; Zhu, Jingying; Wu, Qianhan	Identifying Emerging Reservoirs along Regulated Rivers Using Multi-Source Remote Sensing Observations	REMOTE SENSING		2072-4292		JAN 1	2019	11	1			25	10.3390/rs11010025	WOS:000457935600025
J	Hu, YP; Ren, FY; Ding, HX; Fu, Y; Tan, BH	Hu, Yingpeng; Ren, Fengyu; Ding, Hangxing; Fu, Yu; Tan, Baohui	Study on the Process and Mechanism of Slope Failure Induced by Mining under Open Pit Slope: A Case Study from Yanqianshan Iron Mine, China	ADVANCES IN CIVIL ENGINEERING	1687-8086	1687-8094			2019	2019				6862936	10.1155/2019/6862936	WOS:000461572100001
J	Xun, L; Wang, PX; Li, L; Wang, L; Kong, QL	Xun, Lan; Wang, Pengxin; Li, Li; Wang, Lei; Kong, Qingling	Identifying crop planting areas using Fourier-transformed feature of time series MODIS leaf area index and sparse-representation-based classification in the North China Plain	INTERNATIONAL JOURNAL OF REMOTE SENSING	0143-1161	1366-5901			2019	40	5-6	2034	2052		10.1080/01431161.2018.1492181	WOS:000464043900027
J	Useya, J; Chen, SB; Murefu, M	Useya, Juliana; Chen, Shengbo; Murefu, Mike	Cropland Mapping and Change Detection: Toward Zimbabwean Cropland Inventory	IEEE ACCESS	2169-3536				2019	7		53603	53620		10.1109/ACCESS.2019.2912807	WOS:000467031700001
J	He, MZ; Li, W; Juma, S; Kabole, A; Xu, DC; Wang, XY; He, J; Jiang, T; Bergquist, R; Yang, K	He, Ming-Zhen; Li, Wei; Juma, Saleh; Kabole, Atma; Xu, Da-Cheng; Wang, Xin-Yao; He, Jian; Jiang, Tao; Bergquist, Robert; Yang, Kun	A Google Earth-based database management for schistosomiasis control in Zanzibar	GEOSPATIAL HEALTH	1827-1987	1970-7096			2019	14	1	62	71	740	10.4081/gh.2019.740	WOS:000467821900008	31099516
J	Bui, DT; Shahabi, H; Mohammadi, A; Bin Ahmad, B; Bin Jamal, MH; Mohamed, RBN; Ahmadi, M; Shirzadi, A; Rahmani, H; Pham, BT; Ahmad, A	Tien Bui, D.; Shahabi, H.; Mohammadi, A.; Bin Ahmad, B.; Bin Jamal, M. H.; Mohamed, Noor R. B.; Ahmadi, M.; Shirzadi, A.; Rahmani, H.; Pham, B. T.; Ahmad, A.	LAND COVER CHANGE MAPPING USING A COMBINATION OF SENTINEL-1 DATA AND MULTISPECTRAL SATELLITE IMAGERY: A CASE STUDY OF SANANDAJ COUNTY, KURDISTAN, IRAN	APPLIED ECOLOGY AND ENVIRONMENTAL RESEARCH	1589-1623	1785-0037			2019	17	3	5449	5463		10.15666/aeer/1703_54495463	WOS:000469124600008
J	Manzanares, JA; Quintana, SM	Alcantara Manzanares, Jorge; Medina Quintana, Silvia	The use of Educational Itineraries (GIS) in Environmental Education	ENSENANZA DE LAS CIENCIAS	0212-4521	2174-6486			2019	37	2	173	188		10.5565/rev/ensciencias.2258	WOS:000471000600009
J	Abbasi, H; Opp, C; Groll, M; Gohardoust, A	Abbasi, Hamidreza; Opp, Christian; Groll, Micheal; Gohardoust, Azadeh	Wind regime and sand transport in the Sistan and Registan regions (Iran/Afghanistan)	ZEITSCHRIFT FUR GEOMORPHOLOGIE	0372-8854				2019	62		41	57		10.1127/zfg_suppl/2019/0543	WOS:000476620100003
J	Conser, E; Shanks, AL	Conser, Elena; Shanks, Alan L.	Density of benthic macroalgae in the intertidal zone varies with surf zone hydrodynamics	PHYCOLOGIA	0031-8884	2330-2968			2019	58	3	254	259		10.1080/00318884.2018.1557917	WOS:000482132300001
J	Aklibasinda, M	Aklibasinda, Meliha	DETERMINING THE ACTIVE GREEN AREAS AND THEIR ADEQUACY BY USING SATELLITE IMAGES AND GIS: THE CASE OF NEVSEHIR CITY (TURKEY)	FRESENIUS ENVIRONMENTAL BULLETIN	1018-4619	1610-2304			2019	28	10	7274	7281			WOS:000487347700032
J	Dai, W; Hu, GH; Huang, N; Zhang, P; Yang, X; Tang, GA	Dai, Wen; Hu, Guanghui; Huang, Nan; Zhang, Peng; Yang, Xin; Tang, Guoan	A Contour-Directional Detection for Deriving Terrace Ridge From Open Source Images and Digital Elevation Models	IEEE ACCESS	2169-3536				2019	7		129215	129224		10.1109/ACCESS.2019.2940437	WOS:000487233800087
J	Malik, NA; Shaikh, MA	Malik, Naeem A.; Shaikh, Masood A.	Spatial distribution and accessibility to public sector tertiary care teaching hospitals: case study from Pakistan	EASTERN MEDITERRANEAN HEALTH JOURNAL	1020-3397	1687-1634			2019	25	6	431	434		10.26719/emhj.18.049	WOS:000488973300008	31469163
J	Chavez-Villavicencio, C; Tabilo-Valdivieso, E; Jofre-Perez, C	Chavez-Villavicencio, Cesar; Tabilo-Valdivieso, Elier; Jofre-Perez, Christian	Tsunami effects on Coquimbo Bay wetland water-bird species composition, associated with the 2015 Mw8.4 Illapel earthquake (northern Chile)	LATIN AMERICAN JOURNAL OF AQUATIC RESEARCH	0718-560X	0717-7178			2019	47	5	845	852		10.3856/vol47-issue5-fulltext-14	WOS:000498693200014
J	Acharya, TD; Kim, KN; Lee, KY; Subedi, A; Huang, H; Lee, DH	Acharya, Tri Dev; Kim, Kyung Nam; Lee, Kwang Youn; Subedi, Anoj; Huang, He; Lee, Dong Ha	Decision-tree-based Mapping of Erosion-prone Areas in Hilly Regions of Kangwon Province, North Korea	SENSORS AND MATERIALS	0914-4935				2019	31	11	3899	3915		10.18494/SAM.2019.2707	WOS:000500243200015
J	Twumasi, NYD; Shao, Z; Altan, O	Twumasi, N. Y. D.; Shao, Z.; Altan, O.	MAPPING BUILT-UP AREAS USING TWO BAND RATIO ON LANDSAT IMAGERY OF ACCRA IN GHANA FROM 1980 TO 2017	APPLIED ECOLOGY AND ENVIRONMENTAL RESEARCH	1589-1623	1785-0037			2019	17	6	13147	13168		10.15666/aeer/1706_1314713168	WOS:000505251300034
J	Wen, Q; Jiang, KY; Wang, W; Liu, QJ; Guo, Q; Li, LL; Wang, P	Wen, Qi; Jiang, Kaiyu; Wang, Wei; Liu, Qingjie; Guo, Qing; Li, Lingling; Wang, Ping	Automatic Building Extraction from Google Earth Images under Complex Backgrounds Based on Deep Instance Segmentation Network	SENSORS		1424-8220		JAN 2	2019	19	2			333	10.3390/s19020333	WOS:000458569300116	30650645
J	Moity, N; Delgado, B; Salinas-de-Leon, P	Moity, Nicolas; Delgado, Byron; Salinas-de-Leon, Pelayo	Mangroves in the Galapagos islands: Distribution and dynamics	PLOS ONE	1932-6203			JAN 9	2019	14	1			e0209313	10.1371/journal.pone.0209313	WOS:000455359400034	30625180
J	Lv, MY; Guo, HD; Lu, XC; Liu, G; Yan, SY; Ruan, ZX; Ding, YX; Quincey, DJ	Lv, Mingyang; Guo, Huadong; Lu, Xiancai; Liu, Guang; Yan, Shiyong; Ruan, Zhixing; Ding, Yixing; Quincey, Duncan J.	Characterizing the behaviour of surge-and non-surge-type glaciers in the Kingata Mountains, eastern Pamir, from 1999 to 2016	CRYOSPHERE	1994-0416	1994-0424		JAN 24	2019	13	1	219	236		10.5194/tc-13-219-2019	WOS:000456716100001
J	Arroyo, I; Gine, F; Roig, C; Granollers, A	Arroyo, Ismael; Gine, Francesc; Roig, Concepcio; Granollers, Antoni	Performance and usability tradeoff in a cluster display wall	COMPUTER STANDARDS & INTERFACES	0920-5489	1872-7018		FEB	2019	62		53	63		10.1016/j.csi.2018.08.002	WOS:000452936400005
J	Kropacek, J	Kropacek, Jan	Erosion dynamics in the southern Tibetan Plateau at a century time scale from historical photographs	JOURNAL OF ARID ENVIRONMENTS	0140-1963	1095-922X		FEB	2019	161		47	54		10.1016/j.jaridenv.2018.10.005	WOS:000452936700005
J	Fehrmann, L; Kukunda, CB; Nolke, N; Schnell, S; Seidel, D; Magnussen, S; Kleinn, C	Fehrmann, Lutz; Kukunda, Collins B.; Noelke, Nils; Schnell, Sebastian; Seidel, Dominik; Magnussen, Steen; Kleinn, Christoph	A unified framework for land cover monitoring based on a discrete global sampling grid (GSG)	ENVIRONMENTAL MONITORING AND ASSESSMENT	0167-6369	1573-2959		FEB	2019	191	2			46	10.1007/s10661-018-7152-y	WOS:000454790100001	30604049
J	Zhong, RH; He, DM; Hu, JM; Duan, XW; Huang, JC; Cheng, XP	Zhong, Ronghua; He, Daming; Hu, Jinming; Duan, Xingwu; Huang, Jiangcheng; Cheng, Xupeng	Distribution and Susceptibility Assessment of Collapses and Landslides in the Riparian Zone of the Xiaowan Reservoir	CHINESE GEOGRAPHICAL SCIENCE	1002-0063	1993-064X		FEB	2019	29	1	70	85		10.1007/s11769-018-1012-0	WOS:000455227500006
J	Mahmood, S; Irshad, A; Nasir, JM; Sharif, F; Farooqi, SH	Mahmood, Shakeel; Irshad, Ahtisham; Nasir, Jan Mohammad; Sharif, Faiza; Farooqi, Shahid Hussain	Spatiotemporal analysis of dengue outbreaks in Samanabad town, Lahore metropolitan area, using geospatial techniques	ENVIRONMENTAL MONITORING AND ASSESSMENT	0167-6369	1573-2959		FEB	2019	191	2			55	10.1007/s10661-018-7162-9	WOS:000455116000004	30617862
J	Gao, C; Wang, SJ	Gao Chao; Wang Suiji	Evolution of the gravel-bedded anastomosing river within the Qihama reach of the First Great Bend of the Yellow River	JOURNAL OF GEOGRAPHICAL SCIENCES	1009-637X	1861-9568		FEB	2019	29	2	306	320		10.1007/s11442-019-1598-x	WOS:000455153300009
J	Austin, KG; Schwantes, A; Gu, YF; Kasibhatla, PS	Austin, Kemen G.; Schwantes, Amanda; Gu, Yaofeng; Kasibhatla, Prasad S.	What causes deforestation in Indonesia?	ENVIRONMENTAL RESEARCH LETTERS	1748-9326			FEB	2019	14	2			24007	10.1088/1748-9326/aaf6db	WOS:000457539400001
J	Mantelli, M; Pittol, D; Neuland, R; Ribacki, A; Maffei, R; Jorge, V; Prestes, E; Kolberg, M	Mantelli, Mathias; Pittol, Diego; Neuland, Renata; Ribacki, Arthur; Maffei, Renan; Jorge, Vitor; Prestes, Edson; Kolberg, Mariana	A novel measurement model based on abBRIEF for global localization of a UAV over satellite images	ROBOTICS AND AUTONOMOUS SYSTEMS	0921-8890	1872-793X		FEB	2019	112		304	319		10.1016/j.robot.2018.12.006	WOS:000457667300025
J	Prasad, KA; Ottinger, M; Wei, CZ; Leinenkugel, P	Prasad, Kumar Arun; Ottinger, Marco; Wei, Chunzhu; Leinenkugel, Patrick	Assessment of Coastal Aquaculture for India from Sentinel-1 SAR Time Series	REMOTE SENSING	2072-4292			FEB 1	2019	11	3			357	10.3390/rs11030357	WOS:000459944400145
J	Chen, PY	Chen, Pengyu	Visualization of real-time monitoring datagraphic of urban environmental quality	EURASIP JOURNAL ON IMAGE AND VIDEO PROCESSING	1687-5176	1687-5281		FEB 12	2019					42	10.1186/s13640-019-0443-6	WOS:000458760400001
J	Juliev, M; Mergili, M; Mondal, I; Nurtaev, B; Pulatov, A; Hubl, J	Juliev, Mukhiddin; Mergili, Martin; Mondal, Ismail; Nurtaev, Bakhtiar; Pulatov, Alim; Huebl, Johannes	Comparative analysis of statistical methods for landslide susceptibility mapping in the Bostanlik District, Uzbekistan	SCIENCE OF THE TOTAL ENVIRONMENT	0048-9697	1879-1026		FEB 25	2019	653		801	814		10.1016/j.scitotenv.2018.10.431	WOS:000458626800081	30759606
J	Luo, X; Tong, XH; Qian, Z; Pan, HY; Liu, SC	Luo, Xin; Tong, Xiaohua; Qian, Zhi; Pan, Haiyan; Liu, Sicong	Detecting urban ecological land-cover structure using remotely sensed imagery: A multi-area study focusing on metropolitan inner cities	INTERNATIONAL JOURNAL OF APPLIED EARTH OBSERVATION AND GEOINFORMATION	0303-2434			MAR	2019	75		106	117		10.1016/j.jag.2018.10.014	WOS:000452814800009
J	Liu, FL; Gao, HS; Pan, BT; Li, ZM; Su, H	Liu, Fenliang; Gao, Hongshan; Pan, Baotian; Li, Zongmeng; Su, Huai	Quantitative analysis of planation surfaces of the upper Yangtze River in the Sichuan-Yunnan Region, Southwest China	FRONTIERS OF EARTH SCIENCE	2095-0195	2095-0209		MAR	2019	13	1	55	74		10.1007/s11707-018-0707-y	WOS:000457401700005
J	Mushore, TD; Dube, T; Manjowe, M; Gumindoga, W; Chemura, A; Rousta, I; Odindi, J; Mutanga, O	Mushore, Terence Darlington; Dube, Timothy; Manjowe, Moven; Gumindoga, Wester; Chemura, Abel; Rousta, Iman; Odindi, John; Mutanga, Onisimo	Remotely sensed retrieval of Local Climate Zones and their linkages to land surface temperature in Harare metropolitan city, Zimbabwe	URBAN CLIMATE	2212-0955			MAR	2019	27		259	271		10.1016/j.uclim.2018.12.006	WOS:000458278400018
J	Shi, KF; Yang, QY; Li, YQ; Sun, XF	Shi, Kaifang; Yang, Qingyuan; Li, Yuanqing; Sun, Xiufeng	Mapping and evaluating cultivated land fallow in Southwest China using multisource data	SCIENCE OF THE TOTAL ENVIRONMENT	0048-9697	1879-1026		MAR 1	2019	654		987	999		10.1016/j.scitotenv.2018.11.172	WOS:000458630100090	30453268
J	Gul, M; Sahhoglu, R; Dincer, F; Darbs, G	Gul, Murat; Sahhoglu, Rana; Dincer, Feyza; Darbs, Guldemin	Coastal geology of Iztuzu Spit (Dalyan, Mugla, SW Turkey)	JOURNAL OF AFRICAN EARTH SCIENCES	1464-343X	1879-1956		MAR	2019	151		173	183		10.1016/j.jafrearsci.2018.12.017	WOS:000459841400015
J	Castro, J; Vallejo, LE; Estrada, N	Castro, Jaime; Vallejo, Luis E.; Estrada, Nicolas	The optimal design of the retaining walls built by the Incas in their agricultural terraces	JOURNAL OF CULTURAL HERITAGE	1296-2074	1778-3674		MAR-APR	2019	36		232	237		10.1016/j.culher.2018.09.013	WOS:000460311800024
J	Rabby, YW; Li, YK	Rabby, Yasin Wahid; Li, Yingkui	An integrated approach to map landslides in Chittagong Hilly Areas, Bangladesh, using Google Earth and field mapping	LANDSLIDES	1612-510X	1612-5118		MAR	2019	16	3	633	645		10.1007/s10346-018-1107-9	WOS:000461573100014
J	Mukherjee, J; Mukherjee, J; Chakravarty, D; Aikat, S	Mukherjee, Jit; Mukherjee, Jayanta; Chakravarty, Debashish; Aikat, Subhas	A Novel Index to Detect Opencast Coal Mine Areas From Landsat 8 OLI/TIRS	IEEE JOURNAL OF SELECTED TOPICS IN APPLIED EARTH OBSERVATIONS AND REMOTE SENSING	1939-1404	2151-1535		MAR	2019	12	3	891	897		10.1109/JSTARS.2019.2896842	WOS:000463025100010
J	Guo, YC; Song, W	Guo, Yuchen; Song, Wei	Spatial Distribution and Simulation of Cropland Abandonment in Wushan County, Chongqing, China	SUSTAINABILITY	2071-1050			MAR 1	2019	11	5			1367	10.3390/su11051367	WOS:000462661000151
J	Jiang, BT; Ma, XF; Lu, Y; Li, Y; Feng, L; Shi, ZW	Jiang, Bitao; Ma, Xiaofeng; Lu, Yao; Li, Yang; Feng, Li; Shi, Zhenwei	Ship detection in spaceborne infrared images based on Convolutional Neural Networks and synthetic targets	INFRARED PHYSICS & TECHNOLOGY	1350-4495	1879-0275		MAR	2019	97		229	234		10.1016/j.infrared.2018.12.040	WOS:000465060100033
J	Carvajal-Ramirez, F; Navarro-Ortega, AD; Aguera-Vega, F; Martinez-Carricondo, P; Mancini, F	Carvajal-Ramirez, Fernando; Navarro-Ortega, Ana D.; Aguera-Vega, Francisco; Martinez-Carricondo, Patricio; Mancini, Francesco	Virtual reconstruction of damaged archaeological sites based on Unmanned Aerial Vehicle Photogrammetry and 3D modelling. Study case of a southeastern Iberia production area in the Bronze Age	MEASUREMENT	0263-2241	1873-412X		MAR	2019	136		225	236		10.1016/j.measurement.2018.12.092	WOS:000469024100023
J	Shiferaw, D; Suryabhagavan, KV	Shiferaw, Dinku; Suryabhagavan, K., V	Forest degradation monitoring and assessment of biomass in Harenna Buluk District, Bale Zone, Ethiopia: a geospatial perspective	TROPICAL ECOLOGY	0564-3295	2661-8982		MAR	2019	60	1	94	104		10.1007/s42965-019-00012-5	WOS:000470336100010
J	Jain, SK; Mir, RA	Jain, Sanjay K.; Mir, Riyaz Ahmad	Glacier and glacial lake classification for change detection studies using satellite data: a case study from Baspa basin, western Himalaya	GEOCARTO INTERNATIONAL	1010-6049	1752-0762		MAR 21	2019	34	4	391	414		10.1080/10106049.2017.1404145	WOS:000467966700004
J	Awange, JL; Saleem, A; Sukhadiya, RM; Ouma, YO; Kexiang, H	Awange, J. L.; Saleem, A.; Sukhadiya, R. M.; Ouma, Y. O.; Kexiang, H.	Physical dynamics of Lake Victoria over the past 34 years (1984-2018): Is the lake dying?	SCIENCE OF THE TOTAL ENVIRONMENT	0048-9697	1879-1026		MAR 25	2019	658		199	218		10.1016/j.scitotenv.2018.12.051	WOS:000456175700022	30580208
J	Maity, DK; Mandal, S	Maity, Deb Kumar; Mandal, Sujit	Identification of groundwater potential zones of the Kumari river basin, India: an RS & GISbased semi-quantitative approach	ENVIRONMENT DEVELOPMENT AND SUSTAINABILITY	1387-585X	1573-2975		APR	2019	21	2	1013	1034		10.1007/s10668-017-0072-0	WOS:000462598700023
J	Li, ZW; Shen, HF; Cheng, Q; Liu, YH; You, SC; He, ZY	Li, Zhiwei; Shen, Huanfeng; Cheng, Qing; Liu, Yuhao; You, Shucheng; He, Zongyi	Deep learning based cloud detection for medium and high resolution remote sensing images of different sensors	ISPRS JOURNAL OF PHOTOGRAMMETRY AND REMOTE SENSING	0924-2716	1872-8235		APR	2019	150		197	212		10.1016/j.isprsjprs.2019.02.017	WOS:000464088400014
J	Bettinger, P; Merry, K	Bettinger, Pete; Merry, Krista	Land cover transitions in the United States South: 2007-2013	APPLIED GEOGRAPHY	0143-6228	1873-7730		APR	2019	105		102	110		10.1016/j.apgeog.2019.03.002	WOS:000464479200009
J	Song, L; Liu, SJ; Mao, YC; Wang, D; Yu, ML	Song Liang; Liu Shan-jun; Mao Ya-chun; Wang Dong; Yu Mo-li	A Classification Method Based on the Visible Spectrum for Burned and Unburned Gangue Distinguishment	SPECTROSCOPY AND SPECTRAL ANALYSIS	1000-0593			APR	2019	39	4	1148	1153		10.3964/j.issn.1000-0593(2019)04-1148-06	WOS:000466450300026
J	Pulighe, G; Lupia, F	Pulighe, Giuseppe; Lupia, Flavio	Multitemporal Geospatial Evaluation of Urban Agriculture and (Non)-Sustainable Food Self-Provisioning in Milan, Italy	SUSTAINABILITY		2071-1050		APR 1	2019	11	7				10.3390/su11071846	WOS:000466551600023
J	Agudelo-Medina, OA; Benitez-Restrepo, HD; Vivone, G; Bovik, A	Agudelo-Medina, Oscar A.; Dario Benitez-Restrepo, Hernan; Vivone, Gemine; Bovik, Alan	Perceptual Quality Assessment of Pan-Sharpened Images	REMOTE SENSING		2072-4292		APR 1	2019	11	7			877	10.3390/rs11070877	WOS:000465549300142
J	Hudson, PF; van der Hout, E; Verdaasdonk, M	Hudson, Paul F.; van der Hout, Edward; Verdaasdonk, Madelief	(Re)Development of fluvial islands along the lower Mississippi River over five decades, 1965-2015	GEOMORPHOLOGY	0169-555X	1872-695X		APR 15	2019	331		78	91		10.1016/j.geomorph.2018.11.005	WOS:000463276100007
J	Yu, B; Wang, JY; Li, J; Zhang, JR; Lai, YN; Xu, XX	Yu, Bo; Wang, Jiayuan; Li, Jie; Zhang, Jingrong; Lai, Yani; Xu, Xiaoxiao	Prediction of large-scale demolition waste generation during urban renewal: A hybrid trilogy method	WASTE MANAGEMENT	0956-053X			APR 15	2019	89		1	9		10.1016/j.wasman.2019.03.063	WOS:000470943800001	31079722
J	Kayet, N; Pathak, K; Chakrabarty, A; Kumar, S; Chowdary, VM; Singh, CP; Sahoo, S; Basumatary, S	Kayet, Narayan; Pathak, Khanindra; Chakrabarty, Abhisek; Kumar, Subodh; Chowdary, V. M.; Singh, C. P.; Sahoo, Satiprasad; Basumatary, Samrat	Assessment of foliar dust using Hyperion and Landsat satellite imagery for mine environmental monitoring in an open cast iron ore mining areas	JOURNAL OF CLEANER PRODUCTION	0959-6526	1879-1786		MAY 1	2019	218		993	1006		10.1016/j.jclepro.2019.01.305	WOS:000462110400085
J	Park, Y; Guldmann, JM	Park, Yujin; Guldmann, Jean-Michel	Creating 3D city models with building footprints and LIDAR point cloud classification: A machine learning approach	COMPUTERS ENVIRONMENT AND URBAN SYSTEMS	0198-9715	1873-7587		MAY	2019	75		76	89		10.1016/j.compenvurbsys.2019.01.004	WOS:000463120000007
J	Pincetl, S; Gillespie, TW; Pataki, DE; Porse, E; Jia, SY; Kidera, E; Nobles, N; Rodriguez, J; Choi, DA	Pincetl, Stephanie; Gillespie, Thomas W.; Pataki, Diane E.; Porse, Erik; Jia, Shenyue; Kidera, Erika; Nobles, Nick; Rodriguez, Janet; Choi, Dong-ah	Evaluating the effects of turf-replacement programs in Los Angeles	LANDSCAPE AND URBAN PLANNING	0169-2046	1872-6062		MAY	2019	185		210	221		10.1016/j.landurbplan.2019.01.011	WOS:000463125400020
J	Dubey, J; Ali, SN; Sharma, A; Morthekai, P; Singh, R; Sharma, RK; Pandey, P; Thakur, B; Srivastava, V	Dubey, Jyotsna; Ali, Sheikh Nawaz; Sharma, Anupam; Morthekai, P.; Singh, Rupendra; Sharma, R. K.; Pandey, Pratima; Thakur, Biswajeet; Srivastava, Vaibhava	Glacial Geomorphology and Landscape Evolution of the Thangu Valley, North Sikkim Himalaya, India	JOURNAL OF THE INDIAN SOCIETY OF REMOTE SENSING	0255-660X	0974-3006		MAY	2019	47	5	821	837		10.1007/s12524-019-00943-5	WOS:000466161200009
J	Shukla, SS; Mishra, M	Shukla, Shashi Shekhar; Mishra, Mallikarjun	Tracing of palaeochannels of Bakulahi river system in Uttar Pradesh, India	ARABIAN JOURNAL OF GEOSCIENCES	1866-7511	1866-7538		MAY	2019	12	9			304	10.1007/s12517-019-4429-6	WOS:000466855000002
J	Li, S; Yan, CZ; Wang, T; Du, HQ	Li, Sen; Yan, Changzhen; Wang, Tao; Du, Heqiang	Monitoring grassland reclamation in the Mu Us Desert using remote sensing from 2010 to 2015	ENVIRONMENTAL EARTH SCIENCES	1866-6280	1866-6299		MAY	2019	78	10			311	10.1007/s12665-019-8317-x	WOS:000468096000011
J	Zhou, XB; Zhou, ZM; Miao, JQ; Apple, ME; Spangler, L	Zhou, Xiaobing; Zhou, Zhaoming; Miao, Jiaqing; Apple, Martha E.; Spangler, Lee	Quantification of water and exposed lined areas of coal-bed methane water ponds using regular true-color images by developing a novel uniformness based multi-component algorithm	JOURNAL OF HYDROLOGY	0022-1694	1879-2707		MAY	2019	572		645	658		10.1016/j.jhydrol.2019.03.015	WOS:000467891900051
J	Arabameri, A; Pradhan, B; Rezaei, K; Lee, CW	Arabameri, Alireza; Pradhan, Biswajeet; Rezaei, Khalil; Lee, Chang-Wook	Assessment of Landslide Susceptibility Using Statistical- and Artificial Intelligence-Based FR-RF Integrated Model and Multiresolution DEMs	REMOTE SENSING		2072-4292		MAY 1	2019	11	9			999	10.3390/rs11090999	WOS:000469763600007
J	Horan, W; Shawe, R; Moles, R; O'Regan, B	Horan, William; Shawe, Rachel; Moles, Richard; O'Regan, Bernadette	Development and evaluation of a method to estimate the potential of decarbonisation technologies deployment at higher education campuses	SUSTAINABLE CITIES AND SOCIETY	2210-6707	2210-6715		MAY	2019	47				101464	10.1016/j.scs.2019.101464	WOS:000471280400017
J	Barbaro, G; Bombino, G; Foti, G; Borrello, MM; Puntorieri, P	Barbaro, Giuseppe; Bombino, Giuseppe; Foti, Giandomenico; Borrello, Manuela Maria; Puntorieri, Pierfabrizio	Shoreline evolution near river mouth: Case study of Petrace River (Calabria, Italy)	REGIONAL STUDIES IN MARINE SCIENCE	2352-4855			MAY	2019	29				100619	10.1016/j.rsma.2019.100619	WOS:000474363400005
J	Yin, SL; Zhang, Y; Karim, S	Yin, Shoulin; Zhang, Ye; Karim, Shahid	Region search based on hybrid convolutional neural network in optical remote sensing images	INTERNATIONAL JOURNAL OF DISTRIBUTED SENSOR NETWORKS	1550-1477			MAY	2019	15	5			1550147719852036	10.1177/1550147719852036	WOS:000482164100001
J	Bi, FK; Hou, JY; Chen, L; Yang, ZH; Wang, YP	Bi, Fukun; Hou, Jinyuan; Chen, Liang; Yang, Zhihua; Wang, Yanping	Ship Detection for Optical Remote Sensing Images Based on Visual Attention Enhanced Network	SENSORS		1424-8220		MAY 2	2019	19	10			2271	10.3390/s19102271	WOS:000471014500058	31100909
J	Arza-Garcia, M; Gil-Docampo, M; Ortiz-Sanz, J; Martinez-Rodriguez, S	Arza-Garcia, Marcos; Gil-Docampo, Mariluz; Ortiz-Sanz, Juan; Martinez-Rodriguez, Santiago	Virtual globes for UAV-based data integration: Sputnik GIS and Google Earth (TM) applications	INTERNATIONAL JOURNAL OF DIGITAL EARTH	1753-8947	1753-8955		MAY 4	2019	12	5	583	593		10.1080/17538947.2018.1470205	WOS:000463780600005
J	Hiernaux, P; Adamou, K; Moumouni, O; Turner, MD; Tong, XY; Savadogo, P; Mougin, E; Malam Issa, O	Hiernaux, Pierre; Adamou, Kalilou; Moumouni, Oumarou; Turner, Matthew D.; Tong, Xiaoye; Savadogo, Patrice; Mougin, Eric; Malam Issa, Oumarou	Expanding networks of field hedges in densely populated landscapes in the Sahel	FOREST ECOLOGY AND MANAGEMENT	0378-1127	1872-7042		MAY 15	2019	440		178	188		10.1016/j.foreco.2019.03.016	WOS:000464297900018
J	Fu, YC; Li, JF; Weng, QH; Zheng, QM; Li, L; Dai, S; Guo, BY	Fu, Yingchun; Li, Jiufeng; Weng, Qihao; Zheng, Qiming; Li, Le; Dai, Shu; Guo, Biyun	Characterizing the spatial pattern of annual urban growth by using time series Landsat imagery	SCIENCE OF THE TOTAL ENVIRONMENT	0048-9697	1879-1026		MAY 20	2019	666		274	284		10.1016/j.scitotenv.2019.02.178	WOS:000463180700028	30798237
J	Shen, JJ; Amit, Y	Shen, Jiajun; Amit, Yali	DEFORMABLE CLASSIFIERS	QUARTERLY OF APPLIED MATHEMATICS	0033-569X	1552-4485		JUN	2019	77	2	207	226		10.1090/qam/1525	WOS:000461280500002
J	Mishra, M; Dugesar, V; Prudhviraju, KN; Patel, SB; Mohan, K	Mishra, Mallikarjun; Dugesar, Vikas; Prudhviraju, K. N.; Patel, Shyam Babu; Mohan, Kshitij	Precision mapping of boundaries of flood plain river basins using high-resolution satellite imagery: A case study of the Varuna river basin in Uttar Pradesh, India	JOURNAL OF EARTH SYSTEM SCIENCE	2347-4327	0973-774X		JUN	2019	128	4			105	10.1007/s12040-019-1146-1	WOS:000464257500004
J	Huang, HF; Song, K; Yi, W; Long, JJ; Liu, Q; Zhang, GD	Huang, Haifeng; Song, Kun; Yi, Wu; Long, Jingjing; Liu, Qing; Zhang, Guodong	Use of multi-source remote sensing images to describe the sudden Shanshucao landslide in the Three Gorges Reservoir, China	BULLETIN OF ENGINEERING GEOLOGY AND THE ENVIRONMENT	1435-9529	1435-9537		JUN	2019	78	4	2591	2610		10.1007/s10064-018-1261-2	WOS:000468075000029
J	Niki, K; Okamoto, Y; Maeda, I; Mori, I; Ishii, R; Matsuda, Y; Takagi, T; Uejima, E	Niki, Kazuyuki; Okamoto, Yoshiaki; Maeda, Isseki; Mori, Ichiro; Ishii, Ryouhei; Matsuda, Yoshinobu; Takagi, Tatsuya; Uejima, Etsuko	A Novel Palliative Care Approach Using Virtual Reality for Improving Various Symptoms of Terminal Cancer Patients: A Preliminary Prospective, Multicenter Study	JOURNAL OF PALLIATIVE MEDICINE	1096-6218	1557-7740		JUN 1	2019	22	6	702	707		10.1089/jpm.2018.0527	WOS:000470005600017	30676847
J	Tschirschwitz, F; Richerzhagen, C; Przybilla, HJ; Kersten, TP	Tschirschwitz, Felix; Richerzhagen, Christian; Przybilla, Heinz-Juergen; Kersten, Thomas P.	Duisburg 1566: Transferring a Historic 3D City Model from Google Earth into a Virtual Reality Application	PFG-JOURNAL OF PHOTOGRAMMETRY REMOTE SENSING AND GEOINFORMATION SCIENCE	2512-2789	2512-2819		JUN	2019	87	1-2	47	56		10.1007/s41064-019-00065-0	WOS:000471309500004
J	Calva, LG; Golubov, J; Mandujano, MD; Lara-Dominguez, AL; Lopez-Portillo, J	Garcia Calva, Liliana; Golubov, Jordan; del Carmen Mandujano, Maria; Laura Lara-Dominguez, Ana; Lopez-Portillo, Jorge	Assessing Google Earth Pro Images for Detailed Conservation Diagnostics of Mangrove Communities	JOURNAL OF COASTAL RESEARCH	0749-0208	1551-5036		SUM	2019			33	43		10.2112/SI92-005.1	WOS:000483589300005
J	Jaturapitpornchai, R; Matsuoka, M; Kanemoto, N; Kuzuoka, S; Ito, R; Nakamura, R	Jaturapitpornchai, Raveerat; Matsuoka, Masashi; Kanemoto, Naruo; Kuzuoka, Shigeki; Ito, Riho; Nakamura, Ryosuke	Newly Built Construction Detection in SAR Images Using Deep Learning	REMOTE SENSING		2072-4292		JUN 2	2019	11	12			1444	10.3390/rs11121444	WOS:000473794600050
J	Kumar, J; Agarwal, A; Agarwal, V	Kumar, Jaynendra; Agarwal, Anshul; Agarwal, Vineeta	Optimized Design of Mini-grid System for Hilly Region	IETE JOURNAL OF RESEARCH	0377-2063	0974-780X									10.1080/03772063.2019.1620642	WOS:000473897300001
J	Fatemi, SB; Gholinejad, S	Fatemi, Sayyed Bagher; Gholinejad, Saeid	Assessing the effectiveness of Google Earth images for spatial enhancement of RapidEye multi-spectral imagery	INTERNATIONAL JOURNAL OF REMOTE SENSING	0143-1161	1366-5901		JUN 18	2019	40	12	4526	4543		10.1080/01431161.2019.1569280	WOS:000464605500004
J	Karki, S; Sultan, M; Alsefry, S; Alharbi, H; Emil, MK; Elkadiri, R; Abu Alfadail, E	Karki, Sita; Sultan, Mohamed; Alsefry, Saleh; Alharbi, Hassan; Emil, Mustafa Kemal; Elkadiri, Racha; Abu Alfadail, Emad	A remote-sensing-based intensity-duration threshold, Faifa Mountains, Saudi Arabia	NATURAL HAZARDS AND EARTH SYSTEM SCIENCES	1561-8633	1684-9981		JUN 20	2019	19	6	1235	1249		10.5194/nhess-19-1235-2019	WOS:000472519500001
J	Aliabad, FA; Shojaei, S; Zare, M; Ekhtesasi, MR	Aliabad, F. Arabi; Shojaei, S.; Zare, M.; Ekhtesasi, M. R.	Assessment of the fuzzy ARTMAP neural network method performance in geological mapping using satellite images and Boolean logic	INTERNATIONAL JOURNAL OF ENVIRONMENTAL SCIENCE AND TECHNOLOGY	1735-1472	1735-2630		JUL	2019	16	7	3829	3838		10.1007/s13762-018-1795-7	WOS:000470777200088
J	Mukherjee, J; Mukherjee, J; Chakravarty, D	Mukherjee, Jit; Mukherjee, Jayanta; Chakravarty, Debashish	Automated Seasonal Separation of Mine and Non Mine Water Bodies From Landsat 8 OLI/TIRS Using Clay Mineral and Iron Oxide Ratio	IEEE JOURNAL OF SELECTED TOPICS IN APPLIED EARTH OBSERVATIONS AND REMOTE SENSING	1939-1404	2151-1535		JUL	2019	12	7	2550	2556		10.1109/JSTARS.2019.2895385	WOS:000480354800053
J	Fung-Loy, K; Van Rompaey, A; Hemerijckx, LM	Fung-Loy, Kimberley; Van Rompaey, Anton; Hemerijckx, Lisa-Marie	Detection and Simulation of Urban Expansion and Socioeconomic Segregation in the Greater Paramaribo Region, Suriname	TIJDSCHRIFT VOOR ECONOMISCHE EN SOCIALE GEOGRAFIE	0040-747X	1467-9663		JUL	2019	110	3	339	358		10.1111/tesg.12350	WOS:000471817700008
J	Wan, L; Xiang, YM; You, HJ	Wan, Ling; Xiang, Yuming; You, Hongjian	A Post-Classification Comparison Method for SAR and Optical Images Change Detection	IEEE GEOSCIENCE AND REMOTE SENSING LETTERS	1545-598X	1558-0571		JUL	2019	16	7	1026	1030		10.1109/LGRS.2019.2892432	WOS:000473201000005
J	Mishra, D; Singh, BN	Mishra, Deeksha; Singh, B. N.	Identification of Groundwater Prospect in Bara Region of Allahabad District Based on Hydro-Geomorphological Analysis Using Satellite Imagery	JOURNAL OF THE INDIAN SOCIETY OF REMOTE SENSING	0255-660X	0974-3006		JUL	2019	47	7	1257	1273		10.1007/s12524-019-00984-w	WOS:000473156900014
J	Alvarez, M; Raposo, JF; Miranda, M; Bello, AB; Barbero, M	Alvarez, M.; Raposo, J. F.; Miranda, M.; Bello, A. B.; Barbero, M.	Development of the Montegancedo SmartCampus (UPM) based on the Spatial Data Infrastructures model	INFORMES DE LA CONSTRUCCION	0020-0883	1988-3234		JUL-SEP	2019	71	555			e307	10.3989/ic.66252	WOS:000486626100011
J	Sikola, M; Chajma, P; Andel, P; Solsky, M; Vojar, J	Sikola, Martin; Chajma, Petr; Andel, Petr; Solsky, Milic; Vojar, Jiri	Finding water: Reliability of remote-sensing methods in searching for water bodies within diverse landscapes	ECOHYDROLOGY & HYDROBIOLOGY	1642-3593	2080-3397		JUL	2019	19	3	383	392		10.1016/j.ecohyd.2019.01.001	WOS:000486571600007
J	Tan, RH; He, QS; Zhou, KH; Xie, P	Tan, Ronghui; He, Qingsong; Zhou, Kehao; Xie, Peng	The effect of new metro stations on local land use and housing prices: The case of Wuhan, China	JOURNAL OF TRANSPORT GEOGRAPHY	0966-6923	1873-1236		JUL	2019	79				102488	10.1016/j.jtrangeo.2019.102488	WOS:000488420200018
J	Santos, RD; Delgado, RC; Pereira, MG; de Souza, LP; Teodoro, PE; da Silva, CA; Costa, GGD	Santos, Raquel de Oliveira; Delgado, Rafael Coll; Pereira, Marcos Gervasio; de Souza, Leonardo Paula; Teodoro, Paulo Eduardo; da Silva Junior, Carlos Antonio; de Oliveira Costa, Giovani Glaucio	SPACE-TIME VARIABILITY OF THE RONCADOR RIVER BASIN IN THE CHANGE OF LAND USE AND COVER AND ITS CORRELATION WITH CLIMATIC VARIABLES	BIOSCIENCE JOURNAL	1981-3163			JUL-AUG	2019	35	4	1033	1042		10.14393/BJ-v35n4a2019-39486	WOS:000495365200006
J	Oliveira, PA; Peluzio, JM; da Silva, WG	Oliveira, Paulo Alexandre; Peluzio, Joenes Mucci; da Silva, Warley Gramacho	Analysis of changes in native vegetation of the APA Lago de Palmas	CIENCIA FLORESTAL	0103-9954	1980-5098		JUL-SEP	2019	29	3	1376	1388		10.5902/1980509834424	WOS:000500574800031
J	Dierssen, HM; Bostrom, KJ; Chlus, A; Hammerstrom, K; Thompson, DR; Lee, Z	Dierssen, Heidi M.; Bostrom, Kelley J.; Chlus, Adam; Hammerstrom, Kamille; Thompson, David R.; Lee, Zhongping	Pushing the Limits of Seagrass Remote Sensing in the Turbid Waters of Elkhorn Slough, California	REMOTE SENSING		2072-4292		JUL 2	2019	11	14			1664	10.3390/rs11141664	WOS:000480527800034
J	Stiller, D; Ottinger, M; Leinenkugel, P	Stiller, Dorothee; Ottinger, Marco; Leinenkugel, Patrick	Spatio-Temporal Patterns of Coastal Aquaculture Derived from Sentinel-1 Time Series Data and the Full Landsat Archive	REMOTE SENSING	2072-4292			JUL 2	2019	11	14			1707	10.3390/rs11141707	WOS:000480527800077
J	Slingsby, JA; Slingsby, PWO	Slingsby, Jasper A.; Slingsby, Peter W. O.	Monitoring the critically endangered Clanwilliam cedar with freely available Google Earth imagery	PEERJ	2167-8359			JUL 3	2019	7				e7005	10.7717/peerj.7005	WOS:000473602400001	31308994
J	Yu, YT; Yuan, Y; Guan, HY; Li, DL; Gu, TN	Yu, Yongtao; Yuan, Yan; Guan, Haiyan; Li, Dilong; Gu, Tiannan	Aeroplane detection from high-resolution remotely sensed imagery using bag-of-visual-words based hough forests	INTERNATIONAL JOURNAL OF REMOTE SENSING	0143-1161	1366-5901		JAN 2	2020	41	1	114	131		10.1080/01431161.2019.1637959	WOS:000474184000001
J	Baral, P; Haq, MA; Yaragal, S	Baral, Prashant; Haq, Mohd Anul; Yaragal, Shivaprakash	Assessment of rock glaciers and permafrost distribution in Uttarakhand, India	PERMAFROST AND PERIGLACIAL PROCESSES	1045-6740	1099-1530		JAN	2020	31	1	31	56		10.1002/ppp.2008	WOS:000474900000001
J	Brardinoni, F; Scotti, R; Sailer, R; Mair, V	Brardinoni, Francesco; Scotti, Riccardo; Sailer, Rudolf; Mair, Volkmar	Evaluating sources of uncertainty and variability in rock glacier inventories	EARTH SURFACE PROCESSES AND LANDFORMS	0197-9337	1096-9837		SEP 30	2019	44	12	2450	2466		10.1002/esp.4674	WOS:000478488700001
J	Saleem, A; Awange, JL	Saleem, A.; Awange, J. L.	Coastline shift analysis in data deficient regions: Exploiting the high spatio-temporal resolution Sentinel-2 products	CATENA	0341-8162	1872-6887		AUG	2019	179		6	19		10.1016/j.catena.2019.03.023	WOS:000468716800002
J	Arabameri, A; Pradhan, B; Rezaei, K	Arabameri, Alireza; Pradhan, Biswajeet; Rezaei, Khalil	Spatial prediction of gully erosion using ALOS PALSAR data and ensemble bivariate and data mining models	GEOSCIENCES JOURNAL	1226-4806	1598-7477		AUG	2019	23	4	669	686		10.1007/s12303-018-0067-3	WOS:000473138000010
J	Qi, F; Cui, FJ; Lv, WL; Zhang, TL; Musonda, BM	Qi, Feng; Cui, Fengjiao; Lv, Wenlong; Zhang, Tailong; Musonda, Brian Mutale	Regional similarity of shape coefficient of rural residences-Taking Hangzhou rural region as a case	BUILDING SIMULATION	1996-3599	1996-8744		AUG	2019	12	4	597	604		10.1007/s12273-019-0515-7	WOS:000473594400006
J	Tian, M; Li, J	Tian, Miao; Li, Jun	Knowledge mapping of protective clothing research-a bibliometric analysis based on visualization methodology	TEXTILE RESEARCH JOURNAL	0040-5175	1746-7748		AUG	2019	89	16	3203	3220		10.1177/0040517518809044	WOS:000477719300001
J	Yang, JH; Dong, ZB; Liu, ZY; Shi, WK; Chen, GX; Shao, TJ; Zeng, HM	Yang, Junhuai; Dong, Zhibao; Liu, Zhengyao; Shi, Weikang; Chen, Guoxiang; Shao, Tianjie; Zeng, Hanmin	Migration of barchan dunes in the western Quruq Desert, northwestern China	EARTH SURFACE PROCESSES AND LANDFORMS	0197-9337	1096-9837		AUG	2019	44	10	2016	2029		10.1002/esp.4629	WOS:000478646700010
J	Chou, CC; Li, RF; Su, YL; Tsai, CL; Chang, KY	Chou, Chien-Chang; Li, Ren-Fu; Su, Yuh-Ling; Tsai, Chaur-Luh; Chang, Ki-Yin	A study of the distribution of marine incidents in the harbours and waters surrounding Taiwan	PROCEEDINGS OF THE INSTITUTION OF MECHANICAL ENGINEERS PART M-JOURNAL OF ENGINEERING FOR THE MARITIME ENVIRONMENT	1475-0902	2041-3084		AUG	2019	233	3	809	824		10.1177/1475090218788912	WOS:000482107100010
J	El Jakani, M; Ettazarini, S; Rhinane, H; Raji, M; Radid, M; Talbi, M	El Jakani, Mustapha; Ettazarini, Said; Rhinane, Hassan; Raji, Mohammed; Radid, Mohamed; Talbi, Mohamed	Impact of Anthropogenic Facilities on the Morphodynamic Evolution of an Estuarine System: The Case of Oum Er-Rbia Estuary (Azemmour, Morocco)	JOURNAL OF MARINE SCIENCE AND ENGINEERING		2077-1312		AUG	2019	7	8			248	10.3390/jmse7080248	WOS:000482991100035
J	Dong, TY; Shen, YQ; Zhang, J; Ye, Y; Fan, J	Dong, Tianyang; Shen, Yuqi; Zhang, Jian; Ye, Yang; Fan, Jing	Progressive Cascaded Convolutional Neural Networks for Single Tree Detection with Google Earth Imagery	REMOTE SENSING		2072-4292		AUG	2019	11	15			1786	10.3390/rs11151786	WOS:000482442800050
J	Sun, H; Zhou, W; Zhang, YX; Cai, CC; Chen, Q	Sun, Hao; Zhou, Wei; Zhang, Yixiu; Cai, Chuangchuang; Chen, Qiang	Integrating spectral and textural attributes to measure magnitude in object-based change vector analysis	INTERNATIONAL JOURNAL OF REMOTE SENSING	0143-1161	1366-5901		AUG 3	2019	40	15	5749	5767		10.1080/01431161.2019.1582111	WOS:000467756400004
J	Silberbauer, M	Silberbauer, Michael	Internet-based applications for interrogating 50 years of data from the South African national water quality monitoring network	HYDROLOGICAL SCIENCES JOURNAL-JOURNAL DES SCIENCES HYDROLOGIQUES	0262-6667	2150-3435		APR 3	2020	65	5	726	734		10.1080/02626667.2019.1645334	WOS:000480283400001
J	Yan, B; Wang, MM; Jia, D; Cui, J	Yan, Bing; Wang, Maomao; Jia, Dong; Cui, Jian	Investigation and magnitude re-evaluation of the 1955 Zheduotang earthquake, eastern Tibetan Plateau, China	GEOLOGICAL JOURNAL	0072-1050	1099-1034		NOV	2020	55	11	7272	7284		10.1002/gj.3628	WOS:000483512400001
J	Badeenezhad, A; Radfard, M; Passalari, H; Parseh, I; Abbasi, F; Rostami, S	Badeenezhad, Ahmad; Radfard, Majid; Passalari, Hassan; Parseh, Iman; Abbasi, Fariba; Rostami, Saeid	Factors affecting the nitrate concentration and its health risk assessment in drinking groundwater by application of Monte Carlo simulation and geographic information system	HUMAN AND ECOLOGICAL RISK ASSESSMENT	1080-7039	1549-7860									10.1080/10807039.2019.1655634	WOS:000484144000001
J	Ashtiani, MZ; Muench, ST; Gent, D; Uhlmeyer, JS	Ashtiani, Milad Zokaei; Muench, Stephen T.; Gent, David; Uhlmeyer, Jeffrey S.	Application of satellite imagery in estimating stockpiled reclaimed asphalt pavement (RAP) inventory: A Washington State case study	CONSTRUCTION AND BUILDING MATERIALS	0950-0618	1879-0526		AUG 30	2019	217		292	300		10.1016/j.conbuildmat.2019.05.028	WOS:000474493200027
J	Xie, RR; Zhu, YC; Li, JB; Liang, QQ	Xie, Rongrong; Zhu, Yuchen; Li, Jiabing; Liang, Qianqian	Changes in sediment nutrients following Spartina alterniflora invasion in a subtropical estuarine wetland, China	CATENA	0341-8162	1872-6887		SEP	2019	180		16	23		10.1016/j.catena.2019.04.016	WOS:000472244900003
J	Cho, MA; Ramoelo, A	Cho, Moses Azong; Ramoelo, Abel	Optimal dates for assessing long-term changes in tree-cover in the semi-arid biomes of South Africa using MODIS NDVI time series (2001-2018)	INTERNATIONAL JOURNAL OF APPLIED EARTH OBSERVATION AND GEOINFORMATION	0303-2434			SEP	2019	81		27	36		10.1016/j.jag.2019.05.014	WOS:000472988200003
J	Walther, C; Huttich, C; Urban, M; Schmullius, C	Walther, Christian; Huettich, Christian; Urban, Marcel; Schmullius, Christiane	Modelling the Arctic taiga-tundra ecotone using ALOS PALSAR and optical earth observation data	INTERNATIONAL JOURNAL OF APPLIED EARTH OBSERVATION AND GEOINFORMATION	1569-8432	1872-826X		SEP	2019	81		195	206		10.1016/j.jag.2019.05.008	WOS:000472988200018
J	Pandey, P	Pandey, Pratima	Inventory of rock glaciers in Himachal Himalaya, India using high-resolution Google Earth imagery	GEOMORPHOLOGY	0169-555X	1872-695X		SEP 1	2019	340		103	115		10.1016/j.geomorph.2019.05.001	WOS:000476964400007
J	Abdollahi, S; Pourghasemi, HR; Ghanbarian, GA; Safaeian, R	Abdollahi, Sahar; Pourghasemi, Hamid Reza; Ghanbarian, Gholam Abbas; Safaeian, Roja	Prioritization of effective factors in the occurrence of land subsidence and its susceptibility mapping using an SVM model and their different kernel functions	BULLETIN OF ENGINEERING GEOLOGY AND THE ENVIRONMENT	1435-9529	1435-9537		SEP	2019	78	6	4017	4034		10.1007/s10064-018-1403-6	WOS:000482240400012
J	Firomsa, M; Abay, A	Firomsa, Misgana; Abay, Asmelash	Landslide assessment and susceptibility zonation in Ebantu district of Oromia region, western Ethiopia	BULLETIN OF ENGINEERING GEOLOGY AND THE ENVIRONMENT	1435-9529	1435-9537		SEP	2019	78	6	4229	4239		10.1007/s10064-018-1398-z	WOS:000482240400026
J	Bosino, A; Omran, A; Maerker, M	Bosino, Alberto; Omran, Adel; Maerker, Michael	Identification, characterisation and analysis of the Oltrepo Pavese calanchi in the Northern Apennines (Italy)	GEOMORPHOLOGY	0169-555X	1872-695X		SEP 1	2019	340		53	66		10.1016/j.geomorph.2019.05.003	WOS:000476964400004
J	Tesfamariam, Z; Nyssen, J; Ghebreyohannes, T; Tafere, K; Zenebe, A; Poesen, J; Deckers, S; Van Eetvelde, V	Tesfamariam, Zbelo; Nyssen, Jan; Ghebreyohannes, Tesfaalem; Tafere, Kelemework; Zenebe, Amanuel; Poesen, Jean; Deckers, Seppe; Van Eetvelde, Veerle	Transhumance as a driving force of landscape change in the marginal grabens of northern Ethiopia	SINGAPORE JOURNAL OF TROPICAL GEOGRAPHY	0129-7619	1467-9493		SEP	2019	40	3	476	495		10.1111/sjtg.12278	WOS:000483675000007
J	Liu, QH; Zhu, HT; Zhu, XM; Zeng, HL; Li, SL; Zhu, X	Liu, Qianghu; Zhu, Hongtao; Zhu, Xiaomin; Zeng, Hongliu; Li, Shunli; Zhu, Xiu	Proportional relationship between the flux of catchment-fluvial segment and their sedimentary response to diverse bedrock types in subtropical lacustrine rift basins	MARINE AND PETROLEUM GEOLOGY	0264-8172	1873-4073		SEP	2019	107		351	364		10.1016/j.marpetgeo.2019.05.031	WOS:000484871100024
J	Swartz, TM; Coon, JJ; Mattes, JR; Miller, JR	Swartz, Timothy M.; Coon, Jaime J.; Mattes, Jenna R.; Miller, James R.	Identifying Opportunities to Conserve Farm Ponds on Private Lands: Integration of Social, Ecological, and Historical Data	LAND		2073-445X		SEP	2019	8	9			127	10.3390/land8090127	WOS:000487950400004
J	Pereira, CI; Madrid, DA; Correa, ID; Pranzini, E; Botero, CM	Pereira, Cristina I.; Madrid, Diego A.; Correa, Ivan D.; Pranzini, Enzo; Botero, Camilo M.	An evaluation of human interventions in the anthropogenically disturbed Caribbean Coast of Colombia	ANTHROPOCENE	2213-3054			SEP	2019	27				100215	10.1016/j.ancene.2019.100215	WOS:000488238700004
J	Wu, WQ; Cui, HT; Hu, J; Yao, LN	Wu, Wenqing; Cui, Haotian; Hu, Jun; Yao, Lina	Detection and 3D Visualization of Deformations for High-Rise Buildings in Shenzhen, China from High-Resolution TerraSAR-X Datasets	APPLIED SCIENCES-BASEL		2076-3417		SEP	2019	9	18			3818	10.3390/app9183818	WOS:000489115200178
J	Ramirez, AG; Schneider, EB; Mehaffey, JH; Zeiger, MA; Hanks, JB; Smith, PW	Ramirez, Adriana G.; Schneider, Eric B.; Mehaffey, J. Hunter; Zeiger, Martha A.; Hanks, John B.; Smith, Philip W.	Effect of Travel Time for Thyroid Surgery on Treatment Cost and Morbidity	AMERICAN SURGEON	0003-1348	1555-9823		SEP	2019	85	9	949	955			WOS:000488526300034	31638505
J	Shamsolmoali, P; Zareapoor, M; Wang, RL; Zhou, HY; Yang, J	Shamsolmoali, Pourya; Zareapoor, Masoumeh; Wang, Ruili; Zhou, Huiyu; Yang, Jie	A Novel Deep Structure U-Net for Sea-Land Segmentation in Remote Sensing Images	IEEE JOURNAL OF SELECTED TOPICS IN APPLIED EARTH OBSERVATIONS AND REMOTE SENSING	1939-1404	2151-1535		SEP	2019	12	9	3219	3232		10.1109/JSTARS.2019.2925841	WOS:000489785800007
J	Luo, L; Wang, XY; Liu, J; Zheng, WW; Zhen, J; Zhu, LW; Liu, CS; Wan, H	Luo, Lei; Wang, Xinyuan; Liu, Jie; Zheng, Wenwu; Zhen, Jing; Zhu, Lanwei; Liu, Chuansheng; Wan, Hong	Low-Cost Archaeological Investigation and Rapid Mapping of Ancient Stone Tidal Weirs in the Penghu Archipelago Using Google Earth	SUSTAINABILITY		2071-1050		SEP 1	2019	11	17			4536	10.3390/su11174536	WOS:000486877700025
J	Zhao, ZW; Mitchell, NC; Quartau, R; Tempera, F; Bricheno, L	Zhao, Zhongwei; Mitchell, Neil C.; Quartau, Rui; Tempera, Fernando; Bricheno, Lucy	Submarine platform development by erosion of a Surtseyan cone at Capelinhos, Faial Island, Azores	EARTH SURFACE PROCESSES AND LANDFORMS	0197-9337	1096-9837		DEC	2019	44	15	2982	3006		10.1002/esp.4724	WOS:000485533100001
J	Keele, V; Gilvear, D; Large, A; Tree, A; Boon, P	Keele, Victoria; Gilvear, David; Large, Andrew; Tree, Angus; Boon, Philip	A new method for assessing river ecosystem services and its application to rivers in Scotland with and without nature conservation designations	RIVER RESEARCH AND APPLICATIONS	1535-1459	1535-1467		OCT	2019	35	8	1338	1358		10.1002/rra.3533	WOS:000486343500001
J	He, YA; Chen, G; Potter, C; Meentemeyer, RK	He, Yinan; Chen, Gang; Potter, Christopher; Meentemeyer, Ross K.	Integrating multi-sensor remote sensing and species distribution modeling to map the spread of emerging forest disease and tree mortality	REMOTE SENSING OF ENVIRONMENT	0034-4257	1879-0704		SEP 15	2019	231				111238	10.1016/j.rse.2019.111238	WOS:000484643900017
J	Smith, K; Berry, R; Clarke, LE	Smith, Katherine; Berry, Robert; Clarke, Lucy E.	Exploring the potential of Google Earth as a communication and engagement tool in collaborative Natural Flood Management planning	GEOGRAPHICAL JOURNAL	0016-7398	1475-4959		JUN	2020	186	2	171	185		10.1111/geoj.12323	WOS:000486750800001
J	Wan, H; Shao, Y; Campbell, JB; Deng, XW	Wan, Heng; Shao, Yang; Campbell, James B.; Deng, Xinwei	Mapping Annual Urban Change Using Time Series Landsat and NLCD	PHOTOGRAMMETRIC ENGINEERING AND REMOTE SENSING	0099-1112	2374-8079		OCT	2019	85	10	715	724		10.14358/PERS.85.10.715	WOS:000486660100004
J	Bergsma, EWJ; Almar, R; de Almeida, LPM; Sall, M	Bergsma, Erwin W. J.; Almar, Rafael; Melo de Almeida, Luis Pedro; Sall, Moussa	On the operational use of UAVs for video-derived bathymetry	COASTAL ENGINEERING	0378-3839	1872-7379		OCT	2019	152				103527	10.1016/j.coastaleng.2019.103527	WOS:000487172700021
J	Blahut, J; Balek, J; Klimes, J; Rowberry, M; Kusak, M; Kalina, J	Blahut, Jan; Balek, Jan; Klimes, Jan; Rowberry, Matt; Kusak, Michal; Kalina, Jan	A comprehensive global database of giant landslides on volcanic islands	LANDSLIDES	1612-510X	1612-5118		OCT	2019	16	10	2045	2052		10.1007/s10346-019-01275-8	WOS:000487283900015
J	Xu, C; Cui, YL; Xu, XW; Bao, PP; Fu, G; Jiang, WL	Xu, Chong; Cui, Yulong; Xu, Xiwei; Bao, Pengpeng; Fu, Gui; Jiang, Wenliang	An anthropogenic landslide dammed the Songmai River, a tributary of the Jinsha River in Southwestern China	NATURAL HAZARDS	0921-030X	1573-0840		OCT	2019	99	1	599	608		10.1007/s11069-019-03740-y	WOS:000489750300029
J	Chapa, F; Hariharan, S; Hack, J	Chapa, Fernando; Hariharan, Srividya; Hack, Jochen	A New Approach to High-Resolution Urban Land Use Classification Using Open Access Software and True Color Satellite Images	SUSTAINABILITY		2071-1050		OCT 1	2019	11	19			5266	10.3390/su11195266	WOS:000493525500125
J	Sunny, RC; Cheng, W; Horrillo, J	Sunny, Richards C.; Cheng, Wei; Horrillo, Juan	Video Content Analysis of the 2018 Sulawesi Tsunami, Indonesia: Impact at Palu Bay	PURE AND APPLIED GEOPHYSICS	0033-4553	1420-9136		OCT	2019	176	10	4127	4138		10.1007/s00024-019-02325-x	WOS:000495461700003
J	Schumacher, M; Duran-Diaz, P; Kurjenoja, AK; Gutierrez-Juarez, E; Gonzalez-Rivas, DA	Schumacher, Melissa; Duran-Diaz, Pamela; Kristiina Kurjenoja, Anne; Gutierrez-Juarez, Eduardo; Gonzalez-Rivas, David A.	Evolution and Collapse of Ejidos in Mexico-To What Extent Is Communal Land Used for Urban Development?	LAND		2073-445X		OCT	2019	8	10			146	10.3390/land8100146	WOS:000494482000006
J	Lee, JH; Sull, S	Lee, Jae-Hun; Sull, Sanghoon	Regression Tree CNN for Estimation of Ground Sampling Distance Based on Floating-Point Representation	REMOTE SENSING		2072-4292		OCT	2019	11	19			2276	10.3390/rs11192276	WOS:000496827100090
J	Mbanze, AA; Martins, AM; Rivaes, R; Ribeiro-Barros, AI; Ribeiro, NS	Mbanze, Aires Afonso; Martins, Amade Mario; Rivaes, Rui; Ribeiro-Barros, Ana, I; Ribeiro, Natasha Sofia	Vegetation structure and effects of human use of the dambos ecosystem in northern Mozambique	GLOBAL ECOLOGY AND CONSERVATION	2351-9894			OCT	2019	20				e00704	10.1016/j.gecco.2019.e00704	WOS:000498226800022
J	Yang, Y; Ren, GP; Li, WJ; Huang, ZP; Lin, AK; Garber, PA; Ma, C; Yi, SL; Momberg, F; Gao, Y; Wang, XW; Li, GS; Behie, A; Xiao, W	Yang, Yin; Ren, Guopeng; Li, Wenjuan; Huang, Zhipang; Lin, Aung Ko; Garber, Paul A.; Ma, Chi; Yi, Shaoliang; Momberg, Frank; Gao, Ying; Wang, Xinwen; Li, Guangsong; Behie, Alison; Xiao, Wen	Identifying transboundary conservation priorities in a biodiversity hotspot of China and Myanmar: Implications for data poor mountainous regions	GLOBAL ECOLOGY AND CONSERVATION	2351-9894			OCT	2019	20				e00732	10.1016/j.gecco.2019.e00732	WOS:000498226800037
J	Ashtekar, AS; Mohammed-Aslam, MA	Ashtekar, Avinash S.; Mohammed-Aslam, M. A.	Geospatial Technology Application for Groundwater Prospects Mapping of Sub-Upper Krishna Basin, Maharashtra	JOURNAL OF THE GEOLOGICAL SOCIETY OF INDIA	0016-7622	0974-6889		OCT	2019	94	4	419	427		10.1007/s12594-019-1331-5	WOS:000501003900012
J	Selvi, HZ; Keskin, GB	Selvi, Huseyin Zahit; Keskin, Gaye Bekiroglu	A Cartographic Analysis of Matrakci Nasuh's Miniatures	CARTOGRAPHIC JOURNAL	0008-7041	1743-2774		OCT 2	2019	56	4	280	294		10.1080/00087041.2018.1532703	WOS:000506585400002
J	Guirado, E; Tabik, S; Rivas, ML; Alcaraz-Segura, D; Herrera, F	Guirado, Emilio; Tabik, Siham; Rivas, Marga L.; Alcaraz-Segura, Domingo; Herrera, Francisco	Whale counting in satellite and aerial images with deep learning	SCIENTIFIC REPORTS	2045-2322			OCT 3	2019	9				14259	10.1038/s41598-019-50795-9	WOS:000488771400013	31582780
J	Fernandes, BM; Welch, C	Fernandes, Bernardo Mancano; Welch, Cliff	Contested landscapes: territorial conflicts and the production of different ruralities in Brazil	LANDSCAPE RESEARCH	0142-6397	1469-9710		OCT 3	2019	44	7	892	907		10.1080/01426397.2019.1595549	WOS:000490737200009
J	Crawford, ND; Haardoerfer, R; Cooper, H; McKinnon, I; Jones-Harrell, C; Ballard, A; von Hellens, SS; Young, A	Crawford, Natalie Danielle; Haardoerfer, Regine; Cooper, Hannah; McKinnon, Izraelle; Jones-Harrell, Carla; Ballard, April; von Hellens, Sierra Shantel; Young, April	Characterizing the Rural Opioid Use Environment in Kentucky Using Google Earth: Virtual Audit	JOURNAL OF MEDICAL INTERNET RESEARCH	1438-8871			OCT 4	2019	21	10			e14923	10.2196/14923	WOS:000489020700001	31588903
J	Voda, M; Kithiia, S; Jackiewicz, E; Du, QY; Sarpe, CA	Voda, Mihai; Kithiia, Shadrack; Jackiewicz, Edward; Du, Qingyun; Sarpe, Constantin Adrian	Geosystems' Pathways to the Future of Sustainability	SCIENTIFIC REPORTS	2045-2322			OCT 8	2019	9				14446	10.1038/s41598-019-50937-z	WOS:000489099500042	31594974
J	Khamchiangta, D; Dhakal, S	Khamchiangta, Dararat; Dhakal, Shobhakar	Physical and non-physical factors driving urban heat island: Case of Bangkok Metropolitan Administration, Thailand	JOURNAL OF ENVIRONMENTAL MANAGEMENT	0301-4797	1095-8630		OCT 15	2019	248				109285	10.1016/j.jenvman.2019.109285	WOS:000485210300100	31466183
J	Kong, H; Lin, JT; Zhang, RX; Liu, MY; Weng, HJ; Ni, RJ; Chen, LL; Wang, JX; Yan, YY; Zhang, Q	Kong, Hao; Lin, Jintai; Zhang, Ruixiong; Liu, Mengyao; Weng, Hongjian; Ni, Ruijing; Chen, Lulu; Wang, Jingxu; Yan, Yingying; Zhang, Qiang	High-resolution (0.05 degrees x 0.05 degrees) NOx emissions in the Yangtze River Delta inferred from OMI	ATMOSPHERIC CHEMISTRY AND PHYSICS	1680-7316	1680-7324		OCT 15	2019	19	20	12835	12856		10.5194/acp-19-12835-2019	WOS:000490549000001
J	Zhao, N; Jiao, YM; Ma, T; Zhao, MM; Fan, ZM; Yin, XZ; Liu, Y; Yue, TX	Zhao, Na; Jiao, Yimeng; Ma, Ting; Zhao, Miaomiao; Fan, Zemeng; Yin, Xiaozhe; Liu, Yu; Yue, Tianxiang	Estimating the effect of urbanization on extreme climate events in the Beijing-Tianjin-Hebei region, China	SCIENCE OF THE TOTAL ENVIRONMENT	0048-9697	1879-1026		OCT 20	2019	688		1005	1015		10.1016/j.scitotenv.2019.06.374	WOS:000481589100102	31726534
J	Sekertekin, A	Sekertekin, Aliihsan	Potential of global thresholding methods for the identification of surface water resources using Sentinel-2 satellite imagery and normalized difference water index	JOURNAL OF APPLIED REMOTE SENSING	1931-3195			OCT 24	2019	13	4			44507	10.1117/1.JRS.13.044507	WOS:000492872000003
J	Dong, RM; Li, WJ; Fu, HH; Gan, L; Yu, L; Zheng, JP; Xia, MC	Dong, Runmin; Li, Weijia; Fu, Haohuan; Gan, Lin; Yu, Le; Zheng, Juepeng; Xia, Maocai	Oil palm plantation mapping from high-resolution remote sensing images using deep learning	INTERNATIONAL JOURNAL OF REMOTE SENSING	0143-1161	1366-5901		MAR 3	2020	41	5	2022	2046		10.1080/01431161.2019.1681604	WOS:000492713800001
J	Chen, LP; Saeed, S; Sun, YJ	Chen Liping; Saeed, Sajjad; Sun Yujun	Image classification based on the linear unmixing and GEOBIA	ENVIRONMENTAL MONITORING AND ASSESSMENT	0167-6369	1573-2959		NOV	2019	191	11			649	10.1007/s10661-019-7837-x	WOS:000490980300002	31624914
J	Gul, M; Zorlu, K; Gul, M	Gul, Murat; Zorlu, Kemal; Guel, Muratcan	Assessment of mining impacts on environment in Mula-Aydn (SW Turkey) using Landsat and Google Earth imagery	ENVIRONMENTAL MONITORING AND ASSESSMENT	0167-6369	1573-2959		NOV	2019	191	11				10.1007/s10661-019-7807-3	WOS:000491085000001	31630261
J	Su, KC; Hu, BQ; Shi, KF; Zhang, ZX; Yang, QY	Su, Kangchuan; Hu, Baoqing; Shi, Kaifang; Zhang, Zhongxun; Yang, Qingyuan	The structural and functional evolution of rural homesteads in mountainous areas: A case study of Sujiaying village in Yunnan province, China	LAND USE POLICY	0264-8377	1873-5754		NOV	2019	88				104100	10.1016/j.landusepol.2019.104100	WOS:000494886800086
J	Lu, XY; Zhong, YF; Zheng, Z; Liu, YF; Zhao, J; Ma, AL; Yang, J	Lu, Xiaoyan; Zhong, Yanfei; Zheng, Zhuo; Liu, Yanfei; Zhao, Ji; Ma, Ailong; Yang, Jie	Multi-Scale and Multi-Task Deep Learning Framework for Automatic Road Extraction	IEEE TRANSACTIONS ON GEOSCIENCE AND REMOTE SENSING	0196-2892	1558-0644		NOV	2019	57	11	9362	9377		10.1109/TGRS.2019.2926397	WOS:000496155200076
J	Wong, BA; Thomas, C; Halpin, P	Wong, Brian A.; Thomas, Christian; Halpin, Patrick	Automating offshore infrastructure extractions using synthetic aperture radar & Google Earth Engine	REMOTE SENSING OF ENVIRONMENT	0034-4257	1879-0704		NOV	2019	233				111412	10.1016/j.rse.2019.111412	WOS:000497601000055
J	Fathy, I; Abd-Elhamid, H; Zelenakova, M; Kaposztasova, D	Fathy, Ismail; Abd-Elhamid, Hany; Zelenakova, Martina; Kaposztasova, Daniela	Effect of Topographic Data Accuracy on Watershed Management	INTERNATIONAL JOURNAL OF ENVIRONMENTAL RESEARCH AND PUBLIC HEALTH	1661-7827	1660-4601		NOV	2019	16	21			4245	10.3390/ijerph16214245	WOS:000498842000191	31683789
J	Javidan, N; Kavian, A; Pourghasemi, HR; Conoscenti, C; Jafarian, Z	Javidan, Narges; Kavian, Ataollah; Pourghasemi, Hamid Reza; Conoscenti, Christian; Jafarian, Zeinab	Gully Erosion Susceptibility Mapping Using Multivariate Adaptive Regression Splines-Replications and Sample Size Scenarios	WATER		2073-4441		NOV	2019	11	11			2319	10.3390/w11112319	WOS:000502264500121
J	Wu, SB; Du, C; Chen, H; Xu, YX; Guo, N; Jing, N	Wu, Songbing; Du, Chun; Chen, Hao; Xu, Yingxiao; Guo, Ning; Jing, Ning	Road Extraction from Very High Resolution Images Using Weakly labeled OpenStreetMap Centerline	ISPRS INTERNATIONAL JOURNAL OF GEO-INFORMATION		2220-9964		NOV	2019	8	11			478	10.3390/ijgi8110478	WOS:000502272600012
J	Tew, YL; Tan, ML; Samat, N; Yang, XY	Tew, Yi Lin; Tan, Mou Leong; Samat, Narimah; Yang, Xiaoying	Urban Expansion Analysis using Landsat Images in Penang, Malaysia	SAINS MALAYSIANA	0126-6039			NOV	2019	48	11	2307	2315		10.17576/jsm-2019-4811-02	WOS:000502554200002
J	Jotheri, J; de Gruchy, MW; Almaliki, R; Feadha, M	Jotheri, Jaafar; de Gruchy, Michelle W.; Almaliki, Rola; Feadha, Malath	Remote Sensing the Archaeological Traces of Boat Movement in the Marshes of Southern Mesopotamia	REMOTE SENSING		2072-4292		NOV	2019	11	21			2474	10.3390/rs11212474	WOS:000504716700015
J	Zhang, HR; Zhang, GF; Jia, QW	Zhang, Haoran; Zhang, Guifang; Jia, Qiwen	Integration of Analytical Hierarchy Process and Landslide Susceptibility Index Based Landslide Susceptibility Assessment of the Pearl River Delta Area, China	IEEE JOURNAL OF SELECTED TOPICS IN APPLIED EARTH OBSERVATIONS AND REMOTE SENSING	1939-1404	2151-1535		NOV	2019	12	11	4239	4251		10.1109/JSTARS.2019.2938554	WOS:000508437700007
J	Hamilton, M; Wessel, P; Luis, J; Taylor, B; Ko, Y	Hamilton, Michael; Wessel, Paul; Luis, Joaquim; Taylor, Brian; Ko, Youngtak	The Seagoing Scientist's Toolbox: Integrated Methods for Quality Control of Marine Geophysical Data at Sea	GEOCHEMISTRY GEOPHYSICS GEOSYSTEMS		1525-2027		NOV	2019	20	11	5415	5424		10.1029/2018GC007891	WOS:000505405400043
J	Vougat, RRBN; Chouto, S; Doua, SA; Garabed, R; Pagnah, AZ; Gonne, B	Vougat, Ronald R. B. Ngom; Chouto, Steven; Doua, Sylvain Aoudou; Garabed, Rebecca; Pagnah, Andre Zoli; Gonne, Bernard	Using Google Earth (TM) and Geographical Information System data as method to delineate sample domains for an urban household surveys: the case of Maroua (Far North Region-Cameroon)	INTERNATIONAL JOURNAL OF HEALTH GEOGRAPHICS	1476-072X			NOV 4	2019	18	1			22	10.1186/s12942-019-0186-8	WOS:000494720700001	31684960
J	Escamilla, V; Calhoun, L; Odero, N; Speizer, IS	Escamilla, Veronica; Calhoun, Lisa; Odero, Norbert; Speizer, Ilene S.	Access to public transportation and health facilities offering long-acting reversible contraceptives among residents of formal and informal settlements in two cities in Kenya	REPRODUCTIVE HEALTH		1742-4755		NOV 8	2019	16	1			161	10.1186/s12978-019-0828-0	WOS:000495753100003	31703700
J	Baker, S; Ali, M; Deerin, JF; Eltayeb, MA; Espinoza, LMC; Gasmelseed, N; Im, J; Panzner, U; Kalckreuth, VV; Keddy, KH; Pak, GD; Park, JK; Park, SE; Sooka, A; Sow, AG; Tall, A; Luby, S; Meyer, CG; Marks, F	Baker, Stephen; Ali, Mohammad; Deerin, Jessica Fung; Eltayeb, Muna Ahmed; Espinoza, Ligia Maria Cruz; Gasmelseed, Nagla; Im, Justin; Panzner, Ursula; Kalckreuth, Vera V.; Keddy, Karen H.; Pak, Gi Deok; Park, Jin Kyung; Park, Se Eun; Sooka, Arvinda; Sow, Amy Gassama; Tall, Adama; Luby, Stephen; Meyer, Christian G.; Marks, Florian	The Typhoid Fever Surveillance in Africa Program: Geospatial Sampling Frames for Household-based Studies: Lessons Learned From a Multicountry Surveillance Network in Senegal, South Africa, and Sudan	CLINICAL INFECTIOUS DISEASES	1058-4838	1537-6591		NOV 15	2019	69		S474	S482		10.1093/cid/ciz755	WOS:000496764900008	31665783
J	Hammoud, M; Santos, CMD; Gois, JP	Hammoud, Muhsen; Santos, Charles Morphy D.; Gois, Joao Paulo	iTUPA: an online automated application to perform Topographic-Unit Parsimony Analysis	BIOINFORMATICS	1367-4803	1460-2059		NOV 15	2019	35	22	4818	4820		10.1093/bioinformatics/btz487	WOS:000501728500047	31197309
J	Gitau, PN; Ndiritu, GG; Gichuki, NN	Gitau, P. N.; Ndiritu, G. G.; Gichuki, N. N.	Ecological, recreational and educational potential of a small artificial wetland in an urban environment	AFRICAN JOURNAL OF AQUATIC SCIENCE	1608-5914	1727-9364									10.2989/16085914.2019.1663721	WOS:000496627100001
J	Darmawan, S; Sari, DK; Takeuchi, W; Wikantika, K; Hernawati, R	Darmawan, Soni; Sari, Dewi K.; Takeuchi, Wataru; Wikantika, Ketut; Hernawati, Rika	Development of aboveground mangrove forests' biomass dataset for Southeast Asia based on ALOS-PALSAR 25-m mosaic	JOURNAL OF APPLIED REMOTE SENSING	1931-3195			NOV 22	2019	13	4			44519	10.1117/1.JRS.13.044519	WOS:000506174600002
J	Yildirim, C	Yildirim, Cengiz	Geomorphology of Horseshoe Island, Marguerite Bay, Antarctica	JOURNAL OF MAPS	1744-5647			DEC 9	2020	16	2	56	67		10.1080/17445647.2019.1692700	WOS:000499837000001
J	Azim, S; Rasmussen, J; Nielsen, J; Gislum, R; Laursen, MS; Christensen, S	Azim, Saiful; Rasmussen, Jesper; Nielsen, Jon; Gislum, Rene; Laursen, Morten Stigaard; Christensen, Svend	Manual geo-rectification to improve the spatial accuracy of ortho-mosaics based on images from consumer-grade unmanned aerial vehicles (UAVs)	PRECISION AGRICULTURE	1385-2256	1573-1618		DEC	2019	20	6	1199	1210		10.1007/s11119-019-09647-9	WOS:000491357300006
J	Koju, UA; Zhang, JH; Maharjan, S; Zhang, S; Bai, Y; Vijayakumar, DBIP; Yao, FM	Koju, Upama A.; Zhang, Jiahua; Maharjan, Shashish; Zhang, Sha; Bai, Yun; Vijayakumar, Dinesh B. I. P.; Yao, Fengmei	A two-scale approach for estimating forest aboveground biomass with optical remote sensing images in a subtropical forest of Nepal	JOURNAL OF FORESTRY RESEARCH	1007-662X	1993-0607		DEC	2019	30	6	2119	2136		10.1007/s11676-018-0743-1	WOS:000493611000012
J	Thior, M; Sane, T; Dieye, EB; Sy, O; Cissokho, D; Ba, BD; Descroix, L	Thior, Mamadou; Sane, Tidiane; Dieye, El hadj B.; Sy, Oumar; Cissokho, Dramane; Ba, Boubacar Demba; Descroix, Luc	Coastline dynamics of the northern Lower Casamance (Senegal) and southern Gambia littoral from 1968 to 2017	JOURNAL OF AFRICAN EARTH SCIENCES	1464-343X	1879-1956		DEC	2019	160				103611	10.1016/j.jafrearsci.2019.103611	WOS:000496039000039
J	Ferrer, N; Folch, A; Lane, M; Olago, D; Katuva, J; Thomson, P; Jou, S; Hope, R; Custodio, E	Ferrer, Nuria; Folch, Albert; Lane, Mike; Olago, Daniel; Katuva, Jacob; Thomson, Patrick; Jou, Sonia; Hope, Rob; Custodio, Emilio	How does water-reliant industry affect groundwater systems in coastal Kenya?	SCIENCE OF THE TOTAL ENVIRONMENT	0048-9697	1879-1026		DEC 1	2019	694				133634	10.1016/j.scitotenv.2019.133634	WOS:000496780900092	31756808
J	Martin, S; Uzkeda, H; Poblet, J; Bulnes, M	Martin, Santiago; Uzkeda, Hodei; Poblet, Josep; Bulnes, Mayte	Geological interpretation of two virtual outcrops of deformed Palaeozoic rocks (NW Iberian Peninsula) using 3D stereo VDT in a computer assisted virtual environment (CAVE (TM))	JOURNAL OF IBERIAN GEOLOGY	1698-6180	1886-7995		DEC	2019	45	4	565	584		10.1007/s41513-019-00110-2	WOS:000498670300002
J	Zhang, WM; Brandt, M; Wang, Q; Prishchepov, AV; Tucker, CJ; Li, YM; Lyu, H; Fensholt, R	Zhang, Wenmin; Brandt, Martin; Wang, Qiao; Prishchepov, Alexander V.; Tucker, Compton J.; Li, Yunmei; Lyu, Heng; Fensholt, Rasmus	From woody cover to woody canopies: How Sentinel-1 and Sentinel-2 data advance the mapping of woody plants in savannas	REMOTE SENSING OF ENVIRONMENT	0034-4257	1879-0704		DEC 1	2019	234				111465	10.1016/j.rse.2019.111465	WOS:000500048100004
J	Flores, D; Ocana, E; Rodriguez, AI	Flores, Daniel; Ocana, Emmanuel; Ines Rodriguez, Aixa	Relationships between landform properties and vegetation patterns in the Cerro Zonda Mt., Central Precordillera of San Juan. Argentina	JOURNAL OF SOUTH AMERICAN EARTH SCIENCES	0895-9811	1873-0647		DEC	2019	96				102359	10.1016/j.jsames.2019.102359	WOS:000506715400028
J	Gizzi, FT; Bentivenga, M; Lasaponara, R; Danese, M; Potenza, MR; Sileo, M; Masini, N	Gizzi, F. T.; Bentivenga, M.; Lasaponara, R.; Danese, M.; Potenza, M. R.; Sileo, M.; Masini, N.	Natural Hazards, Human Factors, and Ghost Towns: a Multi-Level Approach	GEOHERITAGE	1867-2477	1867-2485		DEC	2019	11	4	1533	1565		10.1007/s12371-019-00377-y	WOS:000503733300027
J	Roy, J; Saha, S; Arabameri, A; Blaschke, T; Bui, DT	Roy, Jagabandhu; Saha, Sunil; Arabameri, Alireza; Blaschke, Thomas; Bui, Dieu Tien	A Novel Ensemble Approach for Landslide Susceptibility Mapping (LSM) in Darjeeling and Kalimpong Districts, West Bengal, India	REMOTE SENSING		2072-4292		DEC 1	2019	11	23			2866	10.3390/rs11232866	WOS:000508382100147
J	Estevao, JMC	Estevao, Joao M. C.	An Integrated Computational Approach for Seismic Risk Assessment of Individual Buildings	APPLIED SCIENCES-BASEL		2076-3417		DEC	2019	9	23			5088	10.3390/app9235088	WOS:000509476600110
J	Quan, JL	Quan, JinLing	Enhanced geographic information system-based mapping of local climate zones in Beijing, China	SCIENCE CHINA-TECHNOLOGICAL SCIENCES	1674-7321	1869-1900		DEC	2019	62	12	2243	2260		10.1007/s11431-018-9417-6	WOS:000511855200018
J	Hou, W; Hou, XY	Hou, Wan; Hou, Xiyong	Data Fusion and Accuracy Analysis of Multi-Source Land Use/Land Cover Datasets along Coastal Areas of the Maritime Silk Road	ISPRS INTERNATIONAL JOURNAL OF GEO-INFORMATION		2220-9964		DEC	2019	8	12			557	10.3390/ijgi8120557	WOS:000518041800036
J	Chen, YX; Lv, ZY; Huang, B; Zhang, PD; Zhang, Y	Chen, Yixiang; Lv, Zhiyong; Huang, Bo; Zhang, Pengdong; Zhang, Yu	Automatic Extraction of Built-Up Areas from Very High-Resolution Satellite Imagery Using Patch-Level Spatial Features and Gestalt Laws of Perceptual Grouping	REMOTE SENSING		2072-4292		DEC 2	2019	11	24			3022	10.3390/rs11243022	WOS:000507333400136
J	Henshaw, AJ; Sekarsari, PW; Zolezzi, G; Gurnell, AM	Henshaw, Alexander J.; Sekarsari, Prima W.; Zolezzi, Guido; Gurnell, Angela M.	Google Earth as a data source for investigating river forms and processes: Discriminating river types using form-based process indicators	EARTH SURFACE PROCESSES AND LANDFORMS	0197-9337	1096-9837		FEB	2020	45	2	331	344		10.1002/esp.4732	WOS:000500236600001
J	Yang, HB; Yang, XP; Zhan, Y; Cunningham, D; Zhao, LQ; Sun, XY; Hu, ZK; Huang, XN; Huang, WL; Miao, SQ	Yang, Haibo; Yang, Xiaoping; Zhan, Yan; Cunningham, Dickson; Zhao, Lingqiang; Sun, Xiangyu; Hu, Zongkai; Huang, Xiongnan; Huang, Weiliang; Miao, Shuqing	Quaternary Activity of the Beihewan Fault in the Southeastern Beishan Wrench Belt, Western China: Implications for Crustal Stability and Intraplate Earthquake Hazards North of Tibet	JOURNAL OF GEOPHYSICAL RESEARCH-SOLID EARTH	2169-9313	2169-9356		DEC	2019	124	12	13286	13309		10.1029/2018JB017209	WOS:000501068600001
J	Gamshadzaei, MH; Rahimzadegan, M	Gamshadzaei, Mohammad Hossein; Rahimzadegan, Majid	Particle swarm optimization based water index (PSOWI) for mapping the water extents from satellite images	GEOCARTO INTERNATIONAL	1010-6049	1752-0762									10.1080/10106049.2019.1700554	WOS:000502413400001
J	Koshkina, A; Grigoryeva, I; Tokarsky, V; Urazaliyev, R; Kuemmerle, T; Holzel, N; Kamp, J	Koshkina, Alyona; Grigoryeva, Irina; Tokarsky, Viktor; Urazaliyev, Ruslan; Kuemmerle, Tobias; Hoelzel, Norbert; Kamp, Johannes	Marmots from space: assessing population size and habitat use of a burrowing mammal using publicly available satellite images	REMOTE SENSING IN ECOLOGY AND CONSERVATION		2056-3485		JUN	2020	6	2	153	167		10.1002/rse2.138	WOS:000503193800001
J	Liu, B; Li, XF; Zheng, G	Liu, Bin; Li, Xiaofeng; Zheng, Gang	Coastal Inundation Mapping From Bitemporal and Dual-Polarization SAR Imagery Based on Deep Convolutional Neural Networks	JOURNAL OF GEOPHYSICAL RESEARCH-OCEANS	2169-9275	2169-9291		DEC	2019	124	12	9101	9113		10.1029/2019JC015577	WOS:000502875600001
J	Henchiri, M; Ali, S; Essifi, B; Kalisa, W; Zhang, S; Bai, Y	Henchiri, Malak; Ali, Shahzad; Essifi, Bouajila; Kalisa, Wilson; Zhang, Sha; Bai, Yun	Monitoring land cover change detection with NOAA-AVHRR and MODIS remotely sensed data in the North and West of Africa from 1982 to 2015	ENVIRONMENTAL SCIENCE AND POLLUTION RESEARCH	0944-1344	1614-7499		FEB	2020	27	6	5873	5889		10.1007/s11356-019-07216-1	WOS:000503669300013	31863369
J	Benayas, JMR; Altamirano, A; Miranda, A; Catalan, G; Prado, M; Lison, F; Bullock, JM	Benayas, Jose M. Rey; Altamirano, Adison; Miranda, Alejandro; Catalan, German; Prado, Marco; Lison, Fulgencio; Bullock, James M.	Landscape restoration in a mixed agricultural-forest catchment: Planning a buffer strip and hedgerow network in a Chilean biodiversity hotspot	AMBIO	0044-7447	1654-7209		JAN	2020	49	1	310	323		10.1007/s13280-019-01149-2	WOS:000500070800026	30771208
J	Ding, C; Zhang, L; Liao, MS; Feng, GC; Dong, J; Ao, M; Yu, YH	Ding, Chao; Zhang, Lu; Liao, Mingsheng; Feng, Guangcai; Dong, Jie; Ao, Meng; Yu, Yanghai	Quantifying the spatio-temporal patterns of dune migration near Minqin Oasis in northwestern China with time series of Landsat-8 and Sentinel-2 observations	REMOTE SENSING OF ENVIRONMENT	0034-4257	1879-0704		JAN	2020	236				111498	10.1016/j.rse.2019.111498	WOS:000502894400015
J	Majeed, Z; Mukhtar, MA; Mir, RA; Kumar, P; Krishna, K	Majeed, Zahid; Mukhtar, Muneer Ahmad; Mir, Riyaz Ahmad; Kumar, Pawan; Krishna, Kalyan	Sonapani Glacier Recession over a Century from 1906-2016, Chandra Basin, Himachal Himalaya	JOURNAL OF THE GEOLOGICAL SOCIETY OF INDIA	0016-7622	0974-6889		JAN	2020	95	1	36	44		10.1007/s12594-020-1384-5	WOS:000511862900005
J	Chaudhary, S; Wang, YK; Dixit, AM; Khanal, NR; Xu, P; Fu, B; Yan, K; Liu, Q; Lu, YF; Li, M	Chaudhary, Suresh; Wang, Yukuan; Dixit, Amod Mani; Khanal, Narendra Raj; Xu, Pei; Fu, Bin; Yan, Kun; Liu, Qin; Lu, Yafeng; Li, Ming	Spatiotemporal Degradation of Abandoned Farmland and Associated Eco-Environmental Risks in the High Mountains of the Nepalese Himalayas	LAND		2073-445X		JAN	2020	9	1			1	10.3390/land9010001	WOS:000513129300004
J	Makinde, EO; Oyelade, EO	Makinde, Esther Oluwafunmilayo; Oyelade, Edward Oluwasegun	Land cover mapping using Sentinel-1 SAR and Landsat 8 imageries of Lagos State for 2017	ENVIRONMENTAL SCIENCE AND POLLUTION RESEARCH	0944-1344	1614-7499		JAN	2020	27	1	66	74		10.1007/s11356-019-05589-x	WOS:000514847300007	31201700
J	Dietler, D; Farnham, A; de Hoogh, K; Winkler, MS	Dietler, Dominik; Farnham, Andrea; de Hoogh, Kees; Winkler, Mirko S.	Quantification of Annual Settlement Growth in Rural Mining Areas Using Machine Learning	REMOTE SENSING		2072-4292		JAN	2020	12	2			235	10.3390/rs12020235	WOS:000515569800034
J	Hu, Y; Hu, YF	Hu, Yang; Hu, Yunfeng	Detecting Forest Disturbance and Recovery in Primorsky Krai, Russia, Using Annual Landsat Time Series and Multi-Source Land Cover Products	REMOTE SENSING		2072-4292		JAN	2020	12	1			129	10.3390/rs12010129	WOS:000515391700129
J	Kim, D; Lee, H; Jung, HC; Hwang, E; Hossain, F; Bonnema, M; Kang, H; Getirana, A	Kim, Donghwan; Lee, Hyongki; Jung, Hahn Chul; Hwang, Euiho; Hossain, Faisal; Bonnema, Matthew; Kang, Hyuk; Getirana, Augusto	Monitoring River Basin Development and Variation in Water Resources in Transboundary Imjin River in North and South Korea Using Remote Sensing	REMOTE SENSING		2072-4292		JAN	2020	12	1			195	10.3390/rs12010195	WOS:000515391700195
J	Tian, T; Pan, ZH; Tan, XY; Chu, ZQ	Tian, Tian; Pan, Zhihong; Tan, Xiangyu; Chu, Zhengquan	Arbitrary-Oriented Inshore Ship Detection based on Multi-Scale Feature Fusion and Contextual Pooling on Rotation Region Proposals	REMOTE SENSING		2072-4292		JAN	2020	12	2			339	10.3390/rs12020339	WOS:000515569800137
J	Yun, MS; Nam, WJ; Lee, SW	Yun, Min-Sub; Nam, Woo-Jeoung; Lee, Seong-Whan	Coarse-to-Fine Deep Metric Learning for Remote Sensing Image Retrieval	REMOTE SENSING		2072-4292		JAN	2020	12	2			219	10.3390/rs12020219	WOS:000515569800018
J	Zhan, SF; Wang, MC; Wang, M; Shao, QQ; Zhang, ZF; Jiang, WX; Chen, XM	Zhan, Shuifen; Wang, Mingchao; Wang, Min; Shao, Qianqian; Zhang, Zefang; Jiang, Wenxin; Chen, Xuemin	Numerical Study on the Leakage and Diffusion Characteristics of Low-Solubility and Low-Volatile Dangerous Chemicals from Ship in Inland Rivers	CMES-COMPUTER MODELING IN ENGINEERING & SCIENCES	1526-1492	1526-1506			2020	123	1	217	235		10.32604/cmes.2020.08289	WOS:000522396100010
J	Arabameri, A; Chen, W; Blaschke, T; Tiefenbacher, JP; Pradhan, B; Bui, DT	Arabameri, Alireza; Chen, Wei; Blaschke, Thomas; Tiefenbacher, John P.; Pradhan, Biswajeet; Dieu Tien Bui	Gully Head-Cut Distribution Modeling Using Machine Learning Methods-A Case Study of NW Iran	WATER		2073-4441		JAN	2020	12	1			16	10.3390/w12010016	WOS:000519847200016
J	Jiang, SL; Yao, W; Wong, MS; Li, G; Hong, ZH; Kuc, TY; Tong, XH	Jiang, Shenlu; Yao, Wei; Wong, Man Sing; Li, Gen; Hong, Zhonghua; Kuc, Tae-Yong; Tong, Xiaohua	An Optimized Deep Neural Network Detecting Small and Narrow Rectangular Objects in Google Earth Images	IEEE JOURNAL OF SELECTED TOPICS IN APPLIED EARTH OBSERVATIONS AND REMOTE SENSING	1939-1404	2151-1535			2020	13		1068	1081		10.1109/JSTARS.2020.2975606	WOS:000528932700001
J	Yazici, N; Inan, B	Yazici, Nilufer; Inan, Bekir	DETERMINATION OF TEMPORAL CHANGE IN LAND USE BY GEOGRAPHICAL INFORMATION SYSTEMS: THE CASE OF CANDIR VILLAGE OF TURKEY	FRESENIUS ENVIRONMENTAL BULLETIN	1018-4619	1610-2304			2020	29	5	3579	3593			WOS:000535839400029
J	Zhuang, Y; Li, LL; Chen, H	Zhuang, Yin; Li, Lianlin; Chen, He	Small Sample Set Inshore Ship Detection From VHR Optical Remote Sensing Images Based on Structured Sparse Representation	IEEE JOURNAL OF SELECTED TOPICS IN APPLIED EARTH OBSERVATIONS AND REMOTE SENSING	1939-1404	2151-1535			2020	13		2145	2160		10.1109/JSTARS.2020.2987827	WOS:000542949600002
J	Horota, RK; Aires, AS; Marques, A; Rossa, P; de Souza, EM; Gonzaga, L; Veronez, MR	Horota, Rafael Kenji; Aires, Alysson Soares; Marques, Ademir, Jr.; Rossa, Pedro; de Souza, Eniuce Menezes; Gonzaga, Luiz, Jr.; Veronez, Mauricio Roberto	Printgrammetry-3-D Model Acquisition Methodology From Google Earth Imagery Data	IEEE JOURNAL OF SELECTED TOPICS IN APPLIED EARTH OBSERVATIONS AND REMOTE SENSING	1939-1404	2151-1535			2020	13		2819	2830		10.1109/JSTARS.2020.2997239	WOS:000543715900001
J	Haroon, M; Shahzad, M; Fraz, MM	Haroon, Muhammad; Shahzad, Muhammad; Fraz, Muhammad Moazam	Multisized Object Detection Using Spaceborne Optical Imagery	IEEE JOURNAL OF SELECTED TOPICS IN APPLIED EARTH OBSERVATIONS AND REMOTE SENSING	1939-1404	2151-1535			2020	13		3032	3046		10.1109/JSTARS.2020.3000317	WOS:000545015900003
J	de Medeiros, AS; da Costa, JG; Araujo, KD; Calheiros, AR; de Sant'Anna, SAC; da Silva, JAF; Souza, MA; Nascimento, VX	de Medeiros, Amanda Silva; da Costa, Joao Gomes; Araujo, Kallianna Dantas; Calheiros, Acacia Rodrigues; Cabral de Sant'Anna, Selenobaldo Alexinaldo; Francisco da Silva, Jose Adenilson; Souza, Mayara Andrade; Nascimento, Velber Xavier	Anthropic interference in mangrove areas of the Mundau-Manguaba estuarine lagoon complex (CELMM), Alagoas (Brazil) as a case study	CIENCIA RURAL	0103-8478	1678-4596			2020	50	10			e20200356	10.1590/0103-8478cr20200356	WOS:000568675200001
J	Wubalem, A	Wubalem, Azemeraw	Modeling of Landslide susceptibility in a part of Abay Basin, northwestern Ethiopia	OPEN GEOSCIENCES	2391-5447			JAN	2020	12	1	1440	1467		10.1515/geo-2020-0206	WOS:000599647200001
J	Dong, SW; Gao, BB; Pan, YC; Li, RY; Chen, ZY	Dong, Shiwei; Gao, Bingbo; Pan, Yuchun; Li, Ruiyuan; Chen, Ziyue	Assessing the suitability of FROM-GLC10 data for understanding agricultural ecosystems in China: Beijing as a case study	REMOTE SENSING LETTERS	2150-704X	2150-7058		JAN 2	2020	11	1	11	18		10.1080/2150704X.2019.1677966	WOS:000492789500001
J	Chen, Y; Smith, TJ; York, CS; Mayall, HJ	Chen, Yan; Smith, Thomas J.; York, Cindy S.; Mayall, Hayley J.	Google Earth Virtual Reality and expository writing for young English Learners from a Funds of Knowledge perspective	COMPUTER ASSISTED LANGUAGE LEARNING	0958-8221	1744-3210		JAN 2	2020	33	1-2	1	25		10.1080/09588221.2018.1544151	WOS:000510124100001
J	Yang, FY; Feng, T; Xu, GY; Chen, Y	Yang, Fengyu; Feng, Tao; Xu, Ganyang; Chen, Ying	Applied method for water-body segmentation based on mask R-CNN	JOURNAL OF APPLIED REMOTE SENSING	1931-3195			JAN 9	2020	14	1			14502	10.1117/1.JRS.14.014502	WOS:000512690300001
J	Klai, A; Haddad, R; Bouzid, MK; Rabia, MC	Klai, Adel; Haddad, Romdhane; Bouzid, Mohamed Khaled; Rabia, Mohamed Chedly	Landslide susceptibility mapping by fuzzy gamma operator and GIS, a case study of a section of the national road n degrees 11 linking Mateur to Beja (Nortshern Tunisia)	ARABIAN JOURNAL OF GEOSCIENCES	1866-7511	1866-7538		JAN 9	2020	13	2				10.1007/s12517-019-5029-1	WOS:000513496300015
J	Hu, F; Ge, J; Lu, CF; Li, QY; Lv, SB; Li, YF; Li, ZJ; Yuan, M; Chen, Z; Liu, YM; Liu, Y; Lin, DD	Hu, Fei; Ge, Jun; Lu, Chunfang; Li, Qiyue; Lv, Shangbiao; Li, Yifeng; Li, Zhaojun; Yuan, Min; Chen, Zhe; Liu, Yueming; Liu, Ying; Lin, Dandan	Obtaining elevation of Oncomelania Hupensis habitat based on Google Earth and it's accuracy evaluation: an example from the Poyang lake region, China	SCIENTIFIC REPORTS	2045-2322			JAN 16	2020	10	1			515	10.1038/s41598-020-57458-0	WOS:000551462200031	31949235
J	Li, HZ; Han, Y; Chen, JS	Li, Hongzhong; Han, Yu; Chen, Jinsong	Combination of Google Earth imagery and Sentinel-2 data for mangrove species mapping	JOURNAL OF APPLIED REMOTE SENSING	1931-3195			JAN 17	2020	14	1			10501	10.1117/1.JRS.14.010501	WOS:000512689000001
J	Guo, R; Liu, RH; Li, N; Liu, W	Guo, Rui; Liu, Ronghua; Li, Na; Liu, Wei	DV3+HED+: a DCNN-based framework to monitor temporary works and ESAs in railway construction project using VHR satellite images	JOURNAL OF APPLIED REMOTE SENSING	1931-3195			JAN 17	2020	14	1			14507	10.1117/1.JRS.14.014507	WOS:000512693500001
J	Mahdavi, A; Aziz, J	Mahdavi, Ali; Aziz, Jalal	Estimation of Semiarid Forest Canopy Cover Using Optimal Field Sampling and Satellite Data with Machine Learning Algorithms	JOURNAL OF THE INDIAN SOCIETY OF REMOTE SENSING	0255-660X	0974-3006		APR	2020	48	4	575	583		10.1007/s12524-020-01102-x	WOS:000508691500001
J	Wu, JQ; Xu, H; Tian, Y; Zhang, YS; Zhao, JX; Lv, B	Wu, Jianqing; Xu, Hao; Tian, Yuan; Zhang, Yongsheng; Zhao, Junxuan; Lv, Bin	An automatic lane identification method for the roadside light detection and ranging sensor	JOURNAL OF INTELLIGENT TRANSPORTATION SYSTEMS	1547-2450	1547-2442		SEP 2	2020	24	5	467	479		10.1080/15472450.2020.1718500	WOS:000511734000001
J	Hembram, TK; Saha, S	Hembram, Tusar Kanti; Saha, Sunil	Prioritization of sub-watersheds for soil erosion based on morphometric attributes using fuzzy AHP and compound factor in Jainti River basin, Jharkhand, Eastern India	ENVIRONMENT DEVELOPMENT AND SUSTAINABILITY	1387-585X	1573-2975		FEB	2020	22	2	1241	1268		10.1007/s10668-018-0247-3	WOS:000511659800028
J	Li, WJ; Dong, RM; Fu, HH; Wang, J; Yu, L; Gong, P	Li, Weijia; Dong, Runmin; Fu, Haohuan; Wang, Jie; Yu, Le; Gong, Peng	Integrating Google Earth imagery with Landsat data to improve 30-m resolution land cover mapping	REMOTE SENSING OF ENVIRONMENT	0034-4257	1879-0704		FEB	2020	237				111563	10.1016/j.rse.2019.111563	WOS:000509819300035
J	Tong, XY; Xia, GS; Lu, QK; Shen, HF; Li, SY; You, SC; Zhang, LP	Tong, Xin-Yi; Xia, Gui-Song; Lu, Qikai; Shen, Huanfeng; Li, Shengyang; You, Shucheng; Zhang, Liangpei	Land-cover classification with high-resolution remote sensing images using transferable deep models	REMOTE SENSING OF ENVIRONMENT	0034-4257	1879-0704		FEB	2020	237				111322	10.1016/j.rse.2019.111322	WOS:000509819300015
J	Park, JH; Nam, WJ; Lee, SW	Park, Jae-Hyun; Nam, Woo-Jeoung; Lee, Seong-Whan	A Two-Stream Symmetric Network with Bidirectional Ensemble for Aerial Image Matching	REMOTE SENSING		2072-4292		FEB	2020	12	3			465	10.3390/rs12030465	WOS:000515393800124
J	Wang, BW; Zhang, ZX; Wang, X; Zhao, XL; Yi, L; Hu, SG	Wang, Biwei; Zhang, Zengxiang; Wang, Xiao; Zhao, Xiaoli; Yi, Ling; Hu, Shunguang	Object-Based Mapping of Gullies Using Optical Images: A Case Study in the Black Soil Region, Northeast of China	REMOTE SENSING		2072-4292		FEB	2020	12	3			487	10.3390/rs12030487	WOS:000515393800146
J	Xiao, CL; Fu, BH; Shui, HQ; Guo, ZC; Zhu, JR	Xiao, Chunlei; Fu, Bihong; Shui, Hanqing; Guo, Zhaocheng; Zhu, Jurui	Detecting the Sources of Methane Emission from Oil Shale Mining and Processing Using Airborne Hyperspectral Data	REMOTE SENSING		2072-4292		FEB	2020	12	3			537	10.3390/rs12030537	WOS:000515393800196
J	Soomro, AG; Babar, MM; Arshad, M; Memon, A; Naeem, B; Ashraf, A	Soomro, Abdul Ghani; Babar, Muhammad Munir; Arshad, Muhammad; Memon, Anila; Naeem, Babar; Ashraf, Arshad	Spatiotemporal variability in spate irrigation systems in Khirthar National Range, Sindh, Pakistan (case study)	ACTA GEOPHYSICA	1895-6572	1895-7455		FEB	2020	68	1	219	228		10.1007/s11600-019-00392-1	WOS:000516758700014
J	Li, HW; Wang, GF; Tian, GH; Jombach, S	Li, Huawei; Wang, Guifang; Tian, Guohang; Jombach, Sandor	Mapping and Analyzing the Park Cooling Effect on Urban Heat Island in an Expanding City: A Case Study in Zhengzhou City, China	LAND		2073-445X		FEB	2020	9	2			57	10.3390/land9020057	WOS:000519113300025
J	Nidhinarangkoon, P; Ritphring, S; Udo, K	Nidhinarangkoon, Pattrakorn; Ritphring, Sompratana; Udo, Keiko	Impact of Sea Level Rise on Tourism Carrying Capacity in Thailand	JOURNAL OF MARINE SCIENCE AND ENGINEERING		2077-1312		FEB	2020	8	2			104	10.3390/jmse8020104	WOS:000519244200023
J	Chen, YT; Li, YY; Wang, JS; Chen, WN; Zhang, XZ	Chen, Yantong; Li, Yuyang; Wang, Junsheng; Chen, Weinan; Zhang, Xianzhong	Remote Sensing Image Ship Detection under Complex Sea Conditions Based on Deep Semantic Segmentation	REMOTE SENSING		2072-4292		FEB	2020	12	4			625	10.3390/rs12040625	WOS:000519564600036
J	Yuan, WT; Zhang, WL; Lai, ZP; Zhang, JX	Yuan, Weitao; Zhang, Wangle; Lai, Zhongping; Zhang, Jingxiong	Extraction of Yardang Characteristics Using Object-Based Image Analysis and Canny Edge Detection Methods	REMOTE SENSING		2072-4292		FEB	2020	12	4			726	10.3390/rs12040726	WOS:000519564600137
J	Ji, L; Zhang, LP; Shen, Y; Li, X; Liu, W; Chai, Q; Zhang, R; Chen, D	Ji, Li; Zhang, Lianpeng; Shen, Yang; Li, Xing; Liu, Wei; Chai, Qi; Zhang, Rui; Chen, Dan	Object-Based Mapping of Plastic Greenhouses with Scattered Distribution in Complex Land Cover Using Landsat 8 OLI Images: A Case Study in Xuzhou, China	JOURNAL OF THE INDIAN SOCIETY OF REMOTE SENSING	0255-660X	0974-3006		FEB	2020	48	2	287	303		10.1007/s12524-019-01081-8	WOS:000517976300010
J	Manolopoulou, I; Hille, A; Emerson, B	Manolopoulou, Ioanna; Hille, Axel; Emerson, Brent	BPEC: An R Package for Bayesian Phylogeographic and Ecological Clustering	JOURNAL OF STATISTICAL SOFTWARE	1548-7660			FEB	2020	92	5	1	32		10.18637/jss.v092.i05	WOS:000522411000001
J	Karydas, C; Panagos, P	Karydas, Christos; Panagos, Panos	Towards an Assessment of the Ephemeral Gully Erosion Potential in Greece Using Google Earth	WATER		2073-4441		FEB	2020	12	2			603	10.3390/w12020603	WOS:000519846500294
J	Liu, M; Chen, NS; Zhang, Y; Deng, MF	Liu, Mei; Chen, Ningsheng; Zhang, Yong; Deng, Mingfeng	Glacial Lake Inventory and Lake Outburst Flood/Debris Flow Hazard Assessment after the Gorkha Earthquake in the Bhote Koshi Basin	WATER		2073-4441		FEB	2020	12	2			464	10.3390/w12020464	WOS:000519846500155
J	Hearn, GJ; Hart, JR	Hearn, Gareth James; Hart, Jonathan Roy	Settlements and slides: a large landslide case study from the Central Cordillera of the Philippines	QUARTERLY JOURNAL OF ENGINEERING GEOLOGY AND HYDROGEOLOGY	1470-9236	2041-4803		FEB	2020	53	1	62	73		10.1144/qjegh2019-050	WOS:000527573700008
J	Abbas, MM; Salih, AMA; Elkhider, AM; Hamid, SH	Abbas, Mohamed Mustafa; Salih, Abdin M. A.; Elkhider, Adil M.; Hamid, Salih H.	Using satellite rainfall data to estimate direct flow	DESALINATION AND WATER TREATMENT	1944-3994	1944-3986		FEB	2020	176		139	147		10.5004/dwt.2020.25510	WOS:000544992300022
J	Tian, YY; Owen, LA; Xu, C; Ma, SY; Li, K; Xu, XW; Figueiredo, PM; Kang, WJ; Guo, P; Wang, SY; Liang, XH; Maharjan, SB	Tian, Yingying; Owen, Lewis A.; Xu, Chong; Ma, Siyuan; Li, Kang; Xu, Xiwei; Figueiredo, Paula Marques; Kang, Wenjun; Guo, Peng; Wang, Siyu; Liang, Xiaohua; Maharjan, Sudan Bikash	Landslide development within 3 years after the 2015 M-w 7.8 Gorkha earthquake, Nepal	LANDSLIDES	1612-510X	1612-5118		MAY	2020	17	5	1251	1267		10.1007/s10346-020-01366-x	WOS:000516016400001
J	Tielidze, LG; Bolch, T; Wheate, RD; Kutuzov, SS; Lavrentiev, II; Zemp, M	Tielidze, Levan G.; Bolch, Tobias; Wheate, Roger D.; Kutuzov, Stanislav S.; Lavrentiev, Ivan I.; Zemp, Michael	Supra-glacial debris cover changes in the Greater Caucasus from 1986 to 2014	CRYOSPHERE	1994-0416	1994-0424		FEB 13	2020	14	2	585	598		10.5194/tc-14-585-2020	WOS:000514157700001
J	Al-Bayari, O; Sadoun, B; Shatnawi, N	Al-Bayari, Omar; Sadoun, Balqies; Shatnawi, Nawras	An Internet and wireless networking-based water pipes web application for fault reporting	INTERNATIONAL JOURNAL OF COMMUNICATION SYSTEMS	1074-5351	1099-1131		MAY 25	2020	33	8			e4363	10.1002/dac.4363	WOS:000513337000001
J	Peregrym, M; Kabas, E; Tashev, A; Dragicevic, S; Konya, EP; Savchenko, M	Peregrym, Mykyta; Kabas, Eva; Tashev, Alexander; Dragicevic, Snezana; Penzesne Konya, Erika; Savchenko, Mariia	Is Artificial Light at Night Dangerous for the Balkan Strict Protected Areas at Present?	WATER AIR AND SOIL POLLUTION	0049-6979	1573-2932		FEB 16	2020	231	2			90	10.1007/s11270-020-4452-y	WOS:000517126000001
J	Ba, MH; Ibouh, H; Lo, K; Youbi, N; Jaffal, M; Ernst, RE; Niang, AJ; Dia, I; Abdeina, E; Bensalah, MK; Boumehdi, MA; Soderlund, U	Ba, Moussa Hamath; Ibouh, Hassan; Lo, Khalidou; Youbi, Nassrddine; Jaffal, Mohammed; Ernst, Richard E.; Niang, Abdoul Jelil; Dia, Ibrahima; Abdeina, El Houssein; Bensalah, Mohamed Khalil; Boumehdi, Moulay Ahmed; Soderlund, Ulf	Spatial and temporal distribution patterns of Precambrian mafic dyke swarms in northern Mauritania (West African craton): analysis and results from remote-sensing interpretation, geographical information systems (GIS), Google Earth (TM) images, and regional geology	ARABIAN JOURNAL OF GEOSCIENCES	1866-7511	1866-7538		FEB 18	2020	13	5			209	10.1007/s12517-020-5194-2	WOS:000517225400008
J	Banshtu, RS; Versain, LD; Pandey, DD	Banshtu, Rajeshwar Singh; Versain, Laxmi Devi; Pandey, Desh Deepak	Risk assessment using quantitative approach: Central Himalaya, Kullu, Himachal Pradesh, India	ARABIAN JOURNAL OF GEOSCIENCES	1866-7511	1866-7538		FEB 21	2020	13	5			219	10.1007/s12517-020-5143-0	WOS:000515323800001
J	Mishra, M; Raju, KNP; Raju, PV	Mishra, Mallikarjun; Raju, K. N. Prudhvi; Raju, P., V	Palaeo and present channel of Assi river, Uttar Pradesh, India	CURRENT SCIENCE	0011-3891			FEB 25	2020	118	4	630	639		10.18520/cs/v118/i4/630-639	WOS:000518388000029
J	Torrente-Velasquez, JM; Giampietro, M; Ripa, M; Chifari, R	Torrente-Velasquez, Jorge M.; Giampietro, Mario; Ripa, Maddalena; Chifari, Rosaria	Landfill reactions to society actions: The case of local and global air pollutants of Cerro Patacon in Panama	SCIENCE OF THE TOTAL ENVIRONMENT	0048-9697	1879-1026		MAR 1	2020	706				135988	10.1016/j.scitotenv.2019.135988	WOS:000506376300085	31841844
J	Huang, HB; Wang, J; Liu, CX; Liang, L; Li, CC; Gong, P	Huang, Huabing; Wang, Jie; Liu, Caixia; Liang, Lu; Li, Congcong; Gong, Peng	The migration of training samples towards dynamic global land cover mapping	ISPRS JOURNAL OF PHOTOGRAMMETRY AND REMOTE SENSING	0924-2716	1872-8235		MAR	2020	161		27	36		10.1016/j.isprsjprs.2020.01.010	WOS:000517849600003
J	Mohammed, I; Marshall, M; de Bie, K; Estes, L; Nelson, A	Mohammed, Issamaldin; Marshall, Michael; de Bie, Kees; Estes, Lyndon; Nelson, Andy	A blended census and multiscale remote sensing approach to probabilistic cropland mapping in complex landscapes	ISPRS JOURNAL OF PHOTOGRAMMETRY AND REMOTE SENSING	0924-2716	1872-8235		MAR	2020	161		233	245		10.1016/j.isprsjprs.2020.01.024	WOS:000517849600018
J	Pourghasemi, HR; Razavi-Termeh, SV; Kariminejad, N; Hong, HY; Chen, W	Pourghasemi, Hamid Reza; Razavi-Termeh, Seyed Vahid; Kariminejad, Narges; Hong, Haoyuan; Chen, Wei	An assessment of metaheuristic approaches for flood assessment	JOURNAL OF HYDROLOGY	0022-1694	1879-2707		MAR	2020	582				124536	10.1016/j.jhydrol.2019.124536	WOS:000517663700057
J	Hou, B; Liu, QJ; Wang, H; Wang, YH	Hou, Bin; Liu, Qingjie; Wang, Heng; Wang, Yunhong	From W-Net to CDGAN: Bitemporal Change Detection via Deep Learning Techniques	IEEE TRANSACTIONS ON GEOSCIENCE AND REMOTE SENSING	0196-2892	1558-0644		MAR	2020	58	3	1790	1802		10.1109/TGRS.2019.2948659	WOS:000519598700020
J	Song, Y; Li, D; Hou, XY	Song, Yang; Li, Dong; Hou, Xiyong	Characteristics of Mainland Coastline Changes in Southeast Asia during the 21st Century	JOURNAL OF COASTAL RESEARCH	0749-0208	1551-5036		MAR	2020	36	2	261	275		10.2112/JCOASTRES-D-19-00018.1	WOS:000516577400006
J	Schenker, A; Cahenzli, F; Gutbrod, KG; Thevenot, M; Erhardt, A	Schenker, Andre; Cahenzli, Fabian; Gutbrod, Karl G.; Thevenot, Michel; Erhardt, Andreas	The Northern Bald Ibis Geronticus eremita in Morocco since 1900: Analysis of ecological requirements	BIRD CONSERVATION INTERNATIONAL	0959-2709	1474-0001		MAR	2020	30	1	117	138	PII S0959270919000170	10.1017/S0959270919000170	WOS:000524931500008
J	Pengra, BW; Stehman, SV; Horton, JA; Dockter, DJ; Schroeder, TA; Yang, ZQ; Cohen, WB; Healey, SP; Loveland, TR	Pengra, Bruce W.; Stehman, Stephen V.; Horton, Josephine A.; Dockter, Daryn J.; Schroeder, Todd A.; Yang, Zhiqiang; Cohen, Warren B.; Healey, Sean P.; Loveland, Thomas R.	Quality control and assessment of interpreter consistency of annual land cover reference data in an operational national monitoring program	REMOTE SENSING OF ENVIRONMENT	0034-4257	1879-0704		MAR 1	2020	238				111261	10.1016/j.rse.2019.111261	WOS:000523955200013
J	Pafi, M; Chalkias, C; Stathakis, D	Pafi, Maria; Chalkias, Christos; Stathakis, Demetris	A cost-effective method for tranquility mapping using open environmental data	ENVIRONMENT AND PLANNING B-URBAN ANALYTICS AND CITY SCIENCE	2399-8083	2399-8091		MAR	2020	47	3	417	436		10.1177/2399808318779084	WOS:000523173000005
J	Ding, MJ; Guan, QH; Li, LH; Zhang, HM; Liu, C; Zhang, L	Ding, Mingjun; Guan, Qihui; Li, Lanhui; Zhang, Huamin; Liu, Chong; Zhang, Le	Phenology-Based Rice Paddy Mapping Using Multi-Source Satellite Imagery and a Fusion Algorithm Applied to the Poyang Lake Plain, Southern China	REMOTE SENSING		2072-4292		MAR	2020	12	6			1022	10.3390/rs12061022	WOS:000526820600124
J	Lajoie, LJ; Nissen, E; Johnson, KL; Lajoie, KR	Lajoie, Lia J.; Nissen, Edwin; Johnson, Kendra L.; Lajoie, Kenneth R.	Submeter Resolution Surface Rupture Topography From Legacy Aerial Photographs-A Test Case From the 1992 Landers Earthquake	EARTH AND SPACE SCIENCE		2333-5084		MAR	2020	7	3			UNSP e2019EA000651	10.1029/2019EA000651	WOS:000529137300008
J	Shao, XY; Ma, SY; Xu, C; Shen, LL; Lu, YK	Shao, Xiaoyi; Ma, Siyuan; Xu, Chong; Shen, Lingling; Lu, Yongkun	Inventory, Distribution and Geometric Characteristics of Landslides in Baoshan City, Yunnan Province, China	SUSTAINABILITY		2071-1050		MAR 2	2020	12	6			2433	10.3390/su12062433	WOS:000523751400280
[truncated: 177 more rows]

## Sheet: Google Earth Engine
Publication Type	Authors	Author Full Names	Article Title	Source Title	ISSN	eISSN	ISBN	Publication Date	Publication Year	Volume	Issue	Start Page	End Page	Article Number	DOI	UT (Unique WOS ID)	Pubmed Id
[truncated: 565 more rows]
